# Supplementary material for: Regulation of eIF4F Translation Initiation Complex by the Peptidyl Prolyl Isomerase FKBP7 in Taxane-resistant Prostate Cancer
Source: Oxford University Press journal article supplement (doi:10.1158/1078-0432.ccr-18-0704), 2018-10-15
Supplement: 10780432ccr180704-sup-197946_3_supp_5067202_pfx74f.xlsx [file 10780432ccr180704-sup-197946_3_supp_5067202_pfx74f.xlsx]

## Sheet: Table S1A
Table S1A: Signature of 998 differentially expressed genes between various resistant IGR-CaP1 cells and parental IGR-CaP1
Accession Number	GeneID	SeqCode	PrimSeqName	Fold change (mean)
NM_005502	19	A_24_P235429	ABCA1	-6.6
NM_000927	5243	A_23_P82523	ABCB1	11.31
NM_207627	9619	A_23_P166297	ABCG1	12.39
NM_032604	84696	A_23_P17242	ABHD1	2.32
NM_032432	84448	A_23_P255672	ABLIM2	5.36
NM_014945	22885	A_24_P123408	ABLIM3	2.92
NM_021962	29	A_23_P503182	ABR	2.08
NM_000017	35	A_23_P65022	ACADS	-4.73
NM_024722	79777	A_23_P107166	ACBD4	-3.77
NM_020322	9311	A_23_P93658	ACCN3	3.61
NM_006821	10965	A_24_P301195	ACOT2	-3.05
NM_001611	54	A_23_P142075	ACP5	-5.18
NM_001099	55	A_24_P46130	ACPP	6.21
NM_001097	49	A_23_P40734	ACR	3.91
NM_025149	80221	A_23_P4190	ACSF2	2.34
AL133090; NM_021721; NM_021723	53616	A_24_P355006	ADAM22	5.56
NM_006988	9510	A_23_P211039	ADAMTS1	8.5
NM_139155	140766	A_24_P275073	ADAMTS14	-3.92
NM_139055	170689	A_23_P52749	ADAMTS15	2.4
NM_199355	170692	A_32_P34844	ADAMTS18	6.12
NM_007038	11096	A_23_P40415	ADAMTS5	9.32
NM_019032	54507	A_23_P115011	ADAMTSL4	-2.87
NM_020421	57143	A_23_P25945	ADCK1	-3.27
NM_000670	127	A_23_P30098	ADH4	3.39
NM_000024	154	A_23_P145024	ADRB2	-4.32
NM_021831	60509	A_24_P45767	AGBL5	2.05
BX640861	55750	A_32_P24059	AGK	3.68
NM_024060	79026	A_23_P21363	AHNAK	-1.61
NM_001621	196	A_23_P215566	AHR	6.83
AK123483	100506211	A_24_P886966	AK123483	-2.86
NM_152327	122481	A_23_P105963	AK7	3.74
NM_005100; NM_144497	9590	A_32_P152437	AKAP12	-4.6
NM_001626	208	A_23_P373475	AKT2	-2.77
NM_001627	214	A_23_P41227	ALCAM	-3.99
NM_004304	238	A_23_P324304	ALK	-7.27
NM_001044385	65062	A_24_P941831	ALS2CR4	4.05
NM_006982	8092	A_23_P83798	ALX1	8.06
NM_030943	81693	A_23_P48455	AMN	-2.91
NM_133265	154796	A_24_P344961	AMOT	7.3
NM_001008219	278	A_23_P23611	AMY1C	8.35
NM_144567	90806	A_24_P28622	ANGEL2	2.73
NM_012098	23452	A_23_P20864	ANGPTL2	-10.77
BC131497	253650	A_24_P172293	ANKRD18A	2.71
NM_022096	63926	A_23_P256047	ANKRD5	6.98
NM_020337	57182	A_23_P81017	ANKRD50	3.75
NM_152326	122416	A_23_P307525	ANKRD9	-2.76
NM_173551	203286	A_23_P362183	ANKS6	3.69
NM_018043	55107	A_24_P87036	ANO1	4.04
NM_020373	57101	A_32_P141238	ANO2	2.09
NM_178826	121601	A_23_P409093	ANO4	-1.17
NM_032208	84168	A_24_P131522	ANTXR1	6.7
NM_000700	301	A_23_P94501	ANXA1	6.74
NM_001002857	302	A_23_P146644	ANXA2	-2.05
NM_003734	8639	A_23_P426305	AOC3	2.89
NM_181861	317	A_23_P36611	APAF1	-2.07
NM_005883	10297	A_23_P101905	APC2	5.02
NM_015230	116984	A_32_P83784	ARAP2	-6.07
NM_001657	374	A_23_P259071	AREG	4.93
NM_024605	79658	A_23_P21548	ARHGAP10	-2.77
NM_001176	398	A_24_P215882	ARHGDIG	-3.77
NM_004840	9459	A_23_P85024	ARHGEF6	6.43
NM_032199	84159	A_23_P97871	ARID5B	-2.59
NM_004041	408	A_24_P386622	ARRB1	-4.2
NM_183376	91947	A_23_P339818	ARRDC4	2.2
NM_014960	22901	A_24_P339416	ARSG	2.18
NM_004192	8623	A_23_P159539	ASMTL	-3.33
NM_181718	253982	A_23_P170667	ASPHD1	2.71
NM_006095	10396	A_23_P30075	ATP8A1	-3.79
NM_005603	5205	A_23_P107597	ATP8B1	-2.39
NM_000332	6310	A_24_P294842	ATXN1	-4.95
NM_001127232; NM_015570	26053	A_32_P809435	AUTS2	10.44
NM_006576	10677	A_23_P390157	AVIL	6.76
NM_003782	8705	A_23_P111171	B3GALT4	-9.77
NM_212543	8702	A_32_P103945	B4GALT4	-4.64
NM_004282	9532	A_23_P356554	BAG2	-3.07
NM_001703	576	A_23_P149019	BAI2	2.52
BC004962	100506451	A_32_P144018	BC004962	3.28
BC005081	63827	A_32_P2730	BCAN	2.88
NM_031938	83875	A_23_P116187	BCO2	4.51
NM_001136106	146227	A_32_P153195	BEAN	5.26
NM_005868	10282	A_23_P59700	BET1	3.01
NM_030762	79365	A_23_P139500	BHLHE41	9.72
NM_001165	330	A_23_P98350	BIRC3	26.85
CR591083	8548	A_23_P23266	BLZF1	4.21
NM_005180	648	A_23_P314115	BMI1	3.11
NM_001719	655	A_23_P68487	BMP7	3.38
NR_026566	728053	A_32_P142128	BMS1P1	6.01
NM_000059	675	A_23_P99452	BRCA2	-6.38
NM_032043	83990	A_23_P15844	BRIP1	-4.14
BX114764	100505576	A_32_P226678	BX114764	3.9
NM_173554	219621	A_32_P8156	C10orf107	8.24
NR_027709	55853	A_23_P24275	C10orf110	3.39
NM_025145	80217	A_23_P333038	C10orf79	15.27
NM_080659	91894	A_23_P1722	C11orf52	-2.88
NM_024631	79684	A_23_P52885	C11orf61	2.8
NM_145017	220004	A_23_P98571	C11orf66	3.77
NM_013279	745	A_23_P75790	C11orf9	2.37
NR_015404	51275	A_24_P256539	C12orf47	2.06
NM_152446	145508	A_23_P320829	C14orf145	-2.49
NM_174913	161424	A_23_P326844	C14orf21	-3.12
NM_032140	84080	A_23_P14975	C16orf48	2.15
NM_001014979	90835	A_24_P842002	C16orf93	2.58
AK091537	147341	A_23_P371276	C18orf23	2.42
NM_152474	147685	A_23_P303803	C19orf18	3.91
BF436529	148223	A_24_P878992	C19ORF25	-2.81
XR_041258	374987	A_24_P110780	C1orf118	5.77
NM_033418	92342	A_23_P85726	C1orf156	3.49
NM_001013625	257177	A_32_P331139	C1orf192	9.26
NM_001122961	127003	A_32_P15512	C1orf194	15.64
NM_181643	128344	A_32_P215700	C1orf88	6.32
NR_026761	84791	A_23_P1014	C1orf97	4.7
NM_006688	10882	A_23_P77993	C1QL1	-9.66
NM_032261	84221	A_23_P371765	C21orf56	-3.28
NR_026543	114041	A_32_P34826	C21orf88	3.85
NR_026547	114043	A_24_P339858	C21orf90	2.18
NM_032561	84645	A_23_P132308	C22orf23	2.29
NM_014807	9854	A_23_P353056	C2CD2L	2.15
NM_013310	29798	A_24_P8888	C2orf27A	2.06
NM_207362	343990	A_24_P272313	C2orf55	7.86
NM_001042519	84281	A_23_P17130	C2orf88	-12.29
NM_004054	719	A_23_P2431	C3AR1	-2.79
NR_015359	404201	A_32_P116271	C4orf12	3.18
NM_001735	727	A_23_P71855	C5	6.78
NM_152408	134359	A_23_P413803	C5orf37	3.38
NM_001007189	492311	A_24_P110558	C5orf53	5.15
NM_022090	63920	A_23_P259103	C5orf54	5.96
AK025221	441108	A_24_P829156	C5orf56	2.3
NM_032947	85027	A_23_P414273	C5orf62	8
NM_001164446	647024	A_32_P218355	C6orf132	-8.65
NM_138441	115004	A_32_P1173	C6orf150	-3.86
AK098840; NM_001031743	154313	A_23_P385980	C6orf165	3.27
NM_173830	285753	A_24_P189112	C6orf182	-2.64
BC045657	387119	A_32_P90709	C6orf204	-3.93
NM_153246	221416	A_23_P348183	C6orf223	-7.12
NM_018452	729515	A_24_P144620	C6orf35	-2.52
NM_025059	80129	A_23_P93514	C6orf97	3.97
NM_145111	221786	A_23_P168810	C7orf38	3.06
NM_182597	286006	A_24_P380679	C7orf53	4.83
NM_001100159	136288	A_32_P3955	C7orf57	15.64
NM_020130	56892	A_23_P253350	C8orf4	-1.8
NM_001012502	286207	A_24_P229638	C9orf117	13.1
NM_203403	286343	A_23_P83007	C9orf150	5.06
NM_152569	157983	A_32_P115220	C9orf66	-6.33
NM_021098	8912	A_23_P3483	CACNA1H	3.3
NM_145814	59285	A_23_P501933	CACNG6	5.88
NM_021189	57863	A_23_P201156	CADM3	-2.61
NM_001033953	796	A_24_P198178	CALCA	5.04
NM_005795	10203	A_23_P39898	CALCRL	-17.44
NM_033138	800	A_23_P42575	CALD1	-3.98
NM_020397	57118	A_23_P124252	CAMK1D	11.11
NM_018584	55450	A_23_P11800	CAMK2N1	6.67
NM_004345	820	A_23_P253791	CAMP	7.55
NM_203459	23271	A_23_P406702	CAMSAP1L1	3.61
NM_001747	822	A_23_P165636	CAPG	-2.66
NM_001017534	114769	A_23_P64173	CARD16	7.92
NM_170589	57082	A_24_P378331	CASC5	-4.63
NM_001753	857	A_24_P12626	CAV1	2.95
NM_001234	859	A_24_P251599	CAV3	2.84
NM_175709	23492	A_23_P250735	CBX7	2.74
NM_017667; NM_024553	55610	A_24_P409219	CCDC132	5.23
NM_032269	84229	A_23_P129367	CCDC135	9.16
NM_138803	130940	A_23_P411825	CCDC148	4.41
NM_012337	25790	A_23_P62642	CCDC19	4.32
NM_001080850	728621	A_24_P349196	CCDC30	7.13
NM_001144872	387885	A_24_P84099	CCDC42B	3.42
NM_001237	890	A_23_P58321	CCNA2	-5.12
NM_033031	85417	A_23_P171107	CCNB3	3.13
NM_001039577	81669	A_24_P376339	CCNL2	2.49
AF011794; NM_020739	9236	A_23_P48897	CCPG1	4.76
NM_001039803	23552	A_23_P20752	CCRK	2.4
AK092180	643253	A_24_P491087	CCT6P1	3.38
NM_133493	135228	A_23_P331928	CD109	-6.52
NM_012120	23607	A_24_P329152	CD2AP	-2.78
NM_001001547	948	A_23_P111583	CD36	5.99
NM_000610	960	A_23_P24870	CD44	-5.98
NM_000574	1604	A_23_P374862	CD55	3.25
NM_001252	970	A_23_P119202	CD70	6.81
NM_001253	988	A_23_P156471	CDC5L	-2.59
NA	57514	A_32_P226620	CDGAP	-14.39
NM_004062	1014	A_23_P100240	CDH16	16.85
NM_022124	64072	A_23_P364437	CDH23	6.97
CR623381; NM_017774	54901	A_23_P44781	CDKAL1	-2.41
NM_003948	8999	A_23_P259270	CDKL2	4.16
NM_001024912; NM_001712	634	A_23_P434118	CEACAM1	-3.18
NM_007352	23436	A_23_P200579	CELA3B	-11.19
NM_153223	153241	A_24_P137602	CEP120	3.64
NM_003869; NM_198061	8824	A_24_P13790	CES2	3.76
NM_000204	3426	A_23_P7212	CFI	16.36
NM_032866	84952	A_23_P163306	CGNL1	-4.37
NM_006569	10669	A_23_P403445	CGREF1	2.76
NM_012124	26973	A_23_P138805	CHORDC1	-2.86
NM_000080	1145	A_23_P304279	CHRNE	-2.82
NM_133467	163732	A_23_P306804	CITED4	-3.75
NM_018204	26586	A_24_P99090	CKAP2	-2.27
NM_152515	150468	A_23_P388812	CKAP2L	-2.89
NM_012129	9069	A_23_P412515	CLDN12	2.63
NM_001306	1365	A_23_P71017	CLDN3	2.08
NM_003278	7123	A_23_P69497	CLEC3B	2.99
NM_004362	1047	A_23_P18684	CLGN	7.3
NM_020666	57396	A_24_P123521	CLK4	4.06
NM_030813	81570	A_23_P75978	CLPB	-3.21
NM_022111	63967	A_23_P126212	CLSPN	-3.28
NM_001142343	1240	A_24_P766716	CMKLR1	10.8
NM_052999	113540	A_23_P106663	CMTM1	2.59
NM_147164	1271	A_23_P9402	CNTFR	-2.68
NM_033655	79937	A_23_P9135	CNTNAP3	8.14
NM_004370	1303	A_23_P214168	COL12A1	-6.52
NM_000494	1308	A_23_P52323	COL17A1	-2.41
NM_030582	80781	A_23_P211212	COL18A1	-2.3
NM_020882	57642	A_32_P185637	COL20A1	4.32
NM_152890	255631	A_23_P74701	COL24A1	11.58
BC036669	84570	A_32_P405010	COL25A1	-6.44
NM_000093	1289	A_23_P158593	COL5A1	6.3
NM_017421	51805	A_23_P111228	COQ3	-2.85
NM_144613	125965	A_24_P267523	COX6B2	-3.47
CR624517	100505938	A_32_P162709	CR624517	5.61
NM_130898	148327	A_23_P63232	CREB3L4	2.1
NM_001311	1396	A_23_P44674	CRIP1	2.75
NM_004750	9244	A_23_P56197	CRLF1	4.81
NM_021151	54677	A_23_P168669	CROT	4.46
NM_001888	1428	A_23_P77731	CRYM	2.03
NM_005211	1436	A_23_P110791	CSF1R	-3.14
NM_022640	1442	A_23_P381347	CSH1	-2.62
NM_001323	1474	A_23_P146946	CST6	-3.85
NM_005213	1475	A_23_P170233	CSTA	-5.17
NM_139250	246100	A_23_P148541	CTAG1A	4.65
NM_022034	50624	A_23_P47058	CUZD1	3.69
NM_004887	9547	A_23_P213745	CXCL14	-4.26
NM_002089	2920	A_23_P315364	CXCL2	23.24
NM_002090	2921	A_24_P183150	CXCL3	2.14
NM_001008540	7852	A_23_P102000	CXCR4	-19.09
NM_032687	50626	A_23_P123555	CYHR1	2.57
NM_001082	8529	A_24_P168494	CYP4F2	-2.86
NM_006716	10926	A_24_P943358	DBF4	4.77
NM_001048226	55861	A_23_P28772	DBNDD2	2.98
NM_024819	79877	A_24_P58331	DCAKD	-3.12
NM_016356	51473	A_23_P134162	DCDC2	-5.24
NM_004734	9201	A_23_P369994	DCLK1	-4.85
NM_000555	1641	A_23_P500328	DCX	3.64
NM_000790	1644	A_23_P145644	DDC	3.09
NM_017631	55601	A_23_P41470	DDX60	6.24
NM_001012967	91351	A_23_P30069	DDX60L	5.91
NM_021008	10522	A_32_P35375	DEAF1	-2.85
NM_005218	1672	A_23_P71480	DEFB1	-3.43
NM_144973	160518	A_23_P379746	DENND5B	-2.66
NM_017779	55635	A_23_P200310	DEPDC1	-3.43
NM_001927	1674	A_23_P90710	DES	-3.23
NM_001346	1608	A_23_P40926	DGKG	-6.98
NM_138452	115817	A_23_P48747	DHRS1	-4.01
NM_019030	54505	A_23_P81463	DHX29	3.51
Y15909	1730	A_32_P50834	DIAPH2	-4.23
XM_001715987	54553	A_23_P413303	DKFZP434I0714	4.69
NR_002186	222161	A_23_P403398	DKFZP586I1420	6.17
NM_182643	10395	A_23_P252721	DLC1	-8.34
NM_001364	1740	A_23_P124514	DLG2	-6.13
NM_001365	1742	A_23_P411102	DLG4	2.53
NM_014750	9787	A_23_P88331	DLGAP5	-3.6
NM_005618	28514	A_23_P167920	DLL1	3.24
NM_005220	1747	A_24_P296587	DLX3	4.55
NM_021240	58524	A_23_P157895	DMRT3	-6.86
NM_021145	9988	A_23_P8664	DMTF1	3.81
NM_018897	56171	A_24_P410776	DNAH7	4.57
NM_013238	29103	A_23_P117190	DNAJC15	-3.4
NM_014787	9829	A_23_P95359	DNAJC6	-5.22
NM_003462	7802	A_23_P160377	DNALI1	3.66
NM_015569	26052	A_23_P371266	DNM3	3.69
NM_004946	1794	A_24_P408704	DOCK2	-4.33
NM_203447	81704	A_32_P181077	DOCK8	-11.06
NM_138815	151871	A_23_P405885	DPPA2	-7.37
NM_173812	283417	A_23_P374250	DPY19L2	8.31
NR_003561	349152	A_24_P186608	DPY19L2P2	4.37
AK098759	442523	A_24_P409483	DPY19L2P4	5.08
NM_013352	29940	A_23_P19226	DSE	5.32
NM_007207	11221	A_23_P51856	DUSP10	2.95
NM_001007271	51207	A_23_P104471	DUSP13	-6.05
NM_017823	54935	A_23_P103232	DUSP23	3.28
NM_024680	79733	A_23_P35871	E2F8	-3.09
NM_032437	84455	A_32_P137266	EFCAB7	3.58
NM_001963	1950	A_23_P155979	EGF	4.05
NM_001008394	493861	A_23_P65068	EID3	3.86
CR595813	8894	A_32_P11723	EIF2S2	3.27
AL117645	2005	A_24_P902091	ELK4	4.13
AJ277914	56956	A_24_P910952	ENST00000367391	-3.61
NA	221391	A_23_P58934	ENST00000371211	1.91
NM_001431	2037	A_23_P134109	EPB41L2	-4.33
NM_019114	54566	A_23_P387656	EPB41L4B	6.27
NM_001006943	2046	A_24_P419239	EPHA8	-6.69
NM_173567	253152	A_23_P43898	EPHX4	-4.26
NM_014805	9852	A_24_P627984	EPM2AIP1	4.38
NM_004447	2059	A_23_P136347	EPS8	-6.61
NM_022350	64167	A_23_P30243	ERAP2	3.5
NM_178040	23085	A_24_P162293	ERC1	-2.45
NM_017669	54821	A_23_P96325	ERCC6L	-4.61
NM_033266	10595	A_23_P49310	ERN2	-3.06
NM_152321	121506	A_23_P139687	ERP27	8.33
NM_015051	23071	A_23_P373927	ERP44	4.55
NM_016337	51466	A_23_P129038	EVL	-2.95
NM_017820	54932	A_24_P49183	EXD3	5.25
NM_015065	23086	A_24_P937691	EXPH5	3.74
EY892390	147372	A_32_P171043	EY892390	2.91
NM_004101	2151	A_32_P60065	F2RL2	8.24
NM_000130	2153	A_23_P148768	F5	35.02
NM_004265	9415	A_24_P150160	FADS2	-3.49
NM_181709	144347	A_32_P200697	FAM101A	4.72
NM_031453	83641	A_23_P149975	FAM107B	3.7
CR601458	642273	A_32_P47643	FAM110C	32.65
BU684362; NM_022074	63901	A_23_P203332	FAM111A	9.31
NM_145019	220108	A_23_P344568	FAM124A	3.25
NM_053279	83648	A_23_P334955	FAM167A	12.01
NM_199280	165186	A_24_P595717	FAM179A	-7.49
NM_001101376	440585	A_24_P847326	FAM183A	4.4
NM_016613	51313	A_23_P218928	FAM198B	-16.14
NM_001146157	643161	A_32_P34138	FAM25A	-3.63
NM_001010919	441168	A_23_P7827	FAM26F	5.65
BC119675	100131997	A_23_P348979	FAM27E3	2.75
NM_021806	60343	A_23_P45488	FAM3A	-3.26
AF086529; NM_022751	64762	A_24_P652510	FAM59A	3.28
NM_001040217	55793	A_23_P160546	FAM63A	2.76
NM_032599	84691	A_23_P134204	FAM71F1	6.66
NM_152548	153643	A_23_P360354	FAM81B	16.12
NM_145175	151354	A_23_P306215	FAM84A	2.56
NM_201400	196483	A_24_P392022	FAM86A	2.4
NM_016062	51647	A_23_P77455	FAM96B	2.28
NM_018099	55711	A_23_P150903	FAR2	8.47
NM_004104	2194	A_23_P44132	FASN	-6.02
NM_001004019	2199	A_23_P143981	FBLN2	-3.76
NM_001999	2201	A_23_P214026	FBN2	5.51
NM_153350	146330	A_23_P406385	FBXL16	5.83
NM_152676	201456	A_23_P342709	FBXO15	3.48
NM_033506	26261	A_23_P70888	FBXO24	2.87
NM_183420; NM_183421	26260	A_24_P247931	FBXO25	2.01
NM_001122980	83953	A_23_P201510	FCAMR	2.25
NR_024377	80307	A_23_P80048	FER1L4	3.32
NM_006832	10979	A_23_P88347	FERMT2	-3.86
NM_000800	2246	A_24_P111106	FGF1	-9.79
NM_005130	9982	A_23_P30126	FGFBP1	-6.09
NM_213647	2264	A_23_P92754	FGFR4	-4.73
NM_025135	80206	A_32_P34444	FHOD3	5.77
NM_181342	51661	A_23_P79622	FKBP7	3.02
NM_018071	55701	A_23_P99661	FLJ10357	2.03
AF088062	644873	A_32_P147149	FLJ33630	2.45
NR_015375	401491	A_32_P473302	FLJ35024	3.89
AK094963	400618	A_24_P497464	FLJ37644	1.87
NM_017791	55640	A_23_P140373	FLVCR2	5.32
NM_002022	2329	A_23_P160992	FMO4	3.65
NM_152578	158521	A_32_P99019	FMR1NB	2.34
NM_021784	3170	A_23_P500936	FOXA2	-1.85
NM_023067	668	A_23_P110052	FOXL2	-4.59
NM_002031	2444	A_23_P133665	FRK	4.92
NM_032020	2519	A_23_P145408	FUCA2	-2.59
NM_173160	53828	A_23_P98121	FXYD4	-5.35
NM_031866	8325	A_23_P396858	FZD8	-4.81
NM_021123	2579	A_24_P228796	GAGE7	-7.17
NM_015973	51083	A_23_P374844	GAL	-7.37
NM_024572	79623	A_23_P67847	GALNT14	-8.98
NM_000155	2592	A_24_P12865	GALT	2.15
NM_002048	2619	A_23_P83134	GAS1	12.73
NM_001481	2622	A_24_P279203	GAS8	2.13
NM_002053	2633	A_23_P62890	GBP1	-6.43
NM_182625	348654	A_24_P177585	GEN1	-4.43
NM_016095	51659	A_23_P118246	GINS2	-2.19
NM_000166	2705	A_23_P250444	GJB1	-5.62
NM_005497	10052	A_23_P428287	GJC1	-6.43
NM_025211	80318	A_23_P94546	GKAP1	3.1
NM_181789	342035	A_24_P49199	GLDN	5.43
NM_006708	2739	A_23_P214411	GLO1	-2.27
AF327434	2744	A_24_P294233	GLS	7.89
NM_031302	83468	A_23_P48198	GLT8D2	-1.47
NM_004126	2791	A_23_P111701	GNG11	8.22
NM_004485	2786	A_23_P335329	GNG4	-4.07
NM_031498	2793	A_23_P26994	GNGT2	-6.25
NM_016072	51026	A_24_P321511	GOLT1B	3.6
NM_152281	92344	A_23_P368145	GORAB	3.48
NM_020918	57678	A_23_P104237	GPAM	-2.59
NM_001077191	151306	A_23_P400378	GPBAR1	2.2
NM_004484	2719	A_24_P57631	GPC3	5.13
NM_005708	10082	A_32_P97169	GPC6	5.91
NM_020752	57512	A_24_P349117	GPR158	8.96
NM_024911	79971	A_24_P256380	GPR177	-7.74
NM_005293	2843	A_23_P159237	GPR20	-3.03
NM_003485	8111	A_24_P931443	GPR68	2.89
NM_198281	285513	A_24_P76649	GPRIN3	1.43
NM_013296	29899	A_23_P63402	GPSM2	-2.11
NM_022107	63940	A_24_P144465	GPSM3	-2.71
NM_001008397	493869	A_23_P122052	GPX8	3
NM_001001555	2887	A_23_P122863	GRB10	4.37
NM_021150	23426	A_23_P113382	GRIP1	3.74
NM_138408	112495	A_23_P400465	GTF3C6	-2.19
AY927428	51512	A_24_P916195	GTSE1	-5.1
NM_005459	9626	A_23_P363331	GUCA1C	-7.45
NM_000181	2990	A_23_P334608	GUSB	2.05
NM_032304	84264	A_24_P356373	HAGHL	2.22
NM_001884	1404	A_23_P7727	HAPLN1	6.08
NM_012206	26762	A_23_P347610	HAVCR1	-2.31
NM_005330	3046	A_23_P47665	HBE1	11.94
NM_000559	3047	A_23_P53137	HBG1	6.74
NM_005331	3049	A_23_P49254	HBQ1	-4.14
NM_017885	54985	A_23_P26534	HCFC1R1	2.24
NM_014707	9734	A_23_P404162	HDAC9	6.71
NM_133636	113510	A_23_P92614	HELQ	3.99
NM_018194	55733	A_23_P136355	HHAT	4.03
NM_138571	135114	A_23_P145574	HINT3	-2.75
NM_005325	3024	A_23_P70448	HIST1H1A	-5.96
NM_005322	3009	A_23_P250385	HIST1H1B	-4.4
NM_021065	3013	A_23_P428184	HIST1H2AD	4.75
NM_021052	3012	A_23_P59045	HIST1H2AE	3.05
NM_003514	8336	A_24_P86389	HIST1H2AM	2.19
NM_003524	8345	A_23_P366216	HIST1H2BH	2.01
NM_080593	85236	A_23_P145238	HIST1H2BK	3.02
NM_003519	8340	A_23_P8013	HIST1H2BL	2.02
NM_001040874	723790	A_23_P103981	HIST2H2AA4	6.97
NM_175065	317772	A_24_P68631	HIST2H2AB	2.17
NM_003528	8349	A_24_P148321	HIST2H2BE	6.05
NM_033445	92815	A_23_P149301	HIST3H2A	2.08
NM_002114	3096	A_23_P19619	HIVEP1	3.96
NM_002125	3127	A_23_P31006	HLA-DRB5	1.5
NM_020834	57594	A_23_P76829	HOMEZ	-3.17
NM_006361	10481	A_24_P365015	HOXB13	-4.16
NM_017410	3229	A_23_P64808	HOXC13	6.37
NM_017878	54979	A_23_P105012	HRASLS2	6.71
NM_198533	374875	A_24_P267552	HSD11B1L	2.41
NM_002153	3294	A_23_P118065	HSD17B2	19.76
NM_001017963; NM_005348	3320	A_32_P199252	HSP90AA1	-3.87
NM_052970	116835	A_23_P91334	HSPA12B	-3.52
NM_005347	3309	A_24_P98411	HSPA5	2.2
NM_006597	3312	A_23_P24594	HSPA8	-2.75
NM_002156	3329	A_32_P76091	HSPD1	-2.35
NM_002775	5654	A_23_P97990	HTRA1	2.88
NM_007312;NM_153282	3373	A_23_P69329	HYAL1	-5.08
NM_002168	3418	A_23_P129209	IDH2	-3.81
NM_022168	64135	A_23_P68155	IFIH1	5.55
NM_003641	8519	A_23_P72737	IFITM1	2.91
NM_001007245	3475	A_23_P251825	IFRD1	3.18
NM_020800	57560	A_24_P255645	IFT80	4.25
NM_000612	3481	A_23_P150609	IGF2	3.02
NM_001013398	3486	A_23_P215634	IGFBP3	7.77
NM_001553	3490	A_23_P353035	IGFBP7	3.81
NM_001079526	22807	A_32_P114284	IKZF2	6.44
NM_002188	3596	A_23_P251031	IL13	6.42
NM_172174	3600	A_23_P29953	IL15	4.89
NM_003855	8809	A_24_P208567	IL18R1	7.15
NM_032556	84639	A_23_P501713	IL1F10	5.55
NM_019618	56300	A_23_P17053	IL1F9	5.83
NM_004633	7850	A_23_P79398	IL1R2	5.76
NM_002183	3563	A_32_P217750	IL3RA	1.76
NM_000565	3570	A_24_P379413	IL6R	-1.8
NM_001563	3617	A_23_P42032	IMPG1	-5.2
NM_002193	3625	A_23_P153958	INHBB	-6.85
NM_198336	3638	A_23_P22027	INSIG1	2.57
NM_152558	23288	A_23_P19852	IQCE	2.1
NM_032263	84223	A_23_P300070	IQCG	4.42
NM_016123	51135	A_24_P158903	IRAK4	3.4
NM_002200	3663	A_23_P500271	IRF5	2.52
NM_003749	8660	A_24_P154037	IRS2	2.96
NM_016358	50805	A_24_P20795	IRX4	-2.75
NM_080826	140862	A_32_P186731	ISM1	5.08
NM_199296	145501	A_23_P344125	ISM2	-5
NA	81533	A_23_P206526	ITFG1	2.94
NM_002203	3673	A_23_P70161	ITGA2	-5.63
NM_002205	3678	A_23_P36562	ITGA5	-2.82
NM_002210	3685	A_23_P50907	ITGAV	3.65
NM_002214	3696	A_23_P123060	ITGB8	10.05
NM_000214	182	A_23_P210763	JAG1	4.79
NM_032801	83700	A_23_P217998	JAM3	-16.91
NM_020647	56704	A_23_P434253	JPH1	-7.16
NM_181337	353219	A_24_P143301	KAAG1	-7.92
NM_000216	3730	A_23_P429950	KAL1	-3.89
NM_181712	163782	A_32_P51237	KANK4	-10.16
NM_032505	84541	A_23_P431252	KBTBD8	-12.66
NM_004977	3748	A_23_P101516	KCNC3	-2.83
NM_153763	3749	A_23_P12079	KCNC4	-4.99
NM_001034837	30820	A_23_P30554	KCNIP1	4.84
NM_013434	30818	A_23_P356004	KCNIP3	5.12
NM_153767	3758	A_23_P501781	KCNJ1	6.52
NM_002242	3769	A_23_P312752	KCNJ13	15.38
NR_002728	10984	A_32_P41924	KCNQ1OT1	4.48
NM_138444	115207	A_23_P377957	KCTD12	14.06
NM_152688	202559	A_23_P366453	KHDRBS2	11.91
NM_014809	9856	A_23_P168324	KIAA0319	2.76
NM_014704	9731	A_23_P200043	KIAA0562	2.07
NM_015314	23366	A_23_P305205	KIAA0895	3.87
NM_015196	23240	A_23_P257250	KIAA0922	-2.43
BC037317	23285	A_32_P98136	KIAA1107	-1.59
NM_025249	80726	A_23_P130974	KIAA1683	3.57
NM_153369	91749	A_23_P305100	KIAA1919	-2.08
NM_020782	57542	A_24_P645765	KLHDC5	3.45
NM_138433	113730	A_24_P117410	KLHDC7B	5.49
NM_020805	57565	A_23_P370830	KLHL14	3.45
NM_002257	3816	A_23_P16252	KLK1	-3.11
NM_000893	3827	A_23_P212258	KNG1	4.22
NM_016618	51315	A_23_P56759	KRCC1	3.99
NM_194455	889	A_23_P42848	KRIT1	3.57
NM_002275	3866	A_23_P27133	KRT15	11.68
NM_181534	147183	A_23_P15786	KRT25	-6.59
NM_002278	3882	A_23_P89601	KRT32	7.51
NM_005556	3855	A_23_P381945	KRT7	3.92
NM_000426	3908	A_23_P70719	LAMA2	4.45
NM_001017402	3914	A_23_P86012	LAMB3	6.03
NM_005562; NM_018891	3918	A_23_P201636	LAMC2	-2.17
NM_006059	10319	A_23_P82979	LAMC3	-4.06
NM_014398	27074	A_23_P29773	LAMP3	4.94
NM_018078	55132	A_23_P7253	LARP1B	4.4
NM_002298	3936	A_23_P204847	LCP1	-3.54
NM_005566	3939	A_23_P47565	LDHA	-2.88
NM_020997	10637	A_23_P160336	LEFTY1	2.55
NM_001001552	93273	A_24_P696761	LEMD1	13.67
NM_018192	55214	A_23_P69179	LEPREL1	3.15
NM_144652	137994	A_23_P348264	LETM2	-5.36
NM_002306	3958	A_23_P128919	LGALS3	-4.09
NM_002307	3963	A_24_P238250	LGALS7	-3.89
NM_001042507	653499	A_23_P108062	LGALS7B	-2.96
NM_006499	3964	A_23_P63017	LGALS8	-2.71
NM_018490	55366	A_32_P17765	LGR4	-2.91
NM_016571	51557	A_23_P93169	LGSN	7.06
NM_014988	22998	A_23_P83403	LIMCH1	-3.71
NM_004664	8825	A_23_P99253	LIN7A	-6.33
NM_152570	158038	A_23_P157926	LINGO2	2
NM_000236	3990	A_23_P88559	LIPC	-1.72
NM_006033	9388	A_23_P78405	LIPG	4.54
NM_001015002	3993	A_24_P307869	LLGL2	-3.72
NR_027387	100128822	A_32_P6172	LOC100128822	2.35
XM_002342146	100287049	A_24_P886960	LOC100287049	2.75
XM_002342559	100289230	A_24_P932680	LOC100289230	4.55
XM_001716150	375295	A_23_P302787	LOC375295	-6.64
XM_371250	388630	A_32_P232214	LOC388630	-7.93
NR_015343	389458	A_32_P171143	LOC389458	3.47
NR_027006	400891	A_23_P80200	LOC400891	24.19
NR_015423	572558	A_32_P157208	LOC572558	6.77
XM_926406	643037	A_32_P60635	LOC643037	5.86
BC052945	643201	A_32_P30891	LOC643201	4.67
NR_027378	643763	A_32_P12552	LOC643763	-2.91
NR_027451	647979	A_32_P71437	LOC647979	4.14
NM_001162371	728392	A_23_P107351	LOC728392	2.95
XM_001716728	728431	A_32_P128391	LOC728431	2.26
NR_003713	728613	A_24_P59632	LOC728613	2.69
NR_024403	730101	A_24_P500422	LOC730101	3.43
XM_001134398	730256	A_32_P88349	LOC730256	3.86
NR_024006	92973	A_32_P47157	LOC92973	9.83
NA	4015	A_24_P37903	LOX	10.55
NM_057159	1902	A_23_P502879	LPAR1	2.74
AK091731; NM_012152	23566	A_32_P108666	LPAR3	-8.77
AK090444	79888	A_24_P941947	LPCAT1	3.36
NM_020871	57631	A_23_P73809	LRCH2	4.65
NM_144648	136332	A_24_P346517	LRGUK	3.39
NM_153377	121227	A_23_P47885	LRIG3	-44.57
NM_138360	90668	A_23_P382488	LRRC16B	2.58
NM_001080457	94030	A_23_P419503	LRRC4B	-6.05
NM_198075	115399	A_23_P368996	LRRC56	2.75
NM_012472	23639	A_23_P112004	LRRC6	4.8
NM_020873	57633	A_24_P240187	LRRN1	-2.66
AK074153	7798	A_23_P385084	LUZP1	-2.18
NM_020169	56925	A_23_P6674	LXN	-2.08
NM_201589	389692	A_24_P127719	MAFA	-2.79
NM_012301	9863	A_23_P21376	MAGI2	4.64
NM_018048	55110	A_24_P330112	MAGOHB	3.83
NM_002371	4118	A_23_P17134	MAL	4.7
NM_001031740	149175	A_23_P391228	MANEAL	3.15
NM_000898	4129	A_23_P85008	MAOB	-6.01
NM_005921	4214	A_23_P41796	MAP3K1	3.2
NM_005922	4216	A_23_P42096	MAP3K4	-2.03
NM_004579	5871	A_24_P287075	MAP4K2	-3.42
NM_178450	115123	A_23_P321511	MARCH3	2
NM_002356	4082	A_23_P214222	MARCKS	-4.46
NM_139355	4145	A_23_P50678	MATK	-4.76
NM_002381	4148	A_23_P102058	MATN3	-9.21
NM_203377	4151	A_23_P6433	MB	4.68
NM_133486	55796	A_23_P385851	MBNL3	-7.76
NM_002386	4157	A_23_P329271	MC1R	2.9
NM_020166	56922	A_23_P58036	MCCC1	2.14
NM_005369	4168	A_23_P45536	MCF2	-2.49
NM_001040179	84539	A_24_P98006	MCHR2	-2.07
NM_182751	55388	A_23_P161474	MCM10	-2.81
NM_024717	79772	A_23_P133293	MCTP1	19.04
NM_001009813	56917	A_23_P78795	MEIS3	-5.19
NM_000245	4233	A_23_P145844	MET	-2.15
NM_003480	8076	A_23_P87700	MFAP5	-91.67
NM_004225	9258	A_23_P112078	MFHAS1	-3.97
NM_002405	4242	A_24_P224926	MFNG	2.25
NM_002409	4248	A_24_P245838	MGAT3	8.27
NM_145791	4257	A_23_P36658	MGST1	-3.93
NM_000381; NM_033290	4281	A_32_P128656	MID1	12.6
AK096829	54468	A_24_P346388	MIOS	4.04
NM_002417	4288	A_24_P346855	MKI67	-4.63
NM_002423	4316	A_23_P52761	MMP7	-19.28
NM_198469	254956	A_24_P401491	MORN5	8.05
NM_019556	56180	A_23_P73835	MOSPD1	3.05
NM_001531	3140	A_23_P431939	MR1	2.3
NM_002440	4438	A_23_P74068	MSH4	5.95
NM_002449	4488	A_24_P132006	MSX2	-4.98
NR_002307	55545	A_32_P169179	MSX2P1	-4.57
NM_201278	8898	A_23_P64019	MTMR2	-2.03
NM_004685	9107	A_23_P25515	MTMR6	3.08
NM_152673	200958	A_23_P92225	MUC20	3.5
NM_000431	4598	A_24_P372901	MVK	-3.94
NM_032348	54587	A_23_P32444	MXRA8	5.23
NM_005375	4602	A_23_P31073	MYB	-3.45
NM_014981	22989	A_24_P11900	MYH15	4.14
NM_002476	4635	A_24_P188218	MYL4	-2.72
NM_012334	4651	A_23_P7596	MYO10	-3.11
NM_002478	4654	A_24_P30257	MYOD1	-2.59
NM_004535	4661	A_23_P210835	MYT1	3.43
NM_052818	90634	A_23_P76658	N4BP2L1	9.53
NM_005966	4664	A_24_P191417	NAB1	3.68
NM_004536	4671	A_24_P72139	NAIP	3.9
NM_153757	266812	A_23_P144369	NAP1L5	-2.44
NR_003108	10230	A_23_P4160	NBR2	2.56
NM_000265	653361	A_32_P116203	NCF1	2.47
NM_000433	4688	A_23_P138194	NCF2	-8.36
NM_181782	135112	A_23_P156957	NCOA7	-4.82
NM_147130	259197	A_23_P251881	NCR3	3.95
NR_027072	193629	A_32_P111306	NCRNA00189	2.05
NM_014165	29078	A_24_P171983	NDUFAF4	-3.07
NM_198400	4734	A_23_P331379	NEDD4	3.28
NM_006159	4753	A_23_P10025	NELL2	-6.19
NM_018092	81831	A_32_P77989	NETO2	-6.27
NM_024019	63973	A_32_P438767	NEUROG2	-3.83
NM_172387	4772	A_23_P300150	NFATC1	3.98
NM_006163	4778	A_23_P13753	NFE2	-1.48
NM_005596	4781	A_23_P216448	NFIB	3.53
NM_031419	64332	A_23_P212089	NFKBIZ	6.23
NM_014360	26257	A_24_P253293	NKX2-8	-2.69
AK057898	157848	A_23_P402804	NKX6-3	2.33
NM_014932	22871	A_23_P18123	NLGN1	8.47
NM_006681	10874	A_23_P69537	NMU	-16.64
NM_002514	4856	A_23_P82929	NOV	17.49
NM_144603	124056	A_23_P413051	NOXO1	2.15
NM_002517	4861	A_23_P27734	NPAS1	-5
NM_002518	4862	A_23_P218597	NPAS2	-2.58
NM_015392	56654	A_23_P146572	NPDC1	2.15
NM_003489	8204	A_23_P211007	NRIP1	3.89
NM_024958	80023	A_24_P416837	NRSN2	-2.79
NM_004558	4902	A_23_P90359	NRTN	3.16
NM_145807	126147	A_32_P394951	NTN5	5.67
NM_032536	84628	A_23_P423331	NTNG2	2.89
NM_177533	256281	A_23_P414978	NUDT14	-3.25
NM_024923	23225	A_23_P212159	NUP210	-3.59
NM_006187	4940	A_23_P47955	OAS3	4.49
NM_016178	51686	A_32_P226078	OAZ3	2.97
NM_182577	284451	A_32_P337508	ODF3L2	-2.73
NM_032790	84876	A_23_P258837	ORAI1	-3.97
NM_023112	78990	A_24_P124875	OTUB2	-2.69
NM_020459	400961	A_23_P301053	PAIP2B	2.6
NM_002581	5069	A_23_P216742	PAPPA	-8.7
NM_133367	85315	A_23_P214281	PAQR8	-6.74
NM_024615; XM_001128291	79668	A_23_P121898	PARP8	3.7
NM_000280	5080	A_23_P1823	PAX6	3.8
NM_002585	5087	A_23_P62953	PBX1	6.47
NM_002589	5099	A_23_P310921	PCDH7	8.19
NM_020403	5101	A_24_P187218	PCDH9	7.73
NM_032373	84333	A_24_P880043	PCGF5	5.62
NM_005389	5110	A_24_P247608	PCMT1	-2.15
NM_013363	26577	A_23_P57709	PCOLCE2	2.63
NM_002861	5833	A_24_P404245	PCYT2	-3.12
NM_001003683	5136	A_23_P79272	PDE1A	-11.57
NM_006203	5144	A_24_P944519	PDE4D	3.93
NM_001002811	9659	A_23_P200801	PDE4DIP	2.92
NM_018945	27115	A_23_P59338	PDE7B	3.99
NM_002606	5152	A_23_P29096	PDE9A	3.95
NM_002611	5164	A_23_P207517	PDK2	-2.98
NM_014476	27295	A_23_P110403	PDLIM3	13.17
NM_003687	8572	A_23_P144796	PDLIM4	-2.88
NM_006457	10611	A_24_P174641	PDLIM5	-3.33
NM_178140	23037	A_23_P7402	PDZD2	3.48
NM_002617	5192	A_24_P173727	PEX10	-2.89
NM_004567	5210	A_24_P362904	PFKFB4	-5.86
NM_002626	5211	A_23_P29079	PFKL	-3.02
NM_021965	5239	A_23_P10956	PGM5	3
NM_005392	5253	A_23_P502371	PHF2	2.15
NM_007350	22822	A_23_P76450	PHLDA1	4.39
NM_178500	162466	A_23_P49792	PHOSPHO1	-4.27
NM_002638	5266	A_23_P210465	PI3	-6.53
NM_015937	51604	A_24_P40165	PIGT	2.01
NM_181523	5295	A_23_P144980	PIK3R1	4.05
NM_003558	8395	A_32_P465742	PIP5K1B	12.91
NM_006224	5306	A_24_P942354	PITPNA	2.05
NM_004572	5318	A_23_P162466	PKP2	-3.64
NM_003706	8605	A_23_P50508	PLA2G4C	7.22
NM_016619	51316	A_23_P81219	PLAC8	-5.04
NM_006718	5325	A_23_P8175	PLAGL1	-4.73
NM_000930	5327	A_23_P82868	PLAT	-20.57
NM_006225	5333	A_23_P80739	PLCD1	-2.62
NM_133373	113026	A_23_P351757	PLCD3	-4.59
NM_001005473	345557	A_32_P119033	PLCXD3	34.16
NM_172069	130271	A_23_P384748	PLEKHH2	6.48
NM_182943	5352	A_23_P211910	PLOD2	13.92
NM_020353	57088	A_23_P91910	PLSCR4	6.94
NM_025179	5362	A_23_P46618	PLXNA2	-6.76
NM_020911	91584	A_24_P265051	PLXNA4	13.27
NM_001010853	135293	A_32_P86118	PM20D2	-3.28
NM_007254	11284	A_23_P164883	PNKP	-3.76
NM_016218	51426	A_24_P303160	POLK	4.56
NM_006466	10621	A_23_P166122	POLR3F	2.9
NM_013261	10891	A_23_P18447	PPARGC1A	-2.51
NM_006741	5502	A_23_P53417	PPP1R1A	5.62
NM_020416	5522	A_24_P3415	PPP2R2C	2.67
NM_015342	23398	A_23_P110433	PPWD1	3.96
NM_198859	166336	A_24_P152188	PRICKLE2	-5.17
NM_000311	5621	A_23_P109143	PRNP	2.74
NM_152465	147011	A_23_P427148	PROCA1	2.72
NM_000313	5627	A_23_P73114	PROS1	-1.21
NM_024841	79899	A_23_P116512	PRR5L	6.71
NM_005672	8000	A_23_P71379	PSCA	3.44
NM_006742	5681	A_23_P390596	PSKH1	2.22
NM_002793	5689	A_23_P156531	PSMB1	-2.13
NM_002800	5698	A_23_P111000	PSMB9	3.98
NM_004878	9536	A_24_P403417	PTGES	-7.58
NM_000961	5740	A_24_P48723	PTGIS	11.42
NM_003463	7803	A_23_P81770	PTP4A1	3.49
NM_002839	5789	A_23_P252132	PTPRD	-3.26
NM_002845	5797	A_23_P159255	PTPRM	2.93
NM_001015508	29942	A_24_P42446	PURG	8.52
NM_206855	9444	A_24_P940426	QKI	-5.34
NM_001002233	80223	A_23_P31873	RAB11FIP1	3.95
NM_004163	5874	A_23_P107612	RAB27B	3.84
NM_014488	27314	A_24_P167338	RAB30	-2.76
NM_012414	25782	A_24_P127928	RAB3GAP2	3.64
NM_173825	285282	A_23_P158349	RABL3	-2.42
NM_002886	5912	A_24_P123052	RAP2B	3.13
NM_213589	65059	A_24_P929570	RAPH1	-3.56
NM_170672	25780	A_24_P54390	RASGRP3	4.49
NM_001164746	11228	A_24_P407224	RASSF8	6.5
NM_005447	9182	A_24_P199251	RASSF9	5.79
NM_144770	54033	A_23_P342000	RBM11	-5.87
NM_052960	116362	A_24_P165423	RBP7	-3.48
NM_006605	10739	A_23_P254434	RFPL2	7.57
NM_000635	5990	A_23_P502350	RFX2	2.74
NM_001080479	64283	A_24_P177932	RGNEF	-2.64
NM_134427	5998	A_23_P219197	RGS3	2.66
NM_003617	8490	A_23_P46045	RGS5	19
NM_014836	9886	A_24_P158536	RHOBTB1	3.64
NM_014899	22836	A_23_P92710	RHOBTB3	-5.37
NM_021205	58480	A_23_P114814	RHOU	2.85
NM_001031745	158787	A_23_P73667	RIBC1	2.1
NM_015653	26150	A_23_P166526	RIBC2	4.37
NM_015672	85376	A_23_P154962	RIMBP3	4.42
NM_173642	284716	A_23_P349406	RIMKLA	-5.34
NM_003730	8635	A_24_P289471	RNASET2	-7.32
NM_005168	390	A_23_P142849	RND3	5.85
NM_007148	7732	A_23_P107116	RNF112	3.96
NM_024787	79845	A_23_P134744	RNF122	2.1
AK027134	54941	A_24_P472055	RNF125	-8.68
NM_016422	50862	A_23_P139066	RNF141	-2.37
NM_133631	6091	A_24_P77432	ROBO1	-5.36
NM_001007537	387911	A_23_P105886	RP11-45B20.2	5.7
NM_001164154	347688	A_32_P16315	RP11-631M21.2	4.73
NM_015209	23254	A_24_P246573	RP1-21O18.1	2.01
NM_019593	56261	A_23_P353704	RP5-1022P6.2	3.92
NM_016542	51765	A_23_P32414	RP6-213H19.1	-15.14
NM_000328	6103	A_23_P136964	RPGR	4.18
NR_002229	56969	A_23_P108932	RPL23AP32	4.78
NM_004165	6236	A_23_P88849	RRAD	2.51
NM_021244	58528	A_23_P133691	RRAGD	-1.61
NM_001034	6241	A_24_P225616	RRM2	-4.96
NM_080860	89765	A_23_P102950	RSPH1	6.48
NM_138290	154661	A_23_P111724	RUNDC3B	15.86
NM_021634	59350	A_23_P433050	RXFP1	-5.37
NM_080388	140576	A_23_P147918	S100A16	-5.88
NM_005980	6286	A_23_P58266	S100P	-2.14
NM_001400	1901	A_23_P404481	S1PR1	49.64
NM_003775	8698	A_23_P119502	S1PR4	-5.09
NM_002970	6303	A_23_P137016	SAT1	1.19
NM_005505	949	A_23_P369201	SCARB1	-4.45
AF132203	6319	A_32_P231415	SCD	4.2
CB959193; NM_002407	4246	A_23_P139166	SCGB2A1	-1.78
NM_033129	85508	A_24_P117782	SCRT2	-2.75
NM_014654	9672	A_23_P74887	SDC3	-3.56
NM_145168	93517	A_23_P129458	SDR42E1	3.87
NM_152754	223117	A_32_P29118	SEMA3D	5.03
NM_001031702	54437	A_23_P121374	SEMA5B	3.78
NM_020796	57556	A_24_P213478	SEMA6A	-2.34
NM_005410	6414	A_23_P121926	SEPP1	-2.67
NM_001018108	10169	A_24_P313334	SERF2	2.26
NM_001002236	5265	A_23_P218111	SERPINA1	-6.08
NM_005025	5274	A_23_P166929	SERPINI1	4.67
NM_030648	80854	A_23_P80966	SETD7	3.65
NM_006142	2810	A_23_P63254	SFN	-2.92
NM_003012	6422	A_23_P10121	SFRP1	5.66
NM_080743	135295	A_32_P456318	SFRS13B	-3.09
NM_205854	389376	A_24_P149248	SFTA2	-3.86
NM_170693	10110	A_23_P131801	SGK2	2.01
NM_174919	201176	A_23_P401626	SH3D20	-2.98
NM_020145	56904	A_23_P216996	SH3GLB2	-2.97
NM_001040	6462	A_23_P207089	SHBG	2.86
NM_024745	79801	A_32_P96719	SHCBP1	-3.79
NM_138356	90525	A_32_P183904	SHF	-3.25
NM_001080505	152573	A_23_P41476	SHISA3	-20.35
NM_001145205	729993	A_24_P160868	SHISA9	-3.07
NM_014442	27181	A_24_P40001	SIGLEC8	-3.31
NM_001040022	140885	A_23_P210708	SIRPA	2.43
NM_032637	6502	A_23_P156310	SKP2	-3.7
NM_000339	6559	A_23_P77653	SLC12A3	-6.95
AK074236	8170	A_24_P136471	SLC14A2	-6.62
NM_018593	117247	A_24_P98047	SLC16A10	-12.15
NM_213606	387700	A_24_P13024	SLC16A12	-7.68
NM_005074	6568	A_23_P42189	SLC17A1	7.61
NM_005495	10050	A_23_P357270	SLC17A4	-2.61
NM_139319	246213	A_23_P159076	SLC17A8	-1.19
NM_004172	6507	A_23_P250963	SLC1A3	-8.27
NM_153187	6580	A_23_P145569	SLC22A1	-3.15
NM_021977	6581	A_23_P19733	SLC22A3	-2.83
NM_144712	151295	A_23_P28246	SLC23A3	6.05
NM_004277	9481	A_23_P81721	SLC25A27	8.13
NM_201520	399512	A_23_P366726	SLC25A35	2.77
NM_004213	9154	A_23_P14667	SLC28A1	2.03
NM_001040661	222962	A_23_P168551	SLC29A4	-3.24
NM_173508	148641	A_23_P422212	SLC35F3	-4.13
NM_022154	64116	A_23_P41424	SLC39A8	-4.49
NM_000341	6519	A_24_P217234	SLC3A1	-3.42
NM_001012661	6520	A_23_P75811	SLC3A2	-3.56
NM_014585	30061	A_23_P102391	SLC40A1	-2.41
NM_173854	254428	A_24_P122732	SLC41A1	2.01
NM_025257	80736	A_23_P93349	SLC44A4	-4.33
NR_003083	386757	A_24_P15621	SLC6A10P	-6.69
NM_005629	6535	A_23_P159937	SLC6A8	-4.16
NM_182728	23428	A_23_P205489	SLC7A8	-1.86
NM_003048	6549	A_23_P5536	SLC9A2	-4.26
NM_144975	162394	A_23_P402899	SLFN5	10.4
NM_003064	6590	A_23_P91230	SLPI	7.63
BM802662	4093	A_24_P655849	SMAD9	-4.75
NM_006714	10924	A_23_P72117	SMPDL3A	-1.63
NM_004595	6611	A_24_P305764	SMS	-2.16
NM_198501	342527	A_24_P555066	SMTNL2	8.78
NM_003087	6623	A_23_P251293	SNCG	-4.08
NM_025248	80725	A_32_P201530	SNIP	7.32
NM_003098	6640	A_24_P322709	SNTA1	-3.59
BC032648	6650	A_24_P928639	SOLH	-3.34
NM_005686	9580	A_23_P85703	SOX13	-2.75
NM_018419	54345	A_23_P255418	SOX18	-2.63
NM_005634	6658	A_23_P85218	SOX3	-3.89
NM_017508	55553	A_24_P912021	SOX6	5.24
NM_000346	6662	A_23_P26847	SOX9	9.83
NM_007237	11262	A_24_P328504	SP140	2.84
NM_138402	93349	A_23_P337753	SP140L	3.69
NM_017425	53340	A_23_P104876	SPA17	2.32
NM_003116	6676	A_23_P132027	SPAG4	-3.54
NM_145664	100133171	A_24_P305784	SPANXB2	1.58
NM_032417	64648	A_23_P73501	SPANXD	-1.44
NM_004684	8404	A_23_P113351	SPARCL1	4.73
NM_138796	128153	A_23_P346912	SPATA17	5.6
NM_145263	132671	A_24_P345958	SPATA18	2.16
NM_015535	26010	A_23_P131255	SPATS2L	-3.24
NM_020675	57405	A_23_P51085	SPC25	-4.16
NM_001008779	245711	A_23_P425579	SPDYA	4.62
NM_175064	285955	A_24_P414873	SPDYE1	2.89
NM_001004351	441272	A_32_P216734	SPDYE3	3.22
NM_001099435	442590	A_32_P177040	SPDYE5	4.06
NM_001010862	169981	A_24_P494454	SPIN3	3.41
NM_012445	10417	A_23_P121533	SPON2	3.18
NM_018327	55304	A_24_P49260	SPTLC3	18.38
NM_002727	5552	A_23_P86653	SRGN	12.61
NM_005086	8082	A_23_P203920	SSPN	6.47
NM_005668	7903	A_23_P361984	ST8SIA4	5.19
NM_020799	57559	A_23_P385322	STAMBPL1	5.55
NM_139164	134429	A_23_P327519	STARD4	-2.29
NM_007315	6772	A_23_P56630	STAT1	3.37
NM_152999	261729	A_23_P428260	STEAP2	5.47
NM_004226	9262	A_23_P154367	STK17B	-3.36
NM_032944	56164	A_23_P42784	STK31	5.98
NM_018401	55351	A_24_P171690	STK32B	-2.63
NM_020225	56977	A_23_P251364	STOX2	6.18
AK056657	10228	A_23_P331992	STX6	2.06
NM_014178	29091	A_23_P205713	STXBP6	3.1
NM_018837	55959	A_23_P154605	SULF2	2.2
NM_001030019	256979	A_23_P329962	SUNC1	-2.53
NM_145006	203328	A_23_P401076	SUSD3	-4.53
NM_017982	55061	A_24_P259607	SUSD4	5.8
NM_001159677	10492	A_24_P940599	SYNCRIP	-3.36
BC009749	9797	A_24_P592318	TATDN2	-3
NM_005994	6909	A_23_P164451	TBX2	-4.61
NR_024394	154822	A_32_P200303	tcag7.1307	1.41
NM_001083962	6925	A_24_P931428	TCF4	6.1
NM_030752	6950	A_23_P122782	TCP1	-2.88
NM_152772	255394	A_23_P419107	TCP11L2	6.87
NM_024549	79600	A_23_P76402	TCTN1	2.31
NM_003216	7008	A_24_P151582	TEF	2.46
NM_031271	56154	A_23_P123308	TEX15	7.9
AK129833	7980	A_24_P95070	TFPI2	18.53
NM_001135599	7042	A_24_P148261	TGFB2	5.85
NM_198951	7052	A_24_P923251	TGM2	-4.67
NM_031435	83591	A_23_P105382	THAP2	3.46
NM_182529	168451	A_32_P445775	THAP5	4
NM_007112	7059	A_23_P201047	THBS3	6.34
NM_018271	55258	A_23_P259207	THNSL2	2.96
NM_003250	7067	A_23_P207742	THRA	2.59
NM_015204	221981	A_24_P400324	THSD7A	-14.89
NM_004817	9414	A_23_P9293	TJP2	-2.27
NM_015059	83660	A_32_P170406	TLN2	-3.23
NM_003265	7098	A_23_P29922	TLR3	12.17
NM_014220	4071	A_32_P231617	TM4SF1	-9.36
NM_004617	7104	A_23_P252432	TM4SF4	29.5
NM_003273	7108	A_23_P127426	TM7SF2	2.89
NM_020698	57458	A_23_P87853	TMCC3	-3.49
NM_003692	8577	A_24_P274987	TMEFF1	7.71
NM_032021	83935	A_23_P150325	TMEM133	-1.46
NM_173490	134285	A_32_P110390	TMEM171	-3.44
NM_018126	55161	A_24_P191790	TMEM33	-2.5
NM_031442	83604	A_24_P143171	TMEM47	-5.64
NM_001042463	283232	A_23_P332960	TMEM80	2.11
NM_001042590	51754	A_24_P317827	TMEM8B	2.22
NM_147196	259236	A_24_P234462	TMIE	2.91
NM_021992	11013	A_23_P137173	TMSB15A	-2.11
NM_021109	7114	A_24_P374516	TMSB4X	3.1
NM_000594	7124	A_23_P376488	TNF	9.43
NM_207381	388121	A_32_P59010	TNFAIP8L3	2.58
NM_032945	8771	A_23_P218646	TNFRSF6B	7.23
NM_003279	7125	A_23_P131825	TNNC2	3.08
NM_001146188	27324	A_23_P54681	TOX3	4.89
AF010315	9537	A_23_P368028	TP53I11	-3.22
NM_001003395	7164	A_23_P31143	TPD52L1	-7.3
NM_001018004	7168	A_23_P391586	TPM1	2.62
NM_000547	7173	A_24_P257224	TPO	6.86
NM_016140	51673	A_23_P26386	TPPP3	7.93
NM_147686	10758	A_23_P110879	TRAF3IP2	-2.32
NM_152402	133022	A_23_P18518	TRAM1L1	3.92
NM_015271	23321	A_23_P213141	TRIM2	-6.4
NM_006074	10346	A_24_P172481	TRIM22	-1.55
NM_033228	373	A_23_P167384	TRIM23	4.73
NM_130390	53840	A_23_P124190	TRIM34	6.62
NM_001003818	117854	A_23_P33673	TRIM6	-28.67
NR_002720	7221	A_23_P169873	TRPC2	-3.21
NM_005786	10194	A_23_P27381	TSHZ1	3.81
NM_031945	83882	A_24_P213643	TSPAN10	-2.68
NM_001100917	144448	A_23_P2322	TSPAN19	9.62
NM_178562	340348	A_24_P365901	TSPAN33	2.24
AK055659	10098	A_23_P61886	TSPAN5	2.98
NM_003312	7263	A_23_P29248	TST	2.05
NM_145170	118491	A_23_P326931	TTC18	5.69
NM_031421	83538	A_23_P73150	TTC25	6.9
NM_133378	7273	A_23_P85269	TTN	2.46
NM_000371	7276	A_23_P130333	TTR	6.67
NM_018943	51807	A_24_P160104	TUBA8	2.1
NM_024803	79861	A_23_P95851	TUBAL3	-3.84
NR_002323	55000	A_23_P68868	TUG1	3.75
NM_030810	81567	A_23_P168229	TXNDC5	-2.09
NM_178130	347736	A_23_P212672	TXNDC6	2.23
NM_006472	10628	A_23_P97700	TXNIP	3.75
NM_001008224	55075	A_23_P360340	UACA	5.58
BC064492	7329	A_24_P227993	UBE2I	2.4
NM_016021	51465	A_23_P214185	UBE2J1	-2.06
NM_152376	127733	A_23_P85664	UBXN10	8.74
AK026668	127933	A_32_P84389	UHMK1	3.8
NM_013282	29128	A_23_P208880	UHRF1	-2.25
NM_001080421	23025	A_23_P365494	UNC13A	2.84
AY358789	100131826	A_24_P934008	UNQ3028	-3.71
NM_006952	7348	A_24_P200219	UPK1B	-11.3
NM_001008563	10868	A_23_P217028	USP20	2.25
AB040886	57602	A_23_P352957	USP36	2.65
NM_004385	1462	A_23_P144959	VCAN	4.24
NM_001017535	7421	A_23_P162589	VDR	-7.46
NM_182566	284013	A_23_P55356	VMO1	2.17
NM_052875	112936	A_23_P52903	VPS26B	-3.12
NM_019086	54621	A_23_P72059	VSIG10	2.02
NM_016485	51534	A_23_P42368	VTA1	-2.16
NM_024626	79679	A_23_P518	VTCN1	2.65
NM_138345	90113	A_24_P152881	VWA5B2	-2.89
NM_182504	135886	A_23_P418274	WBSCR28	6.22
NM_001012361	114987	A_24_P6674	WDR31	4.62
NM_001164496	55779	A_23_P110090	WDR52	5.37
NM_019069	54554	A_23_P92184	WDR5B	2.68
NM_178821	164781	A_23_P28466	WDR69	-6.32
BC009627	84305	A_24_P917612	WIBG	2.04
NM_004185	7482	A_23_P138352	WNT2B	-2.24
NM_006522	7475	A_23_P119916	WNT6	7.78
NM_004625	7476	A_23_P258410	WNT7A	-6.42
NM_015253	23302	A_24_P942493	WSCD1	-17.56
NM_007235	11260	A_23_P340722	XPOT	2.83
NM_022550	7518	A_23_P122174	XRCC4	3.79
NM_175907	284273	A_23_P375476	ZADH2	3.23
NM_014797	9841	A_23_P134147	ZBTB24	-2.39
NM_198581	376940	A_24_P826348	ZC3H6	4.83
NM_015144	23174	A_24_P176484	ZCCHC14	2.6
NM_017984	55063	A_23_P70897	ZCWPW1	2.72
NM_020923	57683	A_32_P68504	ZDBF2	7.2
NM_153746	79683	A_23_P250619	ZDHHC14	-6.72
NM_012082	23414	A_24_P273857	ZFPM2	-3.35
NM_031449	83637	A_24_P29686	ZMIZ2	3
NM_015896	51364	A_23_P29663	ZMYND10	3.22
BC035579	163227	A_32_P48244	ZNF100	-5.42
NM_007147	7728	A_23_P332374	ZNF175	4.53
AK026215	7756	A_24_P116766	ZNF207	6.56
NM_001032374	7769	A_23_P218434	ZNF226	3.2
AF024709	7571	A_24_P935125	ZNF23	4.06
NM_017661	54816	A_23_P14708	ZNF280D	4.19
NM_020727	49854	A_24_P339869	ZNF295	3.24
NM_003420	7584	A_23_P211785	ZNF35	7.36
NM_021632	59348	A_23_P78458	ZNF350	-5.03
NM_001080411	163059	A_23_P27649	ZNF433	-3.67
NM_052852	90649	A_24_P100016	ZNF486	-2.56
NM_032679	84765	A_23_P309207	ZNF577	-5.23
NM_024840	79898	A_24_P173234	ZNF613	-4.07
NM_023074	65251	A_23_P208208	ZNF649	-5.87
NM_001083956	79027	A_23_P345081	ZNF655	3.59
NM_138286	148213	A_32_P167904	ZNF681	-4.9
NM_033196	91120	A_24_P944588	ZNF682	3.35
NM_001033723	619279	A_24_P230074	ZNF704	4.61
AK131429	285989	A_32_P542928	ZNF789	4.13
NM_147128	223082	A_23_P325017	ZNRF2	4.66
NM_020883	57643	A_23_P383118	ZSWIM5	3.08
Gene signature issued from gene expression analysis on Agilent microarrays.

## Sheet: Table S1B
Table S1B: Gene Ontology information on the 998 gene signature
GO term	Process Description	P-value	FDR q-value	Enrichment (N, B, n, b)
GO:0006508	proteolysis	2.93E-6	1.88E-2	7.50 (916,47,26,10)
GO:0015914	phospholipid transport	3.92E-6	1.26E-2	101.78 (916,9,3,3)
GO:0015748	organophosphate ester transport	8.18E-6	1.75E-2	83.27 (916,11,3,3)
GO:0010875	positive regulation of cholesterol efflux	1.43E-5	2.29E-2	305.33 (916,2,3,2)
GO:0010887	negative regulation of cholesterol storage	1.43E-5	1.84E-2	305.33 (916,2,3,2)
GO:0033700	phospholipid efflux	1.43E-5	1.53E-2	305.33 (916,2,3,2)
GO:0097035	regulation of membrane lipid distribution	3.66E-5	3.35E-2	11.39 (916,6,67,5)
GO:0034204	lipid translocation	4.08E-5	3.27E-2	229.00 (916,4,2,2)
GO:0045332	phospholipid translocation	4.08E-5	2.91E-2	229.00 (916,4,2,2)
GO:0071402	cellular response to lipoprotein particle stimulus	4.13E-5	2.65E-2	203.56 (916,3,3,2)
GO:0032365	intracellular lipid transport	4.13E-5	2.4E-2	203.56 (916,3,3,2)
GO:0032367	intracellular cholesterol transport	4.13E-5	2.2E-2	203.56 (916,3,3,2)
GO:0032366	intracellular sterol transport	4.13E-5	2.03E-2	203.56 (916,3,3,2)
GO:0010745	negative regulation of macrophage derived foam cell differentiation	4.13E-5	1.89E-2	203.56 (916,3,3,2)
GO:0010874	regulation of cholesterol efflux	4.13E-5	1.76E-2	203.56 (916,3,3,2)
GO:0033344	cholesterol efflux	4.13E-5	1.65E-2	203.56 (916,3,3,2)
GO:0007186	G-protein coupled receptor signaling pathway	5.89E-5	2.22E-2	1.30 (916,47,704,47)
GO:0006869	lipid transport	1.06E-4	3.77E-2	45.80 (916,20,3,3)
GO:0032373	positive regulation of sterol transport	1.21E-4	4.09E-2	152.67 (916,4,3,2)
GO:0032376	positive regulation of cholesterol transport	1.21E-4	3.88E-2	152.67 (916,4,3,2)
GO:0010743	regulation of macrophage derived foam cell differentiation	1.21E-4	3.7E-2	152.67 (916,4,3,2)
GO:0010885	regulation of cholesterol storage	1.21E-4	3.53E-2	152.67 (916,4,3,2)
GO:0010888	negative regulation of lipid storage	1.21E-4	3.38E-2	152.67 (916,4,3,2)
GO:0055091	phospholipid homeostasis	1.21E-4	3.23E-2	152.67 (916,4,3,2)
GO:0006996	organelle organization	1.68E-4	4.31E-2	2.46 (916,105,85,24)
GO:0032371	regulation of sterol transport	2.56E-4	6.31E-2	122.13 (916,5,3,2)
GO:0032374	regulation of cholesterol transport	2.56E-4	6.07E-2	122.13 (916,5,3,2)
GO:0071825	protein-lipid complex subunit organization	2.56E-4	5.86E-2	122.13 (916,5,3,2)
GO:0071827	plasma lipoprotein particle organization	2.56E-4	5.65E-2	122.13 (916,5,3,2)
GO:0043691	reverse cholesterol transport	2.56E-4	5.47E-2	122.13 (916,5,3,2)
GO:0031340	positive regulation of vesicle fusion	2.96E-4	6.12E-2	17.96 (916,3,51,3)
GO:0051056	regulation of small GTPase mediated signal transduction	3.14E-4	6.29E-2	4.98 (916,24,69,9)
GO:0007165	signal transduction	4.08E-4	7.92E-2	1.04 (916,256,882,256)
GO:0031396	regulation of protein ubiquitination	4.1E-4	7.72E-2	6.70 (916,10,82,6)
GO:0071704	organic substance metabolic process	4.15E-4	7.59E-2	1.87 (916,408,30,25)
GO:0015711	organic anion transport	4.25E-4	7.57E-2	31.59 (916,29,3,3)
GO:0010883	regulation of lipid storage	4.69E-4	8.12E-2	101.78 (916,6,3,2)
GO:0055081	anion homeostasis	4.69E-4	7.91E-2	101.78 (916,6,3,2)
GO:0030032	lamellipodium assembly	5.26E-4	8.64E-2	76.33 (916,4,6,2)
GO:0097581	lamellipodium organization	5.26E-4	8.42E-2	76.33 (916,4,6,2)
GO:0061024	membrane organization	5.41E-4	8.46E-2	3.59 (916,34,90,12)
GO:0009593	detection of chemical stimulus	5.52E-4	8.42E-2	61.07 (916,3,10,2)
GO:0044281	small molecule metabolic process	6.28E-4	9.36E-2	5.37 (916,91,15,8)
GO:0043087	regulation of GTPase activity	6.28E-4	9.15E-2	5.22 (916,23,61,8)
GO:0040011	locomotion	6.51E-4	9.28E-2	1.18 (916,77,754,75)
GO:1901564	organonitrogen compound metabolic process	6.52E-4	9.09E-2	2.42 (916,252,27,18)
GO:0006820	anion transport	6.56E-4	8.95E-2	27.76 (916,33,3,3)
GO:0016477	cell migration	6.84E-4	9.14E-2	1.20 (916,65,754,64)
GO:0071840	cellular component organization or biogenesis	7.57E-4	9.91E-2	1.69 (916,274,85,43)
GO:0051050	positive regulation of transport	7.61E-4	9.76E-2	9.77 (916,67,7,5)
GO:1902652	secondary alcohol metabolic process	7.68E-4	9.65E-2	87.24 (916,7,3,2)
GO:0008203	cholesterol metabolic process	7.68E-4	9.47E-2	87.24 (916,7,3,2)
GO:0016125	sterol metabolic process	7.68E-4	9.29E-2	87.24 (916,7,3,2)
GO:0031398	positive regulation of protein ubiquitination	9.86E-4	1.17E-1	5.13 (916,8,134,6)
Eran Eden*, Roy Navon*, Israel Steinfeld, Doron Lipson and Zohar Yakhini. "GOrilla: A Tool For Discovery And Visualization of Enriched GO Terms in Ranked Gene Lists", BMC Bioinformatics 2009, 10:48.
Eran Eden, Doron Lipson, Sivan Yogev, Zohar Yakhini. "Discovering Motifs in Ranked Lists of DNA sequences", PLoS Computational Biology, 3(3):e39, 2007.
GORILLA (Gene Ontology enRIchment anaLysis and visuaLizAtion tool)
'P-value' is the enrichment p-value computed according to the mHG or HG model. This p-value is not corrected for multiple testing of 1447 GO terms.
'FDR q-value' is the correction of the above p-value for multiple testing using the Benjamini and Hochberg (1995) method.
Namely, for the ith term (ranked according to p-value) the FDR q-value is (p-value * number of GO terms) / i.
Enrichment (N, B, n, b) is defined as follows:
N - is the total number of genes
B - is the total number of genes associated with a specific GO term
n - is the number of genes in the top of the user's input list or in the target set when appropriate
b - is the number of genes in the intersection
Enrichment = (b/n) / (B/N)

## Sheet: Table S2A
Table S2A: List of the 34 upregulated hits from the image-based high-content screen
Accession number	Gene ID	Gene Name
NM_000381; NM_033290	4281	midline 1(MID1)
NM_000927	5243	ATP binding cassette subfamily B member 1(ABCB1)
NM_001001552	93273	LEM domain containing 1(LEMD1)
NM_001004351	441272	speedy/RINGO cell cycle regulator family member E3(SPDYE3)
NM_001017402	3914	laminin subunit beta 3(LAMB3)
NM_001040217	55793	family with sequence similarity 63 member A(FAM63A)
NM_001099435	442590	speedy/RINGO cell cycle regulator family member E5(SPDYE5)
NM_001481	2622	growth arrest specific 8(GAS8)
NM_001621	196	aryl hydrocarbon receptor(AHR)
NM_001963	1950	epidermal growth factor(EGF)
NM_002210	3685	integrin subunit alpha V(ITGAV)
NM_002386	4157	melanocortin 1 receptor(MC1R)
NM_002440	4438	mutS homolog 4(MSH4)
NM_003519	8340	histone cluster 1 H2B family member l(HIST1H2BL)
NM_003558	8395	phosphatidylinositol-4-phosphate 5-kinase type 1 beta(PIP5K1B)
NM_004213	9154	solute carrier family 28 member 1(SLC28A1)
NM_004684	8404	SPARC like 1(SPARCL1)
NM_005347	3309	heat shock protein family A (Hsp70) member 5(HSPA5)
NM_006605	10739	ret finger protein like 2(RFPL2)
NM_006742	5681	protein serine kinase H1(PSKH1)
NM_014476	27295	PDZ and LIM domain 3(PDLIM3)
NM_014805	9852	EPM2A interacting protein 1(EPM2AIP1)
NM_015342	23398	peptidylprolyl isomerase domain and WD repeat containing 1(PPWD1)
NM_020727	49854	zinc finger and BTB domain containing 21(ZBTB21)
NM_021109	7114	thymosin beta 4, X-linked(TMSB4X)
NM_032944	56164	serine/threonine kinase 31(STK31)
NM_145019	220108	family with sequence similarity 124 member A(FAM124A)
NM_145111	221786	family with sequence similarity 200 member A(FAM200A)
NM_181342	51661	FK506 binding protein 7(FKBP7)
NM_182566	284013	vitelline membrane outer layer 1 homolog(VMO1)
NM_203403	286343	leucine rich adaptor protein 1 like(LURAP1L)
NR_003713	728613	programmed cell death 6 pseudogene(LOC728613)
XM_001715987	54553	uncharacterized protein DKFZP434I0714(DKFZP434I0714)
XM_926406	643037	chromosome 11 open reading frame 97(C11orf97)

## Sheet: Table S2B
Table S2B: Gene Ontology information about the 34 hits issued from the image-based screen
GO term	Description	Count	%	P Value	Genes ID	FDR
GO:0070371	ERK1 and ERK2 cascade	2	5.88	0.0351	3685, 1950	35.92
GO:0035987	endodermal cell differentiation	2	5.88	0.0394	3685, 3914	39.39
GO:0050840	extracellular matrix binding	2	5.88	0.0407	3685, 8404	36.49
GO:0045859	regulation of protein kinase activity	2	5.88	0.0494	442590, 441272	46.78
GO:0001568	blood vessel development	2	5.88	0.0551	3685, 196	50.59
GO:0000413	protein peptidyl-prolyl isomerization	2	5.88	0.0621	51661, 23398	54.97
GO:0003755	peptidyl-prolyl cis-trans isomerase activity	2	5.88	0.0710	51661, 23398	55.23
GO:0031093	platelet alpha granule lumen	2	5.88	0.0728	7114, 1950	54.58
GO:0031625	ubiquitin protein ligase binding	3	8.82	0.0765	3309, 4157, 4281	58.03
GO:0070062	extracellular exosome	8	23.52	0.0784	3685, 8340, 284013, 5243, 8404, 55793, 3309, 1950	57.38
GO:0005524	ATP binding	6	17.64	0.0851	5243, 5681, 3309, 56164, 4438, 8395	62.09
The functional annotation chart report was extracted by using DAVID Bioinformatics Resources 6.8.

## Sheet: Table S3
Table S3: Clinical data of patients recruited for tissue microarray (TMA)
#	TMA Order	Dis ID	DOB	Benign 0/ Cancer 1	FKBP7	Months to Recurrence	Follow up after surgery (nonrecurrent 0-recurrent 1)	Diagnosis date	Date of surgery/	Last follow up/ Date of PSA recurrence	PSA at Day x	Biopsy total Gleason score	RPR total Gleason Score	Extracapsular invasion (0 &1)	Seminal vesicles (0 &1)	Positive margins?	Positive cores/total cores	Main Treatment; no Tr ( 0) NHT (1) NHT/TAX(2)	No Metastasis ( 0) LN Metastasis ( 1 ) distant Metastasis (2)	Pathological staging ( 1-7)
									radiation
1	1	3722	1940-05-18	0	1	120	0	2003-12-17	2004-01-20	2014-01-20	4.7	7	6	0	0	1	0.3	0	0	4
2	2	3722	1940-05-18	0	1	120	0	2003-12-17	2004-01-20	2014-01-20	4.7	7	6	0	0	1	0.3	0	0	4
3	3	3666	1952-02-25	0	1	49.97	0	2003-10-17	2004-01-20	2008-03-19	7.8	6	6	0	0	0	0.3	0	0	4
4	4	3666	1952-02-25	0	1	49.97	0	2003-10-17	2004-01-20	2008-03-19	7.8	6	6	0	0	0	0.3	0	0	4
5	5	3641	1938-05-29	0	1	80.47	0	2003-09-30	2004-01-22	2010-10-06	7.43	7	6	0		0	0.3	0	0	4
6	6	3641	1938-05-29	1	1	80.47	0	2003-09-30	2004-01-22	2010-10-06	7.43	7	6	0		0	0.3	0	0	4
7	7	3748	1934-06-21	0	0	61.17	0	2003-05-29	2004-01-27	2009-03-02	8	6	6	0	0	1	0.4	0	0	4
8	8	3748	1934-06-21	1	0	61.17	0	2003-05-29	2004-01-27	2009-03-02	8	6	6	0	0	1	0.4	0	0	4
9	9	3669	1933-04-01	1	0	98.43	0	2003-10-21	2004-01-29	2012-04-12	6.1	7	6	0	0	0	0.6	0	0	4
10	10	3669	1933-04-01	0	0	98.43	0	2003-10-21	2004-01-29	2012-04-12	6.1	7	6	0	0	0	0.6	0	0	4
11	11	3651	1937-06-25	1	1	89.47	0	2003-10-08	2004-01-30	2011-07-14	6	7	7	0	0	0	0.4	0	0	2
12	12	3651	1937-06-25	1	1	89.47	0	2003-10-08	2004-01-30	2011-07-14	6	7	7	0	0	0	0.4	0	0	2
13	13	3699	1950-02-08	1	1		0	2003-11-20	2004-03-04	2004-03-04	8.15	6	7	0	0	0	0.9	0	0	4
14	14	3699	1950-02-08	1	1		0	2003-11-20	2004-03-04	2004-03-04	8.15	6	7	0	0	0	0.9	0	0	4
15	15	3699	1950-02-08	0	0		0	2003-11-20	2004-03-04	2004-03-04	8.15	6	7	0	0	0	0.9	0	0	4
16	16	3699	1950-02-08	0	0		0	2003-11-20	2004-03-04	2004-03-04	8.15	6	7	0	0	0	0.9	0	0	4
17	17	3846	1939-02-16	1	1	30.4	1	2004-03-16	2004-05-06	2006-11-18	24.1	7	9	1	1	1	0.5	0	0	5
18	18	3846	1939-02-16	1	1	30.4	1	2004-03-16	2004-05-06	2006-11-18	24.1	7	9	1	1	1	0.5	0	0	5
19	19	3846	1939-02-16	1	1	30.4	1	2004-03-16	2004-05-06	2006-11-18	24.1	7	9	1	1	1	0.5	0	0	5
20	20	3846	1939-02-16	1	1	30.4	1	2004-03-16	2004-05-06	2006-11-18	24.1	7	9	1	1	1	0.5	0	0	5
21	21	3788	1948-11-30	1	0	90.37	0	2004-03-03	2004-05-25	2011-12-06	6.9	7	7	0	0	1	0.5	0	0	4
22	22	3788	1948-11-30	1	0	90.37	0	2004-03-03	2004-05-25	2011-12-06	6.9	7	7	0	0	1	0.5	0	0	4
23	23	3836	1961-11-18	1	2	120.87	0	2004-04-22	2004-05-27	2014-06-23	9	7	7	0	0	0	0.4	0	0	4
24	24	3836	1961-11-18	1	2	120.87	0	2004-04-22	2004-05-27	2014-06-23	9	7	7	0	0	0	0.4	0	0	4
25	25	3822	1935-05-26	0	0	113	1	2004-04-07	2004-06-01	2013-10-31	16	8	9	1	1	1	0.7	0	0	6
26	26	3822	1935-05-26	1	0	113	1	2004-04-07	2004-06-01	2013-10-31	16	8	9	1	1	1	0.7	0	0	6
27	27	3775	1952-10-06	1	3		0	2004-02-19	2004-07-27		6.5	6	6	0	0	1	0.4	0	0	4
28	28	3775	1952-10-06	1	3		0	2004-02-19	2004-07-27		6.5	6	6	0	0	1	0.4	0	0	4
29	29	3835	1941-12-14	1	0	85.07	0	2004-04-22	2004-08-11	2011-09-13	5.2	7	6	0	0	0	0.3	0	0	4
30	30	3835	1941-12-14	1	1	85.07	0	2004-04-22	2004-08-11	2011-09-13	5.2	7	6	0	0	0	0.3	0	0	4
31	31	3866	1934-02-02	1	1	97.6	0	2004-05-27	2004-08-11	2012-09-29	1.7	6	6	0	0	0	0.5	0	0	4
32	32	3866	1934-02-02	1	3	97.6	0	2004-05-27	2004-08-11	2012-09-29	1.7	6	6	0	0	0	0.5	0	0	4
33	33	3964	1947-01-09	1	2		0		2004-09-23	2004-09-23			7	1	0	1		0	0	5
34	34	3964	1947-01-09	1	2		0		2004-09-23	2004-09-23			7	1	0	1		0	0	5
35	35	3964	1947-01-09	0	0		0		2004-09-23	2004-09-23			7	1	0	1		0	0	5
36	36	3964	1947-01-09	0	0		0		2004-09-23	2004-09-23			7	1	0	1		0	0	5
37	37	3862	1954-09-07	1	1	85.33	0	2004-06-23	2004-10-05	2011-11-15	5.3	7	6	0	0	0	0.3	0	0	4
38	38	3862	1954-09-07	0	2	85.33	0	2004-06-23	2004-10-05	2011-11-15	5.3	7	6	0	0	0	0.3	0	0	4
39	39	3862	1954-09-07	0	1	85.33	0	2004-06-23	2004-10-05	2011-11-15	5.3	7	6	0	0	0	0.3	0	0	4
40	40	3862	1954-09-07	0	1	85.33	0	2004-06-23	2004-10-05	2011-11-15	5.3	7	6	0	0	0	0.3	0	0	4
41	41	3849	1938-07-31	0	0	121.17	0	2004-05-12	2004-10-12	2014-11-17	6.5	7	7	0	0	0	0.3	0	0	4
42	42	3849	1938-07-31	0	0	121.17	0	2004-05-12	2004-10-12	2014-11-17	6.5	7	7	0	0	0	0.3	0	0	4
43	43	3678	1940-01-29	1	2	12.8	1	2003-10-01	2004-10-14	2005-11-08	6.3	6	8	1	1	1	0.3	0	0	6
44	44	3678	1940-01-29	1	2	12.8	1	2003-10-01	2004-10-14	2005-11-08	6.3	6	8	1	1	1	0.3	0	0	6
45	45	3861	1934-05-15	1	0	79.7	0	2004-05-20	2004-10-19	2011-06-10	5.1	6	6	1		1	0.1	0	0	5
46	46	3861	1934-05-15	1	0	79.7	0	2004-05-20	2004-10-19	2011-06-10	5.1	6	6	1		1	0.1	0	0	5
47	47	3891	1948-01-04	1	1	98.73	1	2004-06-18	2004-11-09	2013-02-01		7	7	0	0	0	0.5	0	0	2
48	48	3891	1948-01-04	1	2	98.73	1	2004-06-18	2004-11-09	2013-02-01		7	7	0	0	0	0.5	0	0	2
49	49	3750	1936-12-18	1	3	60.97	0	2004-01-29	2004-04-13	2009-05-12	15.6	7	9	1	1	0	0.4	0	0	5
50	50	3750	1936-12-18	1	3	60.97	0	2004-01-29	2004-04-13	2009-05-12	15.6	7	9	1	1	0	0.4	0	0	5
51	51	3641	1938-05-29	0	0	80.47	0	2003-09-30	2004-01-22	2010-10-06	7.43	7	6	0		0	0.3	0	0	4
52	52	3641	1938-05-29	0	0	80.47	0	2003-09-30	2004-01-22	2010-10-06	7.43	7	6	0		0	0.3	0	0	4
53	53	3886	1949-05-31	1	0	79.6	0	2004-06-17	2004-09-23	2011-05-11	8.2	7	7	0	0	0	0.1	0	0	4
54	54	3886	1949-05-31	1	1	79.6	0	2004-06-17	2004-09-23	2011-05-11	8.2	7	7	0	0	0	0.1	0	0	4
55	55	4029	1938-01-13	0	2	52.2	1	2004-03-31	2004-12-02	2009-04-08	6	6	6	0	0	0	0.5	0	0	4
56	56	4029	1938-01-13	0	0	52.2	1	2004-03-31	2004-12-02	2009-04-08	6	6	6	0	0	0	0.5	0	0	4
57	57	4043	1933-11-20	1	0		1	2004-12-14	2005-04-19		7.02	7	7	0	0	1	0.1	0	0	4
58	58	4043	1933-11-20	1	0		1	2004-12-14	2005-04-19		7.02	7	7	0	0	1	0.1	0	0	4
59	59	4162	1939-10-16	1	2	85.13	0	2005-04-26	2005-07-05	2012-08-09	8.1	8	7	0	0	0	1	0	0	4
60	60	4162	1939-10-16	1	2	85.13	0	2005-04-26	2005-07-05	2012-08-09	8.1	8	7	0	0	0	1	0	0	4
61	61	4235	1942-06-11	1	3	105.8	0	2005-04-25	2005-07-12	2014-05-06	7.6	7	7	0	0	1	0.5	0	0	4
62	62	4235	1942-06-11	1	3	105.8	0	2005-04-25	2005-07-12	2014-05-06	7.6	7	7	0	0	1	0.5	0	0	4
63	63	4211	1949-09-24	1	2	78.07	1	2005-06-14	2005-08-30	2012-03-02	14	7	7	0	0	1	0.5	0	0	4
64	64	4211	1949-09-24	1	1	78.07	1	2005-06-14	2005-08-30	2012-03-02	14	7	7	0	0	1	0.5	0	0	4
65	65	4237	1946-08-17	1	1	41.8	0	2005-07-14	2005-10-06	2009-03-30	8.3	7	7	0	0	0	0.4	0	0	4
66	66	4237	1946-08-17	0	x	41.8	0	2005-07-14	2005-10-06	2009-03-30	8.3	7	7	0	0	0	0.4	0	0	4
67	67	4171	1948-02-11	1	3		0	2005-05-05	2005-10-11			7	7	1	0	0	0.5	0	0	5
68	68	4171	1948-02-11	1	3		0	2005-05-05	2005-10-11			7	7	1	0	0	0.5	0	0	5
69	69	4257	1948-12-21	1	2	100.67	0	2005-08-09	2005-11-24	2014-04-14	6.5	6	7	0	0	0	0.5	0	0	4
70	70	4257	1948-12-21	1	2	100.67	0	2005-08-09	2005-11-24	2014-04-14	6.5	6	7	0	0	0	0.5	0	0	4
71	71	3936	1938-10-17	1	2	123.13	0	2004-08-31	2005-01-06	2015-04-10	6.06	7	7	1	0	0	0.3	0	0	5
72	72	3936	1938-10-17	1	2	123.13	0	2004-08-31	2005-01-06	2015-04-10	6.06	7	7	1	0	0	0.3	0	0	5
73	73	4040	1942-05-29	1	2	39.97	0	2004-12-13	2005-03-24	2008-07-23	26	7	7	1	0	1	0.4	0	0	5
74	74	4040	1942-05-29	1	2	39.97	0	2004-12-13	2005-03-24	2008-07-23	26	7	7	1	0	1	0.4	0	0	5
75	75	4186	1939-09-20	1	3	116.87	1	2005-05-18	2005-09-08	2015-06-04	6.8	7	7	1	0	1	0.5	1	2	5
76	76	4186	1939-09-20	1	x	116.87	1	2005-05-18	2005-09-08	2015-06-04	6.8	7	7	1	0	1	0.5	1	2	5
77	77	4384	1938-01-12	1	1	93.77	0	2005-12-20	2006-02-28	2013-12-23	12.6	6	7	0	0	1	0.5	0	0	2
78	78	4384	1938-01-12	1	1	93.77	0	2005-12-20	2006-02-28	2013-12-23	12.6	6	7	0	0	1	0.5	0	0	2
79	79	4340	1939-12-19	1	1		0	2005-11-08	2006-02-28			6	7	0	0	0	0.9	0	0	4
80	80	4340	1939-12-19	1	2		0	2005-11-08	2006-02-28			6	7	0	0	0	0.9	0	0	4
81	81	4511	1934-05-25	1	0	81.37	1	2006-01-11	2006-03-24	2013-01-05	13	7	7	0	0	1	0.5	0	0	4
82	82	4511	1934-05-25	1	1	81.37	1	2006-01-11	2006-03-24	2013-01-05	13	7	7	0	0	1	0.5	0	0	4
83	83	4471	1942-12-02	1	3	98.83	0	2006-02-21	2006-04-20	2014-07-15	8.95	8	8	0	0	0	0.3	0	0	4
84	84	4471	1942-12-02	0	3	98.83	0	2006-02-21	2006-04-20	2014-07-15	8.95	8	8	0	0	0	0.3	0	0	4
85	85	4594	1942-09-08	1	1	95.77	0	2006-06-14	2006-07-04	2014-06-27	26	7	7	1	0	1		0	0	5
86	86	4594	1942-09-08	1	3	95.77	0	2006-06-14	2006-07-04	2014-06-27	26	7	7	1	0	1		0	0	5
87	87	4572	1933-05-06	1	x	50.5	1	2006-05-25	2006-07-13	2010-09-28	8.9	9	9	1	1	0	0.3	1	0	6
88	88	4572	1933-05-06	1	2	50.5	1	2006-05-25	2006-07-13	2010-09-28	8.9	9	9	1	1	0	0.3	1	0	6
89	89	4530	1958-09-16	1	2	28.63	0	2006-04-12	2006-07-26	2008-12-15	8.8	7	7	0	0	1	0.3	0	0	3
90	90	4530	1958-09-16	1	2	28.63	0	2006-04-12	2006-07-26	2008-12-15	8.8	7	7	0	0	1	0.3	0	0	3
91	91	3596	1941-08-07	1	0		0		2003-08-13	2003-08-13	2.85		7	0	0	0		0	0	4
92	92	3596	1941-08-07	1	1		0		2003-08-13	2003-08-13	2.85		7	0	0	0		0	0	4
93	93	3596	1941-08-07	1	0		0		2003-08-13	2003-08-13	2.85		7	0	0	0		0	0	4
94	94	3596	1941-08-07	1	1		0		2003-08-13	2003-08-13	2.85		7	0	0	0		0	0	4
95	95	4624	1939-08-12	1	3		0	2006-07-19	2006-10-04		7.1	7	7	0	0	1	0.6	0	0	4
96	96	4624	1939-08-12	1	x		0	2006-07-19	2006-10-04		7.1	7	7	0	0	1	0.6	0	0	4
97	97	4533	1945-07-25	0	1	72.23	0	2006-04-19	2006-06-13	2012-06-20	4.3	6	7	0	0	0	0.3	0	0	4
98	98	4533	1945-07-25	0	1	72.23	0	2006-04-19	2006-06-13	2012-06-20	4.3	6	7	0	0	0	0.3	0	0	4
99	99	4123	1941-02-15	0	2	92.3	0	2005-02-25	2006-06-15	2014-02-24	9	8	7	0	0	1		0	0	4
100	100	4123	1941-02-15	0	2	92.3	0	2005-02-25	2006-06-15	2014-02-24	9	8	7	0	0	1		0	0	4
101	101	4617	1954-06-18	1	2		0	2006-07-13	2005-10-04		6.5	6	6	0	0	1	0.4	0	0	4
102	102	4617	1954-06-18	1	1		0	2006-07-13	2005-10-04		6.5	6	6	0	0	1	0.4	0	0	4
103	103	4544	1933-10-25	0	1	45.93	0	2006-05-02	2006-06-15	2010-04-13	4.05	7	7	1	1	1	0.6	0	0	5
104	104	4544	1933-10-25	0	2	45.93	0	2006-05-02	2006-06-15	2010-04-13	4.05	7	7	1	1	1	0.6	0	0	5
105	105	4700	1940-11-10	1	3	35.5	0	2006-10-26	2007-01-02	2009-12-17	7.7	9	9	1	0	0	0.5	0	0	5
106	106	4700	1940-11-10	1	3	35.5	0	2006-10-26	2007-01-02	2009-12-17	7.7	9	9	1	0	0	0.5	0	0	5
107	107	4700	1940-11-10	1	3	35.5	0	2006-10-26	2007-01-02	2009-12-17	7.7	9	9	1	0	0	0.5	0	0	5
108	108	4700	1940-11-10	1	3	35.5	0	2006-10-26	2007-01-02	2009-12-17	7.7	9	9	1	0	0	0.5	0	0	5
109	109	4783	1947-10-07	1	3	36.73	0	2006-10-11	2007-01-09	2010-02-01	5.7	7	7	0	0	0	0.4	0	0	4
110	110	4783	1947-10-07	1	2	36.73	0	2006-10-11	2007-01-09	2010-02-01	5.7	7	7	0	0	0	0.4	0	0	4
111	111	4812	1942-07-23	1	0		0	2007-01-31	2007-02-01	2007-02-01		6	7	0	0	1		0	0	2
112	112	4812	1942-07-23	1	1		0	2007-01-31	2007-02-01	2007-02-01		6	7	0	0	1		0	0	2
113	113	4817	1947-05-30	1	3	97.1	0	2006-12-01	2007-02-06	2015-03-09	4.07	7	7	0	0	1	0.4	0	0	4
114	114	4817	1947-05-30	1	0	97.1	0	2006-12-01	2007-02-06	2015-03-09	4.07	7	7	0	0	1	0.4	0	0	4
115	115	4833	1942-07-22	1	2		0		2007-02-15	2007-02-15	13	6	6	0	0	0	0.1	0	0	4
116	116	4833	1942-07-22	1	1		0		2007-02-15	2007-02-15	13	6	6	0	0	0	0.1	0	0	4
117	117	4879	1940-09-10	0	x	11.87	0	2006-05-09	2007-03-23	2008-03-19	6.8	6		0	0	0	0.1	0	0	1
118	118	4879	1940-09-10	0	1	11.87	0	2006-05-09	2007-03-23	2008-03-19	6.8	6		0	0	0	0.1	0	0	1
119	119	4640	1939-09-13	1	3	19.57	0	2006-08-17	2007-03-23	2008-11-10	6.6	6	7	1	0	1	0.3	0	0	5
120	120	4640	1939-09-13	1	2	19.57	0	2006-08-17	2007-03-23	2008-11-10	6.6	6	7	1	0	1	0.3	0	0	5
121	121	4910	1936-08-25	1	3	36.53	0	2006-12-21	2007-04-18	2010-05-04	11	7	8	0	0	1	0.1	0	0	4
122	122	4910	1936-08-25	1	3	36.53	0	2006-12-21	2007-04-18	2010-05-04	11	7	8	0	0	1	0.1	0	0	4
123	123	4871	1947-05-22	1	1	33.27	1	2007-03-16	2007-04-24	2010-02-02	10.6	8	8	1	0	0	0.4	0	0	5
124	124	4871	1947-05-22	1	1	33.27	1	2007-03-16	2007-04-24	2010-02-02	10.6	8	8	1	0	0	0.4	0	0	5
125	125	4871	1947-05-22	1	1	33.27	1	2007-03-16	2007-04-24	2010-02-02	10.6	8	8	1	0	0	0.4	0	0	5
126	126	4871	1947-05-22	1	0	33.27	1	2007-03-16	2007-04-24	2010-02-02	10.6	8	8	1	0	0	0.4	0	0	5
127	127	4859	1949-10-14	0	0	90.9	0	2007-03-07	2007-05-22	2014-12-19	8.02	7	7	0	0	1	0.7	0	0	4
128	128	4859	1949-10-14	1	1	90.9	0	2007-03-07	2007-05-22	2014-12-19	8.02	7	7	0	0	1	0.7	0	0	4
129	129	4940	1939-06-25	0	0	84.2	0	2007-03-29	2007-05-23	2014-05-29	7.1	9	7	0	0	1	0.5	0	0	4
130	130	4940	1939-06-25	0	0	84.2	0	2007-03-29	2007-05-23	2014-05-29	7.1	9	7	0	0	1	0.5	0	0	4
131	131	4852	1942-05-25	0	2	78.63	0	2007-02-28	2007-05-29	2013-12-18	5.3	6	7	0	0	1	0.3	0	0	4
132	132	4852	1942-05-25	0	2	78.63	0	2007-02-28	2007-05-29	2013-12-18	5.3	6	7	0	0	1	0.3	0	0	4
133	133	4822	1951-09-10	1	1	84.37	0	2007-02-08	2007-05-29	2014-06-10	4.3	7	7	1	0	0	0.3	0	0	5
134	134	4822	1951-09-10	1	1	84.37	0	2007-02-08	2007-05-29	2014-06-10	4.3	7	7	1	0	0	0.3	0	0	5
135	135	4856	1951-01-03	1	1	7.77	0	2007-03-01	2007-06-05	2008-01-28	5.77	6	7	0	0	0	0.5	0	0	4
136	136	4856	1951-01-03	1	1	7.77	0	2007-03-01	2007-06-05	2008-01-28	5.77	6	7	0	0	0	0.5	0	0	4
137	137	4846	1948-03-07	1	1	77.23	0	2007-02-27	2007-06-14	2013-11-21		8	7	0	0	1	0.4	0	0	4
138	138	4846	1948-03-07	1	1	77.23	0	2007-02-27	2007-06-14	2013-11-21		8	7	0	0	1	0.4	0	0	4
139	139	4794	1937-09-09	0	0	92.5	0	2007-01-19	2007-09-11	2015-05-26	2.2	7	7	1	0	1	0.5	0	0	5
140	140	4794	1937-09-09	0	0	92.5	0	2007-01-19	2007-09-11	2015-05-26	2.2	7	7	1	0	1	0.5	0	0	5
141	141	4970	1950-02-02	1	3	71.13	1	2007-07-26	2007-09-18	2013-08-22	7.84	8	8	1	0	1	0.5	0	0	5
142	142	4970	1950-02-02	1	2	71.13	1	2007-07-26	2007-09-18	2013-08-22	7.84	8	8	1	0	1	0.5	0	0	5
143	143	4989	1942-08-30	1	x	66.73	0	2007-08-28	2007-09-20	2013-04-12	8.11	7	7	0	0	0	0.5	0	0	4
144	144	4989	1942-08-30	1	0	66.73	0	2007-08-28	2007-09-20	2013-04-12	8.11	7	7	0	0	0	0.5	0	0	4
145	145	5013	1942-09-09	1	1	64.6	1	2006-12-21	2007-10-16	2013-03-04	5.3	6	8	0	0	0	0.4	0	2	4
146	146	5013	1942-09-09	1	1	64.6	1	2006-12-21	2007-10-16	2013-03-04	5.3	6	8	0	0	0	0.4	0	2	4
147	147	4977	1960-05-13	1	2	6.13	0	2007-08-13	2007-10-19	2008-04-23	6.4	7	7	0	0	0	0.5	0	0	4
148	148	4977	1960-05-13	1	2	6.13	0	2007-08-13	2007-10-19	2008-04-23	6.4	7	7	0	0	0	0.5	0	0	4
149	149	5023	1938-09-26	1	2	23.87	0	2006-11-01	2007-11-06	2009-11-02	6	7	7	0	0	0	0.3	0	0	4
150	150	5023	1938-09-26	1	3	23.87	0	2006-11-01	2007-11-06	2009-11-02	6	7	7	0	0	0	0.3	0	0	4
151	151	5010	1955-12-15	1	1	87.23	0	2007-10-04	2007-11-27	2015-03-04	11.8	7	7	0	0	1	0.1	0	0	4
152	152	5010	1955-12-15	1	1	87.23	0	2007-10-04	2007-11-27	2015-03-04	11.8	7	7	0	0	1	0.1	0	0	4
153	153	5032	1947-04-09	0	2		0		2007-12-04	2007-12-04			9	0	0	1		0	0	4
154	154	5032	1947-04-09	1	0		0		2007-12-04	2007-12-04			9	0	0	1		0	0	4
155	155	5017	1956-12-27	1	2	57.77	1	2007-10-29	2008-01-08	2012-10-31	3.5	7	7	1		1	0.8	1	1	5
156	156	5017	1956-12-27	1	2	57.77	1	2007-10-29	2008-01-08	2012-10-31	3.5	7	7	1		1	0.8	1	1	5
157	157	5017	1956-12-27	0	2	57.77	1	2007-10-29	2008-01-08	2012-10-31	3.5	7	7	1		1	0.8	2	1	5
158	158	5017	1956-12-27	1	2	57.77	1	2007-10-29	2008-01-08	2012-10-31	3.5	7	7	1		1	0.8	1	1	5
159	159	5029	1956-03-09	1	3	82.67	0	2007-11-26	2008-01-21	2014-12-11	2.4	7	6	0	0	1	0.3	0	0	4
160	160	5029	1956-03-09	1	3	82.67	0	2007-11-26	2008-01-21	2014-12-11	2.4	7	6	0	0	1	0.3	0	0	4
161	161	4988	1947-11-19	0	1	51	1	2007-08-28	2007-10-09	2012-01-09	10.2	6	7	1	1	1	0.5	0	1	6
162	162	4988	1947-11-19	0	2	51	1	2007-08-28	2007-10-09	2012-01-09	10.2	6	7	1	1	1	0.5	0	1	6
163	163	5015	1947-02-18	1	0	0.43	0	2007-10-22	2008-02-12	2008-02-25	6.19	7	7	1	1	0	1	0	0	5
164	164	5015	1947-02-18	1	0	0.43	0	2007-10-22	2008-02-12	2008-02-25	6.19	7	7	1	1	0	1	0	0	5
165	165	4981	1935-09-19	0	3	29.33	0	2007-08-16	2008-04-10	2010-09-20	10.7	7	7	1	1	1	0.3	0	0	6
166	166	4981	1935-09-19	1	3	29.33	0	2007-08-16	2008-04-10	2010-09-20	10.7	7	7	1	1	1	0.3	0	0	6
167	167	5062	1946-12-17	1	3	5.7	1	2007-05-02	2008-04-18	2008-10-09	19.1	6	7	0	0	0	0.1	0	0	4
168	168	5062	1946-12-17	1	2	5.7	1	2007-05-02	2008-04-18	2008-10-09	19.1	6	7	0	0	0	0.1	0	0	4
169	169	5059	1945-09-17	1	2	83.67	0	2008-02-11	2008-05-08	2015-04-28	5.3	7	7	1	0	1	0.8	0	0	5
170	170	5059	1945-09-17	1	2	83.67	0	2008-02-11	2008-05-08	2015-04-28	5.3	7	7	1	0	1	0.8	0	0	5
171	171	5059	1945-09-17	1	2	83.67	0	2008-02-11	2008-05-08	2015-04-28	5.3	7	7	1	0	1	0.8	0	0	5
172	172	5059	1945-09-17	1	2	83.67	0	2008-02-11	2008-05-08	2015-04-28	5.3	7	7	1	0	1	0.8	0	0	5
173	173	5053	1940-01-09	1	1	20.67	1	2008-01-24	2008-06-03	2010-02-23	4.32	7	7	0	0	0	0.2	0	0	4
174	174	5053	1940-01-09	1	1	20.67	1	2008-01-24	2008-06-03	2010-02-23	4.32	7	7	0	0	0	0.2	0	0	4
175	175	5082	1939-09-09	1	2	22.83	0	2008-04-01	2008-06-17	2010-05-12	5.8	7	7	1	0	0	0.3	0	0	5
176	176	5082	1939-09-09	1	1	22.83	0	2008-04-01	2008-06-17	2010-05-12	5.8	7	7	1	0	0	0.3	0	0	5
178	1	3328	1941-04-30	1	2	141.9	0	2002-11-01	2003-01-27	2014-11-24	3.1	6	6	0	0	1	0.3	0	0	4
179	2	3328	1941-04-30	1	x	141.9	0	2002-11-01	2003-01-27	2014-11-24	3.1	6	6	0	0	1	0.3	0	0	4
180	3	3329	1949-08-21	1	1	53.37	0	2002-11-01	2003-02-04	2007-07-15	39	6	7	1	1	1	0.1	0	0	5
181	4	3329	1949-08-21	1	0	53.37	0	2002-11-01	2003-02-04	2007-07-15	39	6	7	1	1	1	0.1	0	0	5
182	5	3277	1932-01-24	1	0	60.3	1	2002-09-18	2003-02-13	2008-02-22	13	7	7	0	0	0	0.5	0	0	4
183	6	3277	1932-01-24	1	0	60.3	1	2002-09-18	2003-02-13	2008-02-22	13	7	7	0	0	0	0.5	0	0	4
184	7	3448	1957-11-29	1	0		0	2003-01-15	2003-02-18		7.5	7	7	0	0	1	0.5	0	0	4
185	8	3448	1957-11-29	1	1		0	2003-01-15	2003-02-18		7.5	7	7	0	0	1	0.5	0	0	4
186	9	3304	1934-02-25	1	1		0	2002-10-09	2003-03-03		9	6		0	0	1	0.3	0	0	4
187	10	3304	1934-02-25	1	0		0	2002-10-09	2003-03-03		9	6		0	0	1	0.3	0	0	4
188	11	3514	1950-01-16	1	2	18.03	0	2003-04-08	2003-05-20	2004-11-21	7.7	8	8	1	1	1	0.5	0	0	6
189	12	3514	1950-01-16	1	1	18.03	0	2003-04-08	2003-05-20	2004-11-21	7.7	8	8	1	1	1	0.5	0	0	6
190	13	3480	1933-10-23	1	0	62.27	0	2002-09-23	2003-05-20	2008-07-28	8.3	6	7	0	0	0	0.1	0	0	2
191	14	3480	1933-10-23	1	0	62.27	0	2002-09-23	2003-05-20	2008-07-28	8.3	6	7	0	0	0	0.1	0	0	2
192	15	3483	1955-05-21	1	1		0	2003-04-04	2003-08-13		3.4	7	7	0	0	1	0.3	0	0	4
193	16	3483	1955-05-21	1	1		0	2003-04-04	2003-08-13		3.4	7	7	0	0	1	0.3	0	0	4
194	17	3464	1939-09-06	1	1		0	2003-03-05	2003-07-15		16	6	7	0	0	0	0.6	0	0	4
195	18	3464	1939-09-06	1	1		0	2003-03-05	2003-07-15		16	6	7	0	0	0	0.6	0	0	4
196	19	3513	1949-06-12	1	2	86	0	2003-05-20	2003-09-04	2010-11-04	6.25	7	7	0	0	0	0.3	0	0	2
197	20	3513	1949-06-12	1	3	86	0	2003-05-20	2003-09-04	2010-11-04	6.25	7	7	0	0	0	0.3	0	0	2
198	21	3644	1939-01-14	1	1		0		2003-09-30		6.8	7	7	0	0	1		0	0	4
199	22	3644	1939-01-14	1	1		0		2003-09-30		6.8	7	7	0	0	1		0	0	4
200	23	4143	1937-02-01	1	2	109.7	0	2005-03-22	2005-05-05	2014-06-26	9.8	7	7	0	1	0	0.3	0	0	6
201	24	4143	1937-02-01	1	2	109.7	0	2005-03-22	2005-05-05	2014-06-26	9.8	7	7	0	1	0	0.3	0	0	6
202	25	3551	1936-12-19	1	0		0	2003-06-19	2003-10-02		6.1	7	7	0	0	1	0.6	0	0	4
203	26	3551	1936-12-19	1	0		0	2003-06-19	2003-10-02		6.1	7	7	0	0	1	0.6	0	0	4
204	27	3664	1936-09-18	1	0		0	2003-05-16	2003-10-16		3.2	6	7	1	0	0	0.8	0	0	5
205	28	3664	1936-09-18	1	1		0	2003-05-16	2003-10-16		3.2	6	7	1	0	0	0.8	0	0	5
206	29	3711	1941-11-11	1	2	24.5	1	2003-08-11	2003-12-04	2005-12-19	5.7	6	7	0	0	0	0.2	0	0	4
207	30	3711	1941-11-11	1	0	24.5	1	2003-08-11	2003-12-04	2005-12-19	5.7	6	7	0	0	0	0.2	0	0	4
208	31	4322	1942-05-26	1	2	42.13	1	2005-10-26	2006-01-03	2009-07-07	20	6	7	1	1	0	0.6	0	0	6
209	32	4322	1942-05-26	1	2	42.13	1	2005-10-26	2006-01-03	2009-07-07	20	6	7	1	1	0	0.6	0	0	6
210	33	3000	1943-03-19	1	1	85.5	0	2001-10-02	2002-04-18	2009-06-03	6.46	6		0	0	0	0.5	1	0	4
211	34	3000	1943-03-19	1	1	85.5	0	2001-10-02	2002-04-18	2009-06-03	6.46	6		0	0	0	0.5	1	0	4
212	35	2950	1931-09-08	1	x	125.47	1	2001-08-01	2002-04-25	2012-10-09	2.2	7	7	0	0	1	0.5	1	0	4
213	36	2950	1931-09-08	1	x	125.47	1	2001-08-01	2002-04-25	2012-10-09	2.2	7	7	0	0	1	0.5	1	0	4
214	37	2732	1941-01-22	1	2	74.8	0	2000-11-23	2001-02-22	2007-05-16	9.4	8	7	0	0	1	0.3	1	0	4
215	38	2732	1941-01-22	1	2	74.8	0	2000-11-23	2001-02-22	2007-05-16	9.4	8	7	0	0	1	0.3	1	0	4
216	39	3082	1946-06-13	1	3	90.47	1	2002-01-18	2002-05-30	2009-12-14	8.35	7		1	0	0	1	1	0	5
217	40	3082	1946-06-13	1	1	90.47	1	2002-01-18	2002-05-30	2009-12-14	8.35	7		1	0	0	1	1	0	5
218	41	3451	1941-06-20	1	x	66.83	0	2003-02-20	2003-07-15	2009-02-10	15.1	6	6	0	0	0	0.1	1	0	2
219	42	3451	1941-06-20	1	x	66.83	0	2003-02-20	2003-07-15	2009-02-10	15.1	6	6	0	0	0	0.1	1	0	2
220	43	3542	1940-04-10	1	1	29.33	1	2003-06-10	2003-09-04	2006-02-14	15.6	8	7	1	0	0	0.1	1	0	5
221	44	3542	1940-04-10	1	1	29.33	1	2003-06-10	2003-09-04	2006-02-14	15.6	8	7	1	0	0	0.1	1	0	5
222	45	3434	1935-07-12	1	1	48.07	1	2003-02-06	2003-07-29	2007-08-01	13.7	9	9	0	1	1	1	1	2	6
223	46	3434	1935-07-12	1	1	48.07	1	2003-02-06	2003-07-29	2007-08-01	13.7	9	9	0	1	1	1	1	2	6
224	47	3337	1931-04-28	1	0	28.2	1	2002-11-06	2003-02-11	2005-06-17	9	7	9	1	1	1	0.8	1	2	6
225	48	3337	1931-04-28	1	x	28.2	1	2002-11-06	2003-02-11	2005-06-17	9	7	9	1	1	1	0.8	1	2	6
226	49	3470	1940-02-08	1	1	59.97	0	2003-03-18	2003-04-29	2008-04-28	4.61	8	7	0	0	1	0.5	1	0	2
227	50	3470	1940-02-08	1	2	59.97	0	2003-03-18	2003-04-29	2008-04-28	4.61	8	7	0	0	1	0.5	1	0	2
228	51	3211	1936-11-20	1	x		0	2002-06-26	2002-10-29		5.1	7	6	1	0	0	0.3	1	0	5
229	52	3211	1936-11-20	1	1		0	2002-06-26	2002-10-29		5.1	7	6	1	0	0	0.3	1	0	5
230	53	3375	1934-05-18	1	1	60.2	0	2002-12-09	2003-05-06	2008-05-12	6.1	7		0	0	0	0.5	1	0	4
231	54	3375	1934-05-18	1	1	60.2	0	2002-12-09	2003-05-06	2008-05-12	6.1	7		0	0	0	0.5	1	0	4
232	55	3188	1943-05-14	1	1		0	2002-05-24	2002-10-01		8.1	6	7	0	0	1	0.5	0	0	4
233	56	3188	1943-05-14	1	1		0	2002-05-24	2002-10-01		8.1	6	7	0	0	1	0.5	0	0	4
234	57	3759	1940-04-10	1	2	78.9	0	2004-01-01	2004-10-21	2011-05-18	24	7	7	0	0	0	0.6	1	0	4
235	58	3759	1940-04-10	1	1	78.9	0	2004-01-01	2004-10-21	2011-05-18	24	7	7	0	0	0	0.6	1	0	4
236	59	3887	1955-11-18	1	0	76.6	0	2004-06-17	2005-03-31	2011-08-18	17.5	7	7	0	0	0	1	1	0	4
237	60	3887	1955-11-18	1	1	76.6	0	2004-06-17	2005-03-31	2011-08-18	17.5	7	7	0	0	0	1	1	0	4
238	61	4312	1941-02-10	1	2	35.13	0	2005-10-18	2006-06-08	2009-05-12	5.8	9		0	0	0	0.4	1	0	2
239	62	4312	1941-02-10	1	1	35.13	0	2005-10-18	2006-06-08	2009-05-12	5.8	9		0	0	0	0.4	1	0	2
240	63	2732	1941-01-22	1	2	74.8	0	2000-11-23	2001-02-22	2007-05-16	9.4	8	7	0	0	1	0.3	1	0	4
241	64	2732	1941-01-22	1	2	74.8	0	2000-11-23	2001-02-22	2007-05-16	9.4	8	7	0	0	1	0.3	1	0	4
242	65	3010	1928-07-21	1	1		1	2001-10-11	2002-03-19		12.2	9		0	0	0	0.4	2	0	2
243	66	3010	1928-07-21	1	1		1	2001-10-11	2002-03-19		12.2	9		0	0	0	0.4	2	0	2
244	67	3290	1938-09-21	1	x	80.33	0	2002-09-22	2003-02-04	2009-10-14	9.27	7		0	0	1	0.3	1	0	4
245	68	3290	1938-09-21	1	0	80.33	0	2002-09-22	2003-02-04	2009-10-14	9.27	7		0	0	1	0.3	1	0	4
246	69	3116	1936-05-05	1	1	123.27	0	2001-08-01	2002-02-21	2012-05-29	6.3	7		0	0	0	0.8	1	0	4
247	70	3116	1936-05-05	1	1	123.27	0	2001-08-01	2002-02-21	2012-05-29	6.3	7		0	0	0	0.8	1	0	4
248	71	4062	1951-04-19	1	x	23.9	0	2005-01-07	2006-05-02	2008-04-29	5.7	7	7	0	0	0	0.5	1	0	4
249	72	4062	1951-04-19	1	x	23.9	0	2005-01-07	2006-05-02	2008-04-29	5.7	7	7	0	0	0	0.5	1	0	4
250	73	4070	1934-04-27	1	0	53.1	1	2005-01-13	2005-08-04	2010-01-07	13	9	7	0	0	0	0.9	1	0	4
251	74	4070	1934-04-27	1	1	53.1	1	2005-01-13	2005-08-04	2010-01-07	13	9	7	0	0	0	0.9	1	0	4
252	75	3561	1942-04-23	1	1	38	1	2003-06-19	2004-05-06	2007-07-06	8.4	9		1	1	1	0.5	1	0	6
253	76	3561	1942-04-23	1	1	38	1	2003-06-19	2004-05-06	2007-07-06	8.4	9		1	1	1	0.5	1	0	6
254	77	2972	1929-11-10	1	2	99.13	0	2001-09-04	2002-08-06	2010-11-10	16.1	6	6	0	0	0	0.2	1	0	4
255	78	2972	1929-11-10	1	2	99.13	0	2001-09-04	2002-08-06	2010-11-10	16.1	6	6	0	0	0	0.2	1	0	4
256	79	2934	1935-12-14	1	x	144.17	0	2001-07-12	2002-04-23	2014-04-28	5.5	7		0	0	0	0.7	1	0	4
257	80	2934	1935-12-14	1	1	144.17	0	2001-07-12	2002-04-23	2014-04-28	5.5	7		0	0	0	0.7	1	0	4
258	81	3498	1943-08-30	1	1	7.97	1		2003-05-01	2003-12-30	18	6	7	1	0	1		1	0	5
259	82	3498	1943-08-30	1	2	7.97	1		2003-05-01	2003-12-30	18	6	7	1	0	1		1	0	5
260	83	3355	1940-07-05	1	x	60.67	0	2002-11-21	2003-06-10	2008-06-30	8.8	5	6	0	0	0	0.1	1	0	4
261	84	3355	1940-07-05	1	x	60.67	0	2002-11-21	2003-06-10	2008-06-30	8.8	5	6	0	0	0	0.1	1	0	4
262	85	3570	1941-05-14	1	2	58.9	1	2003-07-15	2004-04-29	2009-03-26	12.3	7	7	1	1	1	1	1	0	6
263	86	3570	1941-05-14	1	1	58.9	1	2003-07-15	2004-04-29	2009-03-26	12.3	7	7	1	1	1	1	1	0	6
264	87	3954	1955-07-15	1	1	24.83	1	2004-09-14	2005-05-19	2007-06-14	40	9		1	0	0	0.5	1	0	5
265	88	3954	1955-07-15	1	2	24.83	1	2004-09-14	2005-05-19	2007-06-14	40	9		1	0	0	0.5	1	0	5
266	89	2334	1936-09-17	1	2	110.17	1	1999-04-27	2002-02-14	2011-04-19	11.7	6		0	0	1	0.5	1	0	4
267	90	2334	1936-09-17	1	1	110.17	1	1999-04-27	2002-02-14	2011-04-19	11.7	6		0	0	1	0.5	1	0	4
268	91	2912	1934-02-04	1	2		0	2001-06-14	2002-03-07		13	6		1	0	0	0.3	1	0	5
269	92	2912	1934-02-04	1	2		0	2001-06-14	2002-03-07		13	6		1	0	0	0.3	1	0	5
270	93	2854	1945-07-03	1	1	15.27	1	2001-03-30	2002-04-18	2003-07-26	25	6	6	1	0	1	0.3	1	0	5
271	94	2854	1945-07-03	1	1	15.27	1	2001-03-30	2002-04-18	2003-07-26	25	6	6	1	0	1	0.3	1	0	5
272	95	2976	1953-01-07	1	2	46.23	1	2001-09-07	2002-05-16	2006-03-23	10.8	7	7	0	0	0	0.5	1	0	4
273	96	2976	1953-01-07	1	2	46.23	1	2001-09-07	2002-05-16	2006-03-23	10.8	7	7	0	0	0	0.5	1	0	4
274	97	2967	1948-05-04	1	1	25.03	1	2001-08-30	2002-06-04	2004-07-05	14.7	7		1	1	0	0.8	1	2	5
275	98	2967	1948-05-04	1	1	25.03	1	2001-08-30	2002-06-04	2004-07-05	14.7	7		1	1	0	0.8	1	2	5
276	99	2956	1949-03-30	1	2	41.3	1	2001-08-16	2002-06-06	2005-11-15	6.2	7	7	1	1	0	0.4	1	0	6
277	100	2956	1949-03-30	1	2	41.3	1	2001-08-16	2002-06-06	2005-11-15	6.2	7	7	1	1	0	0.4	1	0	6
278	101	3496	1936-01-17	1	1	135	1	2003-04-30	2003-12-02	2015-03-02	39.2	7		0	0	0	0.5	1	0	4
279	102	3496	1936-01-17	1	1	135	1	2003-04-30	2003-12-02	2015-03-02	39.2	7		0	0	0	0.5	1	0	4
280	103	4085	1936-03-14	1	2	25.67	0	2005-01-26	2005-12-01	2008-01-21	15.6	7	7	0	0	0	0.3	1	0	4
281	104	4085	1936-03-14	1	2	25.67	0	2005-01-26	2005-12-01	2008-01-21	15.6	7	7	0	0	0	0.3	1	0	4
282	105	3731	1943-06-03	1	x	83.27	0	2003-12-30	2004-11-16	2011-10-24		7	7	0	0	0	0.9	1	0	4
283	106	3731	1943-06-03	1	x	83.27	0	2003-12-30	2004-11-16	2011-10-24		7	7	0	0	0	0.9	1	0	4
284	107	3885	1937-01-16	1	3	122.67	0	2004-06-17	2005-03-01	2015-05-21	4.3	9	9	1	1	1	1	1	0	6
285	108	3885	1937-01-16	1	3	122.67	0	2004-06-17	2005-03-01	2015-05-21	4.3	9	9	1	1	1	1	1	0	6
286	109	2910	1944-06-18	1	1	43.4	1	2001-06-14	2002-02-28	2005-10-12	10.4	8		1	1	0	0.6	1	0	6
287	110	2910	1944-06-18	1	x	43.4	1	2001-06-14	2002-02-28	2005-10-12	10.4	8		1	1	0	0.6	1	0	6
288	111	3744	1953-04-11	1	1	13	1	2004-01-19	2004-10-14	2005-11-14	32.5	9		1	1	1	1	1	2	7
289	112	3744	1953-04-11	1	0	13	1	2004-01-19	2004-10-14	2005-11-14	32.5	9		1	1	1	1	1	2	7
290	113	3609	1946-02-22	1	0		0		2003-08-26		8		7	0	0	0		0	0	4
291	114	3609	1946-02-22	1	0		0		2003-08-26		8		7	0	0	0		0	0	4
292	115	4060	1934-01-07	1	1	25.2	1	2005-01-06	2005-09-15	2007-10-21	14	9		1	1	0	0.9	1	0	6
293	116	4060	1934-01-07	1	x	25.2	1	2005-01-06	2005-09-15	2007-10-21	14	9		1	1	0	0.9	1	0	6
294	117	3210	1950-02-23	1	2	12.8	0		2002-06-20	2003-07-14	2.3	6	6	0	0	0		1	0	4
295	118	3210	1950-02-23	1	2	12.8	0		2002-06-20	2003-07-14	2.3	6	6	0	0	0		1	0	4
296	119	2890	1941-04-11	1	1	21.67	1	2001-05-11	2002-02-05	2003-11-25	30	6	6	0	1	0	1	1	0	6
297	120	2890	1941-04-11	1	2	21.67	1	2001-05-11	2002-02-05	2003-11-25	30	6	6	0	1	0	1	1	0	6
298	121	3662	1936-05-05	1	1	10.53	1	2003-10-16	2004-09-24	2005-08-10	35	7	7	0	1	0	0.7	1	0	6
299	122	3662	1936-05-05	1	1	10.53	1	2003-10-16	2004-09-24	2005-08-10	35	7	7	0	1	0	0.7	1	0	6
300	123	4051	1939-12-29	1	0		0	2004-12-21	2005-05-05		4.6	7	8	1	1	1	0.8	0	0	6
301	124	4051	1939-12-29	1	0		0	2004-12-21	2005-05-05		4.6	7	8	1	1	1	0.8	0	0	6
302	125	3190	1934-06-12	1	x	112.67	0	2002-05-29	2003-03-11	2012-08-01	8.2	7		0	0	0	0.6	1	0	4
303	126	3190	1934-06-12	1	1	112.67	0	2002-05-29	2003-03-11	2012-08-01	8.2	7		0	0	0	0.6	1	0	4
304	127	3166	1936-10-28	1	x	28.93	1	2002-04-25	2003-04-03	2005-08-31	8.9	7		1	0	0	0.8	1	0	5
305	128	3166	1936-10-28	1	x	28.93	1	2002-04-25	2003-04-03	2005-08-31	8.9	7		1	0	0	0.8	1	0	5
306	129	3660	1934-01-10	1	1		0	2002-11-15	2003-10-14		8.8	9		0	0	0	0.1	0	0	2
307	130	3660	1934-01-10	1	1		0	2002-11-15	2003-10-14		8.8	9		0	0	0	0.1	0	0	2
308	131	3333	1941-08-03	1	1	56.97	1	2002-11-05	2003-09-18	2008-06-17	9.8	9	9	1	1	1	0.4	1	0	6
309	132	3333	1941-08-03	1	1	56.97	1	2002-11-05	2003-09-18	2008-06-17	9.8	9	9	1	1	1	0.4	1	0	6
310	133	3159	1949-05-07	1	1	7.83	1	2002-04-18	2003-06-12	2004-02-07		7		0			0.7	0	0	4
311	134	3159	1949-05-07	1	1	7.83	1	2002-04-18	2003-06-12	2004-02-07		7		0			0.7	0	0	4
312	135	3039	1942-09-13	1	2	19.47	1	2001-11-19	2002-12-12	2004-07-26	42.9	8		1	1	1	1	1	0	6
313	136	3039	1942-09-13	1	0	19.47	1	2001-11-19	2002-12-12	2004-07-26	42.9	8		1	1	1	1	1	0	6
314	137	3057	1941-10-15	1	1	112.13	1	2001-12-15	2002-11-28	2012-04-02	8.53	9		0	1	0		1	2	6
315	138	3057	1941-10-15	1	1	112.13	1	2001-12-15	2002-11-28	2012-04-02	8.53	9		0	1	0		1	2	6
316	139	3819	1939-06-26	1	1	87.87	0	2004-03-01	2004-12-22	2012-04-18	13	7		0	0	0	0.5	1	0	4
317	140	3819	1939-06-26	1	0	87.87	0	2004-03-01	2004-12-22	2012-04-18	13	7		0	0	0	0.5	1	0	4
318	141	3031	1946-02-05	1	0	16.13	1	2001-11-07	2002-06-13	2003-10-17	7	6		1	1	1	0.5	1	0	5
319	142	3031	1946-02-05	1	1	16.13	1	2001-11-07	2002-06-13	2003-10-17	7	6		1	1	1	0.5	1	0	5
320	143	2643	1942-12-04	1	x	13.73	1	2000-06-28	2001-03-22	2002-05-14	16.2	7		1	1	0	0.5	1	0	6
321	144	2643	1942-12-04	1	x	13.73	1	2000-06-28	2001-03-22	2002-05-14	16.2	7		1	1	0	0.5	1	0	6
322	145	2566	1947-08-12	1	x	8.23	1	2000-03-31	2001-01-11	2001-09-18	22.9	9		1	0	0	0.1	1	2	5
323	146	2566	1947-08-12	1	1	8.23	1	2000-03-31	2001-01-11	2001-09-18	22.9	9		1	0	0	0.1	1	2	5
324	147	2740	1940-02-28	1	2	13.3	1	2000-11-30	2001-11-22	2003-01-01	35.1	7		1	1	0	0.6	1	1	6
325	148	2740	1940-02-28	1	2	13.3	1	2000-11-30	2001-11-22	2003-01-01	35.1	7		1	1	0	0.6	1	1	6
326	149	3246	1936-11-10	1	1	48.63	1	2002-08-19	2002-11-12	2006-12-01	17	8	9	1	1	1	0.4	0	2	5
327	150	3246	1936-11-10	1	2	48.63	1	2002-08-19	2002-11-12	2006-12-01	17	8	9	1	1	1	0.4	0	2	5
328	151	4556	1938-03-03	1	1	256.13	1		1990-01-01	2011-05-05			8	1	1	1		1	1	7
329	152	4556	1938-03-03	1	2	256.13	1		1990-01-01	2011-05-05			8	1	1	1		1	1	7
330	153	3392	1912-05-08	1	2		1							0				0	0
331	154	3392	1912-05-08	1	1		1							0				0	0
332	155	3341	1946-09-09	1	1	102.43	1	2002-11-08	2003-02-25	2011-09-08	6.59	7	7	1	1	0	0.3	0	1	6
333	156	3341	1946-09-09	1	2	102.43	1	2002-11-08	2003-02-25	2011-09-08	6.59	7	7	1	1	0	0.3	0	1	6
334	157	1175	1927-03-31	1	x		0	1994-03-23			7.4	5		0			1	1	0	5
335	158	1175	1927-03-31	1	1		0	1994-03-23			7.4	5		0			1	1	0	5
336	159	3522	1948-07-01	1	1	13.5	1	2003-05-23	2004-01-22	2005-03-07	3.4	9	9	1	1	1	0.5	1	2	6
337	160	3522	1948-07-01	1	1	13.5	1	2003-05-23	2004-01-22	2005-03-07	3.4	9	9	1	1	1	0.5	1	2	6
338	161	4248	1949-12-05	1	x	49.17	0	2005-07-27	2006-02-03	2010-03-08	7.8	7		0	0	0	0.5	1	0	4
339	162	4248	1949-12-05	1	1	49.17	0	2005-07-27	2006-02-03	2010-03-08	7.8	7		0	0	0	0.5	1	0	4
340	163	4122	1932-05-19	1	2		0							0				0	0
341	164	4122	1932-05-19	1	3		0							0				0	0
342	165	4077	1946-09-08	1	2		0							0				0	0
343	166	4077	1946-09-08	1	3		0							0				0	0
344	167	2776	1923-07-11	1	1		0							0				0	0
345	168	2776	1923-07-11	1	x		0							0				0	0
346	169	2774	1928-10-10	1	2		1			2001-07-10		8		0				0	0	5
347	170	2774	1928-10-10	1	2		1			2001-07-10		8		0				0	0	5
348	171	2487	1924-07-15	1	1		1	1994-07-11		2001-07-09	20.2	5		0			0	1	0	2
349	172	2487	1924-07-15	1	3		1	1994-07-11		2001-07-09	20.2	5		0			0	1	0	2
350	173	3844	1947-02-02	1	1	11.33	1	2004-05-06	2006-01-05	2006-12-15	7.4	7	8	0	1	1	0.8	1	1	6
351	174	3844	1947-02-02	1	2	11.33	1	2004-05-06	2006-01-05	2006-12-15	7.4	7	8	0	1	1	0.8	1	1	6
352	175	3340	1940-04-25	1	0	27.77	1	2002-11-08	2003-08-26	2005-12-19	6.71	7	8	1	0	0	0.8	1	0	5
353	176	3340	1940-04-25	1	x	27.77	1	2002-11-08	2003-08-26	2005-12-19	6.71	7	8	1	0	0	0.8	1	0	5
355	1	5666	1965-05-12	0	1	25.6	0	2009-07-17	2009-11-04	2011-12-22	5.4	6	7	1	0	0	0.1	0	0	5
356	2	5666	1965-05-12	1	2	25.6	0	2009-07-17	2009-11-04	2011-12-22	5.4	6	7	1	0	0	0.1	0	0	5
357	3	5666	1965-05-12	1	2	25.6	0	2009-07-17	2009-11-04	2011-12-22	5.4	6	7	1	0	0	0.1	0	0	5
358	4	5657	1952-05-21	0	0	48.47	0	2009-06-18	2009-10-15	2013-10-29	6.1	7	7	1	0	0	0.2	0	0	5
359	5	5657	1952-05-21	1	0	48.47	0	2009-06-18	2009-10-15	2013-10-29	6.1	7	7	1	0	0	0.2	0	0	5
360	6	5657	1952-05-21	1	2	48.47	0	2009-06-18	2009-10-15	2013-10-29	6.1	7	7	1	0	0	0.2	0	0	5
361	7	6922	1953-11-08	0	0	21.43	0	2011-09-09	2011-10-18	2013-07-31	27	9	8	0	0	0	0.3	0	0	2
362	8	6922	1953-11-08	1	1	21.43	0	2011-09-09	2011-10-18	2013-07-31	27	9	8	0	0	0	0.3	0	0	2
363	9	6922	1953-11-08	1	0	21.43	0	2011-09-09	2011-10-18	2013-07-31	27	9	8	0	0	0	0.3	0	0	2
364	10	5567	1956-03-09	0	0	33.8	0	2009-01-21	2009-04-08	2012-02-02	8.9	7	7	0	0	0	0.5	0	0	4
365	11	5567	1956-03-09	1	1	33.8	0	2009-01-21	2009-04-08	2012-02-02	8.9	7	7	0	0	0	0.5	0	0	4
366	12	5567	1956-03-09	0	1	33.8	0	2009-01-21	2009-04-08	2012-02-02	8.9	7	7	0	0	0	0.5	0	0	4
367	13	5564	1942-03-15	1	0	65.6	0	2008-10-23	2009-03-10	2014-08-28	5.9	6	6	0	0	0	0.3	0	0	4
368	14	5564	1942-03-15	1	2	65.6	0	2008-10-23	2009-03-10	2014-08-28	5.9	6	6	0	0	0	0.3	0	0	4
369	15	5564	1942-03-15	1	2	65.6	0	2008-10-23	2009-03-10	2014-08-28	5.9	6	6	0	0	0	0.3	0	0	4
370	16	5669	1951-08-25	1	2	59.93	0	2009-04-30	2009-11-05	2014-11-03	5.7	7	7	0	0	0	0.3	0	0	4
371	17	5669	1951-08-25	1	1	59.93	0	2009-04-30	2009-11-05	2014-11-03	5.7	7	7	0	0	0	0.3	0	0	4
372	18	5669	1951-08-25	1	2	59.93	0	2009-04-30	2009-11-05	2014-11-03	5.7	7	7	0	0	0	0.3	0	0	4
373	19	6823	1932-12-12	1	2	13.13	1	2011-03-29	2011-09-06	2012-10-10	8	9		1	1	1	0.2	1	0	6
374	20	6823	1932-12-12	1	0	13.13	1	2011-03-29	2011-09-06	2012-10-10	8	9		1	1	1	0.2	1	0	6
375	21	6823	1932-12-12	0	1	13.13	1	2011-03-29	2011-09-06	2012-10-10	8	9		1	1	1	0.2	2	0	6
376	22	6850	1966-03-06	1	1	32.23	0	2011-06-17	2011-10-03	2014-06-10	4.13	6	7	0	0	0	0.1	0	0	4
377	23	6850	1966-03-06	1	2	32.23	0	2011-06-17	2011-10-03	2014-06-10	4.13	6	7	0	0	0	0.1	0	0	4
378	24	6850	1966-03-06	1	2	32.23	0	2011-06-17	2011-10-03	2014-06-10	4.13	6	7	0	0	0	0.1	0	0	4
379	25	6808	1962-08-29	1	1	40.77	0	2011-07-04	2011-08-22	2015-01-15	26	8	7	1	0	1	0.2	0	0	5
380	26	6808	1962-08-29	1	3	40.77	0	2011-07-04	2011-08-22	2015-01-15	26	8	7	1	0	1	0.2	0	0	5
381	27	6808	1962-08-29	1	1	40.77	0	2011-07-04	2011-08-22	2015-01-15	26	8	7	1	0	1	0.2	0	0	5
382	28	5638	1944-05-04	0	0	24.7	0	2009-05-20	2011-10-13	2013-11-04	4.3	6		0	0	0	0.1	0	0	2
383	29	5638	1944-05-04	1	0	24.7	0	2009-05-20	2011-10-13	2013-11-04	4.3	6		0	0	0	0.1	0	0	2
384	30	5638	1944-05-04	1	0	24.7	0	2009-05-20	2011-10-13	2013-11-04	4.3	6		0	0	0	0.1	0	0	2
385	31	5674	1949-04-23	0	2	25.77	0	2009-06-24	2009-11-10	2012-01-03	5.2	6	6	0	0	0	0.6	0	0	4
386	32	5674	1949-04-23	0	1	25.77	0	2009-06-24	2009-11-10	2012-01-03	5.2	6	6	0	0	0	0.6	0	0	4
387	33	5674	1949-04-23	1	2	25.77	0	2009-06-24	2009-11-10	2012-01-03	5.2	6	6	0	0	0	0.6	0	0	4
388	34	5660	1948-11-23	1	0	9.5	0	2009-07-22	2009-10-27	2010-08-12	5.8	7	9	0	0	1	0.1	0	0	4
389	35	5660	1948-11-23	1	0	9.5	0	2009-07-22	2009-10-27	2010-08-12	5.8	7	9	0	0	1	0.1	0	0	4
390	36	5660	1948-11-23	1	0	9.5	0	2009-07-22	2009-10-27	2010-08-12	5.8	7	9	0	0	1	0.1	0	0	4
391	37	5636	1957-02-27	0	1	0.43	0	2009-04-17	2009-09-17	2009-09-30	5.5	7	7	1	0	1	0.4	0	0	5
392	38	5636	1957-02-27	1	2	0.43	0	2009-04-17	2009-09-17	2009-09-30	5.5	7	7	1	0	1	0.4	0	0	5
393	39	5636	1957-02-27	1	1	0.43	0	2009-04-17	2009-09-17	2009-09-30	5.5	7	7	1	0	1	0.4	0	0	5
394	40	6771	1956-04-30	0	0	24	0	2011-05-05	2011-08-02	2013-08-02	2.2	6	7	0	0	0	0.1	0	0	4
395	41	6771	1956-04-30	0	1	24	0	2011-05-05	2011-08-02	2013-08-02	2.2	6	7	0	0	0	0.1	0	0	4
396	42	6771	1956-04-30	0	1	24	0	2011-05-05	2011-08-02	2013-08-02	2.2	6	7	0	0	0	0.1	0	0	4
397	43	6836	1941-09-25	0	2	11.9	0	2011-06-23	2011-10-19	2012-10-16	5.5	8	7	0	0	0	0.1	0	0	4
398	44	6836	1941-09-25	0	1	11.9	0	2011-06-23	2011-10-19	2012-10-16	5.5	8	7	0	0	0	0.1	0	0	4
399	45	6836	1941-09-25	0	1	11.9	0	2011-06-23	2011-10-19	2012-10-16	5.5	8	7	0	0	0	0.1	0	0	4
400	46	6810	1948-08-17	0	0	38.33	0	2011-07-13	2011-08-24	2014-11-04	6.9	8	7	0	1	0	0.1	0	0	6
401	47	6810	1948-08-17	1	1	38.33	0	2011-07-13	2011-08-24	2014-11-04	6.9	8	7	0	1	0	0.1	0	0	6
402	48	6810	1948-08-17	1	2	38.33	0	2011-07-13	2011-08-24	2014-11-04	6.9	8	7	0	1	0	0.1	0	0	6
403	49	7025	1953-01-09	0	1	38.03	0	2011-09-22	2011-12-15	2015-02-16	5.7	8	7	1	0	1	0.4	0	0	5
404	50	7025	1953-01-09	1	3	38.03	0	2011-09-22	2011-12-15	2015-02-16	5.7	8	7	1	0	1	0.4	0	0	5
405	51	7025	1953-01-09	1	3	38.03	0	2011-09-22	2011-12-15	2015-02-16	5.7	8	7	1	0	1	0.4	0	0	5
406	52	6891	1949-03-20	0	2	1.03	0	2011-07-11	2011-09-02	2011-10-03	5.4	8	7	1	1	0	0.6	0	0	5
407	53	6891	1949-03-20	1	2	1.03	0	2011-07-11	2011-09-02	2011-10-03	5.4	8	7	1	1	0	0.6	0	0	5
408	54	6891	1949-03-20	1	1	1.03	0	2011-07-11	2011-09-02	2011-10-03	5.4	8	7	1	1	0	0.6	0	0	5
409	55	5562	1949-01-01	0	0	69.33	0	2007-10-30	2009-02-10	2014-11-20	0.53	7	7	0	0	1	0.5	0	0	4
410	56	5562	1949-01-01	1	2	69.33	0	2007-10-30	2009-02-10	2014-11-20	0.53	7	7	0	0	1	0.5	0	0	4
411	57	5562	1949-01-01	1	1	69.33	0	2007-10-30	2009-02-10	2014-11-20	0.53	7	7	0	0	1	0.5	0	0	4
412	58	6983	1943-03-19	0	0	4.57	0	2011-07-20	2011-10-28	2012-03-15	7.75	7	7	1	1	0	0.3	0	0	5
413	59	6983	1943-03-19	1	2	4.57	0	2011-07-20	2011-10-28	2012-03-15	7.75	7	7	1	1	0	0.3	0	0	5
414	60	6983	1943-03-19	1	2	4.57	0	2011-07-20	2011-10-28	2012-03-15	7.75	7	7	1	1	0	0.3	0	0	5
415	61	6851	1955-05-25	1	3	41.9	1	2011-07-14	2011-10-24	2015-04-21	7.9	9	9	1	0	0	1	0	0	5
416	62	6851	1955-05-25	1	2	41.9	1	2011-07-14	2011-10-24	2015-04-21	7.9	9	9	1	0	0	1	0	0	5
417	63	6851	1955-05-25	1	2	41.9	1	2011-07-14	2011-10-24	2015-04-21	7.9	9	9	1	0	0	1	0	0	5
418	64	6655	1939-07-23	0	1	22.27	0	2011-03-16	2011-08-30	2013-07-08	19	7	7	1	0	0	0.6	0	0	5
419	65	6655	1939-07-23	1	2	22.27	0	2011-03-16	2011-08-30	2013-07-08	19	7	7	1	0	0	0.6	0	0	5
420	66	6655	1939-07-23	1	2	22.27	0	2011-03-16	2011-08-30	2013-07-08	19	7	7	1	0	0	0.6	0	0	5
421	67	7061	1944-03-14	0	1	37.6	1	2011-10-20	2011-12-14	2015-02-02	7.1	9	9	1	1	1	0.4	0	0	5
422	68	7061	1944-03-14	1	x	37.6	1	2011-10-20	2011-12-14	2015-02-02	7.1	9	9	1	1	1	0.4	0	0	5
423	69	7061	1944-03-14	1	x	37.6	1	2011-10-20	2011-12-14	2015-02-02	7.1	9	9	1	1	1	0.4	0	0	5
424	70	6863	1946-05-27	0	0	3.9	0	2011-05-10	2011-09-29	2012-01-26	8.8	8	6	0	0	0	0.1	0	0	4
425	71	6863	1946-05-27	0	0	3.9	0	2011-05-10	2011-09-29	2012-01-26	8.8	8	6	0	0	0	0.1	0	0	4
426	72	6863	1946-05-27	0	1	3.9	0	2011-05-10	2011-09-29	2012-01-26	8.8	8	6	0	0	0	0.1	0	0	4
427	73	6920	1948-12-18	1	1	23.27	1	2011-04-14	2011-10-18	2013-09-26	162	8		1	1	1	0.3	1	0	6
428	74	6920	1948-12-18	1	1	23.27	1	2011-04-14	2011-10-18	2013-09-26	162	8		1	1	1	0.3	1	0	6
429	75	6942	1940-09-15	1	1	2.67	1	2011-01-10	2011-10-27	2012-01-17	10.79	8		1	1	1	0.1	1	1	6
430	76	6942	1940-09-15	1	1	2.67	1	2011-01-10	2011-10-27	2012-01-17	10.79	8		1	1	1	0.1	1	1	6
431	77	6822	1939-10-19	1	2	34.7	0	2011-05-06	2011-09-08	2014-07-29	8.2	7	7	0	0	0	0.4	1	0	4
432	78	6822	1939-10-19	1	3	34.7	0	2011-05-06	2011-09-08	2014-07-29	8.2	7	7	0	0	0	0.4	1	0	4
433	79	6655	1939-07-23	1	1	22.27	0	2011-03-16	2011-08-30	2013-07-08	19	7	7	1	0	0	0.6	0	0	5
434	80	6655	1939-07-23	1	2	22.27	0	2011-03-16	2011-08-30	2013-07-08	19	7	7	1	0	0	0.6	0	0	5
435	81	3783	1934-02-12	1	1	6.47	1	2004-02-26	2004-05-17	2004-12-01	0.6	8	9	1	1	0		0	1	6
436	82	3783	1934-02-12	1	1	6.47	1	2004-02-26	2004-05-17	2004-12-01	0.6	8	9	1	1	0		0	1	6
437	83	4229	1948-07-23	1	1	69.23	1	2005-07-06	2005-08-25	2011-06-02	5.03	7	8	1	0	1	0.1	0	0	5
438	84	4229	1948-07-23	1	0	69.23	1	2005-07-06	2005-08-25	2011-06-02	5.03	7	8	1	0	1	0.1	0	0	5
439	85	4537	1948-11-02	1	3	54.87	1	2006-04-21	2006-06-05	2010-12-31	4.16	7	8	1	1	1	0.5	0	1	6
440	86	4537	1948-11-02	1	3	54.87	1	2006-04-21	2006-06-05	2010-12-31	4.16	7	8	1	1	1	0.5	0	1	6
441	87	4656	1946-04-26	1	1	5.13	1	2006-09-11	2007-03-09	2007-08-13	6.53	9	9	1	1	1		1	1	6
442	88	4656	1946-04-26	1	1	5.13	1	2006-09-11	2007-03-09	2007-08-13	6.53	9	9	1	1	1		1	1	6
443	89	4776	1950-09-16	1	2	23.5	1	2007-01-05	2007-06-05	2009-05-20	19.34	7	9	1	1	1	0.9	1	2	6
444	90	4776	1950-09-16	1	1	23.5	1	2007-01-05	2007-06-05	2009-05-20	19.34	7	9	1	1	1	0.9	1	2	6
445	91	5017	1956-12-27	1	2	57.77	1	2007-10-29	2008-01-08	2012-10-31	3.5	7	7	1		1	0.8	1	1	5
446	92	5017	1956-12-27	1	3	57.77	1	2007-10-29	2008-01-08	2012-10-31	3.5	7	7	1		1	0.8	1	1	5
447	93	4979	1941-09-20	1	x	41.2	1	2007-08-14	2008-03-04	2011-08-10	33.4	10		1	0	0	1	1	0	5
448	94	4979	1941-09-20	1	x	41.2	1	2007-08-14	2008-03-04	2011-08-10	33.4	10		1	0	0	1	1	0	5
449	95	5081	1932-10-17	1	x	73.2	1	2008-04-01	2008-05-21	2014-06-27	19	9	9	1	0	1	0.5	0	1	5
450	96	5081	1932-10-17	1	2	73.2	1	2008-04-01	2008-05-21	2014-06-27	19	9	9	1	0	1	0.5	0	1	5
451	97	5098	1954-04-19	1	0	77.43	1	2008-04-25	2008-07-29	2015-01-12	18	7	9	1	1	0	0.5	1	1	6
452	98	5098	1954-04-19	1	1	77.43	1	2008-04-25	2008-07-29	2015-01-12	18	7	9	1	1	0	0.5	1	1	6
453	99	5046	1951-08-10	1	x	31.37	1	2007-12-01	2008-09-05	2011-04-16	42	9		1	1	1	0.9	1	0	6
454	100	5046	1951-08-10	1	x	31.37	1	2007-12-01	2008-09-05	2011-04-16	42	9		1	1	1	0.9	1	0	6
455	101	5517	1940-01-07	1	2	60.7	1	2007-08-03	2008-03-13	2013-04-04	6.74	6	9	0	0	0	0.1	1	0	4
456	102	5517	1940-01-07	1	2	60.7	1	2007-08-03	2008-03-13	2013-04-04	6.74	6	9	0	0	0	0.1	1	0	4
457	103	5245	1945-12-25	1	2	84.2	1	2008-01-21	2008-03-25	2015-04-01	4.96	7	7	1	1	1	0.7	1	2	6
458	104	5245	1945-12-25	1	2	84.2	1	2008-01-21	2008-03-25	2015-04-01	4.96	7	7	1	1	1	0.7	1	2	6
459	105	5103	1939-01-23	1	x	27.6	1	2007-07-17	2008-05-09	2010-08-27	7.1	9	9	1	1	1	0.5	1	2	6
460	106	5103	1939-01-23	1	1	27.6	1	2007-07-17	2008-05-09	2010-08-27	7.1	9	9	1	1	1	0.5	1	2	6
461	107	5139	1937-04-23	1	1	79.2	1	1997-11-01	1998-07-01	2005-02-07	12.3	9		0				1	2	5
462	108	5139	1937-04-23	1	1	79.2	1	1997-11-01	1998-07-01	2005-02-07	12.3	9		0				1	2	5
463	109	5271	1936-05-08	1	x	9.93	1	2008-11-13	2008-12-24	2009-10-22	40.8	9	9	1	0	1	0.5	0	1	5
464	110	5271	1936-05-08	1	x	9.93	1	2008-11-13	2008-12-24	2009-10-22	40.8	9	9	1	0	1	0.5	0	1	5
465	111	5527	1939-09-03	1	1	42.33	1	2009-04-30	2009-06-23	2013-01-03	15.07	7	7	1	1	0	1	0	1	6
466	112	5527	1939-09-03	1	0	42.33	1	2009-04-30	2009-06-23	2013-01-03	15.07	7	7	1	1	0	1	0	1	6
467	113	1700	1908-07-31	1	2		0	1996-10-23		1998-08-18		8		0				0	0	1
468	114	1700	1908-07-31	1	x		0	1996-10-23		1998-08-18		8		0				0	0	1
469	115	1701	1907-10-07	1	0		0	1996-09-20		2000-07-19		9		0				0	0
470	116	1701	1907-10-07	1	0		0	1996-09-20		2000-07-19		9		0				0	0
471	117	2776	1923-07-11	1	0		0							0				0	0
472	118	2776	1923-07-11	1	1		0							0				0	0
473	119	2269	1929-08-02	1	x		1	1999-12-02		2009-11-05		10		0				1	2	1
474	120	2269	1929-08-02	1	2		1	1999-12-02		2009-11-05		10		0				1	2	1
475	121	5538	1952-03-10	1	x	14.07	1	2008-11-24	2009-07-07	2010-09-09	6.2	9	9	1	1	1	0.8	1	1	7
476	122	5538	1952-03-10	1	x	14.07	1	2008-11-24	2009-07-07	2010-09-09	6.2	9	9	1	1	1	0.8	1	1	7
477	123	6343	1952-12-01	0	2	5.7	1	2009-06-18	2009-08-25	2010-02-16	6	6	7	1	0	1	1	0	1	5
478	124	6343	1952-12-01	0	2	5.7	1	2009-06-18	2009-08-25	2010-02-16	6	6	7	1	0	1	1	0	1	5
479	125	5685	1939-11-17	0	3	66.5	1	2009-07-16	2009-10-27	2015-05-12	4.7	9	9	1	1	1	0.4	0	2	6
480	126	5685	1939-11-17	0	3	66.5	1	2009-07-16	2009-10-27	2015-05-12	4.7	9	9	1	1	1	0.4	0	2	6
481	127	6824	1947-05-10	1	2	20.5	1	2011-07-12	2011-09-08	2013-05-23	4.7	7	7	1	1	1	0.5	0	1	6
482	128	6824	1947-05-10	1	2	20.5	1	2011-07-12	2011-09-08	2013-05-23	4.7	7	7	1	1	1	0.5	0	1	6
483	129	2764	1948-10-18	1	x	218.77	1	1996-01-17	1997-02-19	2015-05-12	50	7		0			1	1	2	5
484	130	2764	1948-10-18	1	x	218.77	1	1996-01-17	1997-02-19	2015-05-12	50	7		0			1	1	2	5
485	131	1175	1927-03-31	1	0		0	1994-03-23			7.4	5		0			1	1	0	5
486	132	1175	1927-03-31	1	0		0	1994-03-23			7.4	5		0			1	1	0	5
487	133	3160	1949-06-20	1	0	11	1	2002-04-18	2002-10-08	2003-09-08	10.4	9	8	1	1	1	1	1	0	6
488	134	3160	1949-06-20	1	0	11	1	2002-04-18	2002-10-08	2003-09-08	10.4	9	8	1	1	1	1	1	0	6
489	135	6842	1933-01-08	1	x		1	2004-05-26		2013-07-10	27	7		0			0.9	1	0	2
490	136	6842	1933-01-08	1	x		1	2004-05-26		2013-07-10	27	7		0			0.9	1	0	2
491	137	1175	1927-03-31	1	1		0	1994-03-23			7.4	5		0			1	1	0	5
492	138	1175	1927-03-31	1	x		0	1994-03-23			7.4	5		0			1	1	0	5
493	139	6679	1933-03-26	1	0		0	1996-06-24			25.4	8		0			1	2	0	5
494	140	6679	1933-03-26	1	1		0	1996-06-24			25.4	8		0			1	2	0	5
495	141	5016	1940-08-24	1	3	61.33	0	2007-10-26	2008-01-11	2013-02-21	12.5	6	7	0	1	0	0.3	0	0	6
496	142	5016	1940-08-24	1	2	61.33	0	2007-10-26	2008-01-11	2013-02-21	12.5	6	7	0	1	0	0.3	0	0	6
497	143	5057	1934-01-31	1	1		1							0				0	0
498	144	5057	1934-01-31	1	x		1							0				0	0
499	145	4334	1936-10-21	1	1		1	1994-12-02				7		0			0.5	0	0
500	146	4334	1936-10-21	1	0		1	1994-12-02				7		0			0.5	0	0
501	147	4122	1932-05-19	1	1		0							0				0	0
502	148	4122	1932-05-19	1	2		0							0				0	0
503	149	2773	1944-03-18	1	1		1	1993-01-01		2003-08-03	82			0				1	2
504	150	2773	1944-03-18	1	0		1	1993-01-01		2003-08-03	82			0				1	2
505	151	2776	1923-07-11	1	x		0							0				0	0
506	152	2776	1923-07-11	1	x		0							0				0	0
507	153	5142	1930-10-07	1	3	196.57	1	1994-08-01	1995-03-02	2011-07-19		7		0	0	0		1	1	1
508	154	5142	1930-10-07	1	2	196.57	1	1994-08-01	1995-03-02	2011-07-19		7		0	0	0		1	1	1
509	155	5274	1913-02-24	1	1		0	2002-10-17		2015-02-02	47.4	6		0			1	1	0
510	156	5274	1913-02-24	1	x		0	2002-10-17		2015-02-02	47.4	6		0			1	1	0
511	157	4153	1930-11-17	1	1	11.03	1	2005-04-01	2008-12-22	2009-11-23		9	9	1	1	1	1	0	2	7
512	158	4153	1930-11-17	1	1	11.03	1	2005-04-01	2008-12-22	2009-11-23		9	9	1	1	1	1	0	2	7
513	159	6342	1966-06-11	1	3		1							0				0	0
514	160	6342	1966-06-11	1	3		1							0				0	0
515	161	5421	1941-10-10	1	1	53.9	1	2009-01-23	2009-03-31	2013-09-27	5.48	9	9	1	1	1	0.9	0	0	5
516	162	5421	1941-10-10	1	1	53.9	1	2009-01-23	2009-03-31	2013-09-27	5.48	9	9	1	1	1	0.9	0	0	5
517	163	3688	1940-07-26	1	2	3.9	1	2003-11-10	2009-04-21	2009-08-18	14.6	8		0	0	1	0.1	1	0	4
518	164	3688	1940-07-26	1	1	3.9	1	2003-11-10	2009-04-21	2009-08-18	14.6	8		0	0	1	0.1	1	0	4
519	165	5772	1940-09-04	1	x	22.2	1	2008-12-01	2009-05-19	2011-03-25	14	7	7	1	0	1	0.3	0	0	5
520	166	5772	1940-09-04	1	x	22.2	1	2008-12-01	2009-05-19	2011-03-25	14	7	7	1	0	1	0.3	0	0	5
521	167	6194	1920-06-05	1	1		1	2010-03-02		2011-10-25	78	9		0				2	0	3
522	168	6194	1920-06-05	1	1		1	2010-03-02		2011-10-25	78	9		0				2	0	3
523	169	5359	1936-09-15	1	2	14.3	1	2005-02-16	2010-11-29	2012-02-08	5.2	6	9	1	0	1	0.1	0	0	5
524	170	5359	1936-09-15	1	2	14.3	1	2005-02-16	2010-11-29	2012-02-08	5.2	6	9	1	0	1	0.1	0	0	5
525	171	6834	1946-09-06	1	2	19.3	0	2010-12-17	2012-02-14	2013-09-23		8		0				1	0	2
526	172	6834	1946-09-06	1	0	19.3	0	2010-12-17	2012-02-14	2013-09-23		8		0				1	0	2
527	173	6627	1947-06-22	1	x	41.9	1	2000-08-23	2001-01-01	2004-06-28	7.8	9		0			0.4	1	2	3
528	174	6627	1947-06-22	1	0	41.9	1	2000-08-23	2001-01-01	2004-06-28	7.8	9		0			0.4	1	2	3
529	175	6843	1927-07-31	1	3		1	2011-05-15		2011-09-08		10		0				1	0	1
530	176	6843	1927-07-31	1	3		1	2011-05-15		2011-09-08		10		0				1	0	1
532	1	5703	1946-11-18	0	1	1.3	0	2009-05-21	2009-12-10	2010-01-19	11.44	6	7	1	0	1	0.1	0	0	5
533	2	5703	1946-11-18	1	2	1.3	0	2009-05-21	2009-12-10	2010-01-19	11.44	6	7	1	0	1	0.1	0	0	5
534	3	5703	1946-11-18	1	1	1.3	0	2009-05-21	2009-12-10	2010-01-19	11.44	6	7	1	0	1	0.1	0	0	5
535	4	6876	1947-10-09	0	2	35.77	0	2011-03-28	2011-09-29	2014-09-22		7	7	0	0	0	0.6	0	0	4
536	5	6876	1947-10-09	1	0	35.77	0	2011-03-28	2011-09-29	2014-09-22		7	7	0	0	0	0.6	0	0	4
537	6	6876	1947-10-09	1	0	35.77	0	2011-03-28	2011-09-29	2014-09-22		7	7	0	0	0	0.6	0	0	4
538	7	6905	1954-02-27	0	1	12.53	0	2011-06-15	2011-10-13	2012-10-29	3.7	7	7	0	0	0	0.4	0	0	4
539	8	6905	1954-02-27	1	0	12.53	0	2011-06-15	2011-10-13	2012-10-29	3.7	7	7	0	0	0	0.4	0	0	4
540	9	6905	1954-02-27	1	1	12.53	0	2011-06-15	2011-10-13	2012-10-29	3.7	7	7	0	0	0	0.4	0	0	4
541	10	6878	1941-03-12	0	2	10.03	1	2011-06-07	2011-09-30	2012-08-01	5.6	7	6	0	0	0	0.1	0	0	4
542	11	6878	1941-03-12	1	2	10.03	1	2011-06-07	2011-09-30	2012-08-01	5.6	7	6	0	0	0	0.1	0	0	4
543	12	6878	1941-03-12	1	2	10.03	1	2011-06-07	2011-09-30	2012-08-01	5.6	7	6	0	0	0	0.1	0	0	4
544	13	6784	1963-12-22	0	0	8.03	0	2011-02-01	2011-08-09	2012-04-10	4.5	6	6	0	0	0	0.3	0	0	4
545	14	6784	1963-12-22	1	2	8.03	0	2011-02-01	2011-08-09	2012-04-10	4.5	6	6	0	0	0	0.3	0	0	4
546	15	6784	1963-12-22	1	2	8.03	0	2011-02-01	2011-08-09	2012-04-10	4.5	6	6	0	0	0	0.3	0	0	4
547	16	6858	1950-04-29	0	1	13.23	0	2011-05-31	2011-09-22	2012-10-29	4.65	7	6	0	0	0	0.2	0	0	4
548	17	6858	1950-04-29	0	x	13.23	0	2011-05-31	2011-09-22	2012-10-29	4.65	7	6	0	0	0	0.2	0	0	4
549	18	6858	1950-04-29	0	1	13.23	0	2011-05-31	2011-09-22	2012-10-29	4.65	7	6	0	0	0	0.2	0	0	4
550	19	5693	1950-02-13	0	0	58.4	0	2009-02-07	2009-11-26	2014-10-08	9.27	7	7	1	1	1	0.2	0	0	5
551	20	5693	1950-02-13	1	3	58.4	0	2009-02-07	2009-11-26	2014-10-08	9.27	7	7	1	1	1	0.2	0	0	5
552	21	5693	1950-02-13	1	1	58.4	0	2009-02-07	2009-11-26	2014-10-08	9.27	7	7	1	1	1	0.2	0	0	5
553	22	6879	1945-07-18	1	2	20.67	0	2011-07-12	2011-09-30	2013-06-20	7.31	7	7	0	0	0	1	0	0	4
554	23	6879	1945-07-18	1	1	20.67	0	2011-07-12	2011-09-30	2013-06-20	7.31	7	7	0	0	0	1	0	0	4
555	24	6879	1945-07-18	1	2	20.67	0	2011-07-12	2011-09-30	2013-06-20	7.31	7	7	0	0	0	1	0	0	4
556	25	6825	1956-10-16	0	0	37.4	0	2011-08-02	2011-09-08	2014-10-20	6.3	7	7	0	0	0	0.3	0	0	4
557	26	6825	1956-10-16	0	1	37.4	0	2011-08-02	2011-09-08	2014-10-20	6.3	7	7	0	0	0	0.3	0	0	4
558	27	6825	1956-10-16	0	3	37.4	0	2011-08-02	2011-09-08	2014-10-20	6.3	7	7	0	0	0	0.3	0	0	4
559	28	6757	1953-12-15	0	2	36.67	0	2011-04-20	2011-07-21	2014-08-11	8	7	7	0	0	0	0.1	0	0	4
560	29	6757	1953-12-15	1	3	36.67	0	2011-04-20	2011-07-21	2014-08-11	8	7	7	0	0	0	0.1	0	0	4
561	30	6757	1953-12-15	1	3	36.67	0	2011-04-20	2011-07-21	2014-08-11	8	7	7	0	0	0	0.1	0	0	4
562	31	5680	1948-02-25	0	2	7.67	0	2009-09-01	2009-11-17	2010-07-07	5.75	8	8	0		1	0.1	0	0	4
563	32	5680	1948-02-25	1	3	7.67	0	2009-09-01	2009-11-17	2010-07-07	5.75	8	8	0		1	0.1	0	0	4
564	33	5680	1948-02-25	1	2	7.67	0	2009-09-01	2009-11-17	2010-07-07	5.75	8	8	0		1	0.1	0	0	4
565	34	5681	1946-02-18	0	0	39.5	0	2009-03-10	2009-11-19	2013-03-04	3	6	7	0	0	0	0.1	0	0	4
566	35	5681	1946-02-18	0	0	39.5	0	2009-03-10	2009-11-19	2013-03-04	3	6	7	0	0	0	0.1	0	0	4
567	36	5681	1946-02-18	1	2	39.5	0	2009-03-10	2009-11-19	2013-03-04	3	6	7	0	0	0	0.1	0	0	4
568	37	6982	1953-09-29	0	0		0	2011-07-06	2011-10-28	2011-10-28	7.5	6	7	1	0	1	0.6	0	0	5
569	38	6982	1953-09-29	1	0		0	2011-07-06	2011-10-28	2011-10-28	7.5	6	7	1	0	1	0.6	0	0	5
570	39	6982	1953-09-29	1	0		0	2011-07-06	2011-10-28	2011-10-28	7.5	6	7	1	0	1	0.6	0	0	5
571	40	6874	1943-10-01	0	2	36.37	0	2011-08-11	2011-09-27	2014-10-08	3.2	7	7	0	0	0	0.6	0	0	4
572	41	6874	1943-10-01	1	0	36.37	0	2011-08-11	2011-09-27	2014-10-08	3.2	7	7	0	0	0	0.6	0	0	4
573	42	6874	1943-10-01	1	0	36.37	0	2011-08-11	2011-09-27	2014-10-08	3.2	7	7	0	0	0	0.6	0	0	4
574	43	5309	1943-05-02	0	1	3.2	0	2007-09-18	2008-01-22	2008-04-28	6.06	6	6	0	0	0	0.5	0	0	4
575	44	5309	1943-05-02	1	1	3.2	0	2007-09-18	2008-01-22	2008-04-28	6.06	6	6	0	0	0	0.5	0	0	4
576	45	5309	1943-05-02	1	0	3.2	0	2007-09-18	2008-01-22	2008-04-28	6.06	6	6	0	0	0	0.5	0	0	4
577	46	6983	1943-03-19	0	0	4.57	0	2011-07-20	2011-10-28	2012-03-15	7.75	7	7	1	1	0	0.3	0	0	5
578	47	6983	1943-03-19	1	2	4.57	0	2011-07-20	2011-10-28	2012-03-15	7.75	7	7	1	1	0	0.3	0	0	5
579	48	6983	1943-03-19	1	3	4.57	0	2011-07-20	2011-10-28	2012-03-15	7.75	7	7	1	1	0	0.3	0	0	5
580	49	6958	1942-04-08	0	1	39.53	0	2011-06-23	2011-09-29	2015-01-15	5.97	7	7	0	0	0	0.3	0	0	4
581	50	6958	1942-04-08	0	1	39.53	0	2011-06-23	2011-09-29	2015-01-15	5.97	7	7	0	0	0	0.3	0	0	4
582	51	6958	1942-04-08	0	1	39.53	0	2011-06-23	2011-09-29	2015-01-15	5.97	7	7	0	0	0	0.3	0	0	4
583	52	6893	1951-05-25	0	0	25.63	0	2011-06-02	2011-10-06	2013-11-25	5.7	7	7	0	0	0	0.3	0	0	4
584	53	6893	1951-05-25	0	0	25.63	0	2011-06-02	2011-10-06	2013-11-25	5.7	7	7	0	0	0	0.3	0	0	4
585	54	6893	1951-05-25	1	2	25.63	0	2011-06-02	2011-10-06	2013-11-25	5.7	7	7	0	0	0	0.3	0	0	4
586	55	6774	1948-11-07	0	3	30.67	0	2011-02-21	2011-08-04	2014-02-24	9.8	7	7	0	0	0	0.3	0	0	4
587	56	6774	1948-11-07	1	3	30.67	0	2011-02-21	2011-08-04	2014-02-24	9.8	7	7	0	0	0	0.3	0	0	4
588	57	6774	1948-11-07	1	3	30.67	0	2011-02-21	2011-08-04	2014-02-24	9.8	7	7	0	0	0	0.3	0	0	4
589	58	5308	1940-08-29	0	0	75.6	0	2007-04-10	2008-01-10	2014-04-28	14	7	7	0	0	1	0.1	0	0	4
590	59	5308	1940-08-29	1	2	75.6	0	2007-04-10	2008-01-10	2014-04-28	14	7	7	0	0	1	0.1	0	0	4
591	60	5308	1940-08-29	1	2	75.6	0	2007-04-10	2008-01-10	2014-04-28	14	7	7	0	0	1	0.1	0	0	4
592	61	5689	1947-05-29	1	0	9.43	0	2009-06-15	2009-11-24	2010-09-07	7.47	7	7	0	0	1	0.1	0	0	4
593	62	5689	1947-05-29	1	3	9.43	0	2009-06-15	2009-11-24	2010-09-07	7.47	7	7	0	0	1	0.1	0	0	4
594	63	5689	1947-05-29	1	2	9.43	0	2009-06-15	2009-11-24	2010-09-07	7.47	7	7	0	0	1	0.1	0	0	4
595	64	6749	1953-02-27	0	1	24.5	0	2011-03-30	2011-11-03	2013-11-18	4.1	6	7	0	0	0	0.6	0	0	4
596	65	6749	1953-02-27	0	1	24.5	0	2011-03-30	2011-11-03	2013-11-18	4.1	6	7	0	0	0	0.6	0	0	4
597	66	6749	1953-02-27	0	1	24.5	0	2011-03-30	2011-11-03	2013-11-18	4.1	6	7	0	0	0	0.6	0	0	4
598	67	5683	1960-08-27	0	1	18.13	0	2009-10-06	2009-11-10	2011-05-14	6.8	7	7	0	0	0	0.5	0	0	4
599	68	5683	1960-08-27	1	3	18.13	0	2009-10-06	2009-11-10	2011-05-14	6.8	7	7	0	0	0	0.5	0	0	4
600	69	5683	1960-08-27	1	3	18.13	0	2009-10-06	2009-11-10	2011-05-14	6.8	7	7	0	0	0	0.5	0	0	4
601	70	6626	1949-08-01	0	2	27.07	0	2011-04-07	2011-08-04	2013-11-06	8.55	7	7	1	0	1	0.1	0	0	5
602	71	6626	1949-08-01	1	3	27.07	0	2011-04-07	2011-08-04	2013-11-06	8.55	7	7	1	0	1	0.1	0	0	5
603	72	6626	1949-08-01	1	2	27.07	0	2011-04-07	2011-08-04	2013-11-06	8.55	7	7	1	0	1	0.1	0	0	5
604	73	5295	1941-01-02	0	1	86.1	0	2007-10-04	2008-01-03	2015-03-06	2	7	7	0	0	0	0.3	0	0	4
605	74	5295	1941-01-02	1	1	86.1	0	2007-10-04	2008-01-03	2015-03-06	2	7	7	0	0	0	0.3	0	0	4
606	75	5295	1941-01-02	1	1	86.1	0	2007-10-04	2008-01-03	2015-03-06	2	7	7	0	0	0	0.3	0	0	4
607	76	6808	1962-08-29	0	1	40.77	0	2011-07-04	2011-08-22	2015-01-15	26	8	7	1	0	1	0.2	0	0	5
608	77	6808	1962-08-29	1	2	40.77	0	2011-07-04	2011-08-22	2015-01-15	26	8	7	1	0	1	0.2	0	0	5
609	78	6808	1962-08-29	1	2	40.77	0	2011-07-04	2011-08-22	2015-01-15	26	8	7	1	0	1	0.2	0	0	5
610	79	5535	1947-07-02	1	0	29.3	0		2009-01-08	2011-06-17	7.5	7	7	0	0	0	0.1	0	0	2
611	80	5535	1947-07-02	1	2	29.3	0		2009-01-08	2011-06-17	7.5	7	7	0	0	0	0.1	0	0	2
612	81	5535	1947-07-02	1	2	29.3	0		2009-01-08	2011-06-17	7.5	7	7	0	0	0	0.1	0	0	2
613	82	6958	1942-04-08	0	1	39.53	0	2011-06-23	2011-09-29	2015-01-15	5.97	7	7	0	0	0	0.3	0	0	4
614	83	6874	1943-10-01	1	1	36.37	0	2011-08-11	2011-09-27	2014-10-08	3.2	7	7	0	0	0	0.6	0	0	4
615	84	6893	1951-05-25	0	1	25.63	0	2011-06-02	2011-10-06	2013-11-25	5.7	7	7	0	0	0	0.3	0	0	4
616	85	5309	1943-05-02	1	1	3.2	0	2007-09-18	2008-01-22	2008-04-28	6.06	6	6	0	0	0	0.5	0	0	4
617	86	6876	1947-10-09	0	1	35.77	0	2011-03-28	2011-09-29	2014-09-22		7	7	0	0	0	0.6	0	0	4
618	87	6770	1946-02-10	1	2	43.33	0	2011-06-22	2011-08-02	2015-03-12	8.1	8	9	1	1	1	0.3	1	0	6
619	88	6770	1946-02-10	1	1	43.33	0	2011-06-22	2011-08-02	2015-03-12	8.1	8	9	1	1	1	0.3	1	0	6
620	89	5877	1951-06-01	1	1	11.13	1	2009-08-26	2010-05-31	2011-05-04	32.25	9		0	1	1	1	1	0	6
621	90	5877	1951-06-01	1	1	11.13	1	2009-08-26	2010-05-31	2011-05-04	32.25	9		0	1	1	1	1	0	6
622	91	6112	1940-10-16	1	2	54.73	0	2010-04-16	2010-07-26	2015-02-18	8.1	9		1	0	0	0.5	1	0	5
623	92	6112	1940-10-16	1	1	54.73	0	2010-04-16	2010-07-26	2015-02-18	8.1	9		1	0	0	0.5	1	0	5
624	93	5120	1944-03-11	0	1	11.47	1	2008-07-07	2008-10-21	2009-10-05	6.2	8		0	0	0	0.4	2	1	4
625	94	5120	1944-03-11	0	2	11.47	1	2008-07-07	2008-10-21	2009-10-05	6.2	8		0	0	0	0.4	2	1	4
626	95	6755	1954-01-20	1	2	38.17	0	2011-02-02	2011-07-19	2014-09-24	6.9	7		0	0	0	0.6	1	0	4
627	96	6755	1954-01-20	1	2	38.17	0	2011-02-02	2011-07-19	2014-09-24	6.9	7		0	0	0	0.6	1	0	4
628	97	5779	1953-02-01	1	2	59.6	1	2009-08-26	2009-11-03	2014-10-21	6.3	7	7	1	1	0	0.8	0	1	6
629	98	5779	1953-02-01	1	1	59.6	1	2009-08-26	2009-11-03	2014-10-21	6.3	7	7	1	1	0	0.8	0	1	6
630	99	5735	1948-05-13	1	2	18.77	1	2009-10-07	2010-03-10	2011-10-03	34	9	9	1	1	0	0.6	1	1	6
631	100	5735	1948-05-13	1	0	18.77	1	2009-10-07	2010-03-10	2011-10-03	34	9	9	1	1	0	0.6	1	1	6
632	101	6106	1941-10-16	1	0	58.43	1	2010-02-10	2010-07-14	2015-05-27	24.48	7	7	1	1	1	0.8	1	1	6
633	102	6106	1941-10-16	1	0	58.43	1	2010-02-10	2010-07-14	2015-05-27	24.48	7	7	1	1	1	0.8	1	1	6
634	103	6765	1942-01-27	1	2		1	2010-04-13	2010-07-14	2010-07-14	32	8	9	0	1	1	0.6	0	1	6
635	104	6765	1942-01-27	1	1		1	2010-04-13	2010-07-14	2010-07-14	32	8	9	0	1	1	0.6	0	1	6
636	105	6364	1946-03-15	1	1	24.03	1	2008-11-18	2010-09-23	2012-09-24	11.7	9		1	1	1	0.3	1	1	5
637	106	6364	1946-03-15	1	1	24.03	1	2008-11-18	2010-09-23	2012-09-24	11.7	9		1	1	1	0.3	1	1	5
638	107	6274	1951-06-16	1	1		0	2010-08-06	2010-11-02	2010-11-02	27.5	7	9	1	0	1	0.7	0	0	5
639	108	6274	1951-06-16	1	2		0	2010-08-06	2010-11-02	2010-11-02	27.5	7	9	1	0	1	0.7	0	0	5
640	109	6956	1946-10-11	1	2	33.83	1	2010-11-04	2010-12-21	2013-10-16	11.95	8	9	1	1	1	0.2	0	1	6
641	110	6956	1946-10-11	1	2	33.83	1	2010-11-04	2010-12-21	2013-10-16	11.95	8	9	1	1	1	0.2	0	1	6
642	111	6387	1941-07-26	1	0	43.5	1	2010-10-28	2011-01-26	2014-09-11	9.2	7	9	1	1	1	0.2	0	1	6
643	112	6387	1941-07-26	1	1	43.5	1	2010-10-28	2011-01-26	2014-09-11	9.2	7	9	1	1	1	0.2	0	1	6
644	113	640	1929-07-04	1	2		1							0				0	0
645	114	640	1929-07-04	1	1		1							0				0	0
646	115	6436	1940-03-12	1	1	22.4	1	2010-12-06	2011-02-01	2012-12-13	6.7	7	7	1	1	1	1	0	1	6
647	116	6436	1940-03-12	1	1	22.4	1	2010-12-06	2011-02-01	2012-12-13	6.7	7	7	1	1	1	1	0	1	6
648	117	6525	1962-05-10	1	2	11.8	1	2011-01-21	2011-03-07	2012-03-01	15	7	9	1	1	1	0.8	0	1	6
649	118	6525	1962-05-10	1	2	11.8	1	2011-01-21	2011-03-07	2012-03-01	15	7	9	1	1	1	0.8	0	1	6
650	119	6535	1942-10-28	1	2	21.77	1	2010-06-30	2011-03-17	2013-01-10	79.9	9		1	1	1	0.8	1	1	6
651	120	6535	1942-10-28	1	2	21.77	1	2010-06-30	2011-03-17	2013-01-10	79.9	9		1	1	1	0.8	1	1	6
652	121	6564	1947-03-02	1	2	10.27	1	2011-02-02	2011-04-08	2012-02-16	5.4	9	9	1	0	0	0.3	0	1	5
653	122	6564	1947-03-02	1	2	10.27	1	2011-02-02	2011-04-08	2012-02-16	5.4	9	9	1	0	0	0.3	0	1	5
654	123	6574	1943-01-05	1	1	10.53	1	2011-02-08	2011-04-11	2012-02-27	13	10	9	1	1	0	0.7	0	1	7
655	124	6574	1943-01-05	1	1	10.53	1	2011-02-08	2011-04-11	2012-02-27	13	10	9	1	1	0	0.7	0	1	7
656	125	6616	1949-11-11	1	0	18.5	1	2011-04-12	2011-05-19	2012-12-04	9.61	8	9	0	0	1	0.3	0	1	4
657	126	6616	1949-11-11	1	0	18.5	1	2011-04-12	2011-05-19	2012-12-04	9.61	8	9	0	0	1	0.3	0	1	4
658	127	6697	1939-05-11	1	1	8.73	1	2011-04-05	2011-06-06	2012-02-28	5.8	9	9	1	0	1	0.3	0	0	5
659	128	6697	1939-05-11	1	1	8.73	1	2011-04-05	2011-06-06	2012-02-28	5.8	9	9	1	0	1	0.3	0	0	5
660	129	1387	1919-09-14	1	2		0	1995-03-29				9		0			0.2	0	0
661	130	1387	1919-09-14	1	1		0	1995-03-29				9		0			0.2	0	0
662	131	1517	1930-10-15	1	0		1	1995-10-20	1995-12-29			5	4	0	0	1		0	0	4
663	132	1517	1930-10-15	1	0		1	1995-10-20	1995-12-29			5	4	0	0	1		0	0	4
664	133	1626	1930-05-30	1	0	73.77	0	1996-06-12	1996-10-10	2002-12-03	40	8	7	0	0	0		1	0	2
665	134	1626	1930-05-30	1	1	73.77	0	1996-06-12	1996-10-10	2002-12-03	40	8	7	0	0	0		1	0	2
666	135	1701	1907-10-07	1	2		0	1996-09-20		2000-07-19		9		0				0	0
667	136	1701	1907-10-07	1	1		0	1996-09-20		2000-07-19		9		0				0	0
668	137	5094	1950-07-21	1	1	28.97	1	2008-04-07	2008-07-17	2010-12-16	31.26	7	9	1	0	1	0.9	0	0	5
669	138	5094	1950-07-21	1	1	28.97	1	2008-04-07	2008-07-17	2010-12-16	31.26	7	9	1	0	1	0.9	0	0	5
670	139	4999	1945-09-02	1	x	10.37	1	2007-09-11	2008-07-29	2009-06-10	3.3	7	8	1	0	1	0.2	1	0	5
671	140	4999	1945-09-02	1	3	10.37	1	2007-09-11	2008-07-29	2009-06-10	3.3	7	8	1	0	1	0.2	1	0	5
672	141	5053	1940-01-09	1	x	20.67	1	2008-01-24	2008-06-03	2010-02-23	4.32	7	7	0	0	0	0.2	0	0	4
673	142	5053	1940-01-09	1	2	20.67	1	2008-01-24	2008-06-03	2010-02-23	4.32	7	7	0	0	0	0.2	0	0	4
674	143	5121	1935-03-01	1	1		1	2008-07-09	2009-01-30			10		0				1	0	2
675	144	5121	1935-03-01	1	x		1	2008-07-09	2009-01-30			10		0				1	0	2
676	145	2504	1938-03-10	1	2	99.03	0	1999-12-15	2000-10-12	2009-01-13	41	7		0	0	0	0.4	1	0	4
677	146	2504	1938-03-10	1	0	99.03	0	1999-12-15	2000-10-12	2009-01-13	41	7		0	0	0	0.4	1	0	4
678	147	2269	1929-08-02	1	1		1	1999-12-02		2009-11-05		10		0				1	2	1
679	148	2269	1929-08-02	1	1		1	1999-12-02		2009-11-05		10		0				1	2	1
680	149	2776	1923-07-11	1	1		0							0				0	0
681	150	2776	1923-07-11	1	1		0							0				0	0
682	151	2774	1928-10-10	1	1		1			2001-07-10		8		0				1	0	5
683	152	2774	1928-10-10	1	2		1			2001-07-10		8		0				1	0	5
684	153	5628	1944-11-22	1	2	28.33	1	2009-05-29	2009-09-01	2012-01-11	3.17	9	9	1	1	1	0.8	1	2	6
685	154	5628	1944-11-22	1	2	28.33	1	2009-05-29	2009-09-01	2012-01-11	3.17	9	9	1	1	1	0.8	1	2	6
686	155	1280	1936-07-31	1	x	22.87	1	1994-08-23	1994-10-11	1996-09-07	32	7	6	1	0	1	0.2	0	0	5
687	156	1280	1936-07-31	1	1	22.87	1	1994-08-23	1994-10-11	1996-09-07	32	7	6	1	0	1	0.2	0	0	5
688	157	4153	1930-11-17	1	1	11.03	1	2005-04-01	2008-12-22	2009-11-23		9	9	1	1	1	1	0	2	7
689	158	4153	1930-11-17	1	0	11.03	1	2005-04-01	2008-12-22	2009-11-23		9	9	1	1	1	1	0	2	7
690	159	5695	1944-04-22	1	2	62.87	0	2009-08-17	2009-10-23	2015-01-19	4.6	8	9	1	0	0	0.8	0	0	5
691	160	5695	1944-04-22	1	1	62.87	0	2009-08-17	2009-10-23	2015-01-19	4.6	8	9	1	0	0	0.8	0	0	5
692	161	1175	1927-03-31	1	2		0	1994-03-23			7.4	5		0			1	1	0	5
693	162	1175	1927-03-31	1	2		0	1994-03-23			7.4	5		0			1	1	0	5
694	163	1518	1921-06-21	1	2		0							0				0	0
695	164	1518	1921-06-21	1	1		0							0				0	0
696	165	5258	1929-01-25	1	2		1	1995-11-30			10.1			0				0	0
697	166	5258	1929-01-25	1	1		1	1995-11-30			10.1			0				0	0
698	167	2764	1948-10-18	1	2	218.77	1	1996-01-17	1997-02-19	2015-05-12	50	7		0			1	1	2	5
699	168	2764	1948-10-18	1	x	218.77	1	1996-01-17	1997-02-19	2015-05-12	50	7		0			1	1	2	5
700	169	6270	1931-05-09	1	2		1	2007-01-01		2010-03-03	250			0				1	1
701	170	6270	1931-05-09	1	2		1	2007-01-01		2010-03-03	250			0				1	1
702	171	3603	1930-10-25	1	1	34.87	1	2003-08-21	2004-05-31	2007-04-26	6.7	10		0			0.8	1	2	4
703	172	3603	1930-10-25	1	1	34.87	1	2003-08-21	2004-05-31	2007-04-26	6.7	10		0			0.8	1	2	4
704	173	5105	1932-08-09	1	1	1.13	1	2008-05-13	2008-05-12	2008-06-16	15	9		0			1	0	1	4
705	174	5105	1932-08-09	1	1	1.13	1	2008-05-13	2008-05-13	2008-06-17	15	9		0			1	0	1	4
706	175	6951	1947-08-12	1	1		1	2010-09-26		2012-05-10	71	8		0				1	2	5
707	176	6951	1947-08-12	1	3		1	2010-09-26		2012-05-10	71	8		0				1	2	5
709	1	5528	1952-05-14	1	1	69.27	0	2008-11-06	2009-06-23	2015-04-01	36.43	7	7	1	0	0	0.2	2	0	5
710	2	5528	1952-05-14	1	1	69.27	0	2008-11-06	2009-06-23	2015-04-01	36.43	7	7	1	0	0	0.2	2	0	5
711	3	5575	1940-06-04	1	x	56.97	1	2008-10-21	2009-07-16	2014-04-15	11.8	8		1	0	0	0.5	2	0	5
712	4	5575	1940-06-04	1	1	56.97	1	2008-10-21	2009-07-16	2014-04-15	11.8	8		1	0	0	0.5	2	0	5
713	5	5538	1952-03-10	1	x	14.07	1	2008-11-24	2009-07-07	2010-09-09	6.2	9	9	1	1	1	0.8	2	1	7
714	6	5538	1952-03-10	1	x	14.07	1	2008-11-24	2009-07-07	2010-09-09	6.2	9	9	1	1	1	0.8	2	1	7
715	7	5917	1942-06-05	1	x	65.6	0	2009-04-09	2009-10-13	2015-03-31	11	9	9	0	0	0	0.4	2	0	2
716	8	5917	1942-06-05	1	1	65.6	0	2009-04-09	2009-10-13	2015-03-31	11	9	9	0	0	0	0.4	2	0	2
717	9	5826	1954-05-21	1	2	58.67	0	2009-07-21	2010-01-12	2014-12-02	17.48	8	9	1	0	0	0.6	2	0	5
718	10	5826	1954-05-21	1	2	58.67	0	2009-07-21	2010-01-12	2014-12-02	17.48	8	9	1	0	0	0.6	2	0	5
719	11	5877	1951-06-01	1	1	11.13	1	2009-08-26	2010-05-31	2011-05-04	32.25	9		0	1	1	1	2	0	6
720	12	5877	1951-06-01	1	1	11.13	1	2009-08-26	2010-05-31	2011-05-04	32.25	9		0	1	1	1	2	0	6
721	13	5740	1948-07-04	1	x	59.8	0	2009-05-14	2010-05-10	2015-05-04	5.6	8		0	0	0	0.3	2	0	2
722	14	5740	1948-07-04	1	x	59.8	0	2009-05-14	2010-05-10	2015-05-04	5.6	8		0	0	0	0.3	2	0	2
723	15	6124	1948-02-25	1	1	43.93	0	2009-12-18	2010-08-05	2014-04-03	22.14	9		0	0	0	0.5	2	0	4
724	16	6124	1948-02-25	1	1	43.93	0	2009-12-18	2010-08-05	2014-04-03	22.14	9		0	0	0	0.5	2	0	4
725	17	5908	1947-07-15	1	1	52.87	0	2009-12-21	2010-04-27	2014-09-23	16.74	8	8	0	0	0	0.2	2	0	2
726	18	5908	1947-07-15	1	2	52.87	0	2009-12-21	2010-04-27	2014-09-23	16.74	8	8	0	0	0	0.2	2	0	2
727	19	6164	1936-03-28	1	2	27.27	1	2010-01-13	2010-08-26	2012-12-04	6.3	8	9	1	1	0	0.5	2	0	5
728	20	6164	1936-03-28	1	2	27.27	1	2010-01-13	2010-08-26	2012-12-04	6.3	8	9	1	1	0	0.5	2	0	5
729	21	6252	1946-05-25	1	x	51.43	0	2010-03-18	2010-10-29	2015-02-12	10.9	8		0	0	0	0.4	2	0	4
730	22	6252	1946-05-25	1	0	51.43	0	2010-03-18	2010-10-29	2015-02-12	10.9	8		0	0	0	0.4	2	0	4
731	23	6129	1945-07-15	1	1	50.23	1	2010-04-22	2010-11-16	2015-01-23	5.99	9		0	0	1	0.6	2	0	4
732	24	6129	1945-07-15	1	1	50.23	1	2010-04-22	2010-11-16	2015-01-23	5.99	9		0	0	1	0.6	2	0	4
733	25	6474	1947-08-09	1	0	50.23	0	2010-06-24	2011-02-14	2015-04-21	6.2	9	7	1	0	0	0.3	2	0	5
734	26	6474	1947-08-09	1	0	50.23	0	2010-06-24	2011-02-14	2015-04-21	6.2	9	7	1	0	0	0.3	2	0	5
735	27	6334	1960-05-14	1	1	11.97	1	2010-10-12	2011-05-02	2012-05-01	9.9	9	7	0	0	0	0.4	2	0	2
736	28	6334	1960-05-14	1	1	11.97	1	2010-10-12	2011-05-02	2012-05-01	9.9	9	7	0	0	0	0.4	2	0	2
737	29	6501	1961-09-06	1	2	13.43	1	2010-12-14	2011-07-22	2012-09-05	44.38	8		1	1	1	1	2	1	6
738	30	6501	1961-09-06	1	2	13.43	1	2010-12-14	2011-07-22	2012-09-05	44.38	8		1	1	1	1	2	1	6
739	31	6764	1936-02-25	1	1	44.2	0	2011-01-11	2011-07-25	2015-04-01	13	9		1	0	1	0.4	2	0	5
740	32	6764	1936-02-25	1	1	44.2	0	2011-01-11	2011-07-25	2015-04-01	13	9		1	0	1	0.4	2	0	5
741	33	6979	1929-09-11	1	1	22.1	1	2007-12-20	2012-11-15	2014-09-18	2.6	9		0			1	2	2	4
742	34	6979	1929-09-11	1	1	22.1	1	2007-12-20	2012-11-15	2014-09-18	2.6	9		0			1	2	2	4
743	35	7069	1962-03-22	1	0	41.27	0	2011-05-20	2011-12-19	2015-05-27	26.2	9		1	1	0	0.7	2	0	6
744	36	7069	1962-03-22	1	0	41.27	0	2011-05-20	2011-12-19	2015-05-27	26.2	9		1	1	0	0.7	2	0	6
745	37	7202	1948-10-29	1	0	21.4	1	2011-06-30	2012-02-21	2013-12-03	6.95	9	9	1	1	0	0.8	2	1	6
746	38	7202	1948-10-29	1	1	21.4	1	2011-06-30	2012-02-21	2013-12-03	6.95	9	9	1	1	0	0.8	2	1	6
747	39	7002	1951-06-26	1	0	31.27	0	2011-10-13	2012-04-24	2014-12-02	17.1	9		1	1	0	0.5	2	0	5
748	40	7002	1951-06-26	1	0	31.27	0	2011-10-13	2012-04-24	2014-12-02	17.1	9		1	1	0	0.5	2	0	5
749	41	7311	1954-10-05	1	2	24.7	1	2012-01-06	2012-07-10	2014-07-31	11	9		0	0	0	0.3	2	0	4
750	42	7311	1954-10-05	1	3	24.7	1	2012-01-06	2012-07-10	2014-07-31	11	9		0	0	0	0.3	2	0	4
751	43	7448	1949-04-23	1	1	28.7	1	2011-12-13	2012-08-28	2015-01-19	13	8		0	0	0	0.4	2	1	4
752	44	7448	1949-04-23	1	1	28.7	1	2011-12-13	2012-08-28	2015-01-19	13	8		0	0	0	0.4	2	1	4
753	45	5479	1947-04-17	1	2	57.1	0	2008-08-13	2008-11-04	2013-08-07	6	9	7	1	0	0	0.9	1	0	5
754	46	5479	1947-04-17	1	2	57.1	0	2008-08-13	2008-11-04	2013-08-07	6	9	7	1	0	0	0.9	1	0	5
755	47	5346	1947-08-19	1	3	69.53	0	2008-11-28	2009-03-03	2014-12-19	5.7	9	9	1	1	0	0.8	0	0	6
756	48	5346	1947-08-19	1	3	69.53	0	2008-11-28	2009-03-03	2014-12-19	5.7	9	9	1	1	0	0.8	0	0	6
757	49	5421	1941-10-10	1	3	53.9	1	2009-01-23	2009-03-31	2013-09-27	5.48	9	9	1	1	1	0.9	0	0	5
758	50	5421	1941-10-10	1	2	53.9	1	2009-01-23	2009-03-31	2013-09-27	5.48	9	9	1	1	1	0.9	0	0	5
759	51	5478	1956-10-12	1	3	52.5	0	2009-02-03	2009-04-14	2013-08-29	26.06	9	7	0	0	1	0.8	0	0	4
760	52	5478	1956-10-12	1	2	52.5	0	2009-02-03	2009-04-14	2013-08-29	26.06	9	7	0	0	1	0.8	0	0	4
761	53	5427	1945-12-21	1	2	49.17	0	2007-12-04	2009-04-23	2013-05-28	5.2	7	9	1	0	0	0.6	0	0	5
762	54	5427	1945-12-21	1	2	49.17	0	2007-12-04	2009-04-23	2013-05-28	5.2	7	9	1	0	0	0.6	0	0	5
763	55	5530	1963-10-05	1	2	2.93	1	2009-05-21	2009-06-23	2009-09-21	6.3	10	10	1	1	1	0.8	1	1	6
764	56	5530	1963-10-05	1	2	2.93	1	2009-05-21	2009-06-23	2009-09-21	6.3	10	10	1	1	1	0.8	1	1	6
765	57	5628	1944-11-22	1	2	28.33	1	2009-05-29	2009-09-01	2012-01-11	3.17	9	9	1	1	1	0.8	1	2	6
766	58	5628	1944-11-22	1	2	28.33	1	2009-05-29	2009-09-01	2012-01-11	3.17	9	9	1	1	1	0.8	1	2	6
767	59	5695	1944-04-22	1	2	62.87	0	2009-08-17	2009-10-23	2015-01-19	4.6	8	9	1	0	0	0.8	0	0	5
768	60	5695	1944-04-22	1	2	62.87	0	2009-08-17	2009-10-23	2015-01-19	4.6	8	9	1	0	0	0.8	0	0	5
769	61	5755	1956-06-22	1	2	55.17	1	2009-12-09	2010-02-11	2014-09-16	9.5	7	7	1	0	1	0.9	0	0	7
770	62	5755	1956-06-22	1	2	55.17	1	2009-12-09	2010-02-11	2014-09-16	9.5	7	7	1	0	1	0.9	0	0	7
771	63	5784	1957-03-14	1	2	58.6	0	2009-12-15	2010-03-10	2015-01-28	25	6	7	0	0	0	0.9	0	0	4
772	64	5784	1957-03-14	1	2	58.6	0	2009-12-15	2010-03-10	2015-01-28	25	6	7	0	0	0	0.9	0	0	4
773	65	6084	1960-01-26	1	2	49.17	0	2010-04-19	2010-07-23	2014-08-28	8.7	7	9	1	0	0	0.7	0	0	5
774	66	6084	1960-01-26	1	2	49.17	0	2010-04-19	2010-07-23	2014-08-28	8.7	7	9	1	0	0	0.7	0	0	5
775	67	6113	1940-11-13	1	1	55.27	0	2010-05-28	2010-07-26	2015-03-04	12.5	9	7	1	1	0	0.8	0	0	5
776	68	6113	1940-11-13	1	3	55.27	0	2010-05-28	2010-07-26	2015-03-04	12.5	9	7	1	1	0	0.8	0	0	5
777	69	6152	1949-03-12	1	1	43.43	1	2010-05-26	2010-08-19	2014-04-02	13.3	7	7	1	0	0	0.4	0	0	4
778	70	6152	1949-03-12	1	1	43.43	1	2010-05-26	2010-08-19	2014-04-02	13.3	7	7	1	0	0	0.4	0	0	4
779	71	6196	1957-07-13	1	2	52.83	1	2010-06-30	2010-09-07	2015-02-02	9.9	10	10	1	1	1	1	0	1	6
780	72	6196	1957-07-13	1	2	52.83	1	2010-06-30	2010-09-07	2015-02-02	9.9	10	10	1	1	1	1	0	1	6
781	73	6564	1947-03-02	1	3	10.27	1	2011-02-02	2011-04-08	2012-02-16	5.4	9	9	1	0	0	0.3	0	1	5
782	74	6196	1957-07-13	1	3	52.83	1	2010-06-30	2010-09-07	2015-02-02	9.9	10	10	1	1	1	1	0	1	6
783	75	6723	1947-08-17	1	1	44.2	1	2011-03-08	2011-06-28	2015-03-04	8.9	9		1	1	1	0.4	1	1	5
784	76	6723	1947-08-17	1	1	44.2	1	2011-03-08	2011-06-28	2015-03-04	8.9	9		1	1	1	0.4	1	1	5
785	77	6807	1954-10-28	1	x	37.83	0	2011-07-05	2011-08-22	2014-10-17	5	9	9	1	1	0	0.3	0	0	5
786	78	6807	1954-10-28	1	2	37.83	0	2011-07-05	2011-08-22	2014-10-17	5	9	9	1	1	0	0.3	0	0	5
787	79	6803	1952-06-07	1	2	15.43	1	2011-07-12	2011-08-17	2012-11-30	5.53	9	9	1	1	1	0.7	0	0	6
788	80	6803	1952-06-07	1	3	15.43	1	2011-07-12	2011-08-17	2012-11-30	5.53	9	9	1	1	1	0.7	0	0	6
789	81	7025	1953-01-09	1	3	38.03	0	2011-09-22	2011-12-15	2015-02-16	5.7	8	7	1	0	1	0.4	0	0	5
790	82	7025	1953-01-09	1	3	38.03	0	2011-09-22	2011-12-15	2015-02-16	5.7	8	7	1	0	1	0.4	0	0	5
791	83	7050	1954-11-27	1	1	40.37	0	2011-09-21	2011-12-19	2015-04-30	2.5	7	8	0	0	1	0.5	0	0	4
792	84	7050	1954-11-27	1	1	40.37	0	2011-09-21	2011-12-19	2015-04-30	2.5	7	8	0	0	1	0.5	0	0	4
793	85	7438	1966-07-27	1	1	36.2	1	2012-03-05	2012-05-14	2015-05-20	6.5	9	9	0	0	1	0.7	0	1	4
794	86	7438	1966-07-27	1	1	36.2	1	2012-03-05	2012-05-14	2015-05-20	6.5	9	9	0	0	1	0.7	0	1	4
796	1	3170	1942-11-25	1	3	80.23	0	2002-04-29	2002-11-07	2009-07-14	6.5	6	6	0	0	0	0.1	0	0	4
797	2	3170	1942-11-25	1	3	80.23	0	2002-04-29	2002-11-07	2009-07-14	6.5	6	6	0	0	0	0.1	0	0	4
798	3	3219	1936-05-25	1	3	17.7	0	2002-07-11	2002-10-08	2004-03-29	9.8	6	6	0	0	0	0.1	0	0	2
799	4	3219	1936-05-25	1	x	17.7	0	2002-07-11	2002-10-08	2004-03-29	9.8	6	6	0	0	0	0.1	0	0	2
800	5	3308	1933-04-23	1	x		0		2002-10-18				7	0	0	0		0	0	3
801	6	3308	1933-04-23	1	x		0		2002-10-18				7	0	0	0		0	0	3
802	7	3264	1956-07-18	1	x	145.87	0	2002-06-20	2002-09-10	2014-11-06	3.5	6	7	0	0	0	0.3	0	0	4
803	8	3264	1956-07-18	1	x	145.87	0	2002-06-20	2002-09-10	2014-11-06	3.5	6	7	0	0	0	0.3	0	0	4
804	9	3289	1944-04-02	1	x		0	2002-08-19	2002-09-25		7.3	9	9	0	0	0	0.1	0	0	4
805	10	3289	1944-04-02	1	2		0	2002-08-19	2002-09-25		7.3	9	9	0	0	0	0.1	0	0	4
806	11	3157	1938-05-08	1	x	85.77	0	2002-04-16	2002-09-10	2009-11-03	6.9	7	6	0	0	0	0.1	0	0	4
807	12	3157	1938-05-08	1	0	85.77	0	2002-04-16	2002-09-10	2009-11-03	6.9	7	6	0	0	0	0.1	0	0	4
808	13	3269	1938-09-14	1	3	60.9	0	2002-09-16	2002-10-29	2007-11-26	4.3	7	7	1	0	1	0.9	0	0	5
809	14	3269	1938-09-14	1	3	60.9	0	2002-09-16	2002-10-29	2007-11-26	4.3	7	7	1	0	1	0.9	0	0	5
810	15	3272	1931-05-26	1	0	49.1	0	2002-06-06	2002-09-10	2006-10-13	7.1	7	7	0	0	0	0.3	0	0	4
811	16	3272	1931-05-26	1	0	49.1	0	2002-06-06	2002-09-10	2006-10-13	7.1	7	7	0	0	0	0.3	0	0	4
812	17	3270	1944-05-16	1	x		0	2002-05-01	2002-09-09		7.6	6	6	0	0	1	0.4	0	0	2
813	18	3270	1944-05-16	1	x		0	2002-05-01	2002-09-09		7.6	6	6	0	0	1	0.4	0	0	2
814	19	2664	1932-09-11	1	0	115.87	0	2000-08-02	2000-12-15	2010-08-11	8.3	7	6	0	0	1	1	0	0	4
815	20	2664	1932-09-11	1	0	115.87	0	2000-08-02	2000-12-15	2010-08-11	8.3	7	6	0	0	1	1	0	0	4
816	21	2386	1937-12-08	1	3	19.6	1	1999-11-16	1999-11-16	2001-07-04			8	0	1	1		0	0	6
817	22	2386	1937-12-08	1	3	19.6	1	1999-11-16	1999-11-16	2001-07-04			8	0	1	1		0	0	6
818	23	2695	1931-05-20	1	1	163	0	2000-10-05	2001-03-06	2014-10-06	4	7	7	0	0	0	0.5	0	0	4
819	24	2695	1931-05-20	1	2	163	0	2000-10-05	2001-03-06	2014-10-06	4	7	7	0	0	0	0.5	0	0	4
820	25	2824	1933-06-04	1	x	21.37	0		2001-02-15	2002-11-26	1.8	6	6	0	0	0		0	0	2
821	26	2824	1933-06-04	1	x	21.37	0		2001-02-15	2002-11-26	1.8	6	6	0	0	0		0	0	2
822	27	3335	1934-04-20	1	2		0		2002-10-31	2002-10-31	8	6	6	0	0	0		0	0	4
823	28	3335	1934-04-20	1	2		0		2002-10-31	2002-10-31	8	6	6	0	0	0		0	0	4
824	29	2853	1947-06-14	1	2	61.17	1	2001-03-29	2001-11-29	2007-01-04	4.4	7	7	0	0	1	0.3	1	0	2
825	30	3335	1934-04-20	1	2		0		2002-10-31	2002-10-31	8	6	6	0	0	0		0	0	4
826	31	2081	1934-12-21	1	2	105	0	1998-03-04	1998-09-15	2007-06-15		5	6	0	0	0	0.5	1	0	4
827	32	2081	1934-12-21	1	2	105	0	1998-03-04	1998-09-15	2007-06-15		5	6	0	0	0	0.5	1	0	4
828	33	2451	1937-03-09	1	0	24.37	0	1999-06-04	1999-11-09	2001-11-20	96.8	9		1	1	1	0.7	1	0	6
829	34	2451	1937-03-09	1	0	24.37	0	1999-06-04	1999-11-09	2001-11-20	96.8	9		1	1	1	0.7	1	0	6
830	35	2539	1933-02-19	1	2	63.03	0	2000-02-17	2000-09-21	2005-12-22	9.6	7	9	1	1	1	0.5	0	0	6
831	36	2539	1933-02-19	1	2	63.03	0	2000-02-17	2000-09-21	2005-12-22	9.6	7	9	1	1	1	0.5	0	0	6
832	37	2967	1948-05-04	1	2	25.03	1	2001-08-30	2002-06-04	2004-07-05	14.7	7		1	1	0	0.8	1	2	5
833	38	2967	1948-05-04	1	x	25.03	1	2001-08-30	2002-06-04	2004-07-05	14.7	7		1	1	0	0.8	1	2	5
834	39	2778	1941-05-28	1	x	36.57	0	2001-01-04	2001-08-09	2004-08-26	4	7	7	0	0	0	0.1	0	0	4
835	40	2778	1941-05-28	1	x	36.57	0	2001-01-04	2001-08-09	2004-08-26	4	7	7	0	0	0	0.1	0	0	4
836	41	2796	1941-10-10	1	0		0	2001-01-04	2001-01-18	2001-01-18	4	7		0	0	1	0.1	1	0	4
837	42	2796	1941-10-10	1	0		0	2001-01-04	2001-01-18	2001-01-18	4	7		0	0	1	0.1	1	0	4
838	43	2839	1950-09-14	1	1	99.27	0	2001-03-07	2001-09-14	2009-12-22	13.1	6		0	0	0	0.5	1	0	4
839	44	2839	1950-09-14	1	1	99.27	0	2001-03-07	2001-09-14	2009-12-22	13.1	6		0	0	0	0.5	1	0	4
840	45	2869	1947-07-21	1	1	4.33	0	2001-12-30	2002-02-28	2002-07-10	1.9	6		0	0	0	0.4	1	0	2
841	46	2869	1947-07-21	1	x	4.33	0	2001-12-30	2002-02-28	2002-07-10	1.9	6		0	0	0	0.4	1	0	2
842	47	3002	1945-10-03	1	x	102.37	0	2001-10-03	2002-05-28	2010-12-09	7.6	8		1	0	0	1	1	0	5
843	48	3002	1945-10-03	1	x	102.37	0	2001-10-03	2002-05-28	2010-12-09	7.6	8		1	0	0	1	1	0	5
844	49	2906	1935-10-01	1	2	7.2	1	2001-06-08	2002-05-09	2002-12-15	15.4	6		0	0	1	0.5	1	0	3
845	50	2906	1935-10-01	1	2	7.2	1	2001-06-08	2002-05-09	2002-12-15	15.4	6		0	0	1	0.5	1	0	3
846	51	2901	1945-07-23	1	1	7.1	0	2001-05-28	2002-01-10	2002-08-13	7.3	8	7	1	0	1	0.5	1	0	5
847	52	2901	1945-07-23	1	1	7.1	0	2001-05-28	2002-01-10	2002-08-13	7.3	8	7	1	0	1	0.5	1	0	5
848	53	2656	1942-12-14	1	x	45.2	1	2000-07-13	2001-11-16	2005-08-22	15.1	9		1	1	0	0.9	1	1	5
849	54	2656	1942-12-14	1	1	45.2	1	2000-07-13	2001-11-16	2005-08-22	15.1	9		1	1	0	0.9	1	1	5
850	55	2822	1937-05-10	1	1	93.83	0	2001-02-20	2001-12-04	2009-09-29	18.1	6		0	0	0	0.3	1	0	4
851	56	2822	1937-05-10	1	1	93.83	0	2001-02-20	2001-12-04	2009-09-29	18.1	6		0	0	0	0.3	1	0	4
852	57	2910	1944-06-18	1	2	43.4	1	2001-06-14	2002-02-28	2005-10-12	10.4	8		1	1	0	0.6	1	0	6
853	58	2910	1944-06-18	1	2	43.4	1	2001-06-14	2002-02-28	2005-10-12	10.4	8		1	1	0	0.6	1	0	6
854	59	2854	1945-07-03	1	2	15.27	1	2001-03-30	2002-04-18	2003-07-26	25	6	6	1	0	1	0.3	1	0	5
855	60	2854	1945-07-03	1	2	15.27	1	2001-03-30	2002-04-18	2003-07-26	25	6	6	1	0	1	0.3	1	0	5
856	61	1684	1934-02-04	1	1	80.53	1	1996-09-24	1997-06-19	2004-03-05	6.3	9		0	0	0	0.5	1	0	2
857	62	1684	1934-02-04	1	1	80.53	1	1996-09-24	1997-06-19	2004-03-05	6.3	9		0	0	0	0.5	1	0	2
858	63	3182	1933-10-14	1	1	10.57	1	2001-03-20	2002-05-14	2003-04-01	5.7	8	9	1	1	1	1	1	1	7
859	64	3182	1933-10-14	1	2	10.57	1	2001-03-20	2002-05-14	2003-04-01	5.7	8	9	1	1	1	1	1	1	7
860	65	2999	1940-11-19	1	2	41.27	1	2001-10-25	2002-07-25	2006-01-03	11.8	8	7	0	0	1	0.7	1	2	4
861	66	2999	1940-11-19	1	2	41.27	1	2001-10-25	2002-07-25	2006-01-03	11.8	8	7	0	0	1	0.7	1	2	4
862	67	2747	1943-01-01	1	3	78.27	1	2000-12-05	2001-09-18	2008-03-26	8.2	7	7	1	0	1	0.5	1	2	5
863	68	2747	1943-01-01	1	1	78.27	1	2000-12-05	2001-09-18	2008-03-26	8.2	7	7	1	0	1	0.5	1	2	5
864	69	1466	1941-10-08	1	3	88.23	0		1995-10-05	2003-02-12			5	0	0	0		1	0	2
865	70	1466	1941-10-08	1	2	88.23	0		1995-10-05	2003-02-12			5	0	0	0		1	0	2
866	71	2873	1943-07-11	1	2	124.3	0	2001-04-19	2002-01-15	2012-05-24	9	7		0	0	0	0.2	2	0	4
867	72	2873	1943-07-11	1	x	124.3	0	2001-04-19	2002-01-15	2012-05-24	9	7		0	0	0	0.2	2	0	4
868	73	2993	1939-03-25	1	3	28.93	1	2001-09-26	2002-04-30	2004-09-28	6.2	9	9	1	1	1	0.5	2	2	6
869	74	2993	1939-03-25	1	3	28.93	1	2001-09-26	2002-04-30	2004-09-28	6.2	9	9	1	1	1	0.5	2	2	6
870	75	2993	1939-03-25	1	3	28.93	1	2001-09-26	2002-04-30	2004-09-28	6.2	9	9	1	1	1	0.5	2	2	6
871	76	2993	1939-03-25	1	3	28.93	1	2001-09-26	2002-04-30	2004-09-28	6.2	9	9	1	1	1	0.5	2	2	6
872	77	3109	1936-06-20	1	x	53.83	0	2002-02-14	2002-09-17	2007-03-12	7.1	9		0	0	0	0.4	2	0	2
873	78	3109	1936-06-20	1	x	53.83	0	2002-02-14	2002-09-17	2007-03-12	7.1	9		0	0	0	0.4	2	0	2
874	79	3160	1949-06-20	1	1	11	1	2002-04-18	2002-10-08	2003-09-08	10.4	9	8	1	1	1	1	2	0	6
875	80	3160	1949-06-20	1	1	11	1	2002-04-18	2002-10-08	2003-09-08	10.4	9	8	1	1	1	1	2	0	6
876	81	2882	1940-12-06	1	x	75.6	1	2000-11-07	2001-12-21	2008-04-09	4.8	9		1	0	0	0.5	2	0	5
877	82	2882	1940-12-06	1	x	75.6	1	2000-11-07	2001-12-21	2008-04-09	4.8	9		1	0	0	0.5	2	0	5
878	83	3148	1942-02-02	1	x	144.77	0	2002-04-09	2002-12-19	2015-01-12	4.3	9		0	0	0	0.3	2	0	2
879	84	3148	1942-02-02	1	x	144.77	0	2002-04-09	2002-12-19	2015-01-12	4.3	9		0	0	0	0.3	2	0	2
880	85	3096	1948-01-28	1	1	69.03	1	2002-01-17	2002-10-08	2008-07-09	19.5	7	8	0	0	0	0.5	2	0	2
881	86	3096	1948-01-28	1	1	69.03	1	2002-01-17	2002-10-08	2008-07-09	19.5	7	8	0	0	0	0.5	2	0	2
882	87	3175	1941-10-09	1	0	148.4	0	2002-05-08	2002-12-30	2015-05-12	26.1	7		1	1	1	0.8	2	0	5
883	88	3175	1941-10-09	1	0	148.4	0	2002-05-08	2002-12-30	2015-05-12	26.1	7		1	1	1	0.8	2	0	5
884	89	3110	1943-07-21	1	1	60.93	0	2002-02-15	2002-09-17	2007-10-15	8	7		0	0	0	0.5	2	0	4
885	90	3110	1943-07-21	1	1	60.93	0	2002-02-15	2002-09-17	2007-10-15	8	7		0	0	0	0.5	2	0	4
886	91	5393	1937-09-01	1	1	117.3	0	2003-01-23	2003-09-02	2013-06-11	21	8		0	0	1	0.5	2	0	2
887	92	5393	1937-09-01	1	1	117.3	0	2003-01-23	2003-09-02	2013-06-11	21	8		0	0	1	0.5	2	0	2
888	93	5393	1937-09-01	1	x	117.3	0	2003-01-23	2003-09-02	2013-06-11	21	8		0	0	1	0.5	2	0	2
889	94	5393	1937-09-01	1	x	117.3	0	2003-01-23	2003-09-02	2013-06-11	21	8		0	0	1	0.5	2	0	2
890	95	5393	1937-09-01	1	x	117.3	0	2003-01-23	2003-09-02	2013-06-11	21	8		0	0	1	0.5	2	0	2
891	96	5393	1937-09-01	1	x	117.3	0	2003-01-23	2003-09-02	2013-06-11	21	8		0	0	1	0.5	2	0	2
892	97	5393	1937-09-01	1	x	117.3	0	2003-01-23	2003-09-02	2013-06-11	21	8		0	0	1	0.5	2	0	2
893	98	5393	1937-09-01	1	x	117.3	0	2003-01-23	2003-09-02	2013-06-11	21	8		0	0	1	0.5	2	0	2
894	99	3002	1945-10-03	1	1	102.37	0	2001-10-03	2002-05-28	2010-12-09	7.6	8		1	0	0	1	2	0	5
895	100	3002	1945-10-03	1	1	102.37	0	2001-10-03	2002-05-28	2010-12-09	7.6	8		1	0	0	1	2	0	5
896	101	3002	1945-10-03	1	1	102.37	0	2001-10-03	2002-05-28	2010-12-09	7.6	8		1	0	0	1	2	0	5
897	102	3002	1945-10-03	1	0	102.37	0	2001-10-03	2002-05-28	2010-12-09	7.6	8		1	0	0	1	2	0	5
898	103	3002	1945-10-03	1	x	102.37	0	2001-10-03	2002-05-28	2010-12-09	7.6	8		1	0	0	1	2	0	5
899	104	3002	1945-10-03	1	0	102.37	0	2001-10-03	2002-05-28	2010-12-09	7.6	8		1	0	0	1	2	0	5
900	105	3002	1945-10-03	1	1	102.37	0	2001-10-03	2002-05-28	2010-12-09	7.6	8		1	0	0	1	2	0	5
901	106	3002	1945-10-03	1	x	102.37	0	2001-10-03	2002-05-28	2010-12-09	7.6	8		1	0	0	1	2	0	5
902	107	3002	1945-10-03	1	0	102.37	0	2001-10-03	2002-05-28	2010-12-09	7.6	8		1	0	0	1	2	0	5
903	108	3002	1945-10-03	1	0	102.37	0	2001-10-03	2002-05-28	2010-12-09	7.6	8		1	0	0	1	2	0	5
904	109	3253	1937-06-04	1	2		1	2002-05-06	2002-08-22		8	6	7	1	0	1	0.1	2	0	5
905	110	3253	1937-06-04	1	2		1	2002-05-06	2002-08-22		8	6	7	1	0	1	0.1	2	0	5
906	111	3253	1937-06-04	1	1		1	2002-05-06	2002-08-22		8	6	7	1	0	1	0.1	2	0	5
907	112	3253	1937-06-04	1	1		1	2002-05-06	2002-08-22		8	6	7	1	0	1	0.1	2	0	5
908	113	3034	1940-05-31	1	2	40	1	2001-11-13	2002-06-13	2005-10-13	6.1	9		1	1	0	0.6	2	2	6
909	114	3034	1940-05-31	1	1	40	1	2001-11-13	2002-06-13	2005-10-13	6.1	9		1	1	0	0.6	2	2	6
910	115	3034	1940-05-31	1	0	40	1	2001-11-13	2002-06-13	2005-10-13	6.1	9		1	1	0	0.6	2	2	6
911	116	3034	1940-05-31	1	0	40	1	2001-11-13	2002-06-13	2005-10-13	6.1	9		1	1	0	0.6	2	2	6
912	117	3034	1940-05-31	1	1	40	1	2001-11-13	2002-06-13	2005-10-13	6.1	9		1	1	0	0.6	2	2	6
913	118	3034	1940-05-31	1	x	40	1	2001-11-13	2002-06-13	2005-10-13	6.1	9		1	1	0	0.6	2	2	6
914	119	3034	1940-05-31	1	2	40	1	2001-11-13	2002-06-13	2005-10-13	6.1	9		1	1	0	0.6	2	2	6
915	120	3034	1940-05-31	1	2	40	1	2001-11-13	2002-06-13	2005-10-13	6.1	9		1	1	0	0.6	2	2	6
916	121	3034	1940-05-31	1	2	40	1	2001-11-13	2002-06-13	2005-10-13	6.1	9		1	1	0	0.6	2	2	6
917	122	3034	1940-05-31	1	2	40	1	2001-11-13	2002-06-13	2005-10-13	6.1	9		1	1	0	0.6	2	2	6
918	123	3034	1940-05-31	1	x	40	1	2001-11-13	2002-06-13	2005-10-13	6.1	9		1	1	0	0.6	2	2	6
919	124	3034	1940-05-31	1	x	40	1	2001-11-13	2002-06-13	2005-10-13	6.1	9		1	1	0	0.6	2	2	6
920	125	3253	1937-06-04	1	1		1	2002-05-06	2002-08-22		8	6	7	1	0	1	0.1	2	0	5
921	126	3253	1937-06-04	1	1		1	2002-05-06	2002-08-22		8	6	7	1	0	1	0.1	2	0	5
Abbreviations: DOB, date of birth; PSA,p-specific antigen; RPR, radical prostatectomy; NHT, castration-resistance treatment, TAX, taxotere (docetaxel); LN, lymph node

## Sheet: Table S4A
Table S4A: Specific partners of FKBP7 in RPE-1 cells
ID	Gene symbol	Full Name	score 1 IgG	score 2 IgG	score 3 IgG	score 1 IP1-FKBP7	score 2 IP1-FKBP7	score 3 IP1-FKBP7	score 1 IP2-FKBP7	score 2 IP2-FKBP7	score 3 IP2-FKBP7	Pvalue_IP1	Pvalue_IP2
Q2M2I8	AAK1	AP2 associated kinase 1	44.12			57.73	49.38	92.15	74.67	64.22	58.36	1.75e-08	0.501
Q9BTE6	AARSD1	alanyl-tRNA synthetase domain containing 1		40.12	26.52	43.68	58.16					0.000769	0.778
Q8NE71	ABCF1	ATP-binding cassette, sub-family F (GCN20), member 1	78.15	54.13	51.11	58.11	68.16	67.36	150.6	125.52	103.17	2.97e-09	0.22
Q9UG63	ABCF2	ATP-binding cassette, sub-family F (GCN20), member 2	58.47	38.63	47.21	75.63	98.22	64.35	64.53	81.22	90.2	9.36e-10	0.518
Q8IZP0	ABI1	abl-interactor 1				30.73	23.23			24.86		8.31e-05	0.37
Q9NYB9	ABI2	abl-interactor 2		70.23	45.19	128.34	81.38	75.01	41.69	46.89	36.03	3.01e-08	0.164
P60709	ACTB	actin, beta	939.93	920.93	976.2	668.3	675.21	644.34	846.67	1141.07	983.19	9.9e-20	0.0204
P68032	ACTC1	actin, alpha, cardiac muscle 1	799.9	791.65	829.92	624.09	593.3	565.42	753.45	1041.47	919.17	9.9e-20	0.0118
Q5TGY3	AHDC1	AT hook, DNA binding motif, containing 1				32.14		35.92	53.25			0.00326	0.991
Q09666	AHNAK	AHNAK nucleoprotein	1473.39	1539.76	1375.33	2087.43	2010.33	1996.63	2181.99	2609.77	3175.64	9.9e-20	0.762
Q6P6C2	ALKBH5	alkB homolog 5, RNA demethylase	39.97			49.27		42.63	62.45			0.0138	0.903
Q86V81	ALYREF	Aly/REF export factor	75.89	121.84	86.94	194.6	154.67	183.56	177.43	193.49	155.54	9.16e-09	0.967
Q9NQW6	ANLN	anillin actin binding protein	46.75		23.95	55.72	42.33	53.53	61.3	74.25	51.58	5.54e-11	0.257
O14617	AP3D1	adaptor-related protein complex 3, delta 1 subunit	26.2	57.05	59.29	45.25	38.61	38.49	57.24	70.32	52.04	4.08e-05	0.652
Q9Y2T2	AP3M1	adaptor-related protein complex 3, mu 1 subunit	43.81	25.08	49.88	57.5		54.11	50.15	68.58	59.84	0.00347	0.84
Q92572	AP3S1	adaptor-related protein complex 3, sigma 1 subunit		38.29	35.14	38.18	31.3	75.58	53.98	101.4	142.11	8.81e-06	0.828
Q7Z5H3	ARHGAP22	Rho GTPase activating protein 22	73.05	96.63	94.92	73.13	80.41	101.41	113.95	134.83	35.63	1.28e-10	0.215
Q92974	ARHGEF2	Rho/Rac guanine nucleotide exchange factor (GEF) 2	54.1	148.9	84.17	104.59	67.11	102.22	141.96	216.64	258.52	4.55e-15	0.0649
Q66PJ3	ARL6IP4	ADP-ribosylation factor-like 6 interacting protein 4	48.88	47.58	68.52	69.05	53.68	60.33	76.72	94.53	45.19	1.11e-07	0.834
Q12797	ASPH	aspartate beta-hydroxylase		23.76	23.41	109.35	87.47	175.7	33.45		131.47	4.91e-08	0.0112
Q99700	ATXN2	ataxin 2	220.54	129.13	208.28	124.44	183.65	94.22	243.17	231.94	235.27	9.9e-20	0.145
Q8WWM7	ATXN2L	ataxin 2-like	48.7	65.28	80.14	71.84	63.6	88.1	95	71.79	151.33	2.59e-12	0.142
P11274	BCR	breakpoint cluster region	26.26	32.6	21.6	82.69	70.63	37.22	28.26	24.2	33.53	0.000108	0.4
P20290	BTF3	basic transcription factor 3	49.95	28.14	62.08	30.23	69.85	31.86	74.94	74.44	91.88	0.000157	0.709
P27708	CAD	carbamoyl-phosphate synthetase 2, aspartate transcarbamylase, and dihydroorotase	113.59	81.84	107.4	87.67	48.75	62.36	119.44	172.68	119.12	4.44e-16	0.105
P62158	CALM1	calmodulin 1 (Phosphorylase Kinase, Delta)	259	293.52	255.17	191	187.14	158.86	232.36	296.9	282.14	9.9e-20	0.305
O43852	CALU	calumenin	63.78	73.75	68.83	61.42	72.88	67.1	73.47	47.55	62.41	0.000632	0.862
Q13557	CAMK2D	calcium/calmodulin-dependent protein kinase II delta				50.29		34.76	30.78	28.73	23.84	0.00264	0.981
Q08AD1	CAMSAP2	calmodulin regulated spectrin-associated protein family, member 2	57.05	59.69	63.22	58.85	63.1	75.33	75.11	73.14	60.41	0.000153	0.0904
Q14444	CAPRIN1	cell cycle associated protein 1	153.79	172.22	137.47	118.24	99.43	112.02	125.54	175.5	279.69	7.67e-12	0.255
Q96CT7	CCDC124	coiled-coil domain containing 124	41.95	65.75	63.31	50.98	47.12	47.03	63.21	84.57	86.71	3.69e-06	0.0544
P78371	CCT2	chaperonin containing TCP1, subunit 2 (beta)	121.82	117.16	176.92	86.05	96.22	90.33	210.36	250.44	284.49	2.49e-05	0.527
P40227	CCT6A	chaperonin containing TCP1, subunit 6A (zeta 1)	89.36	106.65	100.68	46.38	40.2	31.9	101.89	163.51	226.04	4.36e-12	0.735
Q12834	CDC20	cell division cycle 20				44.8	37.11	23.22	52.04			0.0194	0.969
Q9UPN4	CEP131	centrosomal protein 131kDa	136.14	93.33	128.35	98.74	68.63	106.85	119.47	206.18	114.22	2.18e-11	0.874
Q5SW79	CEP170	centrosomal protein 170kDa	246.74	193.85	268.93	303	412.3	357.52	394.88	350.18	435.28	9.9e-20	0.012
Q14011	CIRBP	cold inducible RNA binding protein	30.41	56.97	45.63	61.76	29.34	63.34	75.6	102.37	73.25	1.64e-08	0.181
O14578	CIT	citron rho-interacting serine/threonine kinase		41.24		33.14		23.3		40.7		0.000304	0.307
Q14008	CKAP5	cytoskeleton associated protein 5				58.82	62.76	92.59	116.59	121.94	148.02	7.77e-08	0.15
O75122	CLASP2	cytoplasmic linker associated protein 2				86.63	96.41	39.68	114.74	70.67	83.47	1.36e-07	0.414
A5YKK6	CNOT1	CCR4-NOT transcription complex, subunit 1	45.23	25.35	66.72	44.93	58.52	43.68	49.86	53.86	67.71	0.00189	0.447
Q8NBJ5	COLGALT1	collagen beta(1-O)galactosyltransferase 1	72.32	116.96	88.31	110.71	155.04	126.34	114.72	143.29	131.16	8.1e-07	0.696
P53621	COPA	coatomer protein complex, subunit alpha	104.18	133.3	195.51	127.3	135.46	172	172.6	278.5	249.46	9.9e-20	0.892
P35606	COPB2	coatomer protein complex, subunit beta 2 (beta prime)		37	27.02	32.76	32.44		32.2	46.33	44.99	0.000428	0.113
Q9Y678	COPG1	coatomer protein complex, subunit gamma 1	35.69	70.51	72.31	51.64	63.95	53.79	56.69	67.99	47.71	0.000891	0.591
O75534	CSDE1	cold shock domain containing E1, RNA-binding	56.59	52.71	52.44	51.54	51.84	51.96	52.01	51.6	51.79	4.68e-05	0.253
P48729	CSNK1A1	casein kinase 1, alpha 1	41.33			34.28	32.16	23.46	24.37	26.52	23.49	0.00162	0.0151
P21291	CSRP1	cysteine and glycine-rich protein 1	41.53	34.93	38.09	60.42	67.94	82.08	111.18	80.41	76.4	1.56e-05	0.855
P35221	CTNNA1	catenin (cadherin-associated protein), alpha 1, 102kDa				31.04	84.42	35.24	58.36		72.9	0.0724	0.00756
O60716	CTNND1	catenin (cadherin-associated protein), delta 1				39.14	32.85	94.07	22.82	45.58	50.1	5.92e-05	0.769
Q14247	CTTN	cortactin		22.24	56.19	68.38	88.12	79.41	89.1	95.97	66.73	3.38e-12	0.547
Q53TN4	CYBRD1	cytochrome b reductase 1		45.07		55.55	53.46	53.21				0.00354	0.683
Q92499	DDX1	DEAD (Asp-Glu-Ala-Asp) box helicase 1	37.55	77.07	58.47	64.68	36.92	90.16	81.91	88.13	107.08	0.0107	0.691
Q92841	DDX17	DEAD (Asp-Glu-Ala-Asp) box helicase 17	95.12	71.07	117.62	97.13	71.2	61.64	109.35	103.84	76.23	7.48e-07	0.717
Q9UHI6	DDX20	DEAD (Asp-Glu-Ala-Asp) box polypeptide 20	36.36		37.74	43.86	28.82	55.05	39.21		38.45	0.00181	0.533
O00571	DDX3X	DEAD (Asp-Glu-Ala-Asp) box helicase 3, X-linked	131.1	106.69	121.96	104.25	108.96	95.89	158.26	213.32	278.81	9.9e-20	0.296
Q9H0S4	DDX47	DEAD (Asp-Glu-Ala-Asp) box polypeptide 47				43.1	46.09	28.89	40.64	45.99	50.02	0.00716	0.445
P17844	DDX5	DEAD (Asp-Glu-Ala-Asp) box helicase 5	35.02	53.37	35.82	59.28	87.67	68.3	73.87	58.77	34.07	6.52e-08	0.329
Q8TDD1	DDX54	DEAD (Asp-Glu-Ala-Asp) box polypeptide 54				38.65			40.17			0.0141	0.0332
Q9NSV4	DIAPH3	diaphanous-related formin 3	72.61	57.17	43.08	30.69	41.13	65.48	44.65	41.94	66.3	2.09e-06	0.921
Q96N67	DOCK7	dedicator of cytokinesis 7	89.84	80.09	73.47	61.53	116.56	81.62	178.77	137.94	174.08	1.18e-14	0.478
Q14126	DSG2	desmoglein 2		26.31	53.12	43.51			24.93	53.91	39.63	8.37e-06	0.53
P68104	EEF1A1	eukaryotic translation elongation factor 1 alpha 1	245.23	207.97	163.42	253.3	241.72	273.23	333.13	417.39	313.79	9.9e-20	0.696
Q9NZN4	EHD2	EH-domain containing 2	25.89	23.81	71.52	101.33	101.84	109.94	201.43	153.11	159.12	9.9e-20	0.344
Q9H223	EHD4	EH-domain containing 4		58.7	58.89	48.3	48.96	39.8	48.74	68.61	101.79	0.0114	0.216
P19525	EIF2AK2	eukaryotic translation initiation factor 2-alpha kinase 2	33.16	72.31	76	98.7	75.61	65.27	54.97	75.35	105.11	0.0174	0.858
P20042	EIF2S2	eukaryotic translation initiation factor 2, subunit 2 beta, 38kDa				32.74			40.49	40.33	37.44	1.35e-05	0.414
Q9Y262	EIF3L	eukaryotic translation initiation factor 3, subunit L		38.8	39.55	39.17	39.07	27.13	39.46	48.67	46.64	0.0995	0.279
P60842	EIF4A1	eukaryotic translation initiation factor 4A1	165.16	149.81	147.65	113.3	141.84	133.75	148.38	182.23	215.64	6.72e-12	0.574
P23588	EIF4B	eukaryotic translation initiation factor 4B	44.35	65.65		56.12	70.13	55.51	73.71	66.53	47.06	2.35e-05	0.0602
Q04637	EIF4G1	eukaryotic translation initiation factor 4 gamma, 1	129.91	113.34	130.43	131.26	123.08	115.1	155.3	161.83	86.39	1.11e-16	0.524
P78344	EIF4G2	eukaryotic translation initiation factor 4 gamma, 2	70.67	32.43	56.7	77.87	76.27	100.28	59.5	99.54	50.57	1.59e-13	0.571
O60841	EIF5B	eukaryotic translation initiation factor 5B	113.72	129.22	129.89	186.88	141.29	189.72	238.23	253.65	234.22	1.55e-12	0.587
Q8IUD2	ERC1	ELKS/RAB6-interacting/CAST family member 1	27.19	47.26	26.31	68.2	35.92	34.26	97.05	39.18	63.23	3.09e-06	0.0371
P19447	ERCC3	excision repair cross-complementation group 3			46.65	38.51		41.92	46.23		40.82	0.0133	0.997
Q03468	ERCC6	excision repair cross-complementation group 6				31.12	24.23			41.49		0.000276	0.0143
O00471	EXOC5	exocyst complex component 5				53.47	52.2	57.28	63.04	55.93	43.59	0.00211	0.235
Q9Y2D4	EXOC6B	exocyst complex component 6B		61.73		52.8	61.7	57.54	61.81	54.98	59.95	0.00623	0.377
Q9NZB2	FAM120A	family with sequence similarity 120A	29.31	30.13	27.75	31.52	58.57	67.05	35.65	38.5	54.33	0.00226	0.231
Q9BUT9	FAM195A	family with sequence similarity 195, member A			51.23	52.96	34.22	55.35	48.25	56.27	47.91	0.00461	0.125
Q9H4H8	FAM83D	family with sequence similarity 83, member D	31.4	65.04	59.06	55.13	75.94	51.85	130.59	172.25	83.89	9.04e-10	0.29
Q9Y3D0	FAM96B	family with sequence similarity 96, member B	36.88	36.45	32.5	55.35	40.02	28.96	35.92			0.00115	0.715
P62861	FAU	Finkel-Biskis-Reilly murine sarcoma virus (FBR-MuSV) ubiquitously expressed	141.96	155.62	160.85	142.58	163.5	167.72	159.64	179.43	208.01	5.59e-07	0.323
Q5T1M5	FKBP15	FK506 binding protein 15, 133kDa			23.34	59.06	41.5	45.19				6.43e-05	0.414
Q00688	FKBP3	FK506 binding protein 3, 25kDa	57.36	51.84	52.71	61.17	62.9	49.29	71.84	61.51	52.76	1.44e-05	0.213
Q13045	FLII	flightless I actin binding protein	61.5	130.53	100.23	173.89	204.18	122.84	283.4	264.45	243.13	9.9e-20	0.567
Q14315	FLNC	filamin C, gamma	25.27			32.1			38.19	40.54	57.38	3.19e-05	0.115
Q06787	FMR1	fragile X mental retardation 1	161.5	215.4	200.31	159.17	145.69	153.63	198.12	209.89	204.92	2e-15	0.115
Q9P2Q2	FRMD4A	FERM domain containing 4A			27.78	52.91	69.35	78.86	76.63	113.29	132.56	2e-09	0.236
Q13283	G3BP1	GTPase activating protein (SH3 domain) binding protein 1	83.23	85.34	87.15	58.84	73.4	46.04	96.6	124.65	157.69	1.24e-07	0.397
P22102	GART	phosphoribosylglycinamide formyltransferase, phosphoribosylglycinamide synthetase, phosphoribosylaminoimidazole synthetase	51.6	45.62	48.61	47.58		40.83	43.53	47.33	44.7	0.0425	0.784
P48507	GCLM	glutamate-cysteine ligase, modifier subunit				51.72	46.58	40.47	39.9	23.78	51.76	0.0987	0.693
Q9NWZ8	GEMIN8	gem (nuclear organelle) associated protein 8				40.98	41.15	53.67		53.55	33.53	0.00252	0.658
Q6Y7W6	GIGYF2	GRB10 interacting GYF protein 2	177.38	126.87	148.09	161.3	126.73	140.12	243.27	201.09	172.93	1.04e-07	0.245
Q9Y2X7	GIT1	G protein-coupled receptor kinase interacting ArfGAP 1	64.26	21.4	22.4	32	32.13	29.51	31.83	88.16	143.35	7.78e-08	0.859
Q14161	GIT2	G protein-coupled receptor kinase interacting ArfGAP 2				31.95		24.46	32.31	35.05	53.65	6.72e-10	0.0686
P15104	GLUL	glutamate-ammonia ligase	43.33	54.8	28.8	41.89	35.63	24.7	36.81	36.33	40.71	0.0121	0.482
P35269	GTF2F1	general transcription factor IIF, polypeptide 1, 74kDa	69.95	38.09	22.48	41.11	38.82	45.01	30.62	92.42	35.69	8.35e-12	0.574
Q9BZE4	GTPBP4	GTP binding protein 4			25.11	57.58	42.43	25.39		36.38	30.47	0.00137	0.539
Q7Z4H7	HAUS6	HAUS augmin-like complex, subunit 6				34.51		35.66	26.08	43.05	46.78	0.000534	0.709
Q7Z4V5	HDGFRP2	hepatoma-derived growth factor-related protein 2	31.15	34.86		34.46	40.64	28.87	41.74	48.56	42.91	0.000649	0.146
Q9ULT8	HECTD1	HECT domain containing E3 ubiquitin protein ligase 1	56.06		63.9	54.46	45.97	50.97	65.35	84.4	62.65	5.9e-05	0.219
Q9BW71	HIRIP3	HIRA interacting protein 3	28.49	35.68	29.37	63.22	35.05	64.15	63.8	30.24	66.3	9.62e-08	0.237
P16401	HIST1H1B	histone cluster 1, H1b				30.81	41.4	44.51	57.59	68.94	59.75	0.000424	0.00305
P16402	HIST1H1D	histone cluster 1, H1d	56.09	38.81	44.94	58.32	99.5	67.06	141.05	137.58	191.73	2.97e-07	0.0215
O60814	HIST1H2BK	histone cluster 1, H2bk	54.35	73.66	101.43	53	131.11	91.49	75.76	72.17	55.31	3.94e-06	0.833
P23527	HIST1H2BO	histone cluster 1, H2bo	56.81	76	103.08	70.79	167.6	135.12	88.37	129.94	106.3	3.57e-09	0.853
Q14527	HLTF	helicase-like transcription factor	49.57	45.5	44.42	31.76			41.04			0.000497	0.88
Q13151	HNRNPA0	heterogeneous nuclear ribonucleoprotein A0	94.98	59.3	62.71	46.51	60.1	74.07	57	57.82	88.49	0.0045	0.0327
P09651	HNRNPA1	heterogeneous nuclear ribonucleoprotein A1	123.37	119.22	137.34	178.75	223.64	272.76	207.32	263.18	274.03	1.73e-12	0.00119
P22626	HNRNPA2B1	heterogeneous nuclear ribonucleoprotein A2/B1	59.02			72.79	81.18	84.66	57.22	130.4	100.54	0.000138	0.333
P51991	HNRNPA3	heterogeneous nuclear ribonucleoprotein A3	57.16	34.39	59.19	67.75	69.56	45.38	85.86	54.87	109.73	5.7e-10	0.000933
P52272	HNRNPM	heterogeneous nuclear ribonucleoprotein M	671.8	819.65	811.89	853.02	915.83	793.88	1191.16	1188.52	1026.95	9.9e-20	0.0987
Q00839	HNRNPU	heterogeneous nuclear ribonucleoprotein U (scaffold attachment factor A)	320.15	316.92	334.52	347.67	297.59	309.92	312.8	298.44	347.95	9.9e-20	0.469
P11021	HSPA5	heat shock 70kDa protein 5 (glucose-regulated protein, 78kDa)	48.23	50.43	40.96	30.65	27.3	30.89	26.32	38.07	37.7	0.00434	0.725
P04792	HSPB1	heat shock 27kDa protein 1	372.26	393.27	376.31	340.79	217.03	269.85	390.48	323.6	359.23	5.33e-15	0.231
P10809	HSPD1	heat shock 60kDa protein 1 (chaperonin)				43.09	50.75	27.74	72.49	70.73	117.46	0.00242	0.583
Q13418	ILK	integrin-linked kinase	53.53	69.66	54.48	50.14	56.07	57.2	60.68	64.18	143.97	1.06e-05	0.892
Q9P206	KIAA1522	KIAA1522	52.92	57.66	44.13	74.8	123.13	132.49	138.74	87.6	81.33	1.57e-05	0.836
P52732	KIF11	kinesin family member 11	38.81	58.13	42.83	56.32	53.08	61.48	67.15	40.78	168.85	4.88e-06	0.21
Q02241	KIF23	kinesin family member 23	73.83	36.23		44.33	46.57	62.15	55.46	78.67	38.22	1.89e-06	0.804
O95239	KIF4A	kinesin family member 4A	40.17	94.35	114.35	87.23	139.46	80.42	166.67	122.92	222.73	3.9e-12	0.518
P05783	KRT18	keratin 18, type I	40.7	36.38	35.09	43.5	48.24	101.16	81.57	85.76	47.36	4.12e-08	0.262
P05787	KRT8	keratin 8, type II	214.31	152.43	180.72	188.15	226.9	149.56	182.57	194.48	155.68	8.92e-09	0.839
P35527	KRT9	keratin 9, type I				55.63	43.63	39.1	28.86	22.25		0.00175	0.012
Q6PKG0	LARP1	La ribonucleoprotein domain family, member 1	130.02	127.18	122.45	173.15	119.63	164.62	221.12	210.72	234.12	9.9e-20	0.0464
Q14847	LASP1	LIM and SH3 protein 1	193.06	198.8	275.22	219.87	250.23	247.05	254.22	334.86	315.9	9.9e-20	0.245
Q9UPQ0	LIMCH1	LIM and calponin homology domains 1	104.37	54.42	28.61	81.28	91.09	55.87	50.83	180.5	90.24	1.21e-12	0.35
Q9UGP4	LIMD1	LIM domains containing 1				80.9	81.37	67.36	57.51	68.91	82.46	0.0007	0.601
P02545	LMNA	lamin A/C	205.35	269.07	235.05	204.87	246.1	220.01	289.84	290.31	224.3	1.39e-13	0.0371
Q8WWI1	LMO7	LIM domain 7	56.82	104.27	96.8	68.64	43.85	67.6	98.41	119.5	87.13	1.09e-13	0.233
Q14693	LPIN1	lipin 1	33.88	43.3	45.42	40.32	54.34	71.36	29.54	49.52	59.46	5.84e-05	0.255
Q93052	LPP	LIM domain containing preferred translocation partner in lipoma	39.51	26.17	29.43	44.1	34.19	46.5	96.05	74.96	76.76	0.000614	0.925
Q9Y2L9	LRCH1	leucine-rich repeats and calponin homology (CH) domain containing 1	39.93		45.34	32.31	37.53	45.95	33.11	33.63	27.37	0.0334	0.119
Q96AG4	LRRC59	leucine rich repeat containing 59	29.83	40.03	34.53	44.59	48.4	64.68	79.32	47.12	121.15	1.1e-06	0.0176
Q86V48	LUZP1	leucine zipper protein 1	126.16	127.99	162.21	150.62	202.3	178.42	238.01	276.97	228.72	9.9e-20	0.078
P46821	MAP1B	microtubule-associated protein 1B	42.77	41.56	47.51	33.53	80.55	38.2	77.77	28.76	37.57	0.00777	0.848
O43318	MAP3K7	mitogen-activated protein kinase kinase kinase 7				91.1	82.69	80.1	87.65	92.55	95.22	5.24e-07	0.379
P27816	MAP4	microtubule-associated protein 4	108.03	158.8	109.04	143.81	126.38	102.51	162.91	160.9	142.32	1.85e-11	0.00293
Q3KQU3	MAP7D1	MAP7 domain containing 1	77.27	66.01	71.22	108.22	128.24	127.78	83	71.84	126.89	0.00046	0.778
Q8IWC1	MAP7D3	MAP7 domain containing 3	25.64	38.59		78.59	76.84	70.52		47.4		0.00037	0.44
P33991	MCM4	minichromosome maintenance complex component 4	92.48	98.44	111.51	115.42	33.07	75.63	91.28	145.93	51.83	0.00058	0.649
P33993	MCM7	minichromosome maintenance complex component 7	69.95	58.02	44.62	61.06	54.04	46.83	82.17	65.55	74.65	0.0119	0.85
P46013	MKI67	marker of proliferation Ki-67	58.08	134.86	82.31	180.53	191.36	176.84	240.88	166.48	229.23	9.9e-20	0.542
Q6WCQ1	MPRIP	myosin phosphatase Rho interacting protein	230.71	169.9	169.86	95.64	74.96	145.17	207.68	227.48	154.04	9.9e-20	0.883
P49959	MRE11A	MRE11 homolog A, double strand break repair nuclease	66.73	91.66	101.02	73.53	72.41	51.03	144.47	123.18	103.16	8.88e-16	0.732
Q6P1L8	MRPL14	mitochondrial ribosomal protein L14				47.08			36.78		27.97	0.000447	0.486
P52701	MSH6	mutS homolog 6	71.83	46.58	43.73	63.64	72.62	64.46	114.78	184.97	154.02	2.11e-15	0.345
Q9Y4B5	MTCL1	microtubule crosslinking factor 1	83.63	111.69	119.98	88.18	63.13	74.34	132.56	96.26	160.16	5.63e-10	0.388
Q86UE4	MTDH	metadherin	62.71	90.38	103.92	120.48	81.96	128.28	143.55	180.3	162.66	6.55e-15	0.393
Q14764	MVP	major vault protein	174.86	213.37	231.06	273.31	233.95	192.84	397.46	344.7	421.56	9.9e-20	0.87
Q9P2K5	MYEF2	myelin expression factor 2		32.01	61.13	72.95	93.37	99.99	82.96	83.23	23.2	6.15e-06	0.453
P35580	MYH10	myosin, heavy chain 10, non-muscle	48.68	49.34	73.29	31.04	25.06	23.53	35.34	50.12	106.55	8.32e-13	0.688
P35579	MYH9	myosin, heavy chain 9, non-muscle	151.81	163.45	195.87	187.59	167.43	137.51	157.38	164.66	181.53	9.9e-20	0.016
P19105	MYL12A	myosin, light chain 12A, regulatory, non-sarcomeric	40.54	38.08	40.73	42.28						0.714	0.727
Q92614	MYO18A	myosin XVIIIA	231.78	230.85	225.31	161.96	103.74	187.08	373.13	382.14	358.24	9.9e-20	0.984
O00159	MYO1C	myosin IC	70.69	77.29	97.89	51.37	92.46	44.37	93.88	53.64	110.56	1.4e-06	0.646
Q12965	MYO1E	myosin IE	77.69	75.93	47.29	53.57	63.22	78.17	100.85	159.22	133.38	2.94e-09	0.166
Q6NZ67	MZT2B	mitotic spindle organizing protein 2B				41.89	48.26	39.98		48.77	36.69	1.75e-05	0.442
P55209	NAP1L1	nucleosome assembly protein 1-like 1	57.16	58.6	64.99	67.62	61.22	69.44	67.89	52.34	57.43	9.85e-07	0.808
Q8NEY1	NAV1	neuron navigator 1	146.05	167.31	137.31	182.62	190.67	194.62	174.95	201	329.39	9.9e-20	0.229
O60934	NBN	nibrin		46.92		56.55	69.05	56.61	85.37	70.66	114.93	0.0015	0.103
Q15021	NCAPD2	non-SMC condensin I complex, subunit D2	60.3	71.76	67.94	88.34	71.08	52.5	83.61	157.84	109.61	1.76e-08	0.952
Q9BPX3	NCAPG	non-SMC condensin I complex, subunit G	54.63	30.96	65.02	66.87	50.31	59.48	54.06	90.94	107.93	9.11e-07	0.771
Q15003	NCAPH	non-SMC condensin I complex, subunit H	104.33	138.8	123.56	185.21	186.2	129.66	197.57	212.82	196.98	9.9e-20	0.718
Q9Y618	NCOR2	nuclear receptor corepressor 2		60.23	85.67	110.32	62.12	113.36	117.31	134.09	128.74	1.27e-08	0.469
Q9NXR1	NDE1	nudE neurodevelopment protein 1				41.82		37.66	48.82	48.99	78.93	0.0188	0.499
Q8NHV4	NEDD1	neural precursor cell expressed, developmentally down-regulated 1				42.66	45.06	75.67	84.11	120.86	94.14	0.000956	0.157
Q96PU5	NEDD4L	neural precursor cell expressed, developmentally down-regulated 4-like, E3 ubiquitin protein ligase		46.59	36.39	58.89	60.29	34.43		22.55	43.88	1.94e-07	0.763
O00712	NFIB	nuclear factor I/B	30.88			31.14	24.56		35.79	33.29		0.00129	0.874
P08651	NFIC	nuclear factor I/C (CCAAT-binding transcription factor)	31.87			32.48	34.77	35.39		35.95		0.00543	0.128
Q9BPW8	NIPSNAP1	nipsnap homolog 1 (C. elegans)	27.2	36.64	32.29	38.22	30.34	40.96	49.16	56.46	35.02	4.7e-05	0.584
P30419	NMT1	N-myristoyltransferase 1	47.45	63.15	46.86	34.45	43.49	29.55	59.55	47.75	24.61	0.0167	0.784
Q9ULX3	NOB1	NIN1/RPN12 binding protein 1 homolog	23.4	56.34	38.26	61.67	85.32	61.99	67.3	71.64	66.58	6.59e-09	0.943
Q15233	NONO	non-POU domain containing, octamer-binding	126.22	158.52	119.35	47.58	43.49	105.6	198.25	114.5	110	4.44e-16	0.817
P06748	NPM1	nucleophosmin (nucleolar phosphoprotein B23, numatrin)	575.04	633.68	609.35	799.29	903.01	923.03	870.9	944.05	1016.76	9.9e-20	0.658
O14786	NRP1	neuropilin 1	87.4	89.32	76.87	84.37	105	94.15	91.24	102.04	158	1.17e-11	0.788
Q7Z417	NUFIP2	nuclear fragile X mental retardation protein interacting protein 2	110.73	107.13	135.57	188.41	153.05	88.04	107.11	274.68	158.95	1.11e-16	0.721
Q14980	NUMA1	nuclear mitotic apparatus protein 1	225.3	146.43	209.68	216.62	226.94	206.15	226.55	287.65	228.52	9.9e-20	0.726
Q9UQ80	PA2G4	proliferation-associated 2G4, 38kDa	59.59	78.28	91.66	80.12	52.34	60.3	53.43	32.19	38.58	2.03e-08	0.234
P11940	PABPC1	poly(A) binding protein, cytoplasmic 1	38.05	48.04	46.92	44.02	49.77	38.57	51.17	100.11	42.66	3.55e-09	0.364
O96013	PAK4	p21 protein (Cdc42/Rac)-activated kinase 4	75.36	77.37	55.3	92.49	73.56	69.25	141.98	166.16	156.49	4.68e-05	0.568
Q8WX93	PALLD	palladin, cytoskeletal associated protein	66.88	45.07	44.81	68.7	55.85	99.38	114.56	66.89	63.26	3.38e-13	0.497
O43252	PAPSS1	3'-phosphoadenosine 5'-phosphosulfate synthase 1	91.17	107.85	73.33	111.06	83.78	84.35	85.73	184.63	212.39	3.33e-15	0.65
O95340	PAPSS2	3'-phosphoadenosine 5'-phosphosulfate synthase 2	282.66	328.55	377.56	396.33	433.55	387.61	516	655.94	408.89	9.9e-20	0.599
P09874	PARP1	poly (ADP-ribose) polymerase 1	24.24	41.39	46.17	48.23	38.3			47.75	48.17	0.268	0.472
Q96IZ0	PAWR	PRKC, apoptosis, WT1, regulator	51.61	92.44	92.56	45.22	45		36.33	42.75	30.47	3.68e-10	0.431
Q15154	PCM1	pericentriolar material 1	80.27	73.12	104.07	98.96	49.94	127.49	128.79	110.08	90.92	9.9e-20	0.00203
O00151	PDLIM1	PDZ and LIM domain 1	165.45	109.81	101.14	88.16	85.87	103.86	109.08	168.81	168.92	7.07e-07	0.247
Q96HC4	PDLIM5	PDZ and LIM domain 5	39.7	35.85	56.66	44.73	57.47	111.6	46.35	66.66	78.13	1.94e-12	0.386
Q9NR12	PDLIM7	PDZ and LIM domain 7 (enigma)	39.66		26.61	50.76	53.32	42.07	72.79	80.59	98.59	1.9e-06	0.0845
Q9UHV9	PFDN2	prefoldin subunit 2	38.95	36.61	45.6	30.62			25.27	38.14	20.94	0.000357	0.407
Q01813	PFKP	phosphofructokinase, platelet	90.28	99.03	104.28	97.79	76.45	97.93	179.86	187.01	138.55	5.27e-08	0.313
Q86UU1	PHLDB1	pleckstrin homology-like domain, family B, member 1	151.37	81.39	85.45	193.63	197.89	158.99	265.25	220.05	339.79	9.9e-20	0.869
Q86SQ0	PHLDB2	pleckstrin homology-like domain, family B, member 2				31.92	34.07	64.76	23.85	54.65	51.77	1.55e-07	0.661
Q9NWS0	PIH1D1	PIH1 domain containing 1	54.06	40.61	32.89	42.32	44.66	33.65	43.26	31.3	36.9	0.000711	0.458
Q15149	PLEC	plectin	64.82	57.17	31.49	75.64	59.13	45.5	65.73	69.9	112.86	0.00257	0.67
Q8TCS8	PNPT1	polyribonucleotide nucleotidyltransferase 1				38.46	51.24	40.85	46.59	47.63	31.68	0.000159	0.352
P24928	POLR2A	polymerase (RNA) II (DNA directed) polypeptide A, 220kDa		22.86	65.13	42.16	43.76	47.64	99.22	72.33	85.71	1.54e-06	0.134
Q99575	POP1	POP1 homolog, ribonuclease P/MRP subunit		55.14	39.83	53.49	36.56	33.42	59.66	34.19		9.65e-05	0.56
Q86W92	PPFIBP1	PTPRF interacting protein, binding protein 1 (liprin beta 1)				34.24			32.72	30.31		0.00312	0.934
O14974	PPP1R12A	protein phosphatase 1, regulatory subunit 12A	363.83	291.13	303.58	328.07	342.92	287.61	398.73	462.03	497.45	3.33e-16	0.683
Q9BZL4	PPP1R12C	protein phosphatase 1, regulatory subunit 12C	28.6	80.35	88.42	103.09	125.16	106.37	103.19	201.13	110.99	6.85e-09	0.3
O60828	PQBP1	polyglutamine binding protein 1	34.13	52.1	51.98	51.51	38.65	51.72	30.77	43.49	46.75	6.34e-06	0.373
P78527	PRKDC	protein kinase, DNA-activated, catalytic polypeptide		25.1		57.59	91.7	89.77	85.86	106.01	60.2	0.00457	0.905
P48634	PRRC2A	proline-rich coiled-coil 2A	53.5	22.39	38.7	44.15	73.85	93.06	132.96	110.25	96.38	1.45e-13	0.464
Q5JSZ5	PRRC2B	proline-rich coiled-coil 2B	43.58			44.91	75.07	59.56	63.93	74.06	42.97	1.75e-05	0.392
Q9Y520	PRRC2C	proline-rich coiled-coil 2C	110.99	101.57	114.73	91.45	79.93	124.36	148.73	151.57	129.99	9.9e-20	0.00862
Q9H3S7	PTPN23	protein tyrosine phosphatase, non-receptor type 23				34.1	26.11					0.0045	0.572
Q6NZI2	PTRF	polymerase I and transcript release factor	86.77	44.14	37.88	93.04	59.64	51.66	99.62	149.02	168.65	9.9e-20	0.094
Q96QR8	PURB	purine-rich element binding protein B				46.3		47.54		55.84	24.39	0.00291	0.00303
Q9BRP8	PYM1	PYM homolog 1, exon junction complex associated factor	57	38.49	34.96	43.14	58.79	32.79	75.45	47.99	93.9	1.18e-07	0.616
Q9BXF6	RAB11FIP5	RAB11 family interacting protein 5 (class I)	41.05	40.14	36.76	51.41	51.43	26.32	39.46		78.39	5.22e-06	0.154
Q9H0H5	RACGAP1	Rac GTPase activating protein 1	92.4	71.52	53.47	113.44	77.33	58.13	113.04	100.78	145.42	2.79e-07	0.132
Q9P0K7	RAI14	retinoic acid induced 14				46.56	46.86	47.05	54.16	49.41	71.49	0.0017	0.742
Q9UJF2	RASAL2	RAS protein activator like 2	89.52	92.6	178.62	156.88	188.46	254.71	306.76	302.82	239.65	1.67e-14	0.163
Q96PK6	RBM14	RNA binding motif protein 14	149.12	131.72	119.19	84.1	103.81	122.77	206.44	124.11	175.84	8.19e-10	0.44
Q9P2N5	RBM27	RNA binding motif protein 27	34.08	55.1	31.57	69.69	75.9	60.77	66.79	63.43	75.59	0.0101	0.263
Q96EV2	RBM33	RNA binding motif protein 33				31.48	30.84	25.87	24.43	35	35.79	6.12e-06	0.642
Q9Y580	RBM7	RNA binding motif protein 7				138.88	97.5	38.63	106.28	37.1	125.42	0.000117	0.545
P35250	RFC2	replication factor C (activator 1) 2, 40kDa	46.76	41.22	44.31	44.2	37.77	36.79	44.34	57.43	91.81	0.000191	0.565
Q6R327	RICTOR	RPTOR independent companion of MTOR, complex 2				31.48		33.13	33.15		69.79	0.00037	0.684
Q9Y508	RNF114	ring finger protein 114	51.54	76.13	55.79	78.97	57.85		59.74	37.74		0.00496	0.902
P27635	RPL10	ribosomal protein L10	551.43	435.93	515.98	523.51	423.13	539.86	557.91	606.89	610.09	9.9e-20	0.41
P62906	RPL10A	ribosomal protein L10a	171.65	241.77	256.68	194.55	188.44	178.37	274.1	245.13	323.69	3.01e-08	0.45
P62913	RPL11	ribosomal protein L11	339.83	257.82	267.89	271.51	287.86	296.22	368.28	505.62	484.08	9.9e-20	0.26
P30050	RPL12	ribosomal protein L12	210.3	204.47	205.22	179.96	123.61	227.63	231.24	249.9	283.04	4.46e-14	0.469
P26373	RPL13	ribosomal protein L13	563.08	513.58	498.04	595.57	484.13	585.16	724.76	869.79	826.5	9.9e-20	0.00354
P40429	RPL13A	ribosomal protein L13a	139.91	146.92	120.67	163.07	112.75	170.17	260.37	280.17	244.59	1.21e-13	0.126
P50914	RPL14	ribosomal protein L14	129.99	122.04	122.1	118.24	104.77	42.25	160.25	251.17	131.77	1.07e-11	0.289
P18621	RPL17	ribosomal protein L17	274.75	209.86	212.28	268.79	258.87	238.95	316.74	419.22	323.18	9.9e-20	0.00365
Q07020	RPL18	ribosomal protein L18	183.18	243.07	239.39	207.11	226.72	279.68	319.45	362.62	387.55	3.79e-13	0.439
Q02543	RPL18A	ribosomal protein L18a	138.92	153.96	171.61	190.72	208.46	213.83	158.61	283.79	241.81	2e-15	0.00215
P84098	RPL19	ribosomal protein L19	323.74	411.36	382.15	301.87	333.08	363.96	382.31	553.91	315.07	9.9e-20	0.073
P46778	RPL21	ribosomal protein L21	292.38	216.48	212.88	283.82	273.08	255.23	349.52	532.42	434	9.9e-20	0.182
P62829	RPL23	ribosomal protein L23	94.75	74	132.39	76.03	30.78	58.74	135.98	144.31	148.59	1.43e-12	0.95
P62750	RPL23A	ribosomal protein L23a	80.18	106.84	125.98	124.3	94.36	76.58	68.11	178.4	132.28	1.11e-13	0.0365
P83731	RPL24	ribosomal protein L24	378.84	255.42	352.53	209.62	197.8	247.25	318.5	465.05	438.6	9.9e-20	0.11
P61254	RPL26	ribosomal protein L26	207.74	157.83	171.86	151.31	132.32	167.95	305.48	352.63	347.43	9.9e-20	0.0129
Q9UNX3	RPL26L1	ribosomal protein L26-like 1	190.77	147.25	139.15	131.61	126.99	166.41	276.78	338.26	325.22	9.9e-20	0.0223
P46776	RPL27A	ribosomal protein L27a	159.5	181.28	208.6	89.11	122.36	166.47	267.82	216.74	259.92	9.9e-20	0.106
P46779	RPL28	ribosomal protein L28	367.12	388.48	428.22	414.54	524.88	443.11	650.07	842.95	793.02	9.9e-20	0.000589
P47914	RPL29	ribosomal protein L29	103.45	117.3	153.73	137.43	130.13	127.17	202.41	344.87	214.67	9.9e-20	0.107
P39023	RPL3	ribosomal protein L3	237.44	254.02	287.78	234.68	215.76	245.53	408.63	429.91	515.77	9.9e-20	0.177
P62888	RPL30	ribosomal protein L30	24.34	45.85	41.27	38.92	24.97	43.87	39.62	38.56	40.92	0.0413	0.101
P62899	RPL31	ribosomal protein L31	89.7	157.39	182.73	192.99	136.03	174.31	179.86	197.42	129.72	9.9e-20	0.638
P62910	RPL32	ribosomal protein L32	50.2	61.25	64.68	112.19	70.36	93.44	97.26	116.2	118.47	6.82e-11	0.045
P49207	RPL34	ribosomal protein L34	81.52	168.48	135.07	185.53	191.21	168.61	174.47	266.79	225.44	2.94e-12	0.00686
P42766	RPL35	ribosomal protein L35	68.36	94.07	42.81	96.97	145.78	117.58	172.5	300.37	154.33	2.55e-11	0.0128
P18077	RPL35A	ribosomal protein L35a	26.55	26.78	26.71	33.56	26.36	26.35	45.96	45.45	51.75	3.09e-06	0.302
Q9Y3U8	RPL36	ribosomal protein L36	148.23	148.77	164.45	123.4	133.43	141.09	124.11	146.21	174.28	2.18e-14	0.0409
P61927	RPL37	ribosomal protein L37				32.88	54.59	38.24	115.4	167.06	108.04	9.42e-07	0.00575
P61513	RPL37A	ribosomal protein L37a	183.13	158.21	219.35	194.12	185.11	269.08	328.37	416.62	325.27	6.99e-08	0.182
P63173	RPL38	ribosomal protein L38	66.61	150.41	126.4	140.65	115.28	94.9	132.5	229.87	226.98	1.55e-12	0.496
P36578	RPL4	ribosomal protein L4	408.74	469.41	480.41	408.97	483.46	464.23	674.13	1007.12	821.51	9.9e-20	0.0416
P46777	RPL5	ribosomal protein L5	59.37	38.36	42.29	62.31	67.16	66.15	101.73	94.42	86.78	3.13e-11	0.00163
Q02878	RPL6	ribosomal protein L6	265.58	270.24	311.84	246.12	290.18	238.85	396.64	481.1	445.63	9.9e-20	0.118
P18124	RPL7	ribosomal protein L7	96.86	140.5	142.8	101.36	114.54	91.84	176.15	193.69	183.4	8.09e-05	0.518
P62424	RPL7A	ribosomal protein L7a	169.76	187.24	229.58	203.61	227.43	225.48	289.86	343.17	284.86	9.9e-20	0.0379
P62917	RPL8	ribosomal protein L8	266.52	280.68	215.45	227.62	192.31	266.75	327.79	466.86	305.22	9.9e-20	0.00341
P32969	RPL9	ribosomal protein L9	375.31	392.81	403.19	420.54	434.75	428.99	559.49	729.96	989.19	9.9e-20	0.986
P05388	RPLP0	ribosomal protein, large, P0	164.67	108.05	146.98	160.77	123.1	101.27	154.78	169.32	184.58	1.15e-08	0.79
P05386	RPLP1	ribosomal protein, large, P1	90.72	83.26	79.52	107.17	104.31	78.36	91.02	120.95	136.44	4.3e-10	0.944
P46783	RPS10	ribosomal protein S10	204.29	173.51	185.69	253.59	264.07	226.43	285.19	470.15	293.75	2.06e-12	0.236
P62280	RPS11	ribosomal protein S11	186.79	156.86	161.44	138.47	123.15	174.89	244.92	324.88	265.44	2.53e-14	0.0865
P62277	RPS13	ribosomal protein S13	91.81	116.1	122.61	132.27	115.44	110.45	200.53	255.86	196.1	9.9e-20	0.198
P62263	RPS14	ribosomal protein S14	231.99	313.45	302.65	270.18	284.87	316.16	352.59	468.58	357.96	9.9e-20	0.868
P62841	RPS15	ribosomal protein S15	280.41	323.21	228.34	125.61	97.19	111.13	268.87	317.3	487.89	9.9e-20	0.973
P62244	RPS15A	ribosomal protein S15a	77.83	52.27	75.21	67.22	85.43	75.19	114.17	97.87	225.21	1.1e-10	0.47
P62249	RPS16	ribosomal protein S16	170.63	160.91	161.84	138.83	146.66	156.46	134.62	168.86	338.7	1.11e-16	0.424
P0CW22	RPS17	ribosomal protein S17	102.72	166.88	116.62	182.53	175.08	128.78	202.19	238.56	350.88	9.9e-20	0.997
P62269	RPS18	ribosomal protein S18	103.47	142.28	98.65	90.81	63.4	67.37	149.13	157.55	158.21	2.61e-09	0.0438
P39019	RPS19	ribosomal protein S19	675.87	676.4	641.25	572.7	619.55	607.8	629.65	794.89	688.41	9.9e-20	0.259
P15880	RPS2	ribosomal protein S2	56.33	60.83	90.39	53.23	50.63	64.79	89.23	149.12	140.35	2.22e-09	0.849
P60866	RPS20	ribosomal protein S20	37.07	30.99	33.07	32.62	67.46	49.62	54.03	58.05	89.04	0.00045	0.699
P63220	RPS21	ribosomal protein S21	239.35	269.42	271.88	192.59	231.69	165.71	148.26	220.06	212.48	6.08e-07	0.643
P62266	RPS23	ribosomal protein S23	124.97	170.8	139.32	105.39	41.6	124.71	134.27	145.21	209.87	4.66e-09	0.275
P62851	RPS25	ribosomal protein S25	98.49	177.68	143.58	144.93	97.49	186.65	189.76	217.29	187.81	2.52e-05	0.159
P62857	RPS28	ribosomal protein S28	128.85	107.64	78.01	114.39	117.47	57.43	75.38	92.97	119.78	1.24e-06	0.695
P23396	RPS3	ribosomal protein S3	169.05	297.02	245.28	147.97	117.95	142.32	248.51	215.74	189.38	1.11e-16	0.933
P61247	RPS3A	ribosomal protein S3A	415.05	380.75	403.58	497.91	542.04	492.67	569.71	697.76	596.06	9.9e-20	0.45
P46782	RPS5	ribosomal protein S5	54.46	72.77	63.51	47.74	56.09	43.31	56.78	123.38	84.64	4.93e-12	0.643
P62753	RPS6	ribosomal protein S6	512.06	645.97	591.89	566.27	581.34	652.61	690.82	860.85	712.01	9.9e-20	0.00688
P62081	RPS7	ribosomal protein S7	337.86	387.28	405.91	483.26	520.08	394.04	495.95	481.16	808.27	9.9e-20	0.682
P62241	RPS8	ribosomal protein S8	531.68	650.91	665.04	546.14	590.01	604.13	690.93	798.87	769.04	9.9e-20	0.905
P46781	RPS9	ribosomal protein S9	52.73	133.94	167.62	165.62	197.21	163.58	237.43	264.07	225.54	1.66e-09	0.0432
P08865	RPSA	ribosomal protein SA	85.05	151.3	165.82	76.6	26.41	59.67	82.45	81.46	47.83	1.54e-06	0.458
Q9P2E9	RRBP1	ribosome binding protein 1	88.1	78.6	50.45	46.23	51.36	62.49	116.58	83.86	120.15	7.02e-06	0.42
Q9Y3I0	RTCB	RNA 2',3'-cyclic phosphate and 5'-OH ligase	47.82	77.35	107.97	45.22	46.96	70.61	172.16	144.48	222.5	8.43e-11	0.474
Q9Y265	RUVBL1	RuvB-like AAA ATPase 1	38.07	45.57	34.66	47.03	48.14	53.85	52.29	66.36	52.63	3.65e-08	0.305
Q9BY12	SCAPER	S-phase cyclin A-associated protein in the ER			60.68	63.66	59.5	46.81			21.96	0.0148	0.533
Q9NVU7	SDAD1	SDA1 domain containing 1				31.08	26.6	26.16	35.81	31.21		0.000219	0.379
Q15019	2002-09-01	septin 2	250.97	350.46	385.84	433.34	439.21	419.33	467.46	581.9	533.48	9.9e-20	0.965
Q16181	2007-09-01	septin 7	64.27	50.02	54.91	49.91	25.92	26.71	81.1	72.64	82.71	8.42e-05	0.244
Q9UHD8	2009-09-01	septin 9	576.67	663.49	693.84	814.43	676.13	782.65	887.42	1276.07	1108.77	9.9e-20	0.0593
Q8NC51	SERBP1	SERPINE1 mRNA binding protein 1	227.43	240.74	229.72	196.81	208.17	236.92	293.6	387.85	223.62	9.9e-20	0.221
P50454	SERPINH1	serpin peptidase inhibitor, clade H (heat shock protein 47), member 1, (collagen binding protein 1)	178.15	161.5	197.36	195.84	192.48	166.63	310.07	425.77	491.98	9.9e-20	0.942
P23246	SFPQ	splicing factor proline/glutamine-rich	70.85	54.1	41.39	32.86	62.58	23.73	55.02	41.83	57.31	8.19e-09	0.207
P34897	SHMT2	serine hydroxymethyltransferase 2 (mitochondrial)	33.35	46.65	43.48	57.24	35.23	29.51	52.62	70.67	31.45	0.00052	0.487
Q8TF72	SHROOM3	shroom family member 3		29.58	29.52	31.2	28.36	28.75	37.21		24.22	0.000202	0.911
Q9P270	SLAIN2	SLAIN motif family, member 2	110.59	91.06	98.02	90.76	121.7	92.63	113.39	202.59	159.62	9.9e-20	0.0181
Q9UQE7	SMC3	structural maintenance of chromosomes 3	100.64	98.37	115.05	90.75	90.15	78.33	82.16	156.89	140.45	1.52e-12	0.638
Q16637	SMN1	survival Of Motor Neuron 1, Telomeric	77.25	66.33	63.21	64.94	65.97	64.59	73.44	75.75	41.98	5.16e-05	0.867
Q7KZF4	SND1	staphylococcal nuclease and tudor domain containing 1	239.8	241.98	233.01	217.34	257.48	198.64	291.2	327.32	277.99	3.2e-08	0.997
Q13573	SNW1	SNW domain containing 1	139.69	80.17	141.22	137.99	101.66	138.48	175.89	175.73	176.68	3.21e-12	0.396
O94964	SOGA1	suppressor of glucose, autophagy associated 1	60.07	45.68	46.21	87.07	48.43	55.88	71.41	53.22	86.14	5.75e-05	0.537
Q69YQ0	SPECC1L	sperm antigen with calponin homology and coiled-coil domains 1-like	37.4	77.64	71.6	51.29	38.98	37.74	26.46	34.7	42.62	0.000849	0.79
Q9Y6N5	SQRDL	sulfide quinone reductase-like (yeast)	35.01			60.28	60.57	65.13	73.78	63.44	93.13	1.36e-05	0.718
Q7Z6B7	SRGAP1	SLIT-ROBO Rho GTPase activating protein 1	34.22	44.81	43.27	30.23	35.64	37.04	41.79	37.74	51.02	0.00416	0.664
O75044	SRGAP2	SLIT-ROBO Rho GTPase activating protein 2		34.15	32.39	38.98	23.99	56.04	48.5	48.37	57.49	0.0287	0.603
Q9UHB9	SRP68	signal recognition particle 68kDa	74.11	97.71	122.8	96.76	138.1	116.93	110.33	117.16	164.18	7.46e-06	0.577
Q08945	SSRP1	structure specific recognition protein 1	33.32		23.51	85.98	70.58	62.98	51.68	61.38	58.35	2.79e-14	0.00903
O15056	SYNJ2	synaptojanin 2	117.71	140.21	160.81	150.45	125.25	117.11	90.96	141.17	121.14	9.93e-11	0.5
Q9C0D5	TANC1	tetratricopeptide repeat, ankyrin repeat and coiled-coil containing 1	37.03		36.97	31.12	47.37	31.38	32.32	28.84	32.59	4.03e-06	0.0247
Q13148	TARDBP	TAR DNA binding protein	60.3	43.55	27.46	51.69	80.43	68.84	72.23	68.03		0.00724	0.66
Q9BYX2	TBC1D2	TBC1 domain family, member 2	25.79		20.67	30.35	22.01	20.98			42.74	0.0552	0.797
O60343	TBC1D4	TBC1 domain family, member 4		86.45	80.21	85.84	87.17	85.73	204.24	186.14	240.6	6.31e-10	0.533
Q9UGI8	TES	testin LIM domain protein	31.68	44.57	54.18	34.4	34.04	36.46	123.36	27.29	47.3	3.58e-06	0.591
Q07157	TJP1	tight junction protein 1				31.52	40.45	25.81	39	43.32	32.81	0.0109	0.0491
Q9UDY2	TJP2	tight junction protein 2				56.45	54.68	20	71.06		49.1	9.77e-11	0.624
P29401	TKT	transketolase	50.58	55.78	40.9	70.66	37.06	51.84	46	44.43	88.14	0.000554	0.509
Q9C0C2	TNKS1BP1	tankyrase 1 binding protein 1, 182kDa	68.39	41.12	40.68	51.86	46.64	42.03	79.71	77.1	59.2	4.25e-08	0.343
Q68CZ2	TNS3	tensin 3	69.04	39.78	39.69	43.78	61.81	73.13	69.03	80.4	58.9	4.19e-07	0.341
O14545	TRAFD1	TRAF-type zinc finger domain containing 1				47.05	67.75		67.36	102.76	70.57	0.00287	0.157
Q13263	TRIM28	tripartite motif containing 28	75.06	138.77	159.09	182.98	201.63	167.76	262.54	263.31	192.25	9.9e-20	0.859
O75962	TRIO	trio Rho guanine nucleotide exchange factor		39.63	27.34	67.57	26.86	52.93	46.51	70.06	71.03	0.000342	0.777
Q9H2D6	TRIOBP	TRIO and F-actin binding protein	229.12	217.44	190.9	191.99	116.88	138.61	195.59	257.75	310.37	4.72e-14	0.745
Q15650	TRIP4	thyroid hormone receptor interactor 4	60.12	65.27	42.27	60.26	65.66	78.06	71.97	104.14	52.48	7.47e-05	0.823
Q15654	TRIP6	thyroid hormone receptor interactor 6	39.19	27.04	34.54	65.48	62.45	45.88	62.49	102.28	58.09	6.4e-09	0.491
P68363	TUBA1B	tubulin, alpha 1b	469.5	380.19	480.52	345.38	327.63	391	525.94	579.22	489.85	9.9e-20	0.882
Q9BQE3	TUBA1C	tubulin, alpha 1c	414.37	330.08	440.12	320.22	310.14	376.56	457.32	531.57	452.56	9.9e-20	0.799
P07437	TUBB	tubulin, beta class I	818.02	645.69	791.75	677.68	717.63	726.39	883.27	874.2	959.85	9.9e-20	0.998
Q13885	TUBB2A	tubulin, beta 2A class IIa	518.37	377.45	462.72	493.26	499.45	543.05	629.21	623.78	713.07	9.9e-20	0.998
Q13509	TUBB3	tubulin, beta 3 class III	524.02	312.38	424.38	410.99	409.93	442.65	478.38	449.83	536.55	9.9e-20	0.963
P68371	TUBB4B	tubulin, beta 4B class IVb	667.99	529.3	667.96	520.42	538.38	583.5	807.77	705.07	825.62	9.9e-20	0.996
Q9BUF5	TUBB6	tubulin, beta 6 class V	259.88	170.02	206.02	243.46	184.14	214.87	319.84	297.68	312.17	9.9e-20	0.991
P49411	TUFM	Tu translation elongation factor, mitochondrial	201.93	229.63	184.31	198.15	252.66	224.52	409.78	474.09	424.78	9.9e-20	0.358
Q9BZF9	UACA	uveal autoantigen with coiled-coil domains and ankyrin repeats	51.75	40.4	79.81	79.5	149.21	151.04	126.62	135.91	220.13	1.11e-16	0.287
Q14157	UBAP2L	ubiquitin associated protein 2-like	78.86	69.24	58.46	77.31	74.53	57.72	124.89	125.29	109.88	1.95e-11	0.208
Q96PU4	UHRF2	ubiquitin-like with PHD and ring finger domains 2, E3 ubiquitin protein ligase	104.44	54.6	68.73	98.18	63.99	77.21	110.31	127.59	102.57	0.00143	0.22
Q92900	UPF1	UPF1 regulator of nonsense transcripts homolog (yeast)	57.67	43.51	47.17	70.02	51.61	55.07	59.21	70.35	70.22	4.56e-05	0.698
Q9HAU5	UPF2	UPF2 regulator of nonsense transcripts homolog (yeast)	32.23		42.5	51.77	24.5	41.75	71.74	71.04	21.59	1.35e-06	0.849
Q14694	USP10	ubiquitin specific peptidase 10	72.47	49.99	43.37	69.12	44.7	64.18	94.14	88.61	41.02	1.46e-07	0.338
P50552	VASP	vasodilator-stimulated phosphoprotein		28.38	48.18	37.95	36.83	37.92	34.92		20.76	0.0794	0.78
P08670	VIM	vimentin	61.74	47.52	80.78	73.59	82.61	72.2	82.64	111.48	79.6	1e-08	0.0339
Q9ULE0	WWC3	WWC family member 3				30.39	28.73	36.67			42.52	0.00869	0.368
O00308	WWP2	WW domain containing E3 ubiquitin protein ligase 2				30.61		41.03	43.75	24.38	43.7	0.00269	0.079
Q9H0D6	XRN2	5'-3' exoribonuclease 2	56.24	57.09	43.97	46.78	39.47	55.43	44.07	56.14	55	0.00184	0.0842
P67809	YBX1	Y box binding protein 1	44.57	71.24	48.01	93.71	40.2	69.76	74.75	60.47	70.11	4.92e-10	0.000213
Q9UPT8	ZC3H4	zinc finger CCCH-type containing 4		48.66	48.58	32.7	65.2	21.16	58.93	114.4	54.07	2.08e-13	0.0332
Q8IWR0	ZC3H7A	zinc finger CCCH-type containing 7A	28.76	22.47	23.24	47.67	22.57	29.44	52.18	21.19		0.000743	0.476
Q7Z2W4	ZC3HAV1	zinc finger CCCH-type, antiviral 1	230.43	203.47	247.65	267.9	191.19	208.3	268.8	237.64	255.57	2.22e-16	0.768
Q15942	ZYX	zyxin	212.3	212	204.83	334.69	280.67	239.52	292.4	460.09	307.22	9.9e-20	0.0446

## Sheet: Table S4B
Table S4B: Specific partners of FKBP7 in IGR-CaP1-Dtx-R cells
ID	Gene symbol	Full Name	score 1 IgG	score 2 IgG	score 3 IgG	score 1 IP1-FKBP7	score 2 IP1-FKBP7	score 3 IP1-FKBP7	score 1 IP2-FKBP7	score 2 IP2-FKBP7	score 3 IP2-FKBP7	Pvalue_IP1	Pvalue_IP2
P49588	AARS	alanyl-tRNA synthetase	93.9	132.95	170.39	116.37	137.62	52.68			28.2	0.0137	0.000141
Q5JTZ9	AARS2	alanyl-tRNA synthetase 2, mitochondrial	23.34	53.96		131	116.96	114.27	89.65	80.28	109.72	0.00375	3.12e-09
P08183	ABCB1	ATP-binding cassette, sub-family B (MDR/TAP), member 1	170.35	292.77	252.67	253.03	257.11	273.85	324.41	438.28	411.62	0.00204	3.74e-13
P61221	ABCE1	ATP-binding cassette, sub-family E (OABP), member 1		46.35	56.93	63.06	78.81	75.82	102.3	66.49	46.59	0.0259	1.58e-08
Q8NE71	ABCF1	ATP-binding cassette, sub-family F (GCN20), member 1		39.67		215.53	257.09	318.77	112.93	72.77	73.73	0.000107	1.11e-16
Q9UG63	ABCF2	ATP-binding cassette, sub-family F (GCN20), member 2		58.54	36.84	113.62	217.48	118.66	84.14	107.28	78.47	0.000409	9.9e-20
Q9NUQ8	ABCF3	ATP-binding cassette, sub-family F (GCN20), member 3				89.74	38.34	55.05	39.79	42.02		0.0537	6.41e-05
Q8IZP0	ABI1	abl-interactor 1	40.15	58.43	50.11	100.81	78.56	106.42	90.05	93.29	57.58	0.139	0.000198
P42684	ABL2	ABL proto-oncogene 2, non-receptor tyrosine kinase	20.62			46.28	44.45			56.09
Q13085	ACACA	acetyl-CoA carboxylase alpha				175.82	120.55	203.54	24	32.49	43.03	0.00105	1.08e-14
P53396	ACLY	ATP citrate lyase	213.69	202.43	404.76	93.98	102.5	116.35	123.68	195.89	146.58	0.102	0.000422
Q9Y305	ACOT9	acyl-CoA thioesterase 9	28.24	65.68	79.32	188.48	143.34	152.87	81.66	77.37	81.6	0.0569	3.15e-12
O95573	ACSL3	acyl-CoA synthetase long-chain family member 3		30.79		131.99	109.79	128.18	70.01	67.39	46.83	0.00487	0.000167
P60709	ACTB	actin, beta	4288.18	5162.88	4821.35	5781.7	5748.72	5921.68	8130.79	7812.08	7815.77	1.11e-16	9.9e-20
Q562R1	ACTBL2	actin, beta-like 2	1106.61	1247.43	1234.18	1466.11	1267.3	1470.48	1394.09	1429.41	1426.88	0.00484	9.9e-20
P68032	ACTC1	actin, alpha, cardiac muscle 1	2385.17	2603.12	2541.53	3027.76	2802.73	2879.06	5347.43	5033.48	5055.48	9.9e-20	9.9e-20
P12814	ACTN1	actinin, alpha 1	618.19	687.83	642.62	659.73	623.32	676.26	431.13	340.74	372.46	0.00033	9.9e-20
O43707	ACTN4	actinin, alpha 4	1457.8	1718.24	1545.81	1661.84	2244.96	2034.19	1024.84	775.64	734.59	4.01e-05	9.9e-20
P61160	ACTR2	ARP2 actin-related protein 2 homolog (yeast)	110.83	131.61	204.37	434.43	483.95	277.11	203.89	193.92	219.73	0.0023	4.76e-10
P61158	ACTR3	ARP3 actin-related protein 3 homolog (yeast)	137.93	110.85	134.75	82.59	163.37	137.15	159.88	109.4	174.87	0.00269	9.9e-20
Q9P2N4	ADAMTS9	ADAM metallopeptidase with thrombospondin type 1 motif, 9				36.25	37.77
Q9H2P0	ADNP	activity-dependent neuroprotector homeobox				42.65	37.21			27.93
Q09666	AHNAK	AHNAK nucleoprotein	214.77	444.4	386.68	974.91	1379.46	1189.81	978.65	791.04	770.73	3.87e-07	9.9e-20
Q9BQI0	AIF1L	allograft inflammatory factor 1-like	21.47	38.51	66.14	63.44	52.44	66.42				0.129	6.89e-08
Q12904	AIMP1	aminoacyl tRNA synthetase complex-interacting multifunctional protein 1	63.59	79.22	58.19	173.73	201.25	193.43	154.01	169.59	147.77	0.00936	1.85e-12
Q13155	AIMP2	aminoacyl tRNA synthetase complex-interacting multifunctional protein 2	24.76	46.32	53.05	159.27	79.22	135.29	64.31	76.02	60.84	0.0673	9.83e-05
Q9Y3D8	AK6	adenylate kinase 6				63.12	55.04	53.52
Q12802	AKAP13	A kinase (PRKA) anchor protein 13				163.24	197.31	177.83	120.3	79.29	94.12	1.24e-06	1.11e-16
Q99996	AKAP9	A kinase (PRKA) anchor protein 9				175.72	111.51	214.21				0.000544	3.24e-08
P54886	ALDH18A1	aldehyde dehydrogenase 18 family, member A1	309.15	268.86	392.23	380.08	496.68	338.22	370.52	443.1	530.43	0.00101	9.9e-20
Q86V81	ALYREF	Aly/REF export factor			56.82	172.35	203.31	129.53	292.17	267.83	231.99	0.254	4.52e-06
Q9Y303	AMDHD2	amidohydrolase domain containing 2				297.66	390.11	400.53	354.01	304.25	271.19	0.00193	2.2e-10
Q01433	AMPD2	adenosine monophosphate deaminase 2				39.45		40.94	50.6	64.86	52.78	0.0109	1.4e-05
P16157	ANK1	ankyrin 1, erythrocytic				118.42	130.89	111.49	63	81.26	29.19	0.00667	0.000842
Q01484	ANK2	ankyrin 2, neuronal		26.71	44.79	36.54	39.53	28.48	23.82	25.88	38.7	0.245	0.00928
Q12955	ANK3	ankyrin 3, node of Ranvier (ankyrin G)		26.71	25.03	39.57	55.74		56.31	38.76	55.25	0.0413	4.89e-05
Q9P2R3	ANKFY1	ankyrin repeat and FYVE domain containing 1				45.98		27.51			25.04	0.0535	0.019
Q8IWZ3	ANKHD1/ANKHD1-EIF4EBP3	ankyrin repeat and KH domain containing 1				77.4	59.6	81.59	47.26		29.2	0.0116	2.68e-06
Q9H8Y5	ANKZF1	ankyrin repeat and zinc finger domain containing 1	24.56	34.59	88.25	172.73	117.1	169.41	54.83	92.79	64.5	0.0079	5.37e-07
Q9NQW6	ANLN	anillin actin binding protein	41.35	77.25	73.19	410.17	474.13	399.95	284.1	237.03	226.21	4.19e-07	9.9e-20
P07355	ANXA2	annexin A2	186.12	143.77	262.15	499.47	565.17	478.76	232.48	207.63	211.16	0.000931	6.42e-09
Q10567	AP1B1	adaptor-related protein complex 1, beta 1 subunit				215.62	191.34	152.94				0.00539	2.17e-05
O43747	AP1G1	adaptor-related protein complex 1, gamma 1 subunit				46.56	45.48	72.54				0.0247	0.000954
O95782	AP2A1	adaptor-related protein complex 2, alpha 1 subunit	25.29	48.7	72.09	219.29	274.43	322.79	39.16	38.72		0.000301	3.86e-10
O94973	AP2A2	adaptor-related protein complex 2, alpha 2 subunit	20.94	71.11	109.96	442.81	575.59	466.39	93.28	176.14	149.94	0.00417	1.11e-16
P63010	AP2B1	adaptor-related protein complex 2, beta 1 subunit	32.34	40	40.02	414.43	328.47	319.99	31.2	28.92	31.71	0.0199	1.07e-09
Q96CW1	AP2M1	adaptor-related protein complex 2, mu 1 subunit	81.35	53.31	97	427.05	352.13	328.03	209.27	205.65	182.24	1.13e-05	9.9e-20
O00203	AP3B1	adaptor-related protein complex 3, beta 1 subunit	125.04	140.5	172.59	398.62	377.9	506.4	269.45	135.31	207.51	1.75e-06	9.9e-20
O14617	AP3D1	adaptor-related protein complex 3, delta 1 subunit	131.75	101.35	173.26	284.99	299.91	264.97	158.84	157.81	143.46	0.0158	1.02e-14
Q9Y2T2	AP3M1	adaptor-related protein complex 3, mu 1 subunit	25.3	24.27	35.88	212.84	187.89	208.17	102.14	26.25	86.73	0.296	4.53e-06
Q92572	AP3S1	adaptor-related protein complex 3, sigma 1 subunit		46.36	51.71	125.1	168.61	213.69	188.99	68.11	111.1	0.0126	5.43e-05
Q06481	APLP2	amyloid beta (A4) precursor-like protein 2				52	126.18	86.79	40.62	25.83	36.77	0.174	0.0466
Q9HDC9	APMAP	adipocyte plasma membrane associated protein		36.14	23.82	35.47	32.07	23.37
Q8NEU8	APPL2	adaptor protein, phosphotyrosine interaction, PH domain and leucine zipper containing 2		78.53		133.66	90.81	178.22	330.57	239.41	232.24	0.0578	2.95e-08
O60306	AQR	aquarius intron-binding spliceosomal factor				43.07	67.38	39.74
P48444	ARCN1	archain 1			49.06	128.85	86.42	154.58	65.89	49.28	60.14	0.0248	0.0112
O15013	ARHGEF10	Rho guanine nucleotide exchange factor (GEF) 10				97.28	120.39	107.1				0.29	1.56e-09
Q9NZN5	ARHGEF12	Rho guanine nucleotide exchange factor (GEF) 12	70.09	103.55	83.86	189.11	126.47	188.9	121.55	114.42	142.48	0.000267	9.9e-20
Q96PE2	ARHGEF17	Rho guanine nucleotide exchange factor (GEF) 17				37.34	20.8	36.76	34.1	30.92	21.03	0.00103	7.58e-07
Q92974	ARHGEF2	Rho/Rac guanine nucleotide exchange factor (GEF) 2	227.99	322.65	247.32	1127.44	1191.83	1130.17	792.75	816.33	789.23	7.6e-07	9.9e-20
Q8N1W1	ARHGEF28	Rho guanine nucleotide exchange factor (GEF) 28				52.01	52.46					0.298	0.00554
Q14155	ARHGEF7	Rho guanine nucleotide exchange factor (GEF) 7		23.69	22.53	128.25	209.39	189.54	108.83	79.76	77.48	0.259	9.31e-09
P40616	ARL1	ADP-ribosylation factor-like 1		102.39		58.59	74.93	66.69	100.64	101.68	94.73	0.583	0.0227
Q8IUR7	ARMC8	armadillo repeat containing 8				63.01		65.06
O15143	ARPC1B	actin related protein 2/3 complex, subunit 1B, 41kDa	72.63	128.65	127.32	169.7	207.07	174.34	171.38	161.5	152.33	2.9e-05	3.28e-09
O15144	ARPC2	actin related protein 2/3 complex, subunit 2, 34kDa	103.77	163.82	183.01	82.22	140.73	147.74	89.38	75.32	79.93	0.00196	1.46e-08
Q9ULH1	ASAP1	ArfGAP with SH3 domain, ankyrin repeat and PH domain 1				224.8	233.42	272.82	70.5	93.22	90.25	0.00131	1.92e-12
Q8N9N2	ASCC1	activating signal cointegrator 1 complex subunit 1				47.44	37.13	30.49	30.06		39.97	0.0474	4.95e-08
Q9H1I8	ASCC2	activating signal cointegrator 1 complex subunit 2		36.96	66.95	195.28	98.3	151.87	27.94			0.729	0.26
Q8N3C0	ASCC3	activating signal cointegrator 1 complex subunit 3	56.92	159.5	90.51	387.77	478.87	308.31	165.92	185.86	146.44	1.69e-05	1.11e-16
P08243	ASNS	asparagine synthetase (glutamine-hydrolyzing)	86.56	84.4	42.63	109.47	117.98	134.33	39.59	60.08	38.94	0.000856	6.04e-09
Q12797	ASPH	aspartate beta-hydroxylase	98.11	184.61	94.91	359.19	271.93	356.36	254.49	276.37	156.25	0.00175	9.9e-20
P16615	ATP2A2	ATPase, Ca++ transporting, cardiac muscle, slow twitch 2		88.47	107.78	51.27	46.1	43.5	55.17	48.79	25.39	0.017	2.14e-07
P25705	ATP5A1	ATP synthase, H+ transporting, mitochondrial F1 complex, alpha subunit 1, cardiac muscle	82.1	123.77	108.95	139.99	170.05	193.83	136.97	117.19	147.61	0.0149	1.72e-14
P46100	ATRX	alpha thalassemia/mental retardation syndrome X-linked				117.71	72.28	143.85	116.36	113.4	112.47	0.0196	2.62e-08
Q99700	ATXN2	ataxin 2		47.78		84.16	93.66	103.01	122.07	37.89	76.34	0.0144	4.62e-07
Q8WWM7	ATXN2L	ataxin 2-like	38.98	71.09	83.9	148.72	201.75	168.58	154.49	168.76	150.44	2.32e-06	9.9e-20
Q13825	AUH	AU RNA binding protein/enoyl-CoA hydratase	23.68	71.14	29.17	86.14	93.92	75.12	63.43	39.15	48.89	0.00165	3.8e-08
O94766	B3GAT3	beta-1,3-glucuronyltransferase 3		26.69		81.86	87.79	44.67
O95816	BAG2	BCL2-associated athanogene 2	82.54	77.01		111.02	137.94	88.27	43.66	56.44	70.29	0.0302	2.75e-07
O95817	BAG3	BCL2-associated athanogene 3	56.06	46.48	55.5	55.92	52.38	49.86	27.92			0.0144	8.96e-07
Q9UHR4	BAIAP2L1	BAI1-associated protein 2-like 1	30.2	76.56	103.6	163.11	139.3	120.75	134.31	71.03	106.86	0.00504	5.33e-10
P11274	BCR	breakpoint cluster region	24.71	62.47	22.13	246.6	168.32	209.4	200.73	168.66	239.56	0.00702	1.47e-14
Q9H694	BICC1	BicC family RNA binding protein 1				46.16	109.68	57.22	36.42	31.96	24.66	0.00317	4.2e-07
Q9NR09	BIRC6	baculoviral IAP repeat containing 6				236.69	275.96	252.79	91.68	144.42	73.96	0.031	6.41e-05
Q9NSY1	BMP2K	BMP2 inducible kinase				56.61	40.58	56.43	45.09		37.1
Q6PJG6	BRAT1	BRCA1-associated ATM activator 1				37.26
Q10589	BST2	bone marrow stromal cell antigen 2			21.7	40.6	36.51	51.62	43.97	59.66	29.25
O14981	BTAF1	BTAF1 RNA polymerase II, B-TFIID transcription factor-associated, 170kDa				50.08	27.49					0.00238	0.42
P20290	BTF3	basic transcription factor 3	20.58	33.98	47.04	84.35	106.54	63.34	34.33	41.94	35.08	0.45	0.0452
Q9Y224	C14orf166	chromosome 14 open reading frame 166	70.56	66.11	58.61	365.47	423.06	479.99	189.59	130.88	250.51	0.126	4.56e-07
Q9BU76	C1orf35	chromosome 1 open reading frame 35				91.03	158.23	117.09	58.24	74.21	21.75
Q9H6R7	C2orf44	chromosome 2 open reading frame 44	25.94	50.55	34.66	42.82	58.11	54.31	38.38	41.78	41.89	0.00463	7.58e-05
Q8WWC4	C2orf47	chromosome 2 open reading frame 47				44.22	42.02	36.02
Q9BRJ6	C7orf50	chromosome 7 open reading frame 50			23.15	41.3	29.33	41.55		24.21		0.0211	0.000441
Q8WUQ7	CACTIN	cactin, spliceosome C complex subunit				45.71		51.31	33.84	33.49
P27708	CAD	carbamoyl-phosphate synthetase 2, aspartate transcarbamylase, and dihydroorotase	583.78	586.69	576.9	1716.07	1917.95	2066.12	1007.75	1050.2	1121.28	6.21e-06	9.9e-20
Q05682	CALD1	caldesmon 1	58.94	95.76	122.4	236.03	189.98	168.44	198.95	246.35	241.31	1.68e-06	9.9e-20
P62158	CALM1	calmodulin 1 (Phosphorylase Kinase, Delta)	451.61	559.39	517.97	581.72	567.07	558.85	541.2	590.56	579.71	0.0448	8.43e-13
O43852	CALU	calumenin	46.02	100.97	68.74	243.97	310.52	286.67	200.17	152.68	144.21	0.00491	3.42e-10
Q13557	CAMK2D	calcium/calmodulin-dependent protein kinase II delta	127.78	283.62	184.35	550.99	697.33	534.74	223.65	234.01	283.32	0.000218	1.23e-10
Q13555	CAMK2G	calcium/calmodulin-dependent protein kinase II gamma	55.95	55.73	64.04	220.57	275.18	223.39	81.7	76.03	89.62	0.0535	1.04e-08
Q14444	CAPRIN1	cell cycle associated protein 1	222.97	289.38	259.1	410.53	412.79	381.55	345.24	379.12	413.41	2.27e-05	9.9e-20
P52907	CAPZA1	capping protein (actin filament) muscle Z-line, alpha 1	98.65	102.53	108.62	141.85	155.27	160.33	134.6	106.62	103.66	0.0781	4.86e-09
P47756	CAPZB	capping protein (actin filament) muscle Z-line, beta	129.81	197.92	152.53	164.11	134.72	146.11	162.97	153.42	114.94	0.000153	6.53e-10
Q9HA77	CARS2	cysteinyl-tRNA synthetase 2, mitochondrial (putative)		43.73	27.76	286.04	370.33	308.92	190.89	229.92	205.71	0.0107	5.27e-10
P04040	CAT	catalase	23.7	27.96	47.39	151.46	144.4	177.6	182.61	153.3	99.12	0.00388	1.17e-10
Q6P1N0	CC2D1A	coiled-coil and C2 domain containing 1A				39.77			22.31	29.31	31.71
Q96CT7	CCDC124	coiled-coil domain containing 124	62.42	45.13	65.45	81.01	112.97	103.93	117.33	92.24	148.77	0.0074	1.49e-11
Q16204	CCDC6	coiled-coil domain containing 6			0	55.35	134.52	70.06		24.75		0.00576	1.34e-08
Q3V6T2	CCDC88A	coiled-coil domain containing 88A		20.43	34.09	700.71	1034.25	1089.02	676.62	597.16	490.88	3.22e-14	9.9e-20
O43303	CCP110	centriolar coiled coil protein 110kDa				216.71	223.17	205.26	42.67	49.95	66.98	0.00392	9.85e-08
P78371	CCT2	chaperonin containing TCP1, subunit 2 (beta)	341.32	537.26	405.77	822.88	986.79	1021.89	1027.25	1151.25	1005.21	9.85e-05	9.9e-20
P49368	CCT3	chaperonin containing TCP1, subunit 3 (gamma)	182.93	381.69	197.9	684.03	626.75	670.52	624.22	646.49	643.89	0.000289	9.9e-20
P50991	CCT4	chaperonin containing TCP1, subunit 4 (delta)	349.79	414.31	396.28	656.43	763.23	632.66	592.12	528.93	566.86	1.87e-05	9.9e-20
P48643	CCT5	chaperonin containing TCP1, subunit 5 (epsilon)	203.63	357.75	314.2	682.34	968.16	774.99	668.95	589.26	595.21	9.54e-05	9.9e-20
P40227	CCT6A	chaperonin containing TCP1, subunit 6A (zeta 1)	316.33	243.78	288	451.7	627.06	539.9	663.91	561.57	621.8	1e-06	9.9e-20
Q99832	CCT7	chaperonin containing TCP1, subunit 7 (eta)	150.17	247.2	199.81	510.55	603.4	653.75	546.83	726.41	722.89	9.23e-05	9.9e-20
P50990	CCT8	chaperonin containing TCP1, subunit 8 (theta)	432.82	463.08	434.08	919.56	959.21	1088.98	800.58	946.9	1041.25	1.61e-06	9.9e-20
Q12834	CDC20	cell division cycle 20				91.44	76.93	194.34	94.76	64.36	64.56	0.00501	4.31e-12
P60953	CDC42	cell division cycle 42			53.38	38.26			51.06		33.35
Q5VT25	CDC42BPA	CDC42 binding protein kinase alpha (DMPK-like)	62.62	73.09	79.67	287.95	333.75	370.74	227.06	140.56	235.71	0.000276	9.9e-20
Q9Y5S2	CDC42BPB	CDC42 binding protein kinase beta (DMPK-like)	147.63	234.72	252.5	506.85	405.75	653.3	274.29	281.99	190.54	1.62e-05	9.9e-20
Q00587	CDC42EP1	CDC42 effector protein (Rho GTPase binding) 1				57.72	45.23	92.15	38.18	78.42	85.27	0.258	1.83e-06
O14735	CDIPT	CDP-diacylglycerol--inositol 3-phosphatidyltransferase	28.01		43.21	54.68	31.03
P06493	CDK1	cyclin-dependent kinase 1	82.78	134.17	108.31	195.78	255.63	212.56	132.34	174.3	195.5	0.00437	9.9e-20
Q96SN8	CDK5RAP2	CDK5 regulatory subunit associated protein 2				88.84	62.8	24.75	44.9	54.56	0	0.0137	1.01e-05
Q9BXW7	CECR5	cat eye syndrome chromosome region, candidate 5	66.77	95.47	83.53	135.6	172.13	182.77	165.48	154.1	172.94	0.0138	2.37e-06
Q9UPN4	CEP131	centrosomal protein 131kDa				127.81	110.65	134.31	91.97	56.47	43.99	0.011	0.0018
Q66GS9	CEP135	centrosomal protein 135kDa				43.38	32.54	35.03
Q5SW79	CEP170	centrosomal protein 170kDa	42.93	60.33	33.3	253.06	389.9	303.04	209.35	304.15	265.2	8.57e-07	9.9e-20
Q9Y4F5	CEP170B	centrosomal protein 170B				59.2	86.84	85.92	60.05	44.64		0.00661	5.63e-11
Q5JTW2	CEP78	centrosomal protein 78kDa				36.75	45.95	52.65				0.0441	4.87e-05
Q6P2H3	CEP85	centrosomal protein 85kDa				51.38	30.49	43.87
Q8IW35	CEP97	centrosomal protein 97kDa				210.7	204.37	170.13	74.45	103.1	106.87	0.0118	3.13e-07
P41208	CETN2	centrin, EF-hand protein, 2				103.11	68.88	85.27			33.66	0.0188	0.000902
Q9NX63	CHCHD3	coiled-coil-helix-coiled-coil-helix domain containing 3	23.85	39.06	51.29	88.83	77.43	61.01	96.92	108.73	76.13
Q12873	CHD3	chromodomain helicase DNA binding protein 3				172.78	197.9	115.29	25.69	32.54	0	0.0071	0.135
Q14839	CHD4	chromodomain helicase DNA binding protein 4		52.8	50.85	244.96	257.32	196.57	50.23	86.68	38.66	0.0135	2.39e-13
Q9NZZ3	CHMP5	charged multivesicular body protein 5			57.3	99.41	98.07	110.08	98.41	113.14	109.96	0.802	0.207
Q99653	CHP1	calcineurin-like EF-hand protein 1				46.8	99.18
Q9Y3Y2	CHTOP	chromatin target of PRMT1				82.04	72.97	90.51	70.25	93.04	94.28	0.0718	0.000105
Q14011	CIRBP	cold inducible RNA binding protein		39.19	48.22	46.62	65.85	91.5	31.06	46.5	59.56	0.117	0.00633
O14578	CIT	citron rho-interacting serine/threonine kinase	38.24	62.9		198.34	211.47	150.19	169.54	154.81	163.2	4.32e-05	9.9e-20
Q07065	CKAP4	cytoskeleton-associated protein 4	328.15	515.06	404.86	781.59	976.03	924.87	574.73	538.38	540.23	4.53e-06	9.9e-20
Q14008	CKAP5	cytoskeleton associated protein 5	99.78	138.58	152.98	578.24	540.39	593.11	247.97	182	203.42	0.000237	9.9e-20
P12532	CKMT1A	creatine Kinase, Mitochondrial 1A	301.63	410.62	385.6	669.53	897.23	851.55	480.67	550.67	501.36	0.00043	9.9e-20
Q7Z460	CLASP1	cytoplasmic linker associated protein 1				62.57	49.3	23.65	22.65	35.14	31.07	0.00347	1.18e-06
O75122	CLASP2	cytoplasmic linker associated protein 2	26.98	56.58	53.84	364.73	245.71	390.34	313.02	294.57	368.84	0.00388	1.24e-14
Q9H078	CLPB	ClpB homolog, mitochondrial AAA ATPase chaperonin			68.28	125.49	105.02	124.55	20.82	85.89	79.83	0.00501	4.63e-07
O76031	CLPX	caseinolytic mitochondrial matrix peptidase chaperone subunit				45.09	86.13	61.4		34.34
Q00610	CLTC	clathrin, heavy chain (Hc)	169.46	368.98	260.7	155.96	114.56	74.37	53.57	44.99	50.66	0.00498	1.59e-07
Q8N1G2	CMTR1	cap methyltransferase 1			29.69	109.55	66.87	103.56	68.79	85.83	61.52	0.004	8.08e-12
Q9P003	CNIH4	cornichon family AMPA receptor auxiliary protein 4				52.79	28.24	37.89				0.13	0.00557
A5YKK6	CNOT1	CCR4-NOT transcription complex, subunit 1		29.97		95.95	80.74	83.5	56.89	28.68		0.00684	3.35e-10
Q9UKZ1	CNOT11	CCR4-NOT transcription complex, subunit 11				40.27			40.59	39.98	40.5
Q9NZN8	CNOT2	CCR4-NOT transcription complex, subunit 2				107.4	32.76	103.98	57.02	50.04		0.0456	9.22e-08
P09543	CNP	2',3'-cyclic nucleotide 3' phosphodiesterase				36.33	40.37	40.89	34.12	25.75		0.0126	8.06e-05
Q8NBJ5	COLGALT1	collagen beta(1-O)galactosyltransferase 1	117.78	199.96	158.66	270.33	305.06	349.67	263.45	291.79	343.33	0.000155	9.9e-20
P53621	COPA	coatomer protein complex, subunit alpha	267.4	439.77	362.12	538.14	731.37	712.07	481.35	482.78	431.51	0.000278	9.9e-20
P53618	COPB1	coatomer protein complex, subunit beta 1			29.12	157.45	125.39	155.85	66.05	41.81	49.37	0.0271	1.4e-06
P35606	COPB2	coatomer protein complex, subunit beta 2 (beta prime)			42.33	170.67	106.9	185.68	67.6	104.57	104.67	0.00893	1.95e-07
O14579	COPE	coatomer protein complex, subunit epsilon	76.37	84.77	70.03	263.07	234.84	265.86	62.16	70.84	83.23	0.668	0.000193
Q9Y678	COPG1	coatomer protein complex, subunit gamma 1	42.63	45.98	65.33	85.38	91.71	117.73	120.2	169.68	156.63	0.00638	3.79e-08
Q9UBF2	COPG2	coatomer protein complex, subunit gamma 2	42.49	35.66	30.25	53.75	58.59	86.36			37.86	0.0188	0.000125
Q9BR76	CORO1B	coronin, actin binding protein, 1B	72.9	81.02	122.99	78.7	125.31	39.04	139.91	102.81	124.15	0.02	3.71e-11
Q16630	CPSF6	cleavage and polyadenylation specific factor 6, 68kDa				84.32	49.56
P50416	CPT1A	carnitine palmitoyltransferase 1A (liver)	24.07		23.25	104.6	92.92	107.92	105.32	85.49	101.38	0.0214	7.4e-05
P52943	CRIP2	cysteine-rich protein 2	24.09	28.34	34.08	123.19	162.46	141.11	105.96	101.53	113.47	0.00695	0.000445
O75534	CSDE1	cold shock domain containing E1, RNA-binding			38.7	42.46		33.66			20.01	0.00347	1.89e-06
P55060	CSE1L	CSE1 chromosome segregation 1-like (yeast)	60.57	37.47	40.84	55.13	31.34	35.18	48.57	33.03	31.34	0.285	0.145
P48729	CSNK1A1	casein kinase 1, alpha 1	38.29	33.25	59.22	86.75	127.54	125.89	28.45	87.13	43.09	0.00842	4.95e-09
P49674	CSNK1E	casein Kinase 1, Epsilon			20.36	36.35	68.1	33.81	20.09		55.43	0.0808	3.57e-05
P68400	CSNK2A1	casein kinase 2, alpha 1 polypeptide		50.04	50.17	50.56		95.48		40.63	30.95	0.131	0.000107
P19784	CSNK2A2	casein kinase 2, alpha prime polypeptide		24.31	28.74	55.61	49.29	25.3	46.45	49.6	45.59	0.447	7.24e-05
P67870	CSNK2B	casein kinase 2, beta polypeptide				57.85	103.95	120.26	44.48	55.4	70.61	0.358	0.0466
P21291	CSRP1	cysteine and glycine-rich protein 1	21.3	46.93	56.12	56.42	103.33	62.31	61.59	52.36	106.61	0.0055	8.88e-05
P35221	CTNNA1	catenin (cadherin-associated protein), alpha 1, 102kDa				39.9	55.95	86.39				0.00982	4.35e-08
O60716	CTNND1	catenin (cadherin-associated protein), delta 1	31.85	118.99	125.98	356.89	411.44	380.02	273.3	229.29	234.66	4.63e-05	7.99e-15
P17812	CTPS1	CTP synthase 1		36.16	28.7	56.81	71.83	104.6				0.233	0.0843
Q14247	CTTN	cortactin	72.58	63.6	114.37	176.64	253.44	203.25	295.31	219.38	128.88	3.89e-06	9.9e-20
Q69YN2	CWF19L1	CWF19-like 1, cell cycle control (S. pombe)				51.66	48.44	38.58		27.67	29.31	0.0378	0.00154
Q7L576	CYFIP1	cytoplasmic FMR1 interacting protein 1	167.76	191.48	142.61	421.47	426.15	394.35	149.56	123.19	136.11	0.00428	3.33e-16
Q96F07	CYFIP2	cytoplasmic FMR1 interacting protein 2	98.73	131.34	81.65	220.62	212.13	220.1	146.44	110.81	136.11	0.00669	1.98e-11
P53355	DAPK1	death-associated protein kinase 1	199.47	320.58	409.81	313.45	300.04	288.47	401.57	420	423.71	0.00087	9.9e-20
P14868	DARS	aspartyl-tRNA synthetase	276.37	304.62	328.64	628.32	628.17	580.66	447.53	357.43	378.53	1.76e-08	9.9e-20
Q6PI48	DARS2	aspartyl-tRNA synthetase 2, mitochondrial	20.23		21.43	44.53	49.44	27.54	66.42	22.05	57.46	0.128	2.17e-10
Q16643	DBN1	drebrin 1	328.42	403.29	274.12	476.33	502.76	479.86	513.94	395.18	516.88	5.82e-06	9.9e-20
P11182	DBT	dihydrolipoamide branched chain transacylase E2				54.08	56.9	43.52	22.27			0.0268	0.000652
Q5VU92	DCAF12L1	DDB1 and CUL4 associated factor 12-like 1				46.06	59.33	27.94			22.37	0.0699	0.000229
Q13561	DCTN2	dynactin 2 (p50)				52.36		39.19	49.49	68.84		0.0556	0.000167
Q9UJW0	DCTN4	dynactin 4 (p62)				37.37	66.33	78	25.24	32.19	29.4	0.0189	0.00218
Q8IWE4	DCUN1D3	DCN1, defective in cullin neddylation 1, domain containing 3				55.73
P39656	DDOST	dolichyl-diphosphooligosaccharide--protein glycosyltransferase subunit (non-catalytic)	42.42	46.91	52.21	126.5	110.6	125.79	110.17	50.69	81.51	0.22	6.42e-05
Q92499	DDX1	DEAD (Asp-Glu-Ala-Asp) box helicase 1	69.4	85.34	104.01	318.02	380.54	442.56	107.74	135.28	204.76	0.0501	1.01e-09
Q92841	DDX17	DEAD (Asp-Glu-Ala-Asp) box helicase 17	556.47	604.28	613.77	883.78	870.18	843.23	680.74	796.97	666	1.41e-05	9.9e-20
Q9NR30	DDX21	DEAD (Asp-Glu-Ala-Asp) box helicase 21	24.76		63.43	241.44	151.15	307.73	185.4	90.12	178.84	0.000503	4.11e-15
Q9GZR7	DDX24	DEAD (Asp-Glu-Ala-Asp) box helicase 24				56.12	34.04	43.61				0.00029	5.94e-12
O00571	DDX3X	DEAD (Asp-Glu-Ala-Asp) box helicase 3, X-linked	223.91	356.42	287.7	557.25	706.25	446.64	380.9	364.03	380.89	1.59e-06	9.9e-20
Q9UJV9	DDX41	DEAD (Asp-Glu-Ala-Asp) box polypeptide 41		28.32	40.02	185.84	176.6	148.51	106.88	124.49	116.83	8.41e-05	9.9e-20
Q9H0S4	DDX47	DEAD (Asp-Glu-Ala-Asp) box polypeptide 47				142.26	189.28	193.16	71.78	102.76	80.13	0.0591	6.03e-07
Q9Y6V7	DDX49	DEAD (Asp-Glu-Ala-Asp) box polypeptide 49	78.35	77.65	64.11	78.82	64.95	72.64	72.77	59.22	78.8
P17844	DDX5	DEAD (Asp-Glu-Ala-Asp) box helicase 5	283.1	357.62	340.3	501.62	626.21	498.14	307.63	376.34	423.4	4.63e-06	9.9e-20
Q9Y2R4	DDX52	DEAD (Asp-Glu-Ala-Asp) box polypeptide 52				46.13	52.59	30.22			45.51	0.0858	0.00205
Q8TDD1	DDX54	DEAD (Asp-Glu-Ala-Asp) box polypeptide 54				125.79	145.64	137.49	26.5	72.7		0.069	0.0198
Q8NHQ9	DDX55	DEAD (Asp-Glu-Ala-Asp) box polypeptide 55				55.49	114.93
Q9NY93	DDX56	DEAD (Asp-Glu-Ala-Asp) box helicase 56				44.59	46.64	38.79	61.68	34.77	43.79	0.00281	2.24e-10
P26196	DDX6	DEAD (Asp-Glu-Ala-Asp) box helicase 6	57.82	53.45	51.02	118.61	152.54	205.97	46.88	56.94	66.11	0.00659	6.74e-06
Q16698	DECR1	2,4-dienoyl CoA reductase 1, mitochondrial	89.53	117.4	143.22	230.1	183.39	215.95	132.58	155.56	163.78	0.000111	9.9e-20
Q9H4E7	DEF6	DEF6 guanine nucleotide exchange factor	248.14	324.2	250.27	223.32	419.53	356.89	404.82	459.44	486.91	6.22e-06	9.9e-20
Q15392	DHCR24	24-dehydrocholesterol reductase				85.68	105.76	116.59	37.45	75.12	75.57	0.743	0.936
O43143	DHX15	DEAH (Asp-Glu-Ala-His) box helicase 15	144.36	152.32	281.81	644.82	570.1	591.23	335.84	326.07	309.36	5.75e-06	9.9e-20
O60231	DHX16	DEAH (Asp-Glu-Ala-His) box polypeptide 16	35.43	34.7	29.24	150.93	155.47	225.43	106.4	136.89	117.7	0.001	5.92e-14
Q7Z478	DHX29	DEAH (Asp-Glu-Ala-His) box polypeptide 29		85.62	164.18	469.71	456.84	504.39	406.48	357.66	354.56	0.187	9.9e-20
Q7L2E3	DHX30	DEAH (Asp-Glu-Ala-His) box helicase 30			51.93	194.78	166.72	246.75	77.81	58.2	119.57	5.36e-07	7.66e-14
Q14147	DHX34	DEAH (Asp-Glu-Ala-His) box polypeptide 34		27.94		35.58
Q9H2U1	DHX36	DEAH (Asp-Glu-Ala-His) box polypeptide 36				102.19	82.92	39.7	48.45			0.171	0.00188
Q8IY37	DHX37	DEAH (Asp-Glu-Ala-His) box polypeptide 37				89.95	79.54	24.06				0.00817	2.23e-11
Q92620	DHX38	DEAH (Asp-Glu-Ala-His) box polypeptide 38		31.01		181.96	92.7	91.76	112.43	80.54	45.92	0.00565	8.47e-07
Q8IX18	DHX40	DEAH (Asp-Glu-Ala-His) box polypeptide 40				39.14
Q6P158	DHX57	DEAH (Asp-Glu-Ala-Asp/His) box polypeptide 57		105.41	72.49	140.41	125.96	170.22	112.86	35.63	53.65	2.43e-05	5.69e-07
Q08211	DHX9	DEAH (Asp-Glu-Ala-His) box helicase 9	146.88	271.27	178.91	762.96	910.71	836.61	423.94	312.62	354.6	7.07e-08	9.9e-20
Q9Y2L1	DIS3	DIS3 homolog, exosome endoribonuclease and 3'-5' exoribonuclease	0	53.97	45.56	140.75	85.84	59.51	57.21		111.49	0.244	8.15e-09
P36957	DLST	dihydrolipoamide S-succinyltransferase (E2 component of 2-oxo-glutarate complex)				52.16	47.55	37.5
P31689	DNAJA1	DnaJ (Hsp40) homolog, subfamily A, member 1	25.83	85.31	28.68	311.17	338.93	281.33	134.22	148.67	104.58	0.24	1.88e-10
O60884	DNAJA2	DnaJ (Hsp40) homolog, subfamily A, member 2	35.94	71.29		84.08	49.65	131.83	32.56	24.9	39.53	0.0427	0.000477
Q96EY1	DNAJA3	DnaJ (Hsp40) homolog, subfamily A, member 3			27.99	84.7	137.86	85.76	35.56		22.85	0.223	0.00877
Q9UBS4	DNAJB11	DnaJ (Hsp40) homolog, subfamily B, member 11	52.43	50.79	48.41	149.34	130.5	201.23	39.05	33.74	56.3	0.0141	7e-05
Q8IXB1	DNAJC10	DnaJ (Hsp40) homolog, subfamily C, member 10				107.07	122.36	102.72		60.66		0.00837	4.88e-11
P50570	DNM2	dynamin 2	49	90.23	101.21	42.75		39.73				0.0675	2.06e-10
P26358	DNMT1	DNA (cytosine-5-)-methyltransferase 1	58.16	36.09	42.98	181.8	199.12	262.86	93	109.99	91.16	2e-08	1.11e-16
Q14185	DOCK1	dedicator of cytokinesis 1				57.38	59.92	76.79				0.00355	0.0161
Q96HP0	DOCK6	dedicator of cytokinesis 6	37.23	148.59	143.72	293.07	448.53	179.71	333.93	384.88	364.67	3.2e-07	9.9e-20
Q96N67	DOCK7	dedicator of cytokinesis 7	510.18	713.81	716.45	970.18	1205.13	1275.8	902.23	1073.59	1039.44	1.47e-12	9.9e-20
O60762	DPM1	dolichyl-phosphate mannosyltransferase polypeptide 1, catalytic subunit	27.36	49.9	65.01	43.95	83.4	82.94	48.95	69.18	81.56	0.00583	2.76e-12
Q9Y295	DRG1	developmentally regulated GTP binding protein 1	50.38	120.4	84.57	181.18	187.44	222.9	180.59	225.98	294.68	0.134	6.62e-11
Q14126	DSG2	desmoglein 2	28.01	104.94	81.39	155.18	209.71	164.58	244.34	291.95	244.41	0.114	9.9e-20
P15924	DSP	desmoplakin	478.55	630.32	540.12	1108.97	1259.74	1198.2	663.21	691.39	839.28	1.33e-15	9.9e-20
Q14204	DYNC1H1	dynein, cytoplasmic 1, heavy chain 1	216.64	423.03	385.88	287.96	415.04	383.45	353.59	275.13	316.71	1.91e-06	9.9e-20
Q5JPH6	EARS2	glutamyl-tRNA synthetase 2, mitochondrial		44.21		50.01	22.56	65.7	53.26	41.05	27.17	0.0412	0.000771
Q14213	EBI3	Epstein-Barr virus induced 3				56.73
Q6P2E9	EDC4	enhancer of mRNA decapping 4	28.92	40.84	21.53	271.07	369.61	455.68	219.67	171.93	229.4	0.000888	2.22e-16
P68104	EEF1A1	eukaryotic translation elongation factor 1 alpha 1	699.34	667.67	708.63	976.73	1050.32	1055.5	850.65	883.94	787.76	6.13e-08	9.9e-20
P24534	EEF1B2	eukaryotic translation elongation factor 1 beta 2		71.08	59.94	43.33	37.99	38.64				0.0941	0.00604
P29692	EEF1D	eukaryotic translation elongation factor 1 delta (guanine nucleotide exchange protein)		31.67	29.49	113.54	86.38	126.17	121.74	117.42	105.77	0.00327	7.43e-09
O43324	EEF1E1	eukaryotic translation elongation factor 1 epsilon 1	22.35	36.07	102.91	143.89	94.37	112.72			65.49	0.0378	0.000614
P26641	EEF1G	eukaryotic translation elongation factor 1 gamma	75.83	92.56	139.38	81.73	64.47	53.06	64.66	48.53	49.03	0.0616	0.00723
P13639	EEF2	eukaryotic translation elongation factor 2	545.01	522	485.77	906.12	901.17	819.07	621.25	822.12	708.43	3.45e-05	9.9e-20
Q9BUP0	EFHD1	EF-hand domain family, member D1	105.46	151.08	86.67	113.9	115.84	96.5	211.97	190.97	253.04	0.183	3.57e-07
Q96C19	EFHD2	EF-hand domain family, member D2	663.54	906.22	710.86	856.74	939.85	812.62	1197.08	1150.32	1116.36	5.28e-05	9.9e-20
Q15029	EFTUD2	elongation factor Tu GTP binding domain containing 2	71.06	43.83	58.95	198.74	296.8	319.31	159.13	215.23	193.91	0.0819	8.05e-10
P00533	EGFR	epidermal growth factor receptor	53.67	56.94	42.72	55.56	37.03	41.6	49.66	49.25	61.93
Q9H223	EHD4	EH-domain containing 4	22.91		59.64	118.49	88	93.93	82.91	64.96	90.85	0.118	7.16e-09
Q9BY44	EIF2A	eukaryotic translation initiation factor 2A, 65kDa				38.81	56.98	56.27	84.61	47.03	56.55	0.0168	1.09e-05
P19525	EIF2AK2	eukaryotic translation initiation factor 2-alpha kinase 2		106.08	81.93	91.13	46.39	85.05	46.44	31.71		0.0311	1.64e-06
Q9P2K8	EIF2AK4	eukaryotic translation initiation factor 2 alpha kinase 4		21.27		140.79	106.42	152.98	57.24	44.21	36.03	0.0271	9.23e-11
Q9UI10	EIF2B4	eukaryotic translation initiation factor 2B, subunit 4 delta, 67kDa				55.91	38.54	43.15
P05198	EIF2S1	eukaryotic translation initiation factor 2, subunit 1 alpha, 35kDa	116.77	195.61	251.54	481.01	578.87	532.89	254.31	210.28	318.95	0.000114	9.9e-20
P20042	EIF2S2	eukaryotic translation initiation factor 2, subunit 2 beta, 38kDa	68.85	147.98	78.16	213.91	266.12	281.53	155.12	141.43	118.1	0.024	2.79e-06
P41091	EIF2S3	eukaryotic translation initiation factor 2, subunit 3 gamma, 52kDa	144.37	105.86	90.76	203.16	190.73	332.14		46.42		0.00201	0.000272
Q14152	EIF3A	eukaryotic translation initiation factor 3, subunit A	92.15	102.71	155.95	89.97	78.13	99.34	115	102.72	70.16	0.0439	4.85e-10
Q99613	EIF3C	eukaryotic translation initiation factor 3, subunit C	53.03	56.96	89.19	107.85	88.81	86.57	75.61	65.98	72.51	0.0388	2.5e-06
O15371	EIF3D	eukaryotic translation initiation factor 3, subunit D		60.55	51.7	143.32	154.03	136.07	123.03	147.33	142	0.014	1.18e-06
P60228	EIF3E	eukaryotic translation initiation factor 3, subunit E		40.98	31.31	86.35	91.86	106.93	93.44	47.55	44.97	0.000695	2.39e-06
O00303	EIF3F	eukaryotic translation initiation factor 3, subunit F	42.83	119.6	106.62	186.3	175.68	130.97	224.26	156.99	243.23	0.281	5.49e-07
Q13347	EIF3I	eukaryotic translation initiation factor 3, subunit I	34.92		32.26	63.89	42.74	44.49	48.06	46.59	78	0.00169	5.69e-08
Q9Y262	EIF3L	eukaryotic translation initiation factor 3, subunit L	85.88	187.91	126.49	94.25	209.46	110.1	88.95	64.79	86.52	0.0043	1.79e-09
P60842	EIF4A1	eukaryotic translation initiation factor 4A1	546.98	762.13	794.82	1223.42	1489.03	1307.55	1065.62	1024.41	1076.78	0.000126	9.9e-20
P38919	EIF4A3	eukaryotic translation initiation factor 4A3	114.84	121.57	121	192.35	158.15	95.2	106.1	172.88	160.11	0.00121	1.6e-11
O60573	EIF4E2	eukaryotic translation initiation factor 4E family member 2				42.48	66.99	66.6	27.73		24.71	0.0242	2.7e-06
Q04637	EIF4G1	eukaryotic translation initiation factor 4 gamma, 1	36.96	52.95	62	82.27	75.75	80.13	126.06	113	192.57	3.36e-06	9.9e-20
P63241	EIF5A	eukaryotic translation initiation factor 5A				128.34	66.01	147.9	82.93	81.04	74.03	0.137	1.27e-05
O60841	EIF5B	eukaryotic translation initiation factor 5B	182.76	229.25	214.44	1029.21	1408.29	1179.45	623.51	788.35	614.29	1.21e-12	9.9e-20
Q9H9T3	ELP3	elongator acetyltransferase complex subunit 3				95.79	90.29	118.11			28	0.741	4.35e-08
Q8N766	EMC1	ER membrane protein complex subunit 1				96.52	85.05	65.85	61.21	52.04	69.74
Q9P0I2	EMC3	ER membrane protein complex subunit 3				52.13	32.7	40.11
P50402	EMD	emerin	27.45	42.33	33.87	106.29	104.86	96.64	118.51	95.59	99.92	0.0473	0.000147
Q92979	EMG1	EMG1 N1-specific pseudouridine methyltransferase	27.64	29.66	22.43	82.39	95.92	76.01	34.87	27.78	40.54	0.0111	0.000915
Q8N8S7	ENAH	enabled homolog (Drosophila)	45.7	41.35	36.94	37.02	68.2	58.89	100.58	67.45	42.03	5.07e-05	1.1e-07
O43491	EPB41L2	erythrocyte membrane protein band 4.1-like 2	104.24	241.43	283.23	345.71	450.63	322.04	287.16	273.41	264.52	3.08e-09	9.9e-20
P07814	EPRS	glutamyl-prolyl-tRNA synthetase	345.81	610.56	598.48	841.52	1190.05	1170.99	1048.59	1074.97	1132.63	7.11e-11	9.9e-20
Q9UBC2	EPS15L1	epidermal growth factor receptor pathway substrate 15-like 1				111.52	87.94	86.95			68.23	0.0369	0.00376
P04626	ERBB2	erb-b2 receptor tyrosine kinase 2	52.36	57.76	42.72	55.56	37.03	41.6	60.61	49.25	78.05
Q8IUD2	ERC1	ELKS/RAB6-interacting/CAST family member 1	190.77	228.24	330.86	510.8	558.32	599.15	391.25	501.46	434.01	1.28e-08	9.9e-20
Q8IV48	ERI1	exoribonuclease 1				57.08
O75477	ERLIN1	ER lipid raft associated 1		53.25		98.99	95.85	84.06				0.151	0.0031
O94905	ERLIN2	ER lipid raft associated 2	31.91	59.03		117.72	102.96	124.46				0.057	0.000152
Q9H501	ESF1	ESF1 nucleolar pre-rRNA processing protein homolog		27.94		48.88	50.7	53.56				0.00384	2.66e-05
A0FGR8	ESYT2	extended synaptotagmin-like protein 2		67.12	73.44	83.42	86.28	119.11	85.7	73.71	94.61	0.0144	2.34e-06
P62495	ETF1	eukaryotic translation termination factor 1		36.1		163.78	144.25	170.84	107.18	112.42	49.64	0.102	1.86e-09
Q01844	EWSR1	EWS RNA-binding protein 1		59.59	37.14	143.86	162.29	142.22	75.78	79.89	92.74	0.004	0.00289
Q96A65	EXOC4	exocyst complex component 4		33.94		123.65	260.11	101.27	102.77	73.3	80.42	0.00209	2.41e-10
Q13868	EXOSC2	exosome component 2			41.22	53.04	99.03	72.6				0.0367	1.87e-06
P15311	EZR	ezrin	87.84	200.65	78.63	338.37	432.68	358.59	204.49	250.14	282.1	1.62e-07	9.9e-20
Q9NZB2	FAM120A	family with sequence similarity 120A		30.55		136.4	273.29	245.75	137.04	48.02	95.7	0.000178	4.77e-15
Q641Q2	FAM21A/FAM21C	family with sequence similarity 21, member C				307.96	436.77	436.56	102.99	153.09	216.12	0.0188	1.42e-13
Q9H4H8	FAM83D	family with sequence similarity 83, member D				488.47	711.54	709.74	150.4	164.68	236.1	4.72e-05	9.9e-20
Q6ZRV2	FAM83H	family with sequence similarity 83, member H	88.21	196.3	190.99	432.01	432.31	547.24	298.57	360.63	352.88	2.27e-06	9.9e-20
Q658Y4	FAM91A1	family with sequence similarity 91, member A1				52.58	50.76	50.81				0.717	0.0131
Q9Y3D0	FAM96B	family with sequence similarity 96, member B				47.44	46.59	52.73			38.16
Q8NCA5	FAM98A	family with sequence similarity 98, member A	49	103.18	61.11	292.84	250.04	183.18	60.78	73.48	71.52	0.000694	1.65e-09
Q52LJ0	FAM98B	family with sequence similarity 98, member B		93.9	72.04	143.64	169.18	126.4	112.06	115.51	117.63	0.001	9.17e-12
Q9Y285	FARSA	phenylalanyl-tRNA synthetase, alpha subunit		22.27		157.26	114.16	131.09	121.42	99.86	152.55	0.00766	7.57e-08
Q7L8L6	FASTKD5	FAST kinase domains 5				38.62	56.16	29.94
P62861	FAU	Finkel-Biskis-Reilly murine sarcoma virus (FBR-MuSV) ubiquitously expressed	77.14	82.51	104.8	63.25	93.61	99.11	103.06	84.12	66.48	0.0329	1.18e-12
P22087	FBL	fibrillarin				113.91	167.08	154.58	108.79	130.11	137.23	0.000243	4.04e-13
P07332	FES	FES proto-oncogene, tyrosine kinase				35.82
Q96M96	FGD4	FYVE, RhoGEF and PH domain containing 4	36.55	45.85	54.09	52.51	21.91	61.05	115.84	113.16	104.95	0.000611	5.36e-10
Q13642	FHL1	four and a half LIM domains 1		42.96		53.06	20.51
Q00688	FKBP3	FK506 binding protein 3, 25kDa				46.3	43.32	67.2				0.0492	6.79e-05
Q9Y680	FKBP7	FK506 binding protein 7				40.71		43.6	37.55	52.84	33.42	0.0161	0.000308
Q13045	FLII	flightless I actin binding protein	25.96	26.84	68.04	447.24	423.66	585.14	280.65	227.43	217.74	9.07e-05	9.9e-20
P21333	FLNA	filamin A, alpha	1389.8	1827	1668.96	1944.52	2192.3	1925.7	1832.43	1772.24	1732.59	2.76e-09	9.9e-20
O75369	FLNB	filamin B, beta	564.96	826.07	807.98	679.86	738.29	767.47	505.06	561.13	521.43	6.23e-07	9.9e-20
Q14315	FLNC	filamin C, gamma	622.57	807.95	781.54	622.36	709.91	724.35	235.25	299.39	364.2	6.03e-09	9.9e-20
Q96PY5	FMNL2	formin-like 2	23.21	37.47	45.69	36.22						0.131	0.00953
Q5T0N5	FNBP1L	formin binding protein 1-like				80.05	98.4	88.17				0.0231	0.000412
Q14331	FRG1	FSHD region gene 1				45.98
Q8IY81	FTSJ3	FtsJ homolog 3 (E. coli)		40.42		141.7	166.58	97.61	69.99	63.07	58.01	0.062	4.66e-09
P35637	FUS	FUS RNA binding protein		34.05	28.45	44.63	45.47	43.67				0.0226	0.993
P51114	FXR1	fragile X mental retardation, autosomal homolog 1	91.48	81.32	66.04	281.88	407.23	340.38	258.72	228.87	266.75	5.54e-05	9.9e-20
P51116	FXR2	fragile X mental retardation, autosomal homolog 2	60.82	44.6	55.68	148.91	137.89	217.7	45.38	108.36	44.81	0.000718	4.04e-11
Q13283	G3BP1	GTPase activating protein (SH3 domain) binding protein 1	210.5	220.79	273.88	557	652.59	555.23	570.47	530.08	527.68	3.04e-05	9.9e-20
Q9UN86	G3BP2	GTPase activating protein (SH3 domain) binding protein 2	38.1	30.45	27.31	133.62	199.41	194.66	94.56	76.38	134.21	0.000345	9.9e-20
P04406	GAPDH	glyceraldehyde-3-phosphate dehydrogenase	103.95	233.33	253.63	213.81	176.74	168.93	293.73	363.77	232.72	0.424	1.68e-12
O75323	GBAS	glioblastoma amplified sequence	60.06	29.29		214.02	174.78	221	104.98	144.14	113.69	0.0194	3.67e-06
Q92616	GCN1	GCN1 eIF2 alpha kinase activator homolog	35.32	70.06	34.37	93.63	154.53	212.46	38.02	84.12	83.76	0.000413	6e-09
O14893	GEMIN2	gem (nuclear organelle) associated protein 2				39.13	41.93	42.35
P57678	GEMIN4	gem (nuclear organelle) associated protein 4	27.44	42.88	37.79	100.84	76.24	88.21	53.46	58.93	51.7	0.00809	0.00031
Q8TEQ6	GEMIN5	gem (nuclear organelle) associated protein 5		22.58		59.1	136.23	112.03	43.9	52.82	52.48	0.0843	0.000649
Q8WXD5	GEMIN6	gem (nuclear organelle) associated protein 6		22.37	38.14	35.99		50.69
Q06210	GFPT1	glutamine--fructose-6-phosphate transaminase 1	48.61	90.46	74.25	241.9	326.86	320.71	240.07	264.94	144.14	0.0256	1.41e-10
Q9NWU2	GID8	GID complex subunit 8				103.75	112.56	159.26		63.04		0.679	0.0556
Q6Y7W6	GIGYF2	GRB10 interacting GYF protein 2		60.79	41.44	220.61	133.39	254.47	118.31	94.04	147.5	0.000325	9.9e-20
O14908	GIPC1	GIPC PDZ domain containing family, member 1	163.95	174.87	145.18	238.16	202.83	239.81	165.52	144.84	130.82	0.00124	9.46e-08
Q9Y2X7	GIT1	G protein-coupled receptor kinase interacting ArfGAP 1	131.96	149.64	211.26	454.03	413.11	520.7	277.63	354.38	384.45	0.000793	9.9e-20
Q14161	GIT2	G protein-coupled receptor kinase interacting ArfGAP 2	35.16	49.86	35.27	168.31	185.81	109.43	119.79	138.94	60.89	0.00023	1.83e-14
Q9H4G4	GLIPR2	GLI pathogenesis-related 2	126.64	107.42	108.91	156.53	133.13	153.79	112.84	102.91	129.2	0.154	4.31e-05
P00367	GLUD1	glutamate dehydrogenase 1	350.49	375.98	336.68	742.76	920.78	1034.54	689.52	803.69	696.23	3.54e-05	9.9e-20
P63096	GNAI1	guanine nucleotide binding protein (G protein), alpha inhibiting activity polypeptide 1	671.13	745.94	758.95	648.84	713.68	733.35	847.26	733.12	906.23	0.0246	9.9e-20
P04899	GNAI2	guanine nucleotide binding protein (G protein), alpha inhibiting activity polypeptide 2	410.01	337.13	495.8	325.42	417.32	339.8	496.4	471.3	505.54	0.0745	9.9e-20
P08754	GNAI3	guanine nucleotide binding protein (G protein), alpha inhibiting activity polypeptide 3	277.94	420.66	453.57	334.98	398.4	325.25	422.85	355.14	429.63	0.0716	1.53e-13
P50148	GNAQ	guanine nucleotide binding protein (G protein), q polypeptide	41.85	113.52	46.69	55.87	50.97	37.99	57.99	99.09	52.65	0.129	7.05e-05
P63092	GNAS	GNAS complex locus	174.93	332.55	267.45	323.6	405.08	245.38	315.45	265.98	299.35	0.011	9.9e-20
P62879	GNB2	guanine nucleotide binding protein (G protein), beta polypeptide 2	141.79	184.76	109.87	300.35	264.51	244.64	183.92	156.24	140.12	0.00809	2.29e-06
P63244	GNB2L1	guanine nucleotide binding protein (G protein), beta polypeptide 2-like 1	145.9	159.97	141.66	220.56	245.11	251.64	140.96	174	131.62	0.0226	2.92e-10
Q9Y223	GNE	glucosamine (UDP-N-acetyl)-2-epimerase/N-acetylmannosamine kinase	120.65	150.21	161.16	176.57	243.79	214.01	142.93	143.35	174.82	0.00472	1.26e-11
P50151	GNG10	guanine nucleotide binding protein (G protein), gamma 10	31.85	42.25	40.73	44.12	21.07	58.62	74.9	68.67	67.25	0.0196	1.17e-12
Q9UBI6	GNG12	guanine nucleotide binding protein (G protein), gamma 12	92.69	38.34	55.27	130.18	40.08	142.83	152.58	112.61	159.32	0.02	1.72e-07
Q13823	GNL2	guanine nucleotide binding protein-like 2 (nucleolar)				54.11	26.18	49.3	22.73	38.88	65.07	0.00391	1.93e-07
P46926	GNPDA1	glucosamine-6-phosphate deaminase 1				304.91	275.58	371.65	53.27	60.23	104.35	0.0196	6.42e-11
Q8TDQ7	GNPDA2	glucosamine-6-phosphate deaminase 2				161.3	174.2	265	85.29	102.9	57.47	0.0346	2.23e-07
Q9HD26	GOPC	golgi-associated PDZ and coiled-coil motif containing	33.45	31.08	39.86	178.02	183.29	195.36	188.17	141.03	148.43	0.00115	2.09e-07
P35052	GPC1	glypican 1		55.55	72.54	38.66	40.36	103.55	54.21		42.02	0.347	8.03e-05
O75487	GPC4	glypican 4	73.11	191.15	109.43	164.96	111.81	140.54	142.3	119.69	132.44	0.0162	9.72e-05
Q8NFJ5	GPRC5A	G protein-coupled receptor, class C, group 5, member A	27.93		44.06	39.32	32.11	31.18	36.15	24.31	35.16
Q14451	GRB7	growth factor receptor-bound protein 7		21.48		88.83	147.9	83.37	87.99	75.24	50.57	0.0283	3.32e-07
Q12849	GRSF1	G-rich RNA sequence binding factor 1				56.2	55.79	55.77	34.3
P06396	GSN	gelsolin	150.55	269.2	229.94	375.82	448.83	436.86	411.8	443.78	448.28	0.000197	2.68e-13
P09211	GSTP1	glutathione S-transferase pi 1		39.93	26.71	41.57		46.25	52.95	67.57	54.26	0.331	0.134
Q92759	GTF2H4	general transcription factor IIH, polypeptide 4, 52kDa				39.71	44.94	42.55
P78347	GTF2I	general transcription factor IIi	75.96	86.19	113.94	123.21	223.36	161.1	115.66	175.39	177.42	8.97e-05	9.89e-11
Q9Y5Q9	GTF3C3	general transcription factor IIIC, polypeptide 3, 102kDa				39.42		58.32			28.53	0.348	0.0738
Q9UBP9	GULP1	GULP, engulfment adaptor PTB domain containing 1			29.24	87.21	81.88	65.54	83.84	98.03	84.08	0.00108	2.14e-06
P13807	GYS1	glycogen synthase 1 (muscle)				58.01		57.84	41.63	57.81
P07305	H1F0	H1 histone family, member 0	24.16			38.12	48.7
P16104	H2AFX	H2A histone family, member X	61.91	68.81	43.43	168.25	155.27	126.94	157.05	182.44	163.92	0.423	0.0406
P40939	HADHA	hydroxyacyl-CoA dehydrogenase/3-ketoacyl-CoA thiolase/enoyl-CoA hydratase (trifunctional protein), alpha subunit	217.92	280.14	231.05	172.47	312.43	208.27	102.79	212.46	150.83	0.00133	3.98e-09
Q68CZ6	HAUS3	HAUS augmin-like complex, subunit 3				50.76	64.95	32.51			31.48	0.0432	0.434
O94927	HAUS5	HAUS augmin-like complex, subunit 5			21.39	41.1	37	40.46			44.69
Q7Z4H7	HAUS6	HAUS augmin-like complex, subunit 6				116.07	119.9	63.19	80.74	110.32	88.36	0.000364	8.18e-05
Q99871	HAUS7	HAUS augmin-like complex, subunit 7				116.18	156.43	106.2				0.00169	0.0372
Q9BT25	HAUS8	HAUS augmin-like complex, subunit 8				56.68	46.8	58.91			63.25	0.0717	2.68e-05
Q13547	HDAC1	histone deacetylase 1				84.58	123.26	57.29	52.95	64.81	57.82	0.00949	0.000175
Q7Z4V5	HDGFRP2	hepatoma-derived growth factor-related protein 2	36.15	88.22	46.22	137.33	94.76	129.85	72.62	74.12	108.87	3.12e-05	9.9e-20
Q00341	HDLBP	high density lipoprotein binding protein	236.89	417.48	412.62	888.62	1319.43	850.75	516.59	541.5	638.37	2.42e-09	9.9e-20
Q9NRZ9	HELLS	helicase, lymphoid-specific				198.26	202.84	186.75	72.93	62.31	79.88	0.00446	8.36e-11
P42694	HELZ	helicase with zinc finger				47.32	70.1	112.64	56.58		28.96	0.128	0.0224
O95714	HERC2	HECT and RLD domain containing E3 ubiquitin protein ligase 2				51.84	25.34	34.52			44.63	0.0349	6.13e-07
O94992	HEXIM1	hexamethylene bis-acetamide inducible 1	22	48.13	34.95	188.75	270.54	219.57	35.76	45.32	51.27	0.000154	3.89e-15
P16401	HIST1H1B	histone cluster 1, H1b	53.42	61.93	53.11	63.91	56.71	62.73	74.64	46.72	38.91	0.00744	5.05e-08
P16402	HIST1H1D	histone cluster 1, H1d	149.22	172.35	150.42	181.17	273.77	218.06	222.22	251.71	278.29	0.000685	9.9e-20
P04908	HIST1H2AB	histone Cluster 1, H2ab	131	86.45	69.95	258.12	206.36	207.62	241.83	274.35	237.47	0.347	0.000474
P58876	HIST1H2BD	histone cluster 1, H2bd	455.52	371.63	367.74	261.18	140.08	202.22	287.91	255.25	221.45	0.0155	3.95e-07
P62805	HIST1H4A	histone Cluster 1, H4a	448.53	188.18	145.64	122.06	115.34	137.37	92.96	73.49	117.44	9.24e-05	1.12e-07
Q16777	HIST2H2AC	histone cluster 2, H2ac	241.99	118.62	106.63	169.54	247.97	307.46	290.58	193.79	180.94	0.0842	0.000131
Q8N257	HIST3H2BB	histone cluster 3, H2bb	421.47	310.62	318.14	216.6	85.88	152.74	211.68	150.08	173.93	0.315	0.0197
P19367	HK1	hexokinase 1	76.31	35.44	80.55	62.22	57.39	62.18	62.48	31.19	45.95	0.145	0.000743
Q2TB90	HKDC1	hexokinase domain containing 1	264.7	354.44	421.52	747.83	682.45	598.88	645.18	454.91	586.82	1.15e-08	9.9e-20
Q14527	HLTF	helicase-like transcription factor	36.87	24.56	141.39	172.96	209.09	150.54	169.63	103.01	117.83	0.049	7.46e-07
O75330	HMMR	hyaluronan-mediated motility receptor (RHAMM)				601.78	687.94	747.18	157.61	145.58	128.08	0.0023	9.9e-20
Q13151	HNRNPA0	heterogeneous nuclear ribonucleoprotein A0	107.92	185.29	120.94	317.05	348.35	352.75	206.6	294.71	302.78	0.00546	9.82e-12
P09651	HNRNPA1	heterogeneous nuclear ribonucleoprotein A1		67.93	44.97	156.02	164.03	107.39	102.27	225.61	122.18	0.00625	2.11e-08
P22626	HNRNPA2B1	heterogeneous nuclear ribonucleoprotein A2/B1	62.97	60.67	85.34	167.19	182.68	193	105.68	209.76	176.31	9.32e-05	3.08e-13
Q99729	HNRNPAB	heterogeneous nuclear ribonucleoprotein A/B		26.08		48.03	35.44	42.33
P07910	HNRNPC	heterogeneous nuclear ribonucleoprotein C (C1/C2)	57.56	81.94	62.16	162.26	166.77	118.79	177.85	201.61	174.58	0.192	7.92e-07
Q14103	HNRNPD	heterogeneous nuclear ribonucleoprotein D (AU-rich element RNA binding protein 1, 37kDa)	35.84	50.84	37.66	50.79		107.6				0.318	0.0133
P52597	HNRNPF	heterogeneous nuclear ribonucleoprotein F	46.51	62	114.49	237.43	186.64	212.38				0.0271	0.295
P31943	HNRNPH1	heterogeneous nuclear ribonucleoprotein H1 (H)	44.06	121.33	81.36	205.51	170.93		49.5			0.000237	0.000189
P55795	HNRNPH2	heterogeneous nuclear ribonucleoprotein H2 (H')	44.06	79.19	72.53	123.55	65.85					0.000673	0.00512
P31942	HNRNPH3	heterogeneous nuclear ribonucleoprotein H3 (2H9)		24.54		131.2	116.36	134.06	82.68	101.1	88.6
P61978	HNRNPK	heterogeneous nuclear ribonucleoprotein K	53.1	110.32	148.62	183.82	192.94	230.74	174.58	191.46	228.97	8.91e-05	9.9e-20
P14866	HNRNPL	heterogeneous nuclear ribonucleoprotein L	114.16	69.52		53.21	58.73	71.87	52.8	49.66	57.09	0.149	0.0173
Q8WVV9	HNRNPLL	heterogeneous nuclear ribonucleoprotein L-like				36.79		46.43
P52272	HNRNPM	heterogeneous nuclear ribonucleoprotein M	450.78	631.17	664.44	1404.42	1131.68	1379.4	1115.15	1108.92	1001.73	1.95e-06	9.9e-20
Q00839	HNRNPU	heterogeneous nuclear ribonucleoprotein U (scaffold attachment factor A)	271.4	377.98	339.05	595.31	750.61	744.11	668.06	794.79	732.53	8.65e-08	9.9e-20
Q9BUJ2	HNRNPUL1	heterogeneous nuclear ribonucleoprotein U-like 1	30.92	67.68	26.73	124.61	81.74	161.71	38.77	79.14	26.9	0.0333	1.02e-06
Q86VS8	HOOK3	hook microtubule-tethering protein 3				145.04	90.37	112.31				0.155	0.0944
P51659	HSD17B4	hydroxysteroid (17-beta) dehydrogenase 4	79.12	142.39	149.83	561.99	709.66	757.2	564.51	555.69	632.48	4.55e-05	9.9e-20
P07900	HSP90AA1	heat shock protein 90kDa alpha (cytosolic), class A member 1	857.28	1054.27	1214.63	687.65	599.32	742.23	555.9	573.18	604.9	0.00437	2.11e-15
P08238	HSP90AB1	heat shock protein 90kDa alpha (cytosolic), class B member 1	1087.32	1293.98	1419.61	807.83	983.21	1012.1	952.86	864.18	934.58	0.00509	9.9e-20
Q58FF6	HSP90AB4P	heat shock protein 90kDa alpha (cytosolic), class B member 4, pseudogene	107.46	116.9	119.51	40.83	76.91	122.43	61.64	56.1	66.98	0.169	0.00483
P14625	HSP90B1	heat shock protein 90kDa beta (Grp94), member 1	333.45	326.64	320.5	148.93	261.05	199.13	292.15	270.88	277.04	0.00166	4.55e-15
P08107	HSPA1A	heat Shock 70kDa Protein 1A	170.04	169.41	142.15	296.03	355.96	328.77	371.03	300.88	331.42	0.00154	6.09e-13
P34932	HSPA4	heat shock 70kDa protein 4		45.27		77.27	48.9	88.54	82.04	86.14		0.0603	0.000389
P11021	HSPA5	heat shock 70kDa protein 5 (glucose-regulated protein, 78kDa)	305.74	376.17	375.12	779.8	947.31	865.12	763.6	749.86	839.81	3.08e-05	9.9e-20
P11142	HSPA8	heat shock 70kDa protein 8	693.5	839.43	800.18	1248.15	1673.74	1521.44	1747.45	1623.87	1689.18	2.37e-07	9.9e-20
P38646	HSPA9	heat shock 70kDa protein 9 (mortalin)	292.86	582.27	552.82	850.18	813.97	999.39	877.12	763.98	779.99	1.73e-05	9.9e-20
P04792	HSPB1	heat shock 27kDa protein 1	569.22	655.88	749.5	1369.22	1327.09	1358.51	1295.8	1183.24	1242.28	3.08e-07	9.9e-20
P10809	HSPD1	heat shock 60kDa protein 1 (chaperonin)	94.55	106.59	82.98	95.71	56.19	147.06	271.43	311.29	287.24	0.0654	2.22e-16
P41252	IARS	isoleucyl-tRNA synthetase	306.44	292.61	330.97	329.87	348.53	198.6	186.9	179.02	225.32	0.0168	9.9e-20
Q9NSE4	IARS2	isoleucyl-tRNA synthetase 2, mitochondrial	76.89	127.86	126.83	139.52	191.3	187.03	61.06	60.9	82.1	0.000837	1.11e-16
Q9HBG6	IFT122	intraflagellar transport 122				53.25
Q9NZI8	IGF2BP1	insulin-like growth factor 2 mRNA binding protein 1	307.49	552.67	454.66	736.21	770.55	728.45	490.71	571.97	544.1	2.23e-08	9.9e-20
Q9Y6M1	IGF2BP2	insulin-like growth factor 2 mRNA binding protein 2	154.15	218.86	183.76	486.78	344.34	346.79	349.59	310.82	278.48	0.00378	9.9e-20
O00425	IGF2BP3	insulin-like growth factor 2 mRNA binding protein 3	165.12	325.79	211.12	827.12	712.09	752.4	505.42	530.99	561.13	0.00014	9.9e-20
O95163	IKBKAP	inhibitor of kappa light polypeptide gene enhancer in B-cells, kinase complex-associated protein	103.31	156.61	169.29	492.54	468.33	540.97	116.59	130.14	129.11	0.0548	5e-15
Q12906	ILF3	interleukin enhancer binding factor 3, 90kDa	105.03	213.8	81.23	121.11	148.74	117.11	53.24	65.45	49.84	0.0324	1.04e-06
Q13418	ILK	integrin-linked kinase	56.15	57.81	38.92	154.49	156.98	136.79	146.3	129.18	172.58	0.0332	9.88e-13
Q16891	IMMT	inner membrane protein, mitochondrial	25.82	66.49	60.14	134.83	82.78	141.11	124.26	100.69	89.16	0.0018	9.86e-12
P20839	IMPDH1	IMP (inosine 5'-monophosphate) dehydrogenase 1	248.91	236.32	296.94	415.23	502.76	429.45	249.54	253.08	306.05	0.000718	1.06e-12
P12268	IMPDH2	IMP (inosine 5'-monophosphate) dehydrogenase 2	829.88	1101.11	970.22	1307	1495.76	1509.2	1449.84	1480.93	1470.09	3.42e-08	9.9e-20
Q14642	INPP5A	inositol polyphosphate-5-phosphatase A				55.14	70.37	44.73	63.52	49.43	53.48	0.0189	8.09e-10
O95373	IPO7	importin 7		25.98	37.39	58.65	43.06					0.0251	0.0165
Q96P70	IPO9	importin 9	43.52	27.95	57.87	124.94	82.19	92.22	107.15	130.77	101.85	0.936	0.215
P46940	IQGAP1	IQ motif containing GTPase activating protein 1	917.16	1134.52	1090.17	1327.24	1602.25	1558.81	1271.79	1322.03	1197.72	1.66e-06	9.9e-20
Q7Z5L9	IRF2BP2	interferon regulatory factor 2 binding protein 2				44.62	67.62	43.69
Q9NPH2	ISYNA1	inositol-3-phosphate synthase 1				39.53	22.49	37.17	37.6
Q14573	ITPR3	inositol 1,4,5-trisphosphate receptor, type 3			24.86	44.8	82.16	75.63	42.24	24.08	43.61	0.0813	0.0245
P14923	JUP	junction plakoglobin	97.2	136.06	132.38	84.31	112.9		178.26	85.64	182.05	0.18	0.000418
Q63ZY3	KANK2	KN motif and ankyrin repeat domains 2	284.72	257.53	336.24	235.38	377.75	315.78	359.68	388.97	348.37	2.6e-06	9.9e-20
O60341	KDM1A	lysine (K)-specific demethylase 1A		50.74	24.95	36.2	72.55	49.73			61.92	0.631	0.000407
Q07666	KHDRBS1	KH domain containing, RNA binding, signal transduction associated 1		0		86.96	74.4	84.27	34.81	32.72	34.55	0.216	0.00142
Q12768	KIAA0196	KIAA0196				132.41	187.51	106.55	87.36	82.7	88.8	0.00959	1.5e-10
Q2M389	KIAA1033	KIAA1033				338.24	244.56	252.61	39.94	146.1	71.84	0.00778	2.3e-11
Q96Q89	KIF20B	kinesin family member 20B		0		193.37	163.82	202.82	221.23	236.96	194.58	0.000757	9.9e-20
Q02241	KIF23	kinesin family member 23	102.48	146.67	125.26	217.58	258.74	214.92	248.77	201.39	244.77	2.17e-05	2.16e-11
O00139	KIF2A	kinesin heavy chain member 2A	142.93	188.68	140.64	534.59	658.5	650.47	321.36	291.24	259.09	5.88e-07	9.9e-20
Q99661	KIF2C	kinesin family member 2C	35.59		29.02	38.21	75.33	50.93	24.18		79.79	0.0395	7.92e-08
O95239	KIF4A	kinesin family member 4A	36.95	84.48	71.3	394.52	374.9	458.54	183.97	245.12	187.71	1.12e-06	9.9e-20
Q9BW19	KIFC1	kinesin family member C1			0	92.3	147.95	116.79	28.45			0.00347	0.000119
Q9BVG8	KIFC3	kinesin family member C3	32.01		89.27	145.3	115.68	137.91	36.91	43.94	58.45	0.00379	3.71e-09
Q1ED39	KNOP1	lysine-rich nucleolar protein 1				54.17	31.42	34.78			22.24	0.0915	5.59e-05
P50748	KNTC1	kinetochore associated 1				45.53	69.08
P52294	KPNA1	karyopherin alpha 1 (importin alpha 5)				51.27	87.45	32.36
P52292	KPNA2	karyopherin alpha 2 (RAG cohort 1, importin alpha 1)	73.17	133.45	91.03	396.09	416.06	354.9	151.31	201.38	188.66	0.0877	2.64e-07
O15131	KPNA5	karyopherin alpha 5 (importin alpha 6)				35.68	100.38	57.73				0.983	0.999
P04264	KRT1	keratin 1, type II	1942.89	2427.85	2326.66	889.34	995.91	1116.22	964.65	844.33	821.6	0.0208	1.45e-13
P13645	KRT10	keratin 10, type I	1047.05	1428.34	1294.38	502.25	544.94	639.86	132.31	154.71	230.45	0.214	4.22e-11
P02533	KRT14	keratin 14, type I	309.92	382.81	441.69	50.03	132.42	56.87	101.11	71.04	69.58	0.546	0.00177
P08779	KRT16	keratin 16, type I	327.36	413.43	445.51	125.76	127.88	129.31	101.11	76.13	74.23	0.135	8.64e-09
P35908	KRT2	keratin 2, type II	918.64	1373.99	1147.79	399.42	492.48	517.54	331.68	433.17	272.6	0.0617	2.97e-12
P13647	KRT5	keratin 5, type II	295.36	397.87	298.36	144.61	198.06	158.11	72.05	124.79	118.11	0.311	3.62e-06
P02538	KRT6A	keratin 6A, type II	298.57	423.25	386.49	126.4	176.46	107.56	147.48	121.41	94.35	0.544	0.00346
P04259	KRT6B	keratin 6B, type II	300.43	369.55	296.66	119.2	188.75	156.61	91.93	167.84	106.06	0.27	0.000642
Q01546	KRT76	keratin 76, type II	108.86	96.25	84.3	47.14	46.23	41.66		42.85	41.4	0.0464	0.0284
P35527	KRT9	keratin 9, type I	1478.36	2198.14	2017.71	658.29	816.33	657.12	647.32	794.38	664.78	0.0054	7.13e-05
Q86UP2	KTN1	kinectin 1 (kinesin receptor)				170.44	160.06	174.83	47.75	73.59	38.64	0.000674	3.09e-10
O00515	LAD1	ladinin 1	174.98	273.7	314.48	240.57	349.21	295.91	515.18	511.63	462.14	1.12e-07	9.9e-20
P11047	LAMC1	laminin, gamma 1 (formerly LAMB2)		31.12		51.76	107.5	46.67		44.09		0.0687	3.63e-05
P28838	LAP3	leucine aminopeptidase 3		33.98	36.62	36.94	85.35	94.56	86.85	38.34	110.14	0.00641	4.49e-09
Q6PKG0	LARP1	La ribonucleoprotein domain family, member 1	102.32	207.71	191.96	538.45	691.8	590.94	530.6	496.22	477.27	8.96e-07	9.9e-20
Q71RC2	LARP4	La ribonucleoprotein domain family, member 4				42.44	37.34	32.05	20.56	30.96		0.0264	0.000164
Q92615	LARP4B	La ribonucleoprotein domain family, member 4B				44.97	44.37	36.01	30.41		70.16
Q4G0J3	LARP7	La ribonucleoprotein domain family, member 7				40.56	37.34	57.48			42.48	0.000586	3.33e-16
Q9P2J5	LARS	leucyl-tRNA synthetase	108.86	161.8	111.31	190.31	331.13	291.12	87.32	146.98	62.45	0.0403	9.9e-20
Q15031	LARS2	leucyl-tRNA synthetase 2, mitochondrial		33.36	44.91	63.12		34.1	62.1	49.77	56.42	0.0317	1.44e-05
Q14847	LASP1	LIM and SH3 protein 1	201.54	224.54	240.59	423.38	520.15	462.98	404.93	463.12	419.38	6.25e-07	9.9e-20
P00338	LDHA	lactate dehydrogenase A	112.14	103.07	190.29	84.45	78.41	73.9	77.24	69.23	80.27	0.0659	0.733
P07195	LDHB	lactate dehydrogenase B	137.77	197.79	84.35	62.51	79.55	62.11	89.13	97.67	72.57	0.446	0.00286
P09382	LGALS1	lectin, galactoside-binding, soluble, 1	110.17	158.56	153.09	102	91.69	69.26	42.56	68.22	47.35	0.279	0.00341
Q9UPQ0	LIMCH1	LIM and calponin homology domains 1	94.11	109.86	124.42	138.35	168.12	140.79	254.26	144.86	197	0.000586	9.9e-20
P48059	LIMS1	LIM and senescent cell antigen-like domains 1				63.42	49.56
Q9H9Z2	LIN28A	lin-28 homolog A (C. elegans)				46.2	42.2	41.67	30.05
Q9BRT6	LLPH	LLP homolog, long-term synaptic facilitation (Aplysia)				42.56		43.5
P02545	LMNA	lamin A/C	789.72	1108.13	891.65	1390.82	1507.29	1511.1	1218.29	1246.73	1102.95	9.9e-20	9.9e-20
O43272	LOC102724788/PRODH	proline dehydrogenase (oxidase) 1	37.88	47.83	61.75	180.15	130.71	165.21	103.92	110.95	83.79	0.246	5.59e-08
P36776	LONP1	lon peptidase 1, mitochondrial		64.42	35.12	155.78	91.67	114.82	66.26	80.67	63.3	0.414	6.2e-06
Q93052	LPP	LIM domain containing preferred translocation partner in lipoma	33	82.64	67.16	253	262.49	257.23	166.53	197.74	144.36	0.00527	9.09e-07
Q96II8	LRCH3	leucine-rich repeats and calponin homology (CH) domain containing 3	66.22	45.58	82	123.34	40.62	87.47	79.93	47.84	48.37	0.427	9.29e-10
O75427	LRCH4	leucine-rich repeats and calponin homology (CH) domain containing 4	54	131.87	137.87	230.67	265.68	257.48	313.75	365.96	306.82	0.00783	3.4e-12
P30533	LRPAP1	low density lipoprotein receptor-related protein associated protein 1	24.98			53.4	162.11	129.51	31.02	77.51	28.25	0.00288	2.68e-12
Q8N1G4	LRRC47	leucine rich repeat containing 47		49.25	39.85	41.08		82.66	89.67	76.6	77.91	0.00422	2.13e-12
Q96AG4	LRRC59	leucine rich repeat containing 59	52.73	76.48	99.58	243.31	259.6	258.04	203.06	178.94	203.19	0.0498	2.15e-06
Q32MZ4	LRRFIP1	leucine rich repeat (in FLII) interacting protein 1				433.7	403.16	541.16	219.27	210.34	214.47	3.49e-06	9.9e-20
Q9Y608	LRRFIP2	leucine rich repeat (in FLII) interacting protein 2		66.97	71.4	122.8	139.36	142.12	90.6	52.81	55.85	0.0212	1.12e-05
Q3MHD2	LSM12	LSM12 homolog		28.29	29.18	50.52	37	35.81	26	38.19	45.27	0.0195	1.4e-10
Q9NQ29	LUC7L	LUC7-like	51.07	101.34	120.79	203.57	225.05	192.67	90.09	85.88	86.14	0.000234	7.77e-06
Q9Y383	LUC7L2	LUC7-like 2 pre-mRNA splicing factor	162.38	273.86	247.15	328.76	396.32	350.3	209.31	248.04	288.43	3.21e-05	9.16e-08
Q86V48	LUZP1	leucine zipper protein 1				83.74	202.66	38.71	146.83	161.99	96.42	1.31e-05	2.58e-14
Q9NX58	LYAR	Ly1 antibody reactive				60.6	54.86	55.62	54.6			0.651	0.0517
P07948	LYN	LYN proto-oncogene, Src family tyrosine kinase	98.83	155.23	148.28	94.65	159.51	127.99	271.26	135.14	264.52	0.0357	9.9e-20
Q7L5Y9	MAEA	macrophage erythroblast attacher				54.25		57.02	34.63	46.27
Q9Y5V3	MAGED1	melanoma antigen family D1				37.01	23.16	30.57	42.83		25.6	0.214	0.000841
Q9UNF1	MAGED2	melanoma antigen family D2				96.43	106.35	85.75	83.79	44.27	72.57	0.000128	1.54e-12
Q9H0U3	MAGT1	magnesium transporter 1	33.54			39.58	43.06	43.04
Q66K74	MAP1S	microtubule-associated protein 1S				62.24	56.64	80.43				0.387	0.0162
P27816	MAP4	microtubule-associated protein 4	66.79	87.89	111.33	285	199.98	145.81	195.05	195.79	191.53	0.00136	2.73e-06
O95819	MAP4K4	mitogen-activated protein kinase kinase kinase kinase 4	78.04	88.18	88.89	231.36	181.71	200.52	191.55	145.51	152.29	0.00141	8.72e-11
Q3KQU3	MAP7D1	MAP7 domain containing 1				40.48	38.86	38.91		24.85
Q15555	MAPRE2	microtubule-associated protein, RP/EB family, member 2				47.05	44.28	50.16	60.75	32.68	52.64
Q7KZI7	MARK2	MAP/microtubule affinity-regulating kinase 2	36.9	23.9	22.61	208.64	190.47	143.85	39.96	72.94	80.89	0.000796	2.95e-08
P27448	MARK3	MAP/microtubule affinity-regulating kinase 3	36.9			120.25	106.54	75.36	25.75	61.93		0.0152	8.24e-07
P56192	MARS	methionyl-tRNA synthetase	170.6	119.91	118.45	400.96	473.28	467.88	192.41	182.73	236.13	0.0013	9.9e-20
O60307	MAST3	microtubule associated serine/threonine kinase 3	29.03	43.24	26.11	37.34	22.4		21.84
P31153	MAT2A	methionine adenosyltransferase II, alpha	63.11	108.04	92.05	95.06	38.81	20.63	92.81	73.88	104.2	0.0324	0.000141
P43243	MATR3	matrin 3	35.96		40.24	51.76	178.15	139.74	77.31	71.11	74.6	0.042	2.59e-07
Q96RQ3	MCCC1	methylcrotonoyl-CoA carboxylase 1 (alpha)	48.07	113.29	97.82	60.57	55.15	84.96	53.8	72.99	72.4	0.00486	2.07e-06
Q9HCC0	MCCC2	methylcrotonoyl-CoA carboxylase 2 (beta)	161.03	198.17	172.62	218.42	218.49	103.38	200.07	179.47	224.93	0.0392	6.8e-11
P25205	MCM3	minichromosome maintenance complex component 3	82.04	130.64	130.22	512.94	599.84	493.69	431.1	387.22	251.81	7.26e-05	9.9e-20
P33991	MCM4	minichromosome maintenance complex component 4		52.13	61.52	78.94		133.31	65.91	47.05	59.05	0.122	7.07e-07
P33992	MCM5	minichromosome maintenance complex component 5	275.48	308.71	332.71	723.13	901.71	872.09	415.09	498.7	485.07	3.46e-05	9.9e-20
Q14566	MCM6	minichromosome maintenance complex component 6	26.93	42.61	30.45	39.77	90.84		20.19			0.0114	9.43e-06
P33993	MCM7	minichromosome maintenance complex component 7	130.18	167.93	165.02	185.3	218.8	274.09	160.99	173.97	139.67	0.00142	1.11e-16
Q14680	MELK	maternal embryonic leucine zipper kinase				57.21	47.56	81.26	62.29	34.74		0.472	0.46
Q9Y316	MEMO1	mediator of cell motility 1				50.19	50.55	74.72	29.27
Q8N6R0	METTL13	methyltransferase like 13				49.67	25.12	87.94		36.56	25.92	0.0128	1.32e-05
Q7RTP6	MICAL3	microtubule associated monooxygenase, calponin and LIM domain containing 3	91.13	102.5	209.55	205.44	218.48	190.94	295.8	264.53	275.55	8.73e-05	1.92e-11
Q8IUF8	MINA	MYC induced nuclear antigen				54.26	34.02	29.69		54.02	38.28
Q8N4C8	MINK1	misshapen-like kinase 1	78.04	75.26	67.69	237.65	203.38	198.88	224.77	166.23	170.01	0.00633	1.09e-12
Q9NXC5	MIOS	missing oocyte, meiosis regulator, homolog (Drosophila)		57.9	67	96.82	74.86	79.19	40.56	46.53	50.07	0.0109	3.03e-07
P55196	MLLT4	myeloid/lymphoid or mixed-lineage leukemia; translocated to, 4				60.14	68.84	85.61	39.72	47.76		0.0128	0.000329
Q13724	MOGS	mannosyl-oligosaccharide glucosidase				176.86	81.22	81.62	50.85	48.59	54.14	0.0294	4.15e-07
Q9Y6X9	MORC2	MORC family CW-type zinc finger 2				35.9	69.93	27.54				0.016	9.74e-05
Q9HCE1	MOV10	Mov10 RISC complex RNA helicase	57.19	75.63	73.36	157.63	154.99	230.16		22.01		0.00828	0.000146
Q6UVY6	MOXD1	monooxygenase, DBH-like 1	30.98	39.62		41.95	42.04	41.94		37.67		0.142	7.97e-05
Q6WCQ1	MPRIP	myosin phosphatase Rho interacting protein	370.04	669.04	517.69	983.96	895.25	796.08	652	717.48	774.73	6.53e-08	9.9e-20
Q9BV20	MRI1	methylthioribose-1-phosphate isomerase 1	61.75	104.63	136.13	127.92	135.78	172.13	47.81	52.58	30.5	0.205	0.000381
Q9Y2R9	MRPS7	mitochondrial ribosomal protein S7				41.23	24.89	36.38	25.84	22.33	35.75	0.0185	0.00102
Q9UKD2	MRTO4	MRT4 homolog, ribosome maturation factor	41.37	62.57	59.78	112.74	121.72	135.51	69.06	67.68	98.62	0.000416	2.26e-10
P26038	MSN	moesin	31.38	92.62	43.23	268.03	231.74	248.3	74.17	137.73	131.04	1.48e-07	2.15e-13
Q9Y4B5	MTCL1	microtubule crosslinking factor 1				37.49	118.8	93.45				0.0812	7.29e-05
Q86UE4	MTDH	metadherin	160.75	243.11	246.72	489.23	463.58	692.55	411.21	469.32	462.79	7.07e-07	9.9e-20
P11586	MTHFD1	methylenetetrahydrofolate dehydrogenase (NADP+ dependent) 1, methenyltetrahydrofolate cyclohydrolase, formyltetrahydrofolate synthetase	155.13	108.12	88.81	123.95	174.55	103.68	88.51	50.63	41.38	0.00673	3.29e-08
P13995	MTHFD2	methylenetetrahydrofolate dehydrogenase (NADP+ dependent) 2, methenyltetrahydrofolate cyclohydrolase		48.78		111.25	70.23	95.18	111.18	99.78	149.57	0.028	0.000282
Q9NXD2	MTMR10	myotubularin related protein 10		26.52	33.22	63.5	65.6	28.67				0.0169	2.77e-05
Q14764	MVP	major vault protein	292.79	300.68	350.06	1494.13	1617.89	1344.11	1339.75	1283.15	1290.01	7.15e-10	9.9e-20
Q9BQG0	MYBBP1A	MYB binding protein (P160) 1a				153.68	108.6	118.71	29.9			0.0298	0.00185
O75592	MYCBP2	MYC binding protein 2, E3 ubiquitin protein ligase				115.93	105.19	97.41	23.64		22.54	0.00485	0.0161
P35580	MYH10	myosin, heavy chain 10, non-muscle	2136.33	2750.25	3004.52	3072.36	3551.07	3240.49	2244.68	2230.09	2181.24	9.9e-20	9.9e-20
P35749	MYH11	myosin, heavy chain 11, smooth muscle	414.96	307.23	270.11	223.76	364.49	410.57	281.23	242.61	258.48	9.66e-05	5.12e-10
Q7Z406	MYH14	myosin, heavy chain 14, non-muscle	387.4	600.43	430.6	450.31	820.76	704.69	487.14	449	406.62	6.07e-07	9.9e-20
P35579	MYH9	myosin, heavy chain 9, non-muscle	2063.11	2579.85	2484.77	2903.91	3971.95	3512.35	2871.4	2762.89	2753.5	9.9e-20	9.9e-20
P19105	MYL12A	myosin, light chain 12A, regulatory, non-sarcomeric	274.47	347.01	328.67	275.55	385.6	347.05	157.97	191.86	159.28	0.0225	2.1e-06
O14950	MYL12B	myosin, light chain 12B, regulatory	274.47	362.19	324.38	311.08	407.47	379.33	157.97	191.86	159.28	0.0285	3.48e-06
P60660	MYL6	myosin, light chain 6, alkali, smooth muscle and non-muscle	390.36	370.11	361.5	618.91	692.09	593.38	609.25	652.05	490.6	0.00035	6.08e-10
P14649	MYL6B	myosin, light chain 6B, alkali, smooth muscle and non-muscle	117.11	60.74	97.54	95.87	115.67	94.57	103.26	109.9	75.5
P24844	MYL9	myosin, light chain 9, regulatory	103.34	154.7	193.59	162.92	200.01	187.04	64.26	68.39	77.53	0.0038	1.32e-09
Q92614	MYO18A	myosin XVIIIA	982.52	1253.62	1265.54	1562.23	1942.87	1629.17	1301.41	1384.75	1514.81	1.67e-15	9.9e-20
Q96H55	MYO19	myosin XIX				41.18
O00159	MYO1C	myosin IC	1452.06	1999.84	2061.26	2055.74	2283.68	2422.19	2771.66	2953.78	3271.29	1.53e-09	9.9e-20
Q12965	MYO1E	myosin IE	128.25	194.11	244.67	238.84	403.67	306.3	348	375	288.79	3.19e-06	9.9e-20
Q9Y4I1	MYO5A	myosin VA	21.76	82.78	70.65	95.67	194.92	176.91	233.69	174.32	212.67	0.0138	1.39e-10
Q9ULV0	MYO5B	myosin VB		84.34	66.2	89.46	87.45	60.1	151.13	65.95	104.8	0.00441	2.28e-11
Q9NQX4	MYO5C	myosin VC	25.14	134.81	141.59	148.55	236.2	61.16	74.33	85.65	93.63	0.000529	3.49e-14
Q9UM54	MYO6	myosin VI	779.48	944.21	994.4	816.51	1034.17	961.43	1084.52	1064.17	957.61	9.54e-11	9.9e-20
Q13459	MYO9B	myosin IXB	173.83	184.83	177.56	423.78	492.98	470.71	536.26	434.5	390.28	4.54e-06	9.9e-20
Q9NZM1	MYOF	myoferlin		118.5	80.49	349.43	528.93	394.93	122.91	62.97	67.16	4.9e-05	9.9e-20
Q6NZ67	MZT2B	mitotic spindle organizing protein 2B		35.01	40.08	106.51	215.62	170.54	46.69	61.37	77.27	0.865	0.128
Q13765	NACA	nascent polypeptide-associated complex alpha subunit	20.83	83.04	60.67	92.86	129.73	151.76	35.26	21.93		0.155	0.791
P43490	NAMPT	nicotinamide phosphoribosyltransferase	269.31	341.05	390.53	646.55	720.45	616.79	565.08	551.54	485.43	0.000297	3.75e-09
Q99733	NAP1L4	nucleosome assembly protein 1-like 4		35.63		45.58	39.77		22.44	20.35	27.51
O43776	NARS	asparaginyl-tRNA synthetase	61.63	125.19	82.9	327.1	348.57	368.49	242.44	176.18	171.74	0.00114	9.9e-20
Q15021	NCAPD2	non-SMC condensin I complex, subunit D2				157.8	265.51	172.17	27.39	43.79	42.92	0.00517	8.04e-10
P42695	NCAPD3	non-SMC condensin II complex, subunit D3				128.78	146.27	149.07	118.42	69.95	120.43	5.2e-05	1.31e-14
Q9BPX3	NCAPG	non-SMC condensin I complex, subunit G				117.64	122.01	166.62				0.0154	5.25e-09
Q86XI2	NCAPG2	non-SMC condensin II complex, subunit G2	32.23			82.95	99.44	61.56				0.153	0.00303
Q15003	NCAPH	non-SMC condensin I complex, subunit H				50.86	111.4	99.6	66.36	41.9	41.11	0.0106	2.36e-07
Q9Y2A7	NCKAP1	NCK-associated protein 1	81.11	149.77	126.89	341.24	249.31	254.04	135.31	70.18	68.66	0.00139	5.13e-14
P19338	NCL	nucleolin	446.47	475.05	506.75	1151.7	1496.83	1162.77	583.98	671.55	581.04	1.22e-08	9.9e-20
Q969V3	NCLN	nicalin				51.72	75.19	54.66	59.04	43.8		0.00368	6.73e-08
O75489	NDUFS3	NADH dehydrogenase (ubiquinone) Fe-S protein 3, 30kDa (NADH-coenzyme Q reductase)				78.69	40.33	78.29				0.33	6.05e-05
P18615	NELFE	negative elongation factor complex member E	73.93	104.21	101.2	329.97	263.78	333.57	181.52	191.6	171.38	0.000308	5.28e-13
O60524	NEMF	nuclear export mediator factor	22.36			89.75	106.76	94.73				6.72e-05	5.92e-11
P21359	NF1	neurofibromin 1				77.93	34.17			35.11	39.21	0.0474	0.254
Q9BYG3	NIFK	nucleolar protein interacting with the FHA domain of MKI67	41.86			155.06	165.52	188.76	122.91	108.85	58.97	0.203	0.000481
Q9BPW8	NIPSNAP1	nipsnap homolog 1 (C. elegans)	70.03	87.84	89.28	207.36	81.34	120.98	148.09	122.37	99.5	0.394	2.38e-05
Q96D46	NMD3	NMD3 ribosome export adaptor		21.45	21.09	58.44	68.37	54.47	32.09		50.84
Q9Y5B8	NME7	NME/NM23 family member 7				36.87
P30419	NMT1	N-myristoyltransferase 1	54.83	63.79	60.66	88.9	158.1	120.72	121.43	103.81	80.22	0.0523	4.1e-10
Q8NC60	NOA1	nitric oxide associated 1				50.13		23.12
Q9ULX3	NOB1	NIN1/RPN12 binding protein 1 homolog			21.41	40.84	102.21	84.03		43.89		0.0457	8.81e-08
Q15233	NONO	non-POU domain containing, octamer-binding	77.58	184.68	141.26	569.95	577.73	611.95	455.49	515.35	487.4	4.79e-06	9.9e-20
P78316	NOP14	NOP14 nucleolar protein				61.08	48.67	49.5		38.67	31.3
P46087	NOP2	NOP2 nucleolar protein	40.47	78.06	112.56	202.74	195.73	196.71	87.49	89.78	156.58	0.000567	4.06e-12
O00567	NOP56	NOP56 ribonucleoprotein		71.99	71.05	77.26	47.17	75.57	44.96	55.06	103.91	0.0104	5.8e-09
Q9Y2X3	NOP58	NOP58 ribonucleoprotein	32.21	57.54	99.43	175.43	322.38	196.88	79.31	82.99	173.47	0.0166	5.67e-06
P06748	NPM1	nucleophosmin (nucleolar phosphoprotein B23, numatrin)	65.91	250.05	73.72	214.23	239.19	355.17	424.86	331.78	261.03	0.00181	1.65e-11
Q96P11	NSUN5	NOP2/Sun domain family, member 5	20.25	26.52	44.46	83.37	93.51	111.22	56.92	56.05	62.16	0.0293	0.000256
Q7Z417	NUFIP2	nuclear fragile X mental retardation protein interacting protein 2	83.59	87.66	107.16	289.55	387.28	357.81	211.96	216.14	193.05	6.48e-05	9.9e-20
Q14980	NUMA1	nuclear mitotic apparatus protein 1				208.79	283.13	243.52	119.57	80.3	44.84	0.00037	1.28e-08
Q9Y6R0	NUMBL	numb homolog (Drosophila)-like	33.45		0	96.81	186.73	118.92	68.85	48.23	56.36	0.000256	7.87e-10
P57740	NUP107	nucleoporin 107kDa				35.52	43.88
Q92621	NUP205	nucleoporin 205kDa		50.96	23.21	40.59	37.74	50.26		27.57	40.44
Q9UBU9	NXF1	nuclear RNA export factor 1		43.53	33.14	83.62	124.67	119.67		55.19	57.58	0.0936	0.000408
O60313	OPA1	optic atrophy 1 (autosomal dominant)				37.96	92.43	84.15	116.55	118.02	121.98	0.0843	4.12e-09
O60890	OPHN1	oligophrenin 1		75.09	72.61	64.53	37.02	40.81			22.36	0.0794	0.000158
O43929	ORC4	origin recognition complex, subunit 4				58.81		61.76
Q9BZF1	OSBPL8	oxysterol binding protein-like 8			39.16	92.5	67.9	92.09	33.85	35.51	44.73	0.00929	6.73e-05
O15460	P4HA2	prolyl 4-hydroxylase, alpha polypeptide II				40.97	56.8		171.1	91.73	147.87	0.0144	2.75e-07
P07237	P4HB	prolyl 4-hydroxylase, beta polypeptide	87.51	132.35	126.78	205.45	210.27	149.27				0.288	0.0362
Q9UQ80	PA2G4	proliferation-associated 2G4, 38kDa	93.44	170.74	109.66	598.42	528.27	379.46	295.95	292.8	345.68	6.28e-06	9.9e-20
P11940	PABPC1	poly(A) binding protein, cytoplasmic 1	226.94	387.66	264.2	651.28	763.3	716.91	145.04	177.71	130.21	1.74e-05	7.68e-12
Q13310	PABPC4	poly(A) binding protein, cytoplasmic 4 (inducible form)	163.72	319.6	212.51	529.42	547.93	477.35	142.95	124.68	110.83	3.05e-05	7.15e-08
Q9UNF0	PACSIN2	protein kinase C and casein kinase substrate in neurons 2	36.89	67.91	114.99	340.33	281.77	334.19	209.47	208.49	255.97	2.76e-07	9.9e-20
Q9UKS6	PACSIN3	protein kinase C and casein kinase substrate in neurons 3	79.74	127.03	128.68	207.03	186.59	202.96	128	138.93	138.39	0.00546	3.27e-10
O96013	PAK4	p21 protein (Cdc42/Rac)-activated kinase 4				47.42
Q9NVE7	PANK4	pantothenate kinase 4			28.54	37.24	26.32	56.48	39.65	50.59	61.57	0.00761	1.36e-06
O43252	PAPSS1	3'-phosphoadenosine 5'-phosphosulfate synthase 1				54.9	51.12	49.73	46.79	39.75	28.83	0.406	0.00417
O95340	PAPSS2	3'-phosphoadenosine 5'-phosphosulfate synthase 2				47.75	121.04	43.7	36.46		45.04	0.00115	7.53e-05
Q8TEW0	PARD3	par-3 family cell polarity regulator		43.95	46.67	84.74	57.36	133.91	61.05	53.95	53.75	0.00291	8.77e-07
Q9BYG5	PARD6B	par-6 family cell polarity regulator beta	26.75		25.28	93.52	116.05	108.94	76.16	116.77	107.09	0.0109	3.93e-09
P09874	PARP1	poly (ADP-ribose) polymerase 1	174.85	419.78	346.93	1072.52	1079.82	914.95	659.32	659.16	690.3	7.89e-07	9.9e-20
Q9UGN5	PARP2	poly (ADP-ribose) polymerase 2				57.89	31.14	52.32	38.45			0.446	0.000505
Q9UKK3	PARP4	poly (ADP-ribose) polymerase family, member 4				152.38	241.27	246.91	56.36	101.29	61.08	0.000716	1.11e-16
Q7L3T8	PARS2	prolyl-tRNA synthetase 2, mitochondrial (putative)				39.28		59.36		58.85
Q86TB9	PATL1	protein associated with topoisomerase II homolog 1 (yeast)	52.33			131.41	141.64	69.3				0.0412	1.09e-05
Q96IZ0	PAWR	PRKC, apoptosis, WT1, regulator	31.45	127.18	107.68	195.56	160.54	114.93	236.72	257.47	312.17	0.00106	2.49e-14
Q96AQ6	PBXIP1	pre-B-cell leukemia homeobox interacting protein 1		45.83	36.63	47.08	46.47	76.36	80.07	66.63	72.2	0.0432	6.45e-05
Q15365	PCBP1	poly(rC) binding protein 1		35.78	28.86	92.41	70.24	84.55	50.71	38.91	65.34	0.41	7.52e-06
Q15366	PCBP2	poly(rC) binding protein 2		29.08	29.71	100.93	94.96	94.03	50.71	38.91	65.34	0.0862	7.35e-05
Q5JVF3	PCID2	PCI domain containing 2				52.62	67.18	62.87				0.0287	0.000251
Q16822	PCK2	phosphoenolpyruvate carboxykinase 2 (mitochondrial)	63.18	78.95	64.39	35.72	37.02	45.14	57.38		22.96	0.182	0.000142
Q15154	PCM1	pericentriolar material 1	47.88	80.14	28.89	374.8	419.72	286.8	158.78	158.34	181.99	0.000125	9.9e-20
P12004	PCNA	proliferating cell nuclear antigen	112.49	154.75	143.48	99.13	99.5	105.71	156.26	136.94	144.87	0.0112	1.92e-08
Q13442	PDAP1	PDGFA associated protein 1				78.15	109.09	97.27		30.27	22.86	0.00504	1.05e-07
Q5VU43	PDE4DIP	phosphodiesterase 4D interacting protein		0		43.89				0
O00151	PDLIM1	PDZ and LIM domain 1	100.63	161.83	136.05	215	199.49	308.96	336.27	296.4	300.75	0.0796	2.51e-14
Q96HC4	PDLIM5	PDZ and LIM domain 5	24.43	51.51	43.24	159.78	211.38	235.79	171.75	87.65	145.94	2.75e-05	9.9e-20
Q9NUG6	PDRG1	p53 and DNA-damage regulated 1				48.09		32.51				0.148	3.59e-06
Q29RF7	PDS5A	PDS5 cohesin associated factor A				80.56	176.02	117.98		27.45	31.98	0.00121	0.000426
Q9NTI5	PDS5B	PDS5 cohesin associated factor B				132.85	179.39	112.55	39.89	26.49	63.94	0.00204	3.21e-08
Q86TG7	PEG10	paternally expressed 10				62.74	118.7	118.15		29.05	61.08	0.0145	4.98e-05
Q9BRX2	PELO	pelota homolog (Drosophila)		30.05		143.92	192.85	115.63	115.22	76.24	58.94	0.00242	1.59e-06
P50542	PEX5	peroxisomal biogenesis factor 5				419.77	447.28	429.14	352.27	251.15	241.64	0.0515	9.9e-20
Q9UHV9	PFDN2	prefoldin subunit 2			21.37	51.4		77.85
P17858	PFKL	phosphofructokinase, liver	102.05	163.36	225.41	677.74	447.76	700.75	355.45	408.82	402.84	0.00208	9.9e-20
P08237	PFKM	phosphofructokinase, muscle	92.72	154.64	209.44	553.25	599.44	650.12	231.71	366.28	333.02	7.32e-06	9.9e-20
Q01813	PFKP	phosphofructokinase, platelet	82.96	135.27	85.7	336.71	337.76	383.11	207.77	224.16	158.26	0.00111	9.9e-20
Q8IWS0	PHF6	PHD finger protein 6	31.57	22.88	34.3	35.48		32.67		29.91		0.0076	4.73e-10
O43175	PHGDH	phosphoglycerate dehydrogenase	396.07	437.8	431.44	402.78	603.44	567.87	641.91	600.65	472.52	0.00779	1.47e-10
Q86UU1	PHLDB1	pleckstrin homology-like domain, family B, member 1	130.47	228.28	212.46	371.32	276.39	423.81	369.81	369.23	412.1	1.09e-10	9.9e-20
Q969N2	PIGT	phosphatidylinositol glycan anchor biosynthesis, class T				48.44
Q9NWS0	PIH1D1	PIH1 domain containing 1				116.28	142.72	130.56	52.39	72.36	51.08	0.0212	2.29e-05
Q99755	PIP5K1A	phosphatidylinositol-4-phosphate 5-kinase, type I, alpha		38.22	33.25	43	134.19	108.94	129.63	95.36	95.3	1.47e-05	9.69e-11
Q9Y446	PKP3	plakophilin 3				37.28	38.49	73.34	61.6	112.8	101.58	0.0383	3.36e-06
Q8IV08	PLD3	phospholipase D family, member 3			25	42.75	26.7		38.95	22.46	38.46
Q15149	PLEC	plectin	147.88	260.85	322.33	272.97	448.52	386.01	352.39	297.8	358.3	1.16e-09	9.9e-20
Q8IVE3	PLEKHH2	pleckstrin homology domain containing, family H (with MyTH4 domain) member 2				59.43	86.26	66.59
Q02809	PLOD1	procollagen-lysine, 2-oxoglutarate 5-dioxygenase 1	217.9	284.09	291.41	578.36	634.89	606.73	757.76	666.19	754.56	0.000181	9.9e-20
O60568	PLOD3	procollagen-lysine, 2-oxoglutarate 5-dioxygenase 3	51.47	75.1	62.98	128.63	108.31	172.41	43.14	57.9	86.04	0.0174	8.06e-12
P13797	PLS3	plastin 3	49.61	29.64	39.07	53.02	51.96	45.01	34.6	35.9	51.37	0.456	4.12e-10
Q9NRX1	PNO1	partner of NOB1 homolog	20.79			42	51.16		30.53			0.677	0.393
Q8IY17	PNPLA6	patatin-like phospholipase domain containing 6		26.74	32.79	168.74	224.54	232.5	121.32	108.07	83.3	0.0199	2.42e-08
Q8TCS8	PNPT1	polyribonucleotide nucleotidyltransferase 1		25.56	34.6	157.88	148.4	226.93	72.76	60.47	92.19	0.00923	1.91e-14
P28340	POLD1	polymerase (DNA directed), delta 1, catalytic subunit				48.66	64.91	104				0.0426	0.000605
P24928	POLR2A	polymerase (RNA) II (DNA directed) polypeptide A, 220kDa			24.61	196.57	236.06	155.32	168.19	166.3	102.43	0.000565	6.03e-14
P30876	POLR2B	polymerase (RNA) II (DNA directed) polypeptide B, 140kDa	32.93	78.26	42.42	227.81	222.19	190.76	163.44	147.67	133.05	2.02e-06	9.9e-20
P36954	POLR2I	polymerase (RNA) II (DNA directed) polypeptide I, 14.5kDa				55.81	57.18
Q9GZM3	POLR2J2/POLR2J3	polymerase (RNA) II (DNA directed) polypeptide J3				78.4	68.79			61.65	94.84
O14802	POLR3A	polymerase (RNA) III (DNA directed) polypeptide A, 155kDa				60.16
Q99575	POP1	POP1 homolog, ribonuclease P/MRP subunit		27.38		216.77	232.09	213.28	113.09	83.02	92.45	0.000138	2.78e-15
P0CG38	POTEI	POTE ankyrin domain family, member I	652.2	766.1	723.7	809.75	876.91	846.99	926.45	791.73	814.67	5.7e-07	9.9e-20
Q9NQ55	PPAN	peter pan homolog (Drosophila)				80.26		97.59	62.18	40.76	71.46
Q13136	PPFIA1	protein tyrosine phosphatase, receptor type, f polypeptide (PTPRF), interacting protein (liprin), alpha 1			22.22	131.05	214.22	164.56	100.69	108.66	78.31	5.36e-05	4.85e-10
Q86W92	PPFIBP1	PTPRF interacting protein, binding protein 1 (liprin beta 1)	137.21	223.46	255.61	632.49	528	551.8	407.77	442.49	417.44	2.43e-05	9.9e-20
Q8ND30	PPFIBP2	PTPRF interacting protein, binding protein 2 (liprin beta 2)		45.07	41.06	220.82	318.98	145.07	161.39	192.53	141.3	0.00642	7.49e-11
Q13356	PPIL2	peptidylprolyl isomerase (cyclophilin)-like 2				57.13	40.81	71.65			27.18
O60437	PPL	periplakin		22.86	40.5	362.14	245.83	296.03	329.71	300.67	234.52	2.13e-08	9.9e-20
P62136	PPP1CA	protein phosphatase 1, catalytic subunit, alpha isozyme	46.92	58.95	68.57	185.55	258.55	195.79	105.96	109.98	81.54	0.139	6.9e-07
P62140	PPP1CB	protein phosphatase 1, catalytic subunit, beta isozyme	51.93	129.97	147.52	200.8	278.97	238.72	141.05	141.07	102.51	0.0217	3.75e-12
P36873	PPP1CC	protein phosphatase 1, catalytic subunit, gamma isozyme		49.23	80.13	172.81	259.04	171.45	101.44	102.94	67.61	0.121	1.47e-07
O14974	PPP1R12A	protein phosphatase 1, regulatory subunit 12A	669.95	968	863.96	1275.81	1475.21	1816.02	1780.56	1769.69	1848.14	9.9e-20	9.9e-20
Q9BZL4	PPP1R12C	protein phosphatase 1, regulatory subunit 12C	26.74	171.63	186.92	591.37	661.2	658.59	399.01	399.74	442.49	1.14e-11	9.9e-20
Q6NYC8	PPP1R18	protein phosphatase 1, regulatory subunit 18	49.9	64.46	110.99	112.31	103.51	75.84	145.27	169.58	130.35	0.0065	3.11e-14
P62714	PPP2CB	protein phosphatase 2, catalytic subunit, beta isozyme	43.06			59.48	67.35	58.97	38.27	57.3	49.92	0.0239	0.000299
Q06830	PRDX1	peroxiredoxin 1	88.02	54.34	80.65	58.76	43.4	92.81	115.72	115.52	92.25	0.0376	1.16e-09
Q9Y478	PRKAB1	protein kinase, AMP-activated, beta 1 non-catalytic subunit				50.46	40.39	23.82
P54619	PRKAG1	protein kinase, AMP-activated, gamma 1 non-catalytic subunit		48.72		119.11	150.59	168.64				0.00745	0.00023
P13861	PRKAR2A	protein kinase, cAMP-dependent, regulatory, type II, alpha	24.72	61.72	58.39	134.81	187.12	114.04	61.4	35.75	31.27	0.00793	5.49e-11
Q05655	PRKCD	protein kinase C, delta	80.78	79.9	110.01	35.85	41.49		70.09	94.57		0.0739	0.00678
Q9BZL6	PRKD2	protein kinase D2		29.62	35.57	39.42	57.12	31.81	61.21	76.08	91.84	0.000155	5.67e-11
O94806	PRKD3	protein kinase D3		120.5	50.53	91.72	98.25	150.48	55.13	110.85	80.13	0.00749	2.33e-08
P78527	PRKDC	protein kinase, DNA-activated, catalytic polypeptide	493.3	557.68	616.78	1418.41	1445.19	1306.91	700.54	745.28	654.08	8.45e-10	9.9e-20
O14744	PRMT5	protein arginine methyltransferase 5		28.18	44.87	79.85	89.07	63.52	75.43	54.4	42.75	0.0212	9.4e-07
O94906	PRPF6	pre-mRNA processing factor 6		43.78	48.61	47.76	100.4	123.01	47.32	51.31	53.47	0.00286	4.72e-10
Q6P2Q9	PRPF8	pre-mRNA processing factor 8	56.48	55.24	34.44	264.01	372.99	214.44	44.65	32.85	52.21	0.000901	1.7e-11
P60891	PRPS1	phosphoribosyl pyrophosphate synthetase 1		26.58	46.74	142.08	122.09	63.37	143.8	149.56	149.94	0.0753	1.55e-06
P11908	PRPS2	phosphoribosyl pyrophosphate synthetase 2		26.58	46.74	142.08	122.09	63.37	143.1	149.56	161.11	0.329	1.27e-07
P48634	PRRC2A	proline-rich coiled-coil 2A				61.38	76.42	69.73				0.0486	6.03e-09
P35998	PSMC2	proteasome 26S subunit, ATPase 2	37.91	95.6	41.15	87.37	98.87	117.34	88.84	107.25	112.17	0.00886	0.00011
P62195	PSMC5	proteasome 26S subunit, ATPase 5		43.3	73.11	110.58	146.86	104.5	54.06		26.67	0.014	0.000407
Q13200	PSMD2	proteasome 26S subunit, non-ATPase 2	55.61	79.89	86.17	88.03	69.07	87.45	118.63	73.86	71.33	0.22	0.0434
Q8WXF1	PSPC1	paraspeckle component 1	34.85	82.44	49.38	91.17	129.31	96.01	49.21	54.4	42.47	0.00685	0.00608
P26599	PTBP1	polypyrimidine tract binding protein 1	209.24	173.61	350.05	786.17	1046.33	855.92	153.39	165.89	150.92	0.0544	0.000168
Q15678	PTPN14	protein tyrosine phosphatase, non-receptor type 14				54.09	35.11	44.73	32.62	32.39	38.05	0.783	0.46
Q6NZI2	PTRF	polymerase I and transcript release factor	53.11	79.99	74.08	318.71	320.8	341.92	76.16	108	81.13	0.000388	1.31e-10
Q15397	PUM3	pumilio RNA-binding family member 3				43.18
Q13610	PWP1	PWP1 homolog, endonuclein		54.94	44.31	129.39	179.59	98.85	108.54		49.8	1.82e-07	2.6e-11
P49023	PXN	paxillin			32.67	82.46	183.24	60.61	48.6	59.28	64.24	0.147	0.000116
P32322	PYCR1	pyrroline-5-carboxylate reductase 1	161.38	191.52	275.39	687.05	749.05	717.61	332.3	376.64	428.73	7.33e-08	9.9e-20
Q96C36	PYCR2	pyrroline-5-carboxylate reductase family, member 2	56.31	104.44	114.51	447.23	566.99	444.89	193.39	250.08	282.26	0.0021	3.59e-14
P47897	QARS	glutaminyl-tRNA synthetase	68.43	86.93	76.35	158.43	256.04	160.01	71.8	146.41	109.8	0.0012	1.49e-11
P61026	RAB10	RAB10, member RAS oncogene family	58.69	60.27	66.47	83.92	85.51	89.1	96.08	118.22	103.19	0.187	0.00158
Q9BXF6	RAB11FIP5	RAB11 family interacting protein 5 (class I)				48.44					27.56
P51153	RAB13	RAB13, member RAS oncogene family	36.06		42.56	63.93	61.45	63.9	74.36	64.34	49.38	0.304	0.222
Q15286	RAB35	RAB35, member RAS oncogene family	59.6	36.32	66.58	104.78	119.67	129.25	126.47	127.77	118.93	0.0981	0.00328
Q9H0H5	RACGAP1	Rac GTPase activating protein 1		67.74	36.09	84.59	62.47	134.39	54.52	128.47	122.18	0.217	4.12e-06
O60216	RAD21	RAD21 cohesin complex component				48.22	57.87	46.29			50.56	0.408	0.292
Q92878	RAD50	RAD50 homolog, double strand break repair protein		26.38		57.95	99.72	143.91	41.65	49.38	29.02	0.0389	0.00362
P04049	RAF1	Raf-1 proto-oncogene, serine/threonine kinase				79.12	73.87	57.11	21.56		52.41	0.211	6.03e-05
Q9P0K7	RAI14	retinoic acid induced 14	1054.74	1456.62	1345.63	2407.98	2892.11	2592.29	2100.29	2296.97	2249.76	9.9e-20	9.9e-20
P11233	RALA	v-ral simian leukemia viral oncogene homolog A (ras related)	118.31	113.49	98.77	198.22	161.14	169.92	251.38	296.95	222.41	0.00324	5.97e-11
Q15311	RALBP1	ralA binding protein 1				53.82	97.26	48.59		24.16	36.63	0.0907	0.00533
Q6GYQ0	RALGAPA1	Ral GTPase activating protein, alpha subunit 1 (catalytic)				136.06	117.39	117.93		40.91		0.0107	7.23e-05
Q2PPJ7	RALGAPA2	Ral GTPase activating protein, alpha subunit 2 (catalytic)				36.45	48.53					0.0102	3.48e-05
Q86X10	RALGAPB	Ral GTPase activating protein, beta subunit (non-catalytic)				136.49	276.89	206.62	45.89	30.47	54.78	0.000893	4.47e-13
Q9UKM9	RALY	RALY heterogeneous nuclear ribonucleoprotein				39.51	26.88	29.49		24.67	20.28	0.147	0.0547
P62826	RAN	RAN, member RAS oncogene family	85.18	89.14	71.87	120.85	101.94	102.26	59.09	20.64	22.9	0.00577	5.53e-08
Q6VN20	RANBP10	RAN binding protein 10				52.31	105.13	93.97	80.39	76.6	81.57	0.472	1.27e-05
P61224	RAP1B	RAP1B, member of RAS oncogene family	33.3	59.36	60.6	49.32	62.89		47.45	63.31	75.64	0.0801	0.026
P54136	RARS	arginyl-tRNA synthetase	165.32	156.08	153.53	314.55	248.58	321.07	287.36	244.19	260.87	0.0272	1.18e-12
Q96PK6	RBM14	RNA binding motif protein 14	20.94	55.3	69.54	169.39	174.28	229.14	197.25	249.93	248.83	0.000491	6.04e-12
Q9NW64	RBM22	RNA binding motif protein 22				47.62	35.04	38.71			32.39
Q9P2N5	RBM27	RNA binding motif protein 27				45.78	46.69					0.0431	1.42e-05
Q9NW13	RBM28	RNA binding motif protein 28	23.66	50.16	51.34	215.64	258.67	293.13	191.58	163.33	191.54	0.00201	1.67e-11
P98179	RBM3	RNA binding motif (RNP1, RRM) protein 3	51.55	85.58	89.72	151.07	75.41	126.17	45.14	75.9	137.88	0.0365	7.72e-08
Q14498	RBM39	RNA binding motif protein 39		73.71	64.45	191.26	127.34	167.45	70.4		57.67	0.00559	2.69e-07
Q9BWF3	RBM4	RNA binding motif protein 4				59.1	74.07	72.73	46.06	38.19	63.94
Q9Y580	RBM7	RNA binding motif protein 7				55.16	95.38		83.58		69.36
Q15434	RBMS2	RNA binding motif, single stranded interacting protein 2				46.02	47.86	62.92	37.72		32.82	0.143	0.135
P38159	RBMX	RNA binding motif protein, X-linked	28.11	79.17	62.94	148.01	128.02	149.01	113.94	120.01	73.14	0.0106	1.47e-07
Q93062	RBPMS	RNA binding protein with multiple splicing				59.26	97.25	80.21
P18754	RCC1	regulator of chromosome condensation 1			35.87	86.61	73.56	80.48
Q9P258	RCC2	regulator of chromosome condensation 2	88.84	191.93	173.73	395.29	452.29	348.68	230.75	206.99	200.93	2.01e-05	9.9e-20
Q15293	RCN1	reticulocalbin 1, EF-hand calcium binding domain	120.6	119.69	97.69	382.57	502.43	556.84	313.53	290.88	336.1	4.49e-06	9.9e-20
Q14257	RCN2	reticulocalbin 2, EF-hand calcium binding domain				216.16	92.75	46.32	56.89	36.27	52.22	0.435	0.0131
P35241	RDX	radixin	31.38	92.62	44.4	172.49	131.64	146.91	72.63	89.96	68.12	0.0155	1.56e-05
P46063	RECQL	RecQ helicase-like		62.64	53.9	95.51	118.85	142.64			43.34	0.00504	4.53e-09
Q9BWE0	REPIN1	replication initiator 1		52.09	24.34	79.61	163.62	94.61	104.56	96.5	106.47
Q96D71	REPS1	RALBP1 associated Eps domain containing 1	36.78			118.01	181.46	135.73	52.67		63.33	0.018	2.68e-08
P35251	RFC1	replication factor C (activator 1) 1, 145kDa	41.92	35.18		250.38	294.31	218.06	63.14	121.31	108.79	0.0139	7.69e-10
P35250	RFC2	replication factor C (activator 1) 2, 40kDa	51.45	72.11	44.04	98.94	94.53	100.54	31.39	31.82	66.74	0.00293	0.000155
P40938	RFC3	replication factor C (activator 1) 3, 38kDa				50.58	120.15	91.28	25.04		20.09	0.00108	2.99e-08
P35249	RFC4	replication factor C (activator 1) 4, 37kDa		28.07	28.46	86.3	81.27	106.34	29.57	45.5	61.83	0.0524	7.06e-05
P40937	RFC5	replication factor C (activator 1) 5, 36.5kDa	32.88			117.57	231.17	224	96.45	88.16	63.4	0.137	6.62e-08
Q14699	RFTN1	raftlin, lipid raft linker 1	70.75	73.49	78.02	139.75	136.44	93.44	107.87	85.68	68.77	0.0316	1.92e-06
Q9NPQ8	RIC8A	RIC8 guanine nucleotide exchange factor A	48.64			35.71	34.58	60.09			29.59	0.00682	0.0257
Q06587	RING1	ring finger protein 1				61.63		36.7
Q9BRS2	RIOK1	RIO kinase 1	36.38	66.67	41.74	174.28	217.8	218.35	126.72	159.64	114.56	4.76e-05	1.32e-14
Q9BVS4	RIOK2	RIO kinase 2				49.03	31.81	52.49
O43353	RIPK2	receptor-interacting serine-threonine kinase 2		65.52	66.11	111.13	121.03	61.72	52.27	112.08	47.89	0.321	4.71e-10
Q9H871	RMND5A	required for meiotic nuclear division 5 homolog A				47.9	52.53	37.33	28.03	33.43	40.71
O15541	RNF113A	ring finger protein 113A				56.9	37.88	47.91	56.88	57.13	51.05
Q5VTR2	RNF20	ring finger protein 20, E3 ubiquitin protein ligase		43.67	21.84	145.46	162.85	110.08	119.83	64.26	66.88	0.00529	1.87e-06
Q63HN8	RNF213	ring finger protein 213				93.85	205.14	97.17				0.00225	1.11e-06
O75150	RNF40	ring finger protein 40, E3 ubiquitin protein ligase				37.35	43.64	36.1	32.37	65.07		0.0499	0.00445
Q15287	RNPS1	RNA binding protein S1, serine-rich domain				52.69	57.71	52.92	29.78		24.04	0.248	0.00282
Q13464	ROCK1	Rho-associated, coiled-coil containing protein kinase 1	58.98		61.9	61.48	66.16	81.49	61.53	61.42	61.78	0.0873	4.55e-05
O75116	ROCK2	Rho-associated, coiled-coil containing protein kinase 2	224.03	246.31	371.47	596.12	714.66	524.07	663.73	765.36	847.71	1.3e-07	9.9e-20
P27694	RPA1	replication protein A1, 70kDa	20.09	65.72	36.63	36.07	33.6	31.1			21.47	0.0713	0.0208
Q9H6T3	RPAP3	RNA polymerase II associated protein 3	41.89	106.92	84.46	301.38	308.87	297.61	179.9	156.54	208.58	3.1e-05	9.9e-20
P27635	RPL10	ribosomal protein L10	188.97	287.34	235.62	447.46	474.81	438.66	504.75	381.19	444.03	0.00157	9.9e-20
P62906	RPL10A	ribosomal protein L10a	176.45	347.23	221.01	397.94	490.72	448.91	421.17	513.25	431.32	0.00329	9.9e-20
P62913	RPL11	ribosomal protein L11	190.98	231.53	177.77	459.23	397.41	491.63	467.55	434.12	379.66	0.0049	2.22e-16
P30050	RPL12	ribosomal protein L12	194.13	135.44	142.6	374.69	502.68	521.04	343.87	333.06	356.85	0.00142	9.9e-20
P26373	RPL13	ribosomal protein L13	334.1	324.47	321.79	629.73	599.61	703	525.83	551.24	653.36	3.37e-06	9.9e-20
P40429	RPL13A	ribosomal protein L13a	127.78	170.22	176.2	304.48	308.19	345.64	313.39	312.53	293.13	9.07e-07	9.9e-20
P50914	RPL14	ribosomal protein L14	211.99	210.54	213.03	261.75	336.79	301.55	223.35	228.94	221.85	0.00462	7.75e-13
P61313	RPL15	ribosomal protein L15	216.26	143.38	180.57	317.88	363.89	398.89	301.85	336.9	425.16	0.00198	9.9e-20
P18621	RPL17	ribosomal protein L17	173.91	244.61	211.67	470.25	689.9	550.37	310.94	275.77	277.9	9.36e-06	4.02e-13
Q07020	RPL18	ribosomal protein L18	242.15	373.15	369.02	561.34	605.1	557.87	501.53	501.29	559.49	0.00203	9.9e-20
P84098	RPL19	ribosomal protein L19	178.39	272.7	323.56	481.15	544.51	532.29	544.55	514.62	548.71	1.63e-05	9.9e-20
P46778	RPL21	ribosomal protein L21	68.68	109.26	90.54	227.16	255.01	294.38	333.84	245.33	291.94	0.000164	9.9e-20
P35268	RPL22	ribosomal protein L22	118.41	115.87	111.74	210	234.77	192.95	146.51	187.67	197.75	0.000521	1.8e-06
Q6P5R6	RPL22L1	ribosomal protein L22-like 1	103.07	113.43	115.13	397.18	408.7	340.78	418.81	449.19	415.99	0.00703	3.53e-13
P62829	RPL23	ribosomal protein L23	127.47	107.7	141.71	129.62	192.52	195.65	120.45	144.51	78.04	0.304	5.59e-07
P62750	RPL23A	ribosomal protein L23a	235.76	326.03	340.83	546.32	807.45	633.26	494.88	494.39	441	0.000158	9.9e-20
P83731	RPL24	ribosomal protein L24	208.41	251.36	175.48	239.61	354.22	295.25	468.43	454.76	437.27	0.0222	9.9e-20
P61254	RPL26	ribosomal protein L26	109.38	130.37	171.87	203.84	244.91	238.19	217.22	172.24	300.71	1.63e-05	9.9e-20
Q9UNX3	RPL26L1	ribosomal protein L26-like 1	109.38	130.37	163.16	180.9	226.56	230.18	210.37	164.66	273.86	2.7e-06	9.9e-20
P61353	RPL27	ribosomal protein L27	163.53	133.15	144.73	265.24	281.04	323.7	179.84	270.16	203.88	2.17e-07	9.9e-20
P46776	RPL27A	ribosomal protein L27a	115.74	126.33	149.19	203.77	267.78	162.16	257.1	250.76	302.57	0.00168	7.66e-12
P46779	RPL28	ribosomal protein L28	96.9	132.69	122.14	390.79	436.61	400.6	466.87	344.33	371.78	0.000121	9.9e-20
P47914	RPL29	ribosomal protein L29	94.61	123.25	114.45	198.93	155.27	213.75	235.62	219.7	248.65	0.000176	9.99e-16
P39023	RPL3	ribosomal protein L3	340.17	407.82	402.86	945.73	892.18	1043.9	888.05	933.78	912.56	8.19e-07	9.9e-20
P62888	RPL30	ribosomal protein L30	130.32	175.68	193.4	214.99	212.63	206.25	160.09	210.62	198.96	0.00231	2.23e-10
P62899	RPL31	ribosomal protein L31	61.81	43.22	69.58	80.87	118.9	105.13	49.88	90.53	69.07	1.35e-06	8e-10
P62910	RPL32	ribosomal protein L32	43.08	58.72	65.38	180.93	267.65	234.89	135.79	118.04	136.99	0.000528	9.9e-20
P49207	RPL34	ribosomal protein L34	119.13	137.19	144.79	110.74	143.05	121.4	184.52	176.65	157.71	0.00128	4.76e-08
P42766	RPL35	ribosomal protein L35	96.36	98.03	102.65	245.35	217.84	222.06	262.47	258.25	183.21	0.00029	2.12e-13
P18077	RPL35A	ribosomal protein L35a	89.82	100.96	95.41	89.78	179.35	154.2	88.18	66.88	32.52	0.000214	7.81e-10
Q9Y3U8	RPL36	ribosomal protein L36	166.87	175.27	134.28	233.84	179.25	255.34	183.41	209.83	201.61	0.0103	2.58e-12
P83881	RPL36A	ribosomal protein L36a			39.9	110.42	87.91	65.87	83.04	93.87	79.5
Q969Q0	RPL36AL	ribosomal protein L36a-like			43.24	85.95	75.33	76.82	82.32	41.26	48.38	0.0156	0.00684
P61513	RPL37A	ribosomal protein L37a	106.66	181.88	196.08	496.13	618.83	589.55	462.02	413.85	388.04	0.125	4.69e-13
P63173	RPL38	ribosomal protein L38	108.03	95.73	121.66	233.63	312.01	306.16	231.93	255.46	203.06	0.00283	9.9e-20
P36578	RPL4	ribosomal protein L4	324.61	385.11	333.3	630.96	634.58	640.99	598.95	679.64	766.05	2.77e-06	9.9e-20
P46777	RPL5	ribosomal protein L5	129.75	131.95	127.16	671.91	684.39	706.65	518.34	524.32	348.61	9.07e-10	9.9e-20
Q02878	RPL6	ribosomal protein L6	439.33	508.54	527.27	691.9	802.65	742.57	745.56	777.5	700.96	7.81e-12	9.9e-20
P18124	RPL7	ribosomal protein L7	301.69	339	256.53	458.74	411.68	448.99	544.77	441.9	414.23	8.32e-10	9.9e-20
P62424	RPL7A	ribosomal protein L7a	385.12	408.22	384.25	695.78	716	792.36	566.04	462.26	514.97	7.96e-06	9.9e-20
Q6DKI1	RPL7L1	ribosomal protein L7-like 1				98.48	73.85	94.29			23.42	0.387	8.59e-06
P62917	RPL8	ribosomal protein L8	97.54	138.51	124.56	381.6	428.08	437.16	310.28	425.23	376.93	7.51e-09	9.9e-20
P32969	RPL9	ribosomal protein L9	146.39	234.35	320.48	447.29	366.32	449.59	621.9	626.57	607.89	0.177	7.54e-12
P05388	RPLP0	ribosomal protein, large, P0	238.63	269.53	288.47	334.78	441.53	364.86	334.53	487.14	378.66	0.115	1.76e-10
P05386	RPLP1	ribosomal protein, large, P1	117.11	116.08	118.74	120.47	115.89	81.67	67.03	77.87	108.86	0.278	0.233
P05387	RPLP2	ribosomal protein, large, P2	239.97	239	146.8	425.18	475.6	450.09	194.2	233.5	297.55	0.00783	0.00231
P04843	RPN1	ribophorin I	24.42	39.9	27.38	91.17	59.39	117.74	89.57	89.83	77.42	0.0829	5.76e-08
P04844	RPN2	ribophorin II				205.6	216.08	139.78	75.9	67.12	128.94	0.543	2.42e-05
P46783	RPS10	ribosomal protein S10	204.17	253.63	213.66	301.74	342.92	319.43	391.51	458.04	443.86	5.43e-05	4e-15
P62280	RPS11	ribosomal protein S11	174.27	167.88	199.57	207.45	230.52	247.87	272.04	248.05	253.59	7.01e-06	9.9e-20
P62277	RPS13	ribosomal protein S13	244.8	313.63	322.98	391.25	527.11	385.46	501.33	432.32	487.66	0.000473	9.9e-20
P62263	RPS14	ribosomal protein S14	303.73	382.94	284.61	454.8	435.39	476.78	537.83	635.65	605.19	0.000311	9.9e-20
P62841	RPS15	ribosomal protein S15	230.48	446.87	335.39	377.61	392.03	421.97	593.29	571.4	528.4	0.205	1.16e-06
P62244	RPS15A	ribosomal protein S15a	330.37	342.7	292.65	500.61	517.82	484.84	489.18	438.73	464.55	0.00864	9.9e-20
P62249	RPS16	ribosomal protein S16	152.23	176.54	162.31	123.5	409.47	217.95	231.05	321.13	241.71	0.0017	9.9e-20
P0CW22	RPS17	ribosomal protein S17	123.8	169.58	200.46	249.55	256.59	259.91	264.59	293.33	220.46	0.978	0.51
P62269	RPS18	ribosomal protein S18	427.43	458.78	407.24	409.52	490.39	380.9	523.1	541.88	529.48	4.69e-06	9.9e-20
P39019	RPS19	ribosomal protein S19	277.69	396.75	363.12	383.95	517.53	355.97	507.8	563.42	539.75	0.00123	9.9e-20
P15880	RPS2	ribosomal protein S2	277.18	269.82	315.21	413.56	396.27	414.86	378.92	463.41	485.21	0.00505	1.11e-15
P60866	RPS20	ribosomal protein S20	46.82	71.56	85.98	91.05	152.62	142.81	84.52	70.58	67.33	0.00254	5.1e-09
P63220	RPS21	ribosomal protein S21				92.95	57.64	86.84	90.25	100.07	47.01	0.00301	5e-10
P62266	RPS23	ribosomal protein S23	116.29	103.85	117.16	137.7	150.94	182.74	156.36	168.82	129.42	0.0136	5.78e-07
P62847	RPS24	ribosomal protein S24	79.1	173.19	142.71	122.34	101.58	132.07	113.55	161.51	204.03	0.0336	9.5e-13
P62851	RPS25	ribosomal protein S25	288.68	305.2	290.51	347.77	293.34	369.38	340.51	274.62	267.88	0.000743	2.22e-16
P62854	RPS26	ribosomal protein S26	48.19	62.56	46.39	122.96	135.45	121.79	141.36	136.14	72.41	0.0511	0.00994
P42677	RPS27	ribosomal protein S27	146.31	95.72	187.66	163.83	174.25	163.61	82.66	104.75	81.65	0.00158	1.92e-10
P62979	RPS27A	ribosomal protein S27a		58.73		52.91	41.63	53.76	56.54	43.03	61.48
P62857	RPS28	ribosomal protein S28	86.5	76.67	49.76	137.59	101.17	130.95	87.68	72.77	99.01	0.0589	5.12e-12
P62273	RPS29	ribosomal protein S29		28.06	20.52	55.72	71.74	61.24	60.33	37.33	57.03	0.0371	4.31e-05
P23396	RPS3	ribosomal protein S3	495.07	537.09	491.15	893.83	1077.92	930.16	1014.28	1133.8	1179.44	6.85e-05	9.9e-20
P61247	RPS3A	ribosomal protein S3A	344.96	384.02	353.81	555.86	456.48	449.75	496.92	603.51	508.3	5.49e-07	9.9e-20
P62701	RPS4X	ribosomal protein S4, X-linked	253.59	379.7	375.47	672.34	634.42	476.44	417.63	456.85	523.83	4.18e-08	9.9e-20
P46782	RPS5	ribosomal protein S5	138.55	110.91	166.16	278.25	326.5	171.49	279.19	290.92	259.36	0.00268	3.07e-12
P62753	RPS6	ribosomal protein S6	357.99	503.28	456.03	725.68	705.17	585.73	764.13	699.21	668.96	3.78e-07	9.9e-20
Q15418	RPS6KA1	ribosomal protein S6 kinase, 90kDa, polypeptide 1	46.14	70.33	93.56	103.5	121.81	107.08	40.5	29.53	33.5	0.00024	5.44e-15
P51812	RPS6KA3	ribosomal protein S6 kinase, 90kDa, polypeptide 3	29.03	43.24	55.9	57.75	87.9	13.85	47.81	66.77	40.12	0.00175	1.29e-05
Q9UBS0	RPS6KB2	ribosomal protein S6 kinase, 70kDa, polypeptide 2				51.96
P62081	RPS7	ribosomal protein S7	182.43	353.48	362.81	508.42	631.38	525.39	652.38	671.94	639.13	7.75e-05	1.67e-15
P62241	RPS8	ribosomal protein S8	527.75	563.38	551.85	741.53	774.92	745.07	844.49	928.87	853.74	0.000123	9.9e-20
P46781	RPS9	ribosomal protein S9	254.91	391.54	309.4	301.52	362.3	358.65	426.74	382.92	395.67	4.73e-07	9.9e-20
P08865	RPSA	ribosomal protein SA		51.35	46.2	140.62	145.92	179.05	208.83	186.64	262.13	0.00647	1.3e-09
Q92600	RQCD1	RCD1 required for cell differentiation1 homolog (S. pombe)		24.6		54.6	63.62	80.13	55.13	55.33		0.392	0.558
P10301	RRAS	related RAS viral (r-ras) oncogene homolog	41.28	40.06	46.46	61.37	65.4	88.28	59.75	76.72	80.11
P62070	RRAS2	related RAS viral (r-ras) oncogene homolog 2	137.62	140.72	194.35	161.1	125.99	145.14	223.18	164.5	266.18	7.31e-05	1.77e-10
P56182	RRP1	ribosomal RNA processing 1				60.23	60	55.48
Q96EU6	RRP36	ribosomal RNA processing 36				63.04	59.34	61.19	53.23	65.96	65.57
O43818	RRP9	ribosomal RNA processing 9, small subunit (SSU) processome component, homolog (yeast)	44.85	73.93		129.16	164.61	91.7	46.48	27.81		0.00197	1.29e-06
Q15404	RSU1	Ras suppressor protein 1				134.43	167.47	202.35			62.63	0.238	0.0409
Q9Y3I0	RTCB	RNA 2',3'-cyclic phosphate and 5'-OH ligase	138.3	139.06	94.11	309.83	428.28	479.21	500.9	350.29	329.98	0.0269	3.46e-12
Q9BST9	RTKN	rhotekin				35.84			42.92	22.94	25.81
Q9Y265	RUVBL1	RuvB-like AAA ATPase 1	181.98	165.39	236.32	276.04	328.44	310.59	213.88	302.05	165.83	9.17e-06	9.9e-20
Q9Y230	RUVBL2	RuvB-like AAA ATPase 2	210.1	303.35	354.8	550.64	605.96	532.7	305.36	386.95	365.07	5.33e-05	9.9e-20
P60903	S100A10	S100 calcium binding protein A10				37.14		27.51	23.39	27.86
Q9NTJ5	SACM1L	SAC1 suppressor of actin mutations 1-like (yeast)		68.89	47.69	124.93	83.28	130.89	166.66	44.52	119.41	0.0872	0.000596
Q9Y3Z3	SAMHD1	SAM domain and HD domain 1		49.46	81.58	259.37	268.68	243.2	261.72	180.3	190.43	0.00157	3.03e-12
Q9Y6U3	SCIN	scinderin	936.12	1128.86	1384.23	1732.33	1659.49	1684.13	1682.77	1577.86	1689.07	5.33e-07	9.9e-20
P34741	SDC2	syndecan 2	29.59	47.65	52.72	141.37	119.36	73.83				0.0041	0.365
Q9HCN8	SDF2L1	stromal cell-derived factor 2-like 1	31.66	109.49	61.96	188.21	197.82	317.96	159.03	141.56	159.96	0.0558	1.59e-12
Q9BRK5	SDF4	stromal cell derived factor 4	86.99	82.27	78.16	105.31	233.91	123.19	24.3	37.5		0.000228	1.28e-05
O95810	SDPR	serum deprivation response				184.6	195.79	206.69	116.78	102	131.33	0.00242	1.1e-13
O15027	SEC16A	SEC16 homolog A, endoplasmic reticulum export factor	56.2	38.24	55.18	197.53	194.28	141.67	150.24	208	143.83	0.00134	9.9e-20
Q9P0V9	2010-09-01	septin 10	31.83	60.26	68.36	137.7	208.35	144.57	191.07	161.76	188.66	0.00813	4.44e-16
Q9NVA2	2011-09-01	septin 11	86.03	144.81	113.57	242.37	265.15	252.16	233.54	192.93	294.69	3.17e-06	9.9e-20
Q15019	2002-09-01	septin 2	128.19	206.05	194.11	439.56	715.4	511	690.98	510.11	609.18	2.72e-05	9.9e-20
Q16181	2007-09-01	septin 7	56.08	144.34	148.66	223.91	371.89	389.2	372.9	434.91	385.78	9.37e-05	9.9e-20
Q92599	2008-09-01	septin 8	86.03	112.74	112.87	62.68	72.59	68.22	165.02	94.62	130.37	0.00151	2.74e-11
Q9UHD8	2009-09-01	septin 9	51.68	243.99	150.29	438.32	525.61	560.95	677.16	580.77	527.04	1.7e-06	9.9e-20
Q8NC51	SERBP1	SERPINE1 mRNA binding protein 1	56.15	73.86	84.16	216.31	226.79	208.73	184.07	192.83	205.21	0.000133	9.9e-20
P50454	SERPINH1	serpin peptidase inhibitor, clade H (heat shock protein 47), member 1, (collagen binding protein 1)	192.46	416.83	336.68	567.47	761.65	695.71	451.4	630.54	631.89	0.000104	9.9e-20
O75533	SF3B1	splicing factor 3b, subunit 1, 155kDa				94.44	43.66	62.11				0.012	0.00791
Q13435	SF3B2	splicing factor 3b, subunit 2, 145kDa	50.57	110.16	120.18	195.44	244.7	165.67	79.69	123.74	95.55	1.95e-08	9.9e-20
Q15427	SF3B4	splicing factor 3b, subunit 4, 49kDa			20.42	36.73	59.29	33.27
P23246	SFPQ	splicing factor proline/glutamine-rich	106.03	167.41	181.52	606.36	478.43	606.08	400.19	369.53	382.16	2.57e-11	9.9e-20
O95470	SGPL1	sphingosine-1-phosphate lyase 1	31.99	43.29	24.76	216.49	320.69	239.48	89.17	112.98	77.47	0.000951	1.33e-15
Q8TBC3	SHKBP1	SH3KBP1 binding protein 1				37.02	43.73	62.97	59.26	68.23	35.36	0.0609	3.44e-06
P34897	SHMT2	serine hydroxymethyltransferase 2 (mitochondrial)	117.72	155.2	150.13	144.41	255.13	198.06	192.4	102.19	152.68	0.00624	3.05e-12
Q8TF72	SHROOM3	shroom family member 3	138	117.91	140.76	93.72	85.52	155.81	214.46	260.21	296.16	4.3e-05	9.9e-20
Q96FS4	SIPA1	signal-induced proliferation-associated 1	41.51	156.84	53.84	116.41	177.07	159.93	254.08	196.58	312.51	0.0827	3.68e-08
P42285	SKIV2L2	superkiller viralicidic activity 2-like 2 (S. cerevisiae)	40.83	51.36	28.25	191.88	87.18	280.49	35.6	66.92	27.41	0.0397	5.25e-13
Q00325	SLC25A3	solute carrier family 25 (mitochondrial carrier; phosphate carrier), member 3				44.22	40.92	24.82	27.12	27.07	35.59	0.0745	0.000597
P05141	SLC25A5	solute carrier family 25 (mitochondrial carrier; adenine nucleotide translocator), member 5	44.43	39.31	63.03	63.83	40.46	49.89			31.07	0.269	0.00114
Q5K4L6	SLC27A3	solute carrier family 27 (fatty acid transporter), member 3				51.16	91.44	28.63		28.94		0.0409	0.00435
Q9ULF5	SLC39A10	solute carrier family 39 (zinc transporter), member 10				49.8	72.08	62.25	69.81	54.86	58.61
Q01650	SLC7A5	solute carrier family 7 (amino acid transporter light chain, L system), member 5		38.18	22.44	45.62	78.55	30.05	95.72	33.57	57.05
P84022	SMAD3	SMAD family member 3				120.52	65.88	56.92			32.54	0.152	0.449
O60264	SMARCA5	SWI/SNF related, matrix associated, actin dependent regulator of chromatin, subfamily a, member 5		107.17	47.35	192.19	188.26	194.61	133.26	164.09	155.49	0.00593	6.4e-07
Q14683	SMC1A	structural maintenance of chromosomes 1A	74.71	215.75	245.07	879.59	748.65	829.08	253.88	359.06	443.87	3.16e-12	9.9e-20
O95347	SMC2	structural maintenance of chromosomes 2	108.78	206.94	191.24	733.02	839.16	767.81	207.38	192.34	148.92	6.32e-10	9.9e-20
Q9UQE7	SMC3	structural maintenance of chromosomes 3	55.65	154.38	118.99	886.06	924.56	1012.6	355.72	250.05	161.67	1.72e-12	9.9e-20
Q9NTJ3	SMC4	structural maintenance of chromosomes 4	157.32	242.63	198.41	813.98	1002.49	940.9	476.23	573.45	485.5	2.4e-09	9.9e-20
Q16637	SMN1	survival Of Motor Neuron 1		41.67	59.24	173	106.76	122.22	118.73	137.34	122.24	0.0071	1.07e-14
Q2TAY7	SMU1	smu-1 suppressor of mec-8 and unc-52 homolog (C. elegans)				43.02	114.08	36.03	37.49	35.43	39.2	0.164	0.0283
O00161	SNAP23	synaptosomal-associated protein, 23kDa	43.38	44.66	44.17	58.81	38.75	54.62				0.634	4.25e-05
Q7KZF4	SND1	staphylococcal nuclease and tudor domain containing 1	973.07	1097.97	1219.66	1936.29	2082.03	1898.12	1592.85	1550.35	1671.89	1.84e-10	9.9e-20
O75643	SNRNP200	small nuclear ribonucleoprotein 200kDa (U5)	127.06	179.78	298.96	712.61	1038.36	763.7	380.69	331.38	391.28	7.5e-05	9.9e-20
P09661	SNRPA1	small nuclear ribonucleoprotein polypeptide A'				64.28	61.69	53.12
P62314	SNRPD1	small nuclear ribonucleoprotein D1 polypeptide 16kDa		54.25		89.08	108.05	93.12	50.96	38.09	38.35	0.424	0.000863
P62306	SNRPF	small nuclear ribonucleoprotein polypeptide F		33.89	28.5	90.76	62.79	83.28	51.6	42.11	55.46
P55769	SNU13	SNU13 homolog, small nuclear ribonucleoprotein (U4/U6.U5)				50.51	49.55	69.18
Q9Y5X1	SNX9	sorting nexin 9		57.77	63.89	82.67	88.12	88.36	33.45	54.51	49.1	0.0302	3.46e-05
Q8NB90	SPATA5	spermatogenesis associated 5		29.16		156.45	353.43	194.53	64	86.78	65.87	0.00064	1.72e-13
Q9BVQ7	SPATA5L1	spermatogenesis associated 5-like 1				59.8		51.58		105.06	116.83	0.316	0.299
Q69YQ0	SPECC1L	sperm antigen with calponin homology and coiled-coil domains 1-like	123.21	167.58	189.78	259.2	308.1	336.33	441.13	310.31	356.2	2.73e-06	9.9e-20
Q08AE8	SPIRE1	spire-type actin nucleation factor 1				50.7	31.25			24.84		0.0259	0.000625
Q13813	SPTAN1	spectrin, alpha, non-erythrocytic 1	1079.17	1896.28	1610.3	1692.15	2143.54	1726.85	1109.57	1106.41	747.32	5.33e-15	9.9e-20
Q01082	SPTBN1	spectrin, beta, non-erythrocytic 1	1637.34	2276.45	1968.81	2355.2	2665.64	2679.21	2718.18	2742.19	2879.68	9.9e-20	9.9e-20
O15020	SPTBN2	spectrin, beta, non-erythrocytic 2	47.96	69.32	82.14	164.17	117.21	138.88	139.1	118.33	128.22	0.000371	3.3e-09
Q13501	SQSTM1	sequestosome 1	57.06			209.62	148.55	287.34	187.1	114.02	225.46	0.0178	0.00379
P12931	SRC	SRC proto-oncogene, non-receptor tyrosine kinase	54.4	81.82	24.42	92.2	90.26	146.24	132.46	163.23	151.63	0.0147	1.45e-09
Q7Z6B7	SRGAP1	SLIT-ROBO Rho GTPase activating protein 1	140.5	166.26	176.59	247.92	298.41	287.7	260.35	204.7	239.76	0.00118	4.14e-11
O75044	SRGAP2	SLIT-ROBO Rho GTPase activating protein 2	606.02	811.07	798.18	807.21	775.26	752.7	982.32	1013.57	1210.24	5.4e-11	9.9e-20
P37108	SRP14	signal recognition particle 14kDa (homologous Alu RNA binding protein)	107.49	61.05	135.45	214.3	134.74	131.42	104.59	78.22	98.42	1.71e-05	1.32e-12
Q9UHB9	SRP68	signal recognition particle 68kDa	27.18	68.68	41.5	85.83	198.28	129.03	58.58	63.15		0.00262	7.55e-06
O76094	SRP72	signal recognition particle 72kDa	54.16	67.11	34.64	95.72	177.68	114.51	30.13	56.92	59.89	6.73e-06	6.11e-06
P49458	SRP9	signal recognition particle 9kDa	20.33	89.88	72.75	125.34	132.85	139.41	128.77	121.32	108.84	0.0901	0.00123
Q96SB4	SRPK1	SRSF protein kinase 1	57.73			77.72	133.86	96.73	29.87	27.2	43.37	0.00455	4.08e-13
P78362	SRPK2	SRSF protein kinase 2				36.07	81.3	57.76	30.79	61.05	74.96	0.00539	0.000449
Q9Y5M8	SRPRB	signal recognition particle receptor, B subunit		28.1		62.35	70.38	57.98	50.84	81.68		0.207	0.00731
Q07955	SRSF1	serine/arginine-rich splicing factor 1	42.74	32.12		38.9	26.79	29.13				0.0094	0.000717
Q01130	SRSF2	serine/arginine-rich splicing factor 2	54.22	70.96	81.55	83.13	98.66	69.97
Q08170	SRSF4	serine/arginine-rich splicing factor 4	55.63	72.07	75.37	58.07	66.78	58.82	59.05	54.58	99.86	0.0066	1.64e-05
Q13243	SRSF5	serine/arginine-rich splicing factor 5	55.63	59.43	64.89	136.63	106.66	112.72	102.86	88.69	84.48	0.048	5.7e-06
Q16629	SRSF7	serine/arginine-rich splicing factor 7			29.28	49.22	60.57	61.04	52.14	51.26	51.09
Q8WYL5	SSH1	slingshot protein phosphatase 1		85.24	59.58	84.28	142.8	111.51	82.64	104.53	71.29	0.0148	1.15e-05
Q76I76	SSH2	slingshot protein phosphatase 2	26.04	24.66	52.14	54.2	50.65	33.45	78.61	62.69	73.87	0.0145	0.000306
Q08945	SSRP1	structure specific recognition protein 1	167.16	229.25	175.13	327.41	372.47	419.24	208.21	190.79	240.92	0.00176	9.9e-20
P42224	STAT1	signal transducer and activator of transcription 1, 91kDa	66.68	80.87	140.49	208.65	241.89	179.4	89.45	68.17	73.41	0.0289	3.1e-08
O95793	STAU1	staufen double-stranded RNA binding protein 1	77	121.26	145.09	216.87	221.77	193.52	114.26	137.3	129.76	0.000234	5.55e-16
P31948	STIP1	stress-induced phosphoprotein 1		55.94		56.4	52.37	36.24	46.04	44.6		0.418	0.0514
Q8WXE9	STON2	stonin 2				44.53	94.68	42.21		37.5
Q9Y3F4	STRAP	serine/threonine kinase receptor associated protein			23.91	149.98	178.15	195.59	110.58	97.81	110.07	0.00355	1.63e-08
O43815	STRN	striatin, calmodulin binding protein	32.66	53.49	44.06	120.91	122.17	165.71	115.2	31.99	155.5	0.122	3.72e-05
Q13033	STRN3	striatin, calmodulin binding protein 3	63.51	60.01	59.1	195.99	159.06	149.51	78.07	74.93	106.15	0.00124	6.07e-08
Q9NRL3	STRN4	striatin, calmodulin binding protein 4	45.75	39.82	42.57	87.64	125.8	79.92		67.73	91	0.00309	2.24e-06
P53999	SUB1	SUB1 homolog, transcriptional regulator	52.31	65.43	118.67	93.11	118.21	106.98	55.11	42.94	47.78	0.0134	2.59e-06
Q9P2R7	SUCLA2	succinate-CoA ligase, ADP-forming, beta subunit			25.77	61.59	72.05	72.14	33.04	39.46	45.54	0.0266	4.94e-08
P53597	SUCLG1	succinate-CoA ligase, alpha subunit		24.87		106.08	179.94	167.57	105.72	93.03	92.51	0.0111	6.94e-08
Q9Y5B9	SUPT16H	SPT16 homolog, facilitates chromatin remodeling subunit	260.08	286.16	251.3	651.29	771.58	828.54	238.38	330.87	282.12	4.05e-07	9.9e-20
Q15022	SUZ12	SUZ12 polycomb repressive complex 2 subunit				44.27		61.78	47.84	62.03	81.38
O60506	SYNCRIP	synaptotagmin binding, cytoplasmic RNA interacting protein	83.93	66.42	59.9	54.36				29.76	28.61	0.0509	0.000609
Q96BW9	TAMM41	TAM41 mitochondrial translocator assembly and maintenance homolog				49.24	50.35
Q9UL54	TAOK2	TAO kinase 2				56.65	63.02
Q9BW92	TARS2	threonyl-tRNA synthetase 2, mitochondrial (putative)				48.5	46.12	37.48		21.6		0.032	8.14e-07
O60343	TBC1D4	TBC1 domain family, member 4				137.27	72.3	103.13				0.0674	3.02e-06
Q9UHD2	TBK1	TANK-binding kinase 1		26.12		88.13	80.43	115.52	126.99	92.95	163.89	0.00126	6.65e-10
Q9Y4P3	TBL2	transducin (beta)-like 2			22.04	43.23	53.61	56.44	71.12	66.96	59.64
Q12788	TBL3	transducin (beta)-like 3				50.56	66.44
Q15369	TCEB1	transcription elongation factor B (SIII), polypeptide 1 (15kDa, elongin C)				136.99	103.28	100.66	27.91	30.52	35.73	0.52	0.913
Q14241	TCEB3	transcription elongation factor B (SIII), polypeptide 3 (110kDa, elongin A)				51.23	77.93	101.23	46.05	41.23	41.03	0.172	0.00112
Q9BQ70	TCF25	transcription factor 25 (basic helix-loop-helix)		34.24	48.18	112.58	183.25	135.22	26.04	54.31	42.88	0.000326	3.09e-07
Q13428	TCOF1	Treacher Collins-Franceschetti syndrome 1		71.67	45.26	247.25	300.96	238.51	168.14	161.9	179.09	0.00847	0.000111
P17987	TCP1	t-complex 1	312.85	453.28	383.89	843.4	853.58	1158.98	907.32	1069.48	997.17	0.000438	9.9e-20
Q9NZ01	TECR	trans-2,3-enoyl-CoA reductase		23.19		44.61	46.99	34.58	33.6	42.86	35.91
P54274	TERF1	telomeric repeat binding factor (NIMA-interacting) 1				39.19		28.01
Q9UGI8	TES	testin LIM domain protein	261.52	330.26	312.15	514.39	581.8	533.72	476.79	503.07	475.48	2.29e-07	9.9e-20
Q9H5Q4	TFB2M	transcription factor B2, mitochondrial				45.14	37.83	35.96				0.213	1.96e-06
P49746	THBS3	thrombospondin 3				39.44	58.93	55.46	25.11	45.18	45.22
Q9Y2W1	THRAP3	thyroid hormone receptor associated protein 3		31.72	29.37	148.68	229.29	132.35	74.1	89.72	95.49	1.46e-05	9.9e-20
O43615	TIMM44	translocase of inner mitochondrial membrane 44 homolog (yeast)	75.47	183.37	147.49	177.08	307.52	220.72	78.55	88.67	116.85	0.000332	6.55e-15
Q07157	TJP1	tight junction protein 1	149.96	156.86	165.31	213.04	204.25	196.21	256.52	223.53	274.43	7.59e-06	9.9e-20
Q86UE8	TLK2	tousled-like kinase 2	29.03	43.24	26.11	37.34	23.71
Q9BVC6	TMEM109	transmembrane protein 109		37.25		42.86		28.11	54.7	52.05	46.07	0.077	5.38e-05
Q9NYL9	TMOD3	tropomodulin 3 (ubiquitous)	358.07	473.32	423.47	384.31	489.25	549.95	623.12	598.41	597.01	5.54e-05	9.9e-20
P42166	TMPO	thymopoietin	667.08	923.34	849.53	1112.6	1185.47	1087.47	1070.71	1115.16	1040.5	9.08e-07	9.9e-20
P42167	TMPO	thymopoietin	225.95	338.63	372.91	566.75	574.43	545.33	397.2	459.07	487.15	0.00012	9.9e-20
O95407	TNFRSF6B	tumor necrosis factor receptor superfamily, member 6b, decoy				49.11	48.32	38.44	50.22	42.27	50.74
O95271	TNKS	tankyrase, TRF1-interacting ankyrin-related ADP-ribose polymerase				128.01	67.12	122.89	26.21	66.85		0.0337	6.49e-11
Q9C0C2	TNKS1BP1	tankyrase 1 binding protein 1, 182kDa	32.3	90.68	92.13	271.04	376.64	362.39	406.99	228.26	444.63	1.66e-06	9.9e-20
Q96GM8	TOE1	target of EGR1, member 1 (nuclear)				109.86	116.5	97.36	44.47	57.25	65.07	0.0235	4.5e-08
P11387	TOP1	topoisomerase (DNA) I	28.91	24.69	53.67	101.61	58.05	82.41				0.00937	2.59e-09
P11388	TOP2A	topoisomerase (DNA) II alpha	36.91	56.7	57.49	144.2	157.95	159.41				0.0441	1.96e-05
Q02880	TOP2B	topoisomerase (DNA) II beta	36.91	84.55	67.62	364.1	363.23	402.7	114.26	45.19	142.16	0.0152	3.21e-12
Q5JTV8	TOR1AIP1	torsin A interacting protein 1				80.74	47.05	104.77	79.27	84.2	29.56	0.00105	1.58e-06
P04637	TP53	tumor protein p53				44.37		39.44		52.03	37.95
P09493	TPM1	tropomyosin 1 (alpha)	64.17	69.16	63.32	174.6	220.47	242.43	190.89	222.01	236.98	6.19e-07	9.9e-20
P06753	TPM3	tropomyosin 3	66.46	73.89	68.08	167.13	205.12	224.53	188.42	197.3	243.72	0.000728	9.9e-20
P67936	TPM4	tropomyosin 4	64.17	107.44	81.28	208.56	230.7	257.19	204.43	263.3	253.51	5.93e-06	9.9e-20
P29144	TPP2	tripeptidyl peptidase II				3097.16	3873.96	3592.38	3152.56	3088.61	2898.42	1.11e-16	9.9e-20
Q12931	TRAP1	TNF receptor-associated protein 1	112.55	139.95	207.29	81.47	131.97	138.87	129.05	266.14	217.72	0.392	0.000358
Q96Q05	TRAPPC9	trafficking protein particle complex 9				43.39	35.09	37.2
P19474	TRIM21	tripartite motif containing 21	555.71	650.17	714.21	189.97	159.96	220.95	139.03	80.98	115.18	0.0226	8.22e-06
Q14258	TRIM25	tripartite motif containing 25	34.01	127.36	132	402.51	481.74	351.83	321.54	198.4	232.39	7.69e-07	9.9e-20
Q13263	TRIM28	tripartite motif containing 28	295.63	377.99	448.26	915	887.97	842.64	828.53	864.01	919.51	0.000254	9.9e-20
Q9BRZ2	TRIM56	tripartite motif containing 56				50.18	46.19	46.1
Q9C026	TRIM9	tripartite motif containing 9				39.34		35.6
Q9H2D6	TRIOBP	TRIO and F-actin binding protein	333.81	554.72	344.46	883.92	938.66	1142.1	883.87	960.22	930.75	3.91e-13	9.9e-20
Q15650	TRIP4	thyroid hormone receptor interactor 4	28.63	0		45.37	50.8	77.35	59.31	56.38	58.01	0.381	0.00108
Q9UI30	TRMT112	tRNA methyltransferase 11-2 homolog (S. cerevisiae)	69.52	91.2	107.96	187.63	87.68	85.59	117.36	120.2	125.59	0.219	0.0035
Q7Z2T5	TRMT1L	tRNA methyltransferase 1-like				60.1	98.67	116.57	34.94	41.5	26.98
Q92574	TSC1	tuberous sclerosis 1				109.74	95.46	180.69	40.45	63.66	60.41	0.0127	4.8e-11
P49815	TSC2	tuberous sclerosis 2				58.79	68.07	34.54				0.111	0.00507
Q2NL82	TSR1	TSR1, 20S rRNA accumulation, homolog (S. cerevisiae)	186.75	151.61	161.26	156.81	204.85	224.37	159.56	133.74	122.44	0.014	9.9e-20
Q96AY4	TTC28	tetratricopeptide repeat domain 28		29.73		841.78	990.64	871.5	467.92	705.34	768.36	6.53e-14	9.9e-20
Q71U36	TUBA1A	tubulin, alpha 1a	799.27	985.37	1034.67	1149.46	1295.68	1313.83	1410.77	1441.5	1334.72	0.00653	9.9e-20
Q9BQE3	TUBA1C	tubulin, alpha 1c	866.89	1099.16	1118.15	1218.04	1347.34	1308.27	1466.43	1442.97	1397.45	0.00455	9.9e-20
P68366	TUBA4A	tubulin, alpha 4a	679.38	882.1	959.99	1005.75	1064.22	1132.45	1084.56	995.38	986.37	0.000437	9.9e-20
P07437	TUBB	tubulin, beta class I	1519.47	2051.6	1775.9	1890.56	2244.9	2165.87	2205.6	2236.7	2188.18	1.12e-06	9.9e-20
Q13885	TUBB2A	tubulin, beta 2A class IIa	1181.67	1466.41	1498.21	1634.27	1654.78	1750.98	1637.85	1679.53	1563.33	3.87e-06	9.9e-20
Q9BVA1	TUBB2B	tubulin, beta 2B class IIb	1189.67	1510.26	1519.09	1646.15	1714	1753.74	1672.99	1761.73	1648.37	3.09e-06	9.9e-20
Q13509	TUBB3	tubulin, beta 3 class III	1365.55	1584.69	1490.41	1649.42	1781.53	1704.93	1650.09	1759.44	1755.2	0.0214	9.9e-20
P04350	TUBB4A	tubulin, beta 4A class IVa	1188.23	1396.19	1438.77	1403.85	1636.41	1720.43	1393.58	1487.14	1579.16	0.026	9.9e-20
P68371	TUBB4B	tubulin, beta 4B class IVb	1417.33	1706.63	1845.2	1877.18	2029.89	2131.87	2093.01	2278.73	2241.78	0.000201	9.9e-20
Q9BUF5	TUBB6	tubulin, beta 6 class V	843.62	1034.49	1070.17	873.87	879.25	964.2	890.47	912.83	965.63	0.0852	9.9e-20
P23258	TUBG1	tubulin, gamma 1	28.55	98.71	121.85	342.24	514.88	554.84	299.71	244.59	379.38	0.151	2.32e-07
Q9BSJ2	TUBGCP2	tubulin, gamma complex associated protein 2	31.51	60.61	52.66	329.81	466.5	372.5	283.58	174.78	236.48	0.000716	9.9e-20
Q96CW5	TUBGCP3	tubulin, gamma complex associated protein 3	40.03	170.85	125.4	321.61	346.64	389.54	252.87	233.32	264.75	0.000155	2.68e-09
Q9UGJ1	TUBGCP4	tubulin, gamma complex associated protein 4	24.19	59.39	32.16	100.82	104.83	95.84				0.0986	3.84e-05
Q96RT8	TUBGCP5	tubulin, gamma complex associated protein 5				92.39	39.16	53.3				0.104	0.000167
Q96RT7	TUBGCP6	tubulin, gamma complex associated protein 6		33.46	33.97	122.58	191.07	172.03	45.57	79.03	47.07	0.0912	1.82e-07
P49411	TUFM	Tu translation elongation factor, mitochondrial	909.92	965.44	979.78	1571.96	1926.84	1926.9	1512.29	1383.97	1410.86	1.88e-12	9.9e-20
P40222	TXLNA	taxilin alpha		75.77		495.3	466.97	495.14	179.66	153.67	122.54	6.34e-07	9.9e-20
Q9NUQ3	TXLNG	taxilin gamma	68.38	50.51	60.02	85.49	153.16	172.4	27.55	57.59	46.06	8.62e-05	3.16e-09
Q01081	U2AF1/U2AF1L5	U2 small nuclear RNA auxiliary factor 1			54.35	114.43	70.64	136.7	89.32	108.94	105.11	0.0511	0.00687
O15042	U2SURP	U2 snRNP-associated SURP domain containing			41.91	56.13	51.78	68.35		23.68		0.44	0.254
Q14157	UBAP2L	ubiquitin associated protein 2-like	37.6	110.66	69.61	232.75	328.9	281.99	181.4	215.03	216.99	3.07e-06	9.9e-20
P17480	UBTF	upstream binding transcription factor, RNA polymerase I		71.84	41.74	102.87	140.49	132.42	73.14	66.7	41.62	0.000399	2.07e-10
P22695	UQCRC2	ubiquinol-cytochrome c reductase core protein II				59.01	74.15	48.44	71.77		59.73
O94763	URI1	URI1, prefoldin-like chaperone				124.46	136.11	119.25	21.93			0.0655	0.0025
Q14694	USP10	ubiquitin specific peptidase 10	67.07	100.05	143.93	286.98	394.99	343.19	113.5	261.57	265.58	0.00148	9.9e-20
Q86UV5	USP48	ubiquitin specific peptidase 48				42.56	87.88	62.05
P46939	UTRN	utrophin	144.09	426.35	435.92	585.15	562.96	691.77	524.73	554.64	612.79	2.12e-07	9.9e-20
P50552	VASP	vasodilator-stimulated phosphoprotein	28.67	76.62	29.78	172.1	167.71	151.52	132.49	208.21	234.11	0.000937	8.1e-12
P08670	VIM	vimentin	330.83	495.27	486.72	201.97	191.67	145.78	180.19	222.77	205.61	2.67e-05	9.9e-20
Q9H269	VPS16	vacuolar protein sorting 16 homolog (S. cerevisiae)		29.6	69.08	110.92	130.1	122.41	118.56	36.89		0.0593	0.000634
Q9P253	VPS18	vacuolar protein sorting 18 homolog (S. cerevisiae)				231.5	167.9	117.01		50.39		0.0425	3.98e-06
Q96AX1	VPS33A	vacuolar protein sorting 33 homolog A (S. cerevisiae)				50.55	58.98
Q9H267	VPS33B	vacuolar protein sorting 33 homolog B (yeast)				222.41	145.58	199.74	75.13	42.1	41.44	0.00021	1.44e-15
Q9UN37	VPS4A	vacuolar protein sorting 4 homolog A (S. cerevisiae)	31.45	38	74.38	58.77	76.19	88.28	21.31		26.62	0.0293	1.39e-10
Q7Z5K2	WAPL	WAPL cohesin release factor				48.31			46.3	25.34
Q9Y6W5	WASF2	WAS protein family, member 2	33.15	29.44		56.35	52.2	93.58		59.45	39.65	0.00426	1.82e-13
C4AMC7	WASH3P	WAS protein family homolog 3 pseudogene				82.94	100.41	98.37	45.65	57.84	61.66	0.0215	3.06e-05
Q9Y2W2	WBP11	WW domain binding protein 11				52.92	118.89	75.03	73.1	83.26	78.95	0.0102	7.76e-07
O43709	WBSCR22	Williams Beuren syndrome chromosome region 22		26.9	36.5	92.6	66.75	117.71	55.74		55.37	0.037	0.000152
O75717	WDHD1	WD repeat and HMG-box DNA binding protein 1	13.53	46.24	33.5	117.93	136.61	99.88	56.49	57.57	63.67	0.0103	0.000202
Q9BZH6	WDR11	WD repeat domain 11				94.37		49.16				0.66	0.00182
Q6PJI9	WDR59	WD repeat domain 59				54.52	27.46	94.64	36.85	34.82	28.7	0.246	6.48e-08
Q9GZS3	WDR61	WD repeat domain 61				40.22		66.34
O43379	WDR62	WD repeat domain 62				104.93	104.69	94.98				0.00966	0.000655
Q14191	WRN	Werner syndrome, RecQ helicase-like		68.89	34.7	239.43	283.5	196.7	163.87	184.08	129.49	0.0069	1.99e-11
Q8IX03	WWC1	WW and C2 domain containing 1	26.95	29.45		83.15	82.01	48.97	92.74	65.04	40.33	0.0148	3.17e-06
P13010	XRCC5	X-ray repair complementing defective repair in Chinese hamster cells 5 (double-strand-break rejoining)	130.12	289.96	230.86	756.88	891.71	614.32	394.15	526	495.16	0.00271	9.9e-20
P12956	XRCC6	X-ray repair complementing defective repair in Chinese hamster cells 6	234.17	357.62	361.95	592.61	603.71	632.75	439.45	481.45	543.31	0.00412	1.38e-13
Q8IZH2	XRN1	5'-3' exoribonuclease 1		21.39		36.99	85.51	80.11	71.73			0.0057	2.33e-06
Q9Y2Z4	YARS2	tyrosyl-tRNA synthetase 2, mitochondrial				145.53	330.57	214.1	83.89	102.08	70.31	0.00175	7.55e-13
P67809	YBX1	Y box binding protein 1	73.7	152.64	102.64	279.55	426.62	404.96	184.45	180.03	216.89	7.8e-08	9.9e-20
P07947	YES1	YES proto-oncogene 1, Src family tyrosine kinase	100.69	185.68	93.48	133.71	204.15	125.79	240.32	243.45	155.2	0.000509	2.42e-12
P62699	YPEL5	yippee-like 5				50.7	57.84	51.96		42.69
Q9H6S0	YTHDC2	YTH domain containing 2			26.11	94.87	134.73	84.64	20.33	26.15	26.49	0.00772	9.79e-11
P31946	YWHAB	tyrosine 3-monooxygenase/tryptophan 5-monooxygenase activation protein, beta	41.92	45.3	33.57	95.96	154.48	65.18	61.68	52.53	59.38	0.00606	0.000339
P61981	YWHAG	tyrosine 3-monooxygenase/tryptophan 5-monooxygenase activation protein, gamma	49.91	69.39	64.76	113.3	155.44	94.35	82.83	97.51	92.27	0.0469	0.00511
Q04917	YWHAH	tyrosine 3-monooxygenase/tryptophan 5-monooxygenase activation protein, eta	41.92	48.49	51.01	87.15	98.65	88.77	99.61	41.62	32.86	0.00204	3.3e-07
P27348	YWHAQ	tyrosine 3-monooxygenase/tryptophan 5-monooxygenase activation protein, theta	41.92	99.75	65.71	125.18	135.66	113.74	129.66	90.18	123.35	0.0362	0.0171
P63104	YWHAZ	tyrosine 3-monooxygenase/tryptophan 5-monooxygenase activation protein, zeta	104.97	129.4	89.69	313.81	258.41	237.86	178.5	179.02	176.73	0.0246	1.67e-10
Q96DT7	ZBTB10	zinc finger and BTB domain containing 10				151.6	117.44	105.62	53.66			0.196	4.07e-09
Q9ULJ3	ZBTB21	zinc finger and BTB domain containing 21				42.04	80.87	61.14		25.87	33.06	0.0118	0.00172
Q96GY0	ZC2HC1A	zinc finger, C2HC-type containing 1A				51.38		48.1
Q8WU90	ZC3H15	zinc finger CCCH-type containing 15	37.46	88.97	55.44	132.98	147.19	125.11	103.79	125.94	73.77	0.00932	7.77e-16
Q9UPT8	ZC3H4	zinc finger CCCH-type containing 4			21.65	130.67	115.96	139.62		85.94	58.92	0.0017	1.99e-09
Q7Z2W4	ZC3HAV1	zinc finger CCCH-type, antiviral 1	75.27	138.2	242.15	520.73	608.12	595.26	435.87	465.93	530.24	0.0104	7.77e-16
Q9NUD5	ZCCHC3	zinc finger, CCHC domain containing 3	31.98	43.03	43.91	106.09	119.05	86.6		51.16	48.21	0.0484	0.00022
P17029	ZKSCAN1	zinc finger with KRAB and SCAN domains 1				47.26
Q9Y2X9	ZNF281	zinc finger protein 281				51.64
Q5BKZ1	ZNF326	zinc finger protein 326				36.78	23.08	48.76		37.63
Q9Y3S2	ZNF330	zinc finger protein 330				38.57	69.78	54.66	57.2	36.54	28.24
Q86UK7	ZNF598	zinc finger protein 598				40.43	118.2	73.43	74.13	71.75	43.56	0.00443	3.25e-05
Q9P2E3	ZNFX1	zinc finger, NFX1-type containing 1				122.9	115.51	146.15	66.93	35.3	46.52	0.126	0.000297
Q9Y5A6	ZSCAN21	zinc finger and SCAN domain containing 21				60.73	49.73	70.16		29.2		0.00527	5.99e-08
O43264	ZW10	zw10 kinetochore protein				121.38	86.07	108.32	50.68	27.38	84.69	0.195	0.00427
Q15942	ZYX	zyxin		27.07		169.14	340.86	193.85	238.04	204.28	220.69	0.00299	1.23e-11

## Sheet: Table S5A
Table S5A: SILAC on RPE-1 cells.
Full name	Light/Heavy Ratio 1	Light/Heavy Ratio 2	Light/Heavy Ratio 3	Average
1,4-alpha-glucan-branching enzyme OS=Homo sapiens GN=GBE1 PE=1 SV=3 - [GLGB_HUMAN]	0.831611	0.674335	0.808495	0.77148
116 kDa U5 small nuclear ribonucleoprotein component OS=Homo sapiens GN=EFTUD2 PE=1 SV=1 - [U5S1_HUMAN]	1.05554	0.873406	1.24742	1.05879
14 kDa phosphohistidine phosphatase OS=Homo sapiens GN=PHPT1 PE=1 SV=1 - [PHP14_HUMAN]	1.70248	-	-	1.70248
14-3-3 protein beta/alpha OS=Homo sapiens GN=YWHAB PE=1 SV=3 - [1433B_HUMAN]	0.929201	2.46118	1.19047	1.52695
14-3-3 protein epsilon OS=Homo sapiens GN=YWHAE PE=1 SV=1 - [1433E_HUMAN]	1.01647	1.04492	0.926342	0.995909
14-3-3 protein gamma OS=Homo sapiens GN=YWHAG PE=1 SV=2 - [1433G_HUMAN]	0.997861	1.33761	1.30021	1.21189
14-3-3 protein theta OS=Homo sapiens GN=YWHAQ PE=1 SV=1 - [1433T_HUMAN]	1.09151	1.04894	0.939451	1.02663
14-3-3 protein zeta/delta OS=Homo sapiens GN=YWHAZ PE=1 SV=1 - [1433Z_HUMAN]	0.733819	0.8591	0.728362	0.77376
182 kDa tankyrase-1-binding protein OS=Homo sapiens GN=TNKS1BP1 PE=1 SV=4 - [TB182_HUMAN]	-	1.30115	-	1.30115
1-phosphatidylinositol 4,5-bisphosphate phosphodiesterase beta-3 OS=Homo sapiens GN=PLCB3 PE=1 SV=2 - [PLCB3_HUMAN]	1.87549	1.30854	-	1.59201
1-phosphatidylinositol-4,5-bisphosphate phosphodiesterase eta-1 OS=Homo sapiens GN=PLCH1 PE=1 SV=1 - [PLCH1_HUMAN]	1.20519	1.40375	-	1.30447
26S protease regulatory subunit 4 OS=Homo sapiens GN=PSMC1 PE=1 SV=1 - [PRS4_HUMAN]	0.700176	0.675946	0.612958	0.663027
26S protease regulatory subunit 6A OS=Homo sapiens GN=PSMC3 PE=1 SV=3 - [PRS6A_HUMAN]	-	-	1.6102	1.6102
26S protease regulatory subunit 7 OS=Homo sapiens GN=PSMC2 PE=1 SV=3 - [PRS7_HUMAN]	1.34747	1.94294	-	1.64521
26S proteasome non-ATPase regulatory subunit 1 OS=Homo sapiens GN=PSMD1 PE=1 SV=2 - [PSMD1_HUMAN]	0.910086	1.35299	0.909556	1.05755
26S proteasome non-ATPase regulatory subunit 12 OS=Homo sapiens GN=PSMD12 PE=1 SV=3 - [PSD12_HUMAN]	-	0.96911	-	0.96911
26S proteasome non-ATPase regulatory subunit 13 OS=Homo sapiens GN=PSMD13 PE=1 SV=2 - [PSD13_HUMAN]	4.5598	-	-	4.5598
26S proteasome non-ATPase regulatory subunit 2 OS=Homo sapiens GN=PSMD2 PE=1 SV=3 - [PSMD2_HUMAN]	0.972265	1.36544	1.00208	1.11326
26S proteasome non-ATPase regulatory subunit 3 OS=Homo sapiens GN=PSMD3 PE=1 SV=2 - [PSMD3_HUMAN]	1.06497	1.40704	1.31912	1.26371
2-oxoglutarate dehydrogenase, mitochondrial OS=Homo sapiens GN=OGDH PE=1 SV=3 - [ODO1_HUMAN]	1.24693	1.59668	0.544136	1.12925
40S ribosomal protein S10 OS=Homo sapiens GN=RPS10 PE=1 SV=1 - [RS10_HUMAN]	0.698373	0.629078	0.696137	0.674529
40S ribosomal protein S11 OS=Homo sapiens GN=RPS11 PE=1 SV=3 - [RS11_HUMAN]	0.660386	-	0.949332	0.804859
40S ribosomal protein S12 OS=Homo sapiens GN=RPS12 PE=1 SV=3 - [RS12_HUMAN]	-	0.27147	-	0.27147
40S ribosomal protein S14 OS=Homo sapiens GN=RPS14 PE=1 SV=3 - [RS14_HUMAN]	1.57007	1.64956	-	1.60982
40S ribosomal protein S15 OS=Homo sapiens GN=RPS15 PE=1 SV=2 - [RS15_HUMAN]	-	1.53049	-	1.53049
40S ribosomal protein S15a OS=Homo sapiens GN=RPS15A PE=1 SV=2 - [RS15A_HUMAN]	0.844394	0.932955	1.05051	0.942618
40S ribosomal protein S16 OS=Homo sapiens GN=RPS16 PE=1 SV=2 - [RS16_HUMAN]	0.957822	0.909412	0.742368	0.869868
40S ribosomal protein S17-like OS=Homo sapiens GN=RPS17L PE=1 SV=1 - [RS17L_HUMAN]	-	-	0.983231	0.983231
40S ribosomal protein S18 OS=Homo sapiens GN=RPS18 PE=1 SV=3 - [RS18_HUMAN]	1.5054	0.870632	1.33127	1.23577
40S ribosomal protein S19 OS=Homo sapiens GN=RPS19 PE=1 SV=2 - [RS19_HUMAN]	-	-	1.02657	1.02657
40S ribosomal protein S2 OS=Homo sapiens GN=RPS2 PE=1 SV=2 - [RS2_HUMAN]	1.04432	1.04093	0.665091	0.916778
40S ribosomal protein S20 OS=Homo sapiens GN=RPS20 PE=1 SV=1 - [RS20_HUMAN]	1.99227	-	-	1.99227
40S ribosomal protein S23 OS=Homo sapiens GN=RPS23 PE=1 SV=3 - [RS23_HUMAN]	0.752066	0.74939	0.764377	0.755278
40S ribosomal protein S24 OS=Homo sapiens GN=RPS24 PE=1 SV=1 - [RS24_HUMAN]	0.607668	0.617566	1.23391	0.819714
40S ribosomal protein S25 OS=Homo sapiens GN=RPS25 PE=1 SV=1 - [RS25_HUMAN]	-	0.688273	-	0.688273
40S ribosomal protein S26 OS=Homo sapiens GN=RPS26 PE=1 SV=3 - [RS26_HUMAN]	-	-	1.00435	1.00435
40S ribosomal protein S3 OS=Homo sapiens GN=RPS3 PE=1 SV=2 - [RS3_HUMAN]	0.722677	0.702156	0.935457	0.786763
40S ribosomal protein S3a OS=Homo sapiens GN=RPS3A PE=1 SV=2 - [RS3A_HUMAN]	1.28638	0.881292	1.4922	1.21996
40S ribosomal protein S4, X isoform OS=Homo sapiens GN=RPS4X PE=1 SV=2 - [RS4X_HUMAN]	2.11321	1.13636	0.846942	1.3655
40S ribosomal protein S5 OS=Homo sapiens GN=RPS5 PE=1 SV=4 - [RS5_HUMAN]	0.723934	0.693014	0.783447	0.733465
40S ribosomal protein S6 OS=Homo sapiens GN=RPS6 PE=1 SV=1 - [RS6_HUMAN]	-	1.22122	-	1.22122
40S ribosomal protein S7 OS=Homo sapiens GN=RPS7 PE=1 SV=1 - [RS7_HUMAN]	0.990987	1.09466	1.06158	1.04908
40S ribosomal protein S8 OS=Homo sapiens GN=RPS8 PE=1 SV=2 - [RS8_HUMAN]	1.11372	1.10137	1.06016	1.09175
40S ribosomal protein SA OS=Homo sapiens GN=RPSA PE=1 SV=4 - [RSSA_HUMAN]	0.873878	1.3376	1.1234	1.11163
4F2 cell-surface antigen heavy chain OS=Homo sapiens GN=SLC3A2 PE=1 SV=3 - [4F2_HUMAN]	0.80908	0.686895	0.899022	0.798332
4-trimethylaminobutyraldehyde dehydrogenase OS=Homo sapiens GN=ALDH9A1 PE=1 SV=3 - [AL9A1_HUMAN]	1.14349	0.992423	-	1.06795
5'-nucleotidase OS=Homo sapiens GN=NT5E PE=1 SV=1 - [5NTD_HUMAN]	1.01979	0.934216	0.923447	0.959152
60 kDa heat shock protein, mitochondrial OS=Homo sapiens GN=HSPD1 PE=1 SV=2 - [CH60_HUMAN]	0.882453	1.00837	0.896614	0.929145
60S acidic ribosomal protein P0 OS=Homo sapiens GN=RPLP0 PE=1 SV=1 - [RLA0_HUMAN]	0.815784	0.706563	0.87337	0.798572
60S acidic ribosomal protein P1 OS=Homo sapiens GN=RPLP1 PE=1 SV=1 - [RLA1_HUMAN]	2.1217	1.26672	1.94746	1.77863
60S acidic ribosomal protein P2 OS=Homo sapiens GN=RPLP2 PE=1 SV=1 - [RLA2_HUMAN]	0.644074	0.771189	0.895664	0.770309
60S ribosomal protein L10a OS=Homo sapiens GN=RPL10A PE=1 SV=2 - [RL10A_HUMAN]	1.19458	-	-	1.19458
60S ribosomal protein L12 OS=Homo sapiens GN=RPL12 PE=1 SV=1 - [RL12_HUMAN]	0.893583	0.920137	1.11207	0.975263
60S ribosomal protein L13 OS=Homo sapiens GN=RPL13 PE=1 SV=4 - [RL13_HUMAN]	0.55622	0.567164	0.704081	0.609155
60S ribosomal protein L13a OS=Homo sapiens GN=RPL13A PE=1 SV=2 - [RL13A_HUMAN]	1.15612	1.37677	1.30919	1.28069
60S ribosomal protein L14 OS=Homo sapiens GN=RPL14 PE=1 SV=4 - [RL14_HUMAN]	1.09323	0.810754	0.951432	0.951805
60S ribosomal protein L15 OS=Homo sapiens GN=RPL15 PE=1 SV=2 - [RL15_HUMAN]	-	1.36818	1.40596	1.38707
60S ribosomal protein L18 OS=Homo sapiens GN=RPL18 PE=1 SV=2 - [RL18_HUMAN]	1.14347	1.03271	0.931421	1.03587
60S ribosomal protein L18a OS=Homo sapiens GN=RPL18A PE=1 SV=2 - [RL18A_HUMAN]	-	-	0.418896	0.418896
60S ribosomal protein L19 OS=Homo sapiens GN=RPL19 PE=1 SV=1 - [RL19_HUMAN]	-	1.41112	1.40174	1.40643
60S ribosomal protein L21 OS=Homo sapiens GN=RPL21 PE=1 SV=2 - [RL21_HUMAN]	-	0.710872	-	0.710872
60S ribosomal protein L22 OS=Homo sapiens GN=RPL22 PE=1 SV=2 - [RL22_HUMAN]	1.40964	0.929816	0.653886	0.997781
60S ribosomal protein L23 OS=Homo sapiens GN=RPL23 PE=1 SV=1 - [RL23_HUMAN]	1.16245	1.44284	1.47369	1.35966
60S ribosomal protein L23a OS=Homo sapiens GN=RPL23A PE=1 SV=1 - [RL23A_HUMAN]	0.858557	1.02321	1.44892	1.11023
60S ribosomal protein L24 OS=Homo sapiens GN=RPL24 PE=1 SV=1 - [RL24_HUMAN]	0.738708	0.662111	0.587714	0.662844
60S ribosomal protein L26 OS=Homo sapiens GN=RPL26 PE=1 SV=1 - [RL26_HUMAN]	2.65244	1.15827	-	1.90535
60S ribosomal protein L27 OS=Homo sapiens GN=RPL27 PE=1 SV=2 - [RL27_HUMAN]	0.911012	0.889495	0.92178	0.907429
60S ribosomal protein L27a OS=Homo sapiens GN=RPL27A PE=1 SV=2 - [RL27A_HUMAN]	1.27054	1.28089	-	1.27572
60S ribosomal protein L28 OS=Homo sapiens GN=RPL28 PE=1 SV=3 - [RL28_HUMAN]	1.01717	1.20653	1.14111	1.1216
60S ribosomal protein L29 OS=Homo sapiens GN=RPL29 PE=1 SV=2 - [RL29_HUMAN]	1.74816	1.84208	-	1.79512
60S ribosomal protein L3 OS=Homo sapiens GN=RPL3 PE=1 SV=2 - [RL3_HUMAN]	0.878532	0.901432	1.12126	0.967075
60S ribosomal protein L30 OS=Homo sapiens GN=RPL30 PE=1 SV=2 - [RL30_HUMAN]	1.08057	1.03208	0.96734	1.02666
60S ribosomal protein L31 OS=Homo sapiens GN=RPL31 PE=1 SV=1 - [RL31_HUMAN]	-	1.25131	1.69019	1.47075
60S ribosomal protein L36a OS=Homo sapiens GN=RPL36A PE=1 SV=2 - [RL36A_HUMAN]	1.19755	-	1.26176	1.22966
60S ribosomal protein L37a OS=Homo sapiens GN=RPL37A PE=1 SV=2 - [RL37A_HUMAN]	0.760137	-	-	0.760137
60S ribosomal protein L4 OS=Homo sapiens GN=RPL4 PE=1 SV=5 - [RL4_HUMAN]	1.03617	0.910189	1.07038	1.00558
60S ribosomal protein L5 OS=Homo sapiens GN=RPL5 PE=1 SV=3 - [RL5_HUMAN]	1.08875	1.01255	1.03772	1.04634
60S ribosomal protein L6 OS=Homo sapiens GN=RPL6 PE=1 SV=3 - [RL6_HUMAN]	1.05305	1.0493	0.904597	1.00231
60S ribosomal protein L7 OS=Homo sapiens GN=RPL7 PE=1 SV=1 - [RL7_HUMAN]	1.07969	0.894887	0.933794	0.969457
60S ribosomal protein L7a OS=Homo sapiens GN=RPL7A PE=1 SV=2 - [RL7A_HUMAN]	0.820365	0.937554	0.996031	0.917983
60S ribosomal protein L8 OS=Homo sapiens GN=RPL8 PE=1 SV=2 - [RL8_HUMAN]	-	0.912124	0.926448	0.919286
60S ribosomal protein L9 OS=Homo sapiens GN=RPL9 PE=1 SV=1 - [RL9_HUMAN]	1.50158	1.89221	1.42167	1.60515
6-phosphofructokinase type C OS=Homo sapiens GN=PFKP PE=1 SV=2 - [K6PP_HUMAN]	0.82792	0.876393	0.820752	0.841689
6-phosphofructokinase, liver type OS=Homo sapiens GN=PFKL PE=1 SV=6 - [K6PL_HUMAN]	-	-	1.50796	1.50796
6-phosphogluconate dehydrogenase, decarboxylating OS=Homo sapiens GN=PGD PE=1 SV=3 - [6PGD_HUMAN]	0.879862	1.08304	0.863809	0.942238
72 kDa type IV collagenase OS=Homo sapiens GN=MMP2 PE=1 SV=2 - [MMP2_HUMAN]	1.12695	1.03194	0.962423	1.04044
78 kDa glucose-regulated protein OS=Homo sapiens GN=HSPA5 PE=1 SV=2 - [GRP78_HUMAN]	0.962258	1.03751	0.924718	0.97483
7-dehydrocholesterol reductase OS=Homo sapiens GN=DHCR7 PE=1 SV=1 - [DHCR7_HUMAN]	0.743689	0.748599	0.894585	0.795624
Acetyl-CoA acetyltransferase, cytosolic OS=Homo sapiens GN=ACAT2 PE=1 SV=2 - [THIC_HUMAN]	1.34312	1.62023	1.14448	1.36927
Acetyl-CoA acetyltransferase, mitochondrial OS=Homo sapiens GN=ACAT1 PE=1 SV=1 - [THIL_HUMAN]	2.32744	-	-	2.32744
Aconitate hydratase, mitochondrial OS=Homo sapiens GN=ACO2 PE=1 SV=2 - [ACON_HUMAN]	1.62672	1.71446	2.14665	1.82928
Actin, alpha cardiac muscle 1 OS=Homo sapiens GN=ACTC1 PE=1 SV=1 - [ACTC_HUMAN]	1.06074	1.1091	1.06122	1.07702
Actin, cytoplasmic 1 OS=Homo sapiens GN=ACTB PE=1 SV=1 - [ACTB_HUMAN]	1.48621	1.40863	1.33233	1.40906
Actin-related protein 2 OS=Homo sapiens GN=ACTR2 PE=1 SV=1 - [ARP2_HUMAN]	-	1.97009	-	1.97009
Actin-related protein 2/3 complex subunit 1B OS=Homo sapiens GN=ARPC1B PE=1 SV=3 - [ARC1B_HUMAN]	-	0.812644	0.819863	0.816254
Actin-related protein 2/3 complex subunit 2 OS=Homo sapiens GN=ARPC2 PE=1 SV=1 - [ARPC2_HUMAN]	-	-	0.909116	0.909116
Actin-related protein 2/3 complex subunit 3 OS=Homo sapiens GN=ARPC3 PE=1 SV=3 - [ARPC3_HUMAN]	-	0.25184	-	0.25184
Actin-related protein 2/3 complex subunit 4 OS=Homo sapiens GN=ARPC4 PE=1 SV=3 - [ARPC4_HUMAN]	1.47934	1.70005	0.984343	1.38791
Actin-related protein 3 OS=Homo sapiens GN=ACTR3 PE=1 SV=3 - [ARP3_HUMAN]	0.962961	0.99351	0.80918	0.921884
Activating signal cointegrator 1 complex subunit 2 OS=Homo sapiens GN=ASCC2 PE=1 SV=3 - [ASCC2_HUMAN]	20.2326	-	-	20.2326
Acylamino-acid-releasing enzyme OS=Homo sapiens GN=APEH PE=1 SV=4 - [ACPH_HUMAN]	1.27196	1.63887	1.00283	1.30455
Acyl-protein thioesterase 2 OS=Homo sapiens GN=LYPLA2 PE=1 SV=1 - [LYPA2_HUMAN]	0.957657	-	-	0.957657
Adenine phosphoribosyltransferase OS=Homo sapiens GN=APRT PE=1 SV=2 - [APT_HUMAN]	2.36254	2.18313	-	2.27283
Adenosine kinase OS=Homo sapiens GN=ADK PE=1 SV=2 - [ADK_HUMAN]	0.692525	1.55682	1.28426	1.17787
Adenosylhomocysteinase OS=Homo sapiens GN=AHCY PE=1 SV=4 - [SAHH_HUMAN]	0.887397	0.801155	2.53645	1.40834
Adenylyl cyclase-associated protein 1 OS=Homo sapiens GN=CAP1 PE=1 SV=5 - [CAP1_HUMAN]	0.880891	0.908153	0.794057	0.861034
ADP/ATP translocase 2 OS=Homo sapiens GN=SLC25A5 PE=1 SV=7 - [ADT2_HUMAN]	0.70402	0.97818	1.44984	1.04401
ADP/ATP translocase 3 OS=Homo sapiens GN=SLC25A6 PE=1 SV=4 - [ADT3_HUMAN]	0.836797	-	2.13923	1.48801
ADP-ribosylation factor 3 OS=Homo sapiens GN=ARF3 PE=1 SV=2 - [ARF3_HUMAN]	2.43497	1.04174	1.39114	1.62262
ADP-ribosylation factor 4 OS=Homo sapiens GN=ARF4 PE=1 SV=3 - [ARF4_HUMAN]	0.973508	0.879289	0.706643	0.853146
A-kinase anchor protein 12 OS=Homo sapiens GN=AKAP12 PE=1 SV=4 - [AKA12_HUMAN]	1.08817	1.22829	1.33663	1.21769
A-kinase anchor protein 2 OS=Homo sapiens GN=AKAP2 PE=1 SV=3 - [AKAP2_HUMAN]	2.68315	2.31316	1.81131	2.26921
Alanine--tRNA ligase, cytoplasmic OS=Homo sapiens GN=AARS PE=1 SV=2 - [SYAC_HUMAN]	0.844303	0.800432	0.844677	0.829804
Aldose reductase OS=Homo sapiens GN=AKR1B1 PE=1 SV=3 - [ALDR_HUMAN]	0.764637	1.46314	0.771446	0.999739
Alkyldihydroxyacetonephosphate synthase, peroxisomal OS=Homo sapiens GN=AGPS PE=1 SV=1 - [ADAS_HUMAN]	-	1.51282	-	1.51282
All-trans-retinol 13,14-reductase OS=Homo sapiens GN=RETSAT PE=1 SV=2 - [RETST_HUMAN]	-	6.50251	-	6.50251
Alpha-actinin-1 OS=Homo sapiens GN=ACTN1 PE=1 SV=2 - [ACTN1_HUMAN]	0.974869	0.965835	0.96357	0.968091
Alpha-actinin-4 OS=Homo sapiens GN=ACTN4 PE=1 SV=2 - [ACTN4_HUMAN]	1	1.03756	1.06258	1.03338
Alpha-adducin OS=Homo sapiens GN=ADD1 PE=1 SV=2 - [ADDA_HUMAN]	0.538056	-	0.630312	0.584184
Alpha-aminoadipic semialdehyde synthase, mitochondrial OS=Homo sapiens GN=AASS PE=1 SV=1 - [AASS_HUMAN]	-	4.2323	-	4.2323
Alpha-centractin OS=Homo sapiens GN=ACTR1A PE=1 SV=1 - [ACTZ_HUMAN]	0.488456	0.541755	0.949123	0.659778
Alpha-enolase OS=Homo sapiens GN=ENO1 PE=1 SV=2 - [ENOA_HUMAN]	0.921639	0.95589	0.908518	0.928682
Alpha-mannosidase 2 OS=Homo sapiens GN=MAN2A1 PE=1 SV=2 - [MA2A1_HUMAN]	-	-	0.889222	0.889222
Alpha-parvin OS=Homo sapiens GN=PARVA PE=1 SV=1 - [PARVA_HUMAN]	0.709136	-	-	0.709136
Amphoterin-induced protein 2 OS=Homo sapiens GN=AMIGO2 PE=1 SV=1 - [AMGO2_HUMAN]	0.761325	-	1.76683	1.26408
Amyloid beta A4 protein OS=Homo sapiens GN=APP PE=1 SV=3 - [A4_HUMAN]	0.982346	0.969333	0.942039	0.964573
Amyloid-like protein 2 OS=Homo sapiens GN=APLP2 PE=1 SV=2 - [APLP2_HUMAN]	0.718833	0.707575	0.780584	0.735664
Anion exchange protein 2 OS=Homo sapiens GN=SLC4A2 PE=1 SV=4 - [B3A2_HUMAN]	2.30069	-	-	2.30069
Ankycorbin OS=Homo sapiens GN=RAI14 PE=1 SV=2 - [RAI14_HUMAN]	0.766255	1.04665	0.793104	0.86867
Annexin A1 OS=Homo sapiens GN=ANXA1 PE=1 SV=2 - [ANXA1_HUMAN]	0.93673	1.00055	1.08377	1.00702
Annexin A11 OS=Homo sapiens GN=ANXA11 PE=1 SV=1 - [ANX11_HUMAN]	1.82869	0.899447	1.05525	1.26113
Annexin A2 OS=Homo sapiens GN=ANXA2 PE=1 SV=2 - [ANXA2_HUMAN]	0.924935	0.955667	0.94616	0.942254
Annexin A4 OS=Homo sapiens GN=ANXA4 PE=1 SV=4 - [ANXA4_HUMAN]	0.566152	0.965207	0.842609	0.791323
Annexin A5 OS=Homo sapiens GN=ANXA5 PE=1 SV=2 - [ANXA5_HUMAN]	0.91507	0.913183	0.866877	0.898377
Annexin A6 OS=Homo sapiens GN=ANXA6 PE=1 SV=3 - [ANXA6_HUMAN]	0.951721	0.935222	0.87728	0.921408
Annexin A7 OS=Homo sapiens GN=ANXA7 PE=1 SV=3 - [ANXA7_HUMAN]	0.943493	2.0475	1.0471	1.34603
AP-1 complex subunit beta-1 OS=Homo sapiens GN=AP1B1 PE=1 SV=2 - [AP1B1_HUMAN]	0.996131	1.06104	1.31667	1.12461
AP-1 complex subunit gamma-1 OS=Homo sapiens GN=AP1G1 PE=1 SV=5 - [AP1G1_HUMAN]	0.899111	1.54095	1.18158	1.20721
AP-2 complex subunit alpha-1 OS=Homo sapiens GN=AP2A1 PE=1 SV=3 - [AP2A1_HUMAN]	1.28561	1.12593	1.05577	1.15577
AP-2 complex subunit alpha-2 OS=Homo sapiens GN=AP2A2 PE=1 SV=2 - [AP2A2_HUMAN]	1.53894	1.1871	1.905	1.54368
AP-2 complex subunit beta OS=Homo sapiens GN=AP2B1 PE=1 SV=1 - [AP2B1_HUMAN]	1.22717	1.12771	1.05996	1.13828
AP-2 complex subunit mu OS=Homo sapiens GN=AP2M1 PE=1 SV=2 - [AP2M1_HUMAN]	1.48517	-	0.990944	1.23806
AP-3 complex subunit beta-1 OS=Homo sapiens GN=AP3B1 PE=1 SV=3 - [AP3B1_HUMAN]	0.975283	0.5564	0.799364	0.777016
AP-3 complex subunit delta-1 OS=Homo sapiens GN=AP3D1 PE=1 SV=1 - [AP3D1_HUMAN]	1.46106	1.35188	1.98883	1.60059
Apolipoprotein E OS=Homo sapiens GN=APOE PE=1 SV=1 - [APOE_HUMAN]	-	-	3.49689	3.49689
Apoptosis-inducing factor 1, mitochondrial OS=Homo sapiens GN=AIFM1 PE=1 SV=1 - [AIFM1_HUMAN]	0.981752	-	-	0.981752
Arginine--tRNA ligase, cytoplasmic OS=Homo sapiens GN=RARS PE=1 SV=2 - [SYRC_HUMAN]	0.639479	1.06183	0.974364	0.891891
Asparagine--tRNA ligase, cytoplasmic OS=Homo sapiens GN=NARS PE=1 SV=1 - [SYNC_HUMAN]	0.921712	1.82025	1.28243	1.34146
Aspartate aminotransferase, mitochondrial OS=Homo sapiens GN=GOT2 PE=1 SV=3 - [AATM_HUMAN]	2.07334	1.50097	1.10794	1.56075
Aspartate--tRNA ligase, cytoplasmic OS=Homo sapiens GN=DARS PE=1 SV=2 - [SYDC_HUMAN]	-	1.22329	-	1.22329
Aspartyl/asparaginyl beta-hydroxylase OS=Homo sapiens GN=ASPH PE=1 SV=3 - [ASPH_HUMAN]	0.842276	0.997777	0.908437	0.916163
Astrocytic phosphoprotein PEA-15 OS=Homo sapiens GN=PEA15 PE=1 SV=2 - [PEA15_HUMAN]	0.826654	0.783285	0.682747	0.764229
ATP synthase subunit alpha, mitochondrial OS=Homo sapiens GN=ATP5A1 PE=1 SV=1 - [ATPA_HUMAN]	1.15258	1.03562	1.1815	1.12324
ATP synthase subunit beta, mitochondrial OS=Homo sapiens GN=ATP5B PE=1 SV=3 - [ATPB_HUMAN]	1.59616	1.49963	1.21863	1.43814
ATP synthase subunit gamma, mitochondrial OS=Homo sapiens GN=ATP5C1 PE=1 SV=1 - [ATPG_HUMAN]	-	-	1.17181	1.17181
ATPase family AAA domain-containing protein 3B OS=Homo sapiens GN=ATAD3B PE=1 SV=1 - [ATD3B_HUMAN]	-	-	0.841857	0.841857
ATP-binding cassette sub-family E member 1 OS=Homo sapiens GN=ABCE1 PE=1 SV=1 - [ABCE1_HUMAN]	0.72358	-	-	0.72358
ATP-binding cassette sub-family F member 1 OS=Homo sapiens GN=ABCF1 PE=1 SV=2 - [ABCF1_HUMAN]	0.783415	1.08955	1.03114	0.968035
ATP-citrate synthase OS=Homo sapiens GN=ACLY PE=1 SV=3 - [ACLY_HUMAN]	1.02288	1.04178	0.978637	1.01443
ATP-dependent RNA helicase A OS=Homo sapiens GN=DHX9 PE=1 SV=4 - [DHX9_HUMAN]	0.846628	0.924722	0.877539	0.882963
ATP-dependent RNA helicase DDX1 OS=Homo sapiens GN=DDX1 PE=1 SV=2 - [DDX1_HUMAN]	0.850343	0.877745	0.763681	0.83059
ATP-dependent RNA helicase DDX3X OS=Homo sapiens GN=DDX3X PE=1 SV=3 - [DDX3X_HUMAN]	0.864648	0.631552	0.680197	0.725466
ATP-dependent RNA helicase DHX29 OS=Homo sapiens GN=DHX29 PE=1 SV=2 - [DHX29_HUMAN]	-	0.556818	-	0.556818
BAG family molecular chaperone regulator 3 OS=Homo sapiens GN=BAG3 PE=1 SV=3 - [BAG3_HUMAN]	-	-	0.522574	0.522574
Band 4.1-like protein 2 OS=Homo sapiens GN=EPB41L2 PE=1 SV=1 - [E41L2_HUMAN]	0.139964	-	-	0.139964
Basigin OS=Homo sapiens GN=BSG PE=1 SV=2 - [BASI_HUMAN]	0.911401	0.830874	2.40149	1.38126
Bcl-2-associated transcription factor 1 OS=Homo sapiens GN=BCLAF1 PE=1 SV=2 - [BCLF1_HUMAN]	-	0.996715	-	0.996715
Beta-actin-like protein 2 OS=Homo sapiens GN=ACTBL2 PE=1 SV=2 - [ACTBL_HUMAN]	0.946074	1.01012	0.905686	0.953961
Bifunctional 3'-phosphoadenosine 5'-phosphosulfate synthase 2 OS=Homo sapiens GN=PAPSS2 PE=1 SV=2 - [PAPS2_HUMAN]	1.63942	0.42169	1.76193	1.27435
Bifunctional glutamate/proline--tRNA ligase OS=Homo sapiens GN=EPRS PE=1 SV=5 - [SYEP_HUMAN]	0.902382	0.961231	0.883596	0.915736
Bifunctional purine biosynthesis protein PURH OS=Homo sapiens GN=ATIC PE=1 SV=3 - [PUR9_HUMAN]	1.3283	1.26377	1.3579	1.31666
Brain acid soluble protein 1 OS=Homo sapiens GN=BASP1 PE=1 SV=2 - [BASP1_HUMAN]	2.82225	1.90773	2.62811	2.4527
Brain protein I3 OS=Homo sapiens GN=BRI3 PE=2 SV=1 - [BRI3_HUMAN]	1.80754	-	-	1.80754
C-1-tetrahydrofolate synthase, cytoplasmic OS=Homo sapiens GN=MTHFD1 PE=1 SV=3 - [C1TC_HUMAN]	1.21647	1.09582	1.14617	1.15282
CAD protein OS=Homo sapiens GN=CAD PE=1 SV=3 - [PYR1_HUMAN]	1.02681	3.3078	0.820263	1.71829
Calcium-activated potassium channel subunit alpha-1 OS=Homo sapiens GN=KCNMA1 PE=1 SV=2 - [KCMA1_HUMAN]	1.57442	-	0.258472	0.916447
Calcium-binding and coiled-coil domain-containing protein 1 OS=Homo sapiens GN=CALCOCO1 PE=1 SV=2 - [CACO1_HUMAN]	1.58658	2.397	1.30804	1.76387
Calcium-transporting ATPase type 2C member 1 OS=Homo sapiens GN=ATP2C1 PE=1 SV=3 - [AT2C1_HUMAN]	0.602134	-	0.480769	0.541452
Caldesmon OS=Homo sapiens GN=CALD1 PE=1 SV=3 - [CALD1_HUMAN]	1.54514	1.21794	1.60032	1.45447
Calmodulin OS=Homo sapiens GN=CALM1 PE=1 SV=2 - [CALM_HUMAN]	1.12096	0.962534	0.762572	0.94869
Calnexin OS=Homo sapiens GN=CANX PE=1 SV=2 - [CALX_HUMAN]	1.47045	1.42515	1.22898	1.37486
Calpain small subunit 1 OS=Homo sapiens GN=CAPNS1 PE=1 SV=1 - [CPNS1_HUMAN]	2.54392	1.05978	-	1.80185
Calpain-1 catalytic subunit OS=Homo sapiens GN=CAPN1 PE=1 SV=1 - [CAN1_HUMAN]	1.41047	1.24255	1.37878	1.34393
Calpain-2 catalytic subunit OS=Homo sapiens GN=CAPN2 PE=1 SV=6 - [CAN2_HUMAN]	1.23635	1.11139	1.19644	1.18139
Calpastatin OS=Homo sapiens GN=CAST PE=1 SV=4 - [ICAL_HUMAN]	1.50603	1.76544	2.06976	1.78041
Calponin-2 OS=Homo sapiens GN=CNN2 PE=1 SV=4 - [CNN2_HUMAN]	6.53148	-	-	6.53148
Calponin-3 OS=Homo sapiens GN=CNN3 PE=1 SV=1 - [CNN3_HUMAN]	0.973445	0.947047	0.831793	0.917428
Calreticulin OS=Homo sapiens GN=CALR PE=1 SV=1 - [CALR_HUMAN]	1.65544	1.5437	1.33635	1.51183
Calumenin OS=Homo sapiens GN=CALU PE=1 SV=2 - [CALU_HUMAN]	1.14907	1.02762	0.898145	1.02494
cAMP-dependent protein kinase type I-alpha regulatory subunit OS=Homo sapiens GN=PRKAR1A PE=1 SV=1 - [KAP0_HUMAN]	1.72622	1.82765	1.22779	1.59389
Caprin-1 OS=Homo sapiens GN=CAPRIN1 PE=1 SV=2 - [CAPR1_HUMAN]	0.558097	0.838578	0.590204	0.662293
Carbonyl reductase [NADPH] 1 OS=Homo sapiens GN=CBR1 PE=1 SV=3 - [CBR1_HUMAN]	-	-	1.2452	1.2452
Carnitine O-palmitoyltransferase 1, liver isoform OS=Homo sapiens GN=CPT1A PE=1 SV=2 - [CPT1A_HUMAN]	0.686027	0.828745	1.35727	0.957346
Catalase OS=Homo sapiens GN=CAT PE=1 SV=3 - [CATA_HUMAN]	0.45079	-	-	0.45079
Catenin alpha-1 OS=Homo sapiens GN=CTNNA1 PE=1 SV=1 - [CTNA1_HUMAN]	0.815071	0.778888	0.717517	0.770492
Catenin beta-1 OS=Homo sapiens GN=CTNNB1 PE=1 SV=1 - [CTNB1_HUMAN]	1.75046	2.18747	1.8185	1.91881
Catenin delta-1 OS=Homo sapiens GN=CTNND1 PE=1 SV=1 - [CTND1_HUMAN]	0.889453	1.95878	1.41108	1.41977
Cathepsin D OS=Homo sapiens GN=CTSD PE=1 SV=1 - [CATD_HUMAN]	1.14364	0.972467	1.02263	1.04625
Cation-dependent mannose-6-phosphate receptor OS=Homo sapiens GN=M6PR PE=1 SV=1 - [MPRD_HUMAN]	0.861216	1.51249	1.22788	1.20053
Cation-independent mannose-6-phosphate receptor OS=Homo sapiens GN=IGF2R PE=1 SV=3 - [MPRI_HUMAN]	1.04559	1.03843	1.06814	1.05072
Caveolin-1 OS=Homo sapiens GN=CAV1 PE=1 SV=4 - [CAV1_HUMAN]	1.29189	1.20707	1.19735	1.23211
CD151 antigen OS=Homo sapiens GN=CD151 PE=1 SV=3 - [CD151_HUMAN]	0.714362	0.709463	0.665653	0.696493
CD166 antigen OS=Homo sapiens GN=ALCAM PE=1 SV=2 - [CD166_HUMAN]	1.22933	1.07086	0.996365	1.09885
CD276 antigen OS=Homo sapiens GN=CD276 PE=1 SV=1 - [CD276_HUMAN]	2.27675	-	-	2.27675
CD44 antigen OS=Homo sapiens GN=CD44 PE=1 SV=3 - [CD44_HUMAN]	0.694447	0.717511	0.691932	0.701297
CD59 glycoprotein OS=Homo sapiens GN=CD59 PE=1 SV=1 - [CD59_HUMAN]	0.938422	0.96907	0.967179	0.958224
CD63 antigen OS=Homo sapiens GN=CD63 PE=1 SV=2 - [CD63_HUMAN]	0.555589	1.06348	1.41513	1.0114
CD81 antigen OS=Homo sapiens GN=CD81 PE=1 SV=1 - [CD81_HUMAN]	1.10531	1.42458	-	1.26494
Cell cycle and apoptosis regulator protein 2 OS=Homo sapiens GN=CCAR2 PE=1 SV=2 - [CCAR2_HUMAN]	0.897638	1.0904	1.10592	1.03132
Cell division control protein 42 homolog OS=Homo sapiens GN=CDC42 PE=1 SV=2 - [CDC42_HUMAN]	-	-	1.18747	1.18747
Centrosomal protein of 170 kDa OS=Homo sapiens GN=CEP170 PE=1 SV=1 - [CE170_HUMAN]	0.771866	-	0.835671	0.803768
Chloride intracellular channel protein 1 OS=Homo sapiens GN=CLIC1 PE=1 SV=4 - [CLIC1_HUMAN]	1.1275	1.23867	1.10725	1.15781
Chloride intracellular channel protein 4 OS=Homo sapiens GN=CLIC4 PE=1 SV=4 - [CLIC4_HUMAN]	-	2.22723	1.15892	1.69308
Citrate synthase, mitochondrial OS=Homo sapiens GN=CS PE=1 SV=2 - [CISY_HUMAN]	-	1.67179	0.908192	1.28999
Clathrin heavy chain 1 OS=Homo sapiens GN=CLTC PE=1 SV=5 - [CLH1_HUMAN]	0.920029	0.964867	0.95999	0.948295
Cleavage and polyadenylation specificity factor subunit 6 OS=Homo sapiens GN=CPSF6 PE=1 SV=2 - [CPSF6_HUMAN]	0.553165	0.742946	1.95068	1.08226
Cleft lip and palate transmembrane protein 1 OS=Homo sapiens GN=CLPTM1 PE=1 SV=1 - [CLPT1_HUMAN]	1.67352	1.39571	1.50738	1.52554
Coactosin-like protein OS=Homo sapiens GN=COTL1 PE=1 SV=3 - [COTL1_HUMAN]	1.12949	0.912204	1.0922	1.04463
Coatomer subunit alpha OS=Homo sapiens GN=COPA PE=1 SV=2 - [COPA_HUMAN]	0.869612	0.967252	0.883468	0.906777
Coatomer subunit beta OS=Homo sapiens GN=COPB1 PE=1 SV=3 - [COPB_HUMAN]	1.08819	0.89304	1.3614	1.11421
Coatomer subunit beta' OS=Homo sapiens GN=COPB2 PE=1 SV=2 - [COPB2_HUMAN]	0.874489	0.983788	1.03464	0.964304
Coatomer subunit delta OS=Homo sapiens GN=ARCN1 PE=1 SV=1 - [COPD_HUMAN]	-	-	1.12834	1.12834
Coatomer subunit gamma-1 OS=Homo sapiens GN=COPG1 PE=1 SV=1 - [COPG1_HUMAN]	1.41505	1.16367	1.19806	1.25892
Cofilin-1 OS=Homo sapiens GN=CFL1 PE=1 SV=3 - [COF1_HUMAN]	0.981023	1.37034	1.15345	1.16827
Cold shock domain-containing protein E1 OS=Homo sapiens GN=CSDE1 PE=1 SV=2 - [CSDE1_HUMAN]	0.708156	1.12847	1.58855	1.14173
Complement decay-accelerating factor OS=Homo sapiens GN=CD55 PE=1 SV=4 - [DAF_HUMAN]	0.671761	-	-	0.671761
Condensin complex subunit 1 OS=Homo sapiens GN=NCAPD2 PE=1 SV=3 - [CND1_HUMAN]	1.13613	-	-	1.13613
Connective tissue growth factor OS=Homo sapiens GN=CTGF PE=1 SV=2 - [CTGF_HUMAN]	-	0.548087	-	0.548087
Constitutive coactivator of PPAR-gamma-like protein 1 OS=Homo sapiens GN=FAM120A PE=1 SV=2 - [F120A_HUMAN]	1.32528	1.5456	1.04514	1.30534
Copine-1 OS=Homo sapiens GN=CPNE1 PE=1 SV=1 - [CPNE1_HUMAN]	1.17065	1.41047	3.54752	2.04288
Copine-3 OS=Homo sapiens GN=CPNE3 PE=1 SV=1 - [CPNE3_HUMAN]	0.640283	1.00165	0.964809	0.868913
Coronin-1B OS=Homo sapiens GN=CORO1B PE=1 SV=1 - [COR1B_HUMAN]	1.04312	1.42909	1.1277	1.19997
Coronin-1C OS=Homo sapiens GN=CORO1C PE=1 SV=1 - [COR1C_HUMAN]	0.99106	0.976358	1.08935	1.01892
CTP synthase 1 OS=Homo sapiens GN=CTPS1 PE=1 SV=2 - [PYRG1_HUMAN]	-	-	2.57493	2.57493
Cullin-2 OS=Homo sapiens GN=CUL2 PE=1 SV=2 - [CUL2_HUMAN]	0.772496	-	-	0.772496
Cullin-4B OS=Homo sapiens GN=CUL4B PE=1 SV=4 - [CUL4B_HUMAN]	0.868887	0.765249	0.88454	0.839559
Cullin-associated NEDD8-dissociated protein 1 OS=Homo sapiens GN=CAND1 PE=1 SV=2 - [CAND1_HUMAN]	0.922396	0.869379	0.941887	0.911221
Cystatin-B OS=Homo sapiens GN=CSTB PE=1 SV=2 - [CYTB_HUMAN]	0.84553	-	1.05199	0.948759
Cysteine and glycine-rich protein 1 OS=Homo sapiens GN=CSRP1 PE=1 SV=3 - [CSRP1_HUMAN]	-	0.643551	0.689476	0.666513
Cysteine-rich motor neuron 1 protein OS=Homo sapiens GN=CRIM1 PE=1 SV=1 - [CRIM1_HUMAN]	1.24381	0.877553	0.984939	1.03544
Cytochrome b-c1 complex subunit 2, mitochondrial OS=Homo sapiens GN=UQCRC2 PE=1 SV=3 - [QCR2_HUMAN]	-	1.83322	1.30263	1.56792
Cytochrome c OS=Homo sapiens GN=CYCS PE=1 SV=2 - [CYC_HUMAN]	0.906622	0.833226	0.88676	0.875536
Cytoplasmic aconitate hydratase OS=Homo sapiens GN=ACO1 PE=1 SV=3 - [ACOC_HUMAN]	1.26268	1.61213	1.50146	1.45876
Cytoplasmic dynein 1 heavy chain 1 OS=Homo sapiens GN=DYNC1H1 PE=1 SV=5 - [DYHC1_HUMAN]	1.00354	0.967887	0.963481	0.978302
Cytoplasmic dynein 1 intermediate chain 2 OS=Homo sapiens GN=DYNC1I2 PE=1 SV=3 - [DC1I2_HUMAN]	0.765721	0.975085	0.906093	0.8823
Cytoplasmic FMR1-interacting protein 1 OS=Homo sapiens GN=CYFIP1 PE=1 SV=1 - [CYFP1_HUMAN]	0.955701	0.900278	0.724222	0.860067
Cytoskeleton-associated protein 4 OS=Homo sapiens GN=CKAP4 PE=1 SV=2 - [CKAP4_HUMAN]	0.906858	0.908178	0.809945	0.874994
Cytoskeleton-associated protein 5 OS=Homo sapiens GN=CKAP5 PE=1 SV=3 - [CKAP5_HUMAN]	0.803609	0.907537	-	0.855573
Cytosolic acyl coenzyme A thioester hydrolase OS=Homo sapiens GN=ACOT7 PE=1 SV=3 - [BACH_HUMAN]	0.905518	-	-	0.905518
Cytosolic non-specific dipeptidase OS=Homo sapiens GN=CNDP2 PE=1 SV=2 - [CNDP2_HUMAN]	-	-	6.52662	6.52662
D-3-phosphoglycerate dehydrogenase OS=Homo sapiens GN=PHGDH PE=1 SV=4 - [SERA_HUMAN]	0.716634	0.510023	0.427225	0.551294
Delta and Notch-like epidermal growth factor-related receptor OS=Homo sapiens GN=DNER PE=1 SV=1 - [DNER_HUMAN]	0.792082	0.696608	0.677712	0.722134
Delta(24)-sterol reductase OS=Homo sapiens GN=DHCR24 PE=1 SV=2 - [DHC24_HUMAN]	2.20147	1.21366	-	1.70757
Delta-1-pyrroline-5-carboxylate synthase OS=Homo sapiens GN=ALDH18A1 PE=1 SV=2 - [P5CS_HUMAN]	1.28518	1.68848	1.86137	1.61168
Desmoglein-2 OS=Homo sapiens GN=DSG2 PE=1 SV=2 - [DSG2_HUMAN]	1.60345	0.564791	0.492637	0.886961
Destrin OS=Homo sapiens GN=DSTN PE=1 SV=3 - [DEST_HUMAN]	0.726551	0.813006	0.650652	0.73007
Dihydrolipoyllysine-residue succinyltransferase component of 2-oxoglutarate dehydrogenase complex, mitochondrial OS=Homo sapiens GN=DLST PE=1 SV=4 - [ODO2_HUMAN]	-	0.70631	-	0.70631
Dihydropyrimidinase-related protein 2 OS=Homo sapiens GN=DPYSL2 PE=1 SV=1 - [DPYL2_HUMAN]	0.893616	1.02405	0.883903	0.933857
Dihydropyrimidinase-related protein 3 OS=Homo sapiens GN=DPYSL3 PE=1 SV=1 - [DPYL3_HUMAN]	0.738611	-	-	0.738611
Dipeptidyl peptidase 3 OS=Homo sapiens GN=DPP3 PE=1 SV=2 - [DPP3_HUMAN]	1.077	0.991736	1.03408	1.03427
Dipeptidyl peptidase 9 OS=Homo sapiens GN=DPP9 PE=1 SV=3 - [DPP9_HUMAN]	-	0.993396	-	0.993396
Disabled homolog 2 OS=Homo sapiens GN=DAB2 PE=1 SV=3 - [DAB2_HUMAN]	-	-	0.815996	0.815996
Discoidin domain-containing receptor 2 OS=Homo sapiens GN=DDR2 PE=1 SV=2 - [DDR2_HUMAN]	0.75928	0.609824	-	0.684552
Discoidin, CUB and LCCL domain-containing protein 2 OS=Homo sapiens GN=DCBLD2 PE=1 SV=1 - [DCBD2_HUMAN]	0.843333	0.763055	0.727494	0.777961
Disintegrin and metalloproteinase domain-containing protein 9 OS=Homo sapiens GN=ADAM9 PE=1 SV=1 - [ADAM9_HUMAN]	0.946246	1.3316	1.03081	1.10288
Disks large homolog 1 OS=Homo sapiens GN=DLG1 PE=1 SV=2 - [DLG1_HUMAN]	1.28588	0.813727	0.791581	0.963728
DNA damage-binding protein 1 OS=Homo sapiens GN=DDB1 PE=1 SV=1 - [DDB1_HUMAN]	0.66462	0.763812	0.902547	0.776993
DNA replication licensing factor MCM2 OS=Homo sapiens GN=MCM2 PE=1 SV=4 - [MCM2_HUMAN]	-	-	0.224817	0.224817
DNA topoisomerase 1 OS=Homo sapiens GN=TOP1 PE=1 SV=2 - [TOP1_HUMAN]	1.00786	0.720757	0.979821	0.902814
DNA-dependent protein kinase catalytic subunit OS=Homo sapiens GN=PRKDC PE=1 SV=3 - [PRKDC_HUMAN]	0.880211	0.883649	0.813526	0.859129
DnaJ homolog subfamily A member 1 OS=Homo sapiens GN=DNAJA1 PE=1 SV=2 - [DNJA1_HUMAN]	0.421054	0.339185	0.464875	0.408371
DnaJ homolog subfamily A member 2 OS=Homo sapiens GN=DNAJA2 PE=1 SV=1 - [DNJA2_HUMAN]	0.596453	0.640871	0.569506	0.602277
DnaJ homolog subfamily C member 10 OS=Homo sapiens GN=DNAJC10 PE=1 SV=2 - [DJC10_HUMAN]	1.4202	1.13946	-	1.27983
Dolichyl-diphosphooligosaccharide--protein glycosyltransferase 48 kDa subunit OS=Homo sapiens GN=DDOST PE=1 SV=4 - [OST48_HUMAN]	1.5637	1.549	1.30178	1.47149
Dolichyl-diphosphooligosaccharide--protein glycosyltransferase subunit 1 OS=Homo sapiens GN=RPN1 PE=1 SV=1 - [RPN1_HUMAN]	1.13162	1.17458	1.11118	1.13913
Dolichyl-diphosphooligosaccharide--protein glycosyltransferase subunit 2 OS=Homo sapiens GN=RPN2 PE=1 SV=3 - [RPN2_HUMAN]	1.08336	1.24193	1.20798	1.17776
Dolichyl-diphosphooligosaccharide--protein glycosyltransferase subunit STT3A OS=Homo sapiens GN=STT3A PE=1 SV=2 - [STT3A_HUMAN]	1.06797	1.09705	1.05136	1.07213
Dolichyl-diphosphooligosaccharide--protein glycosyltransferase subunit STT3B OS=Homo sapiens GN=STT3B PE=1 SV=1 - [STT3B_HUMAN]	-	-	1.76704	1.76704
Double-stranded RNA-specific adenosine deaminase OS=Homo sapiens GN=ADAR PE=1 SV=4 - [DSRAD_HUMAN]	0.593207	-	-	0.593207
Drebrin OS=Homo sapiens GN=DBN1 PE=1 SV=4 - [DREB_HUMAN]	1.16601	1.10317	1.17864	1.14928
Drebrin-like protein OS=Homo sapiens GN=DBNL PE=1 SV=1 - [DBNL_HUMAN]	2.83897	0.912462	0.947794	1.56641
Dynactin subunit 1 OS=Homo sapiens GN=DCTN1 PE=1 SV=3 - [DCTN1_HUMAN]	0.944916	1.16398	0.81468	0.974526
Dynactin subunit 2 OS=Homo sapiens GN=DCTN2 PE=1 SV=4 - [DCTN2_HUMAN]	-	-	1.91326	1.91326
Dynamin-1-like protein OS=Homo sapiens GN=DNM1L PE=1 SV=2 - [DNM1L_HUMAN]	1.10249	0.547395	-	0.824943
Dynamin-2 OS=Homo sapiens GN=DNM2 PE=1 SV=2 - [DYN2_HUMAN]	2.52829	-	0.625835	1.57706
Dynamin-binding protein OS=Homo sapiens GN=DNMBP PE=1 SV=1 - [DNMBP_HUMAN]	-	-	1.45927	1.45927
Dysferlin OS=Homo sapiens GN=DYSF PE=1 SV=1 - [DYSF_HUMAN]	1.14047	1.19103	1.62915	1.32022
Dystonin OS=Homo sapiens GN=DST PE=1 SV=4 - [DYST_HUMAN]	1.02531	-	-	1.02531
E3 SUMO-protein ligase RanBP2 OS=Homo sapiens GN=RANBP2 PE=1 SV=2 - [RBP2_HUMAN]	-	-	1.02009	1.02009
E3 ubiquitin/ISG15 ligase TRIM25 OS=Homo sapiens GN=TRIM25 PE=1 SV=2 - [TRI25_HUMAN]	-	0.995846	1.28535	1.1406
E3 ubiquitin-protein ligase HUWE1 OS=Homo sapiens GN=HUWE1 PE=1 SV=3 - [HUWE1_HUMAN]	2.15634	0.605314	2.14433	1.63533
E3 ubiquitin-protein ligase MYLIP OS=Homo sapiens GN=MYLIP PE=1 SV=2 - [MYLIP_HUMAN]	0.631706	-	-	0.631706
E3 ubiquitin-protein ligase UBR4 OS=Homo sapiens GN=UBR4 PE=1 SV=1 - [UBR4_HUMAN]	1.72396	3.21676	-	2.47036
Early endosome antigen 1 OS=Homo sapiens GN=EEA1 PE=1 SV=2 - [EEA1_HUMAN]	1.08266	1.07871	0.968452	1.04327
Ectopic P granules protein 5 homolog OS=Homo sapiens GN=EPG5 PE=2 SV=2 - [EPG5_HUMAN]	-	1.62851	-	1.62851
EH domain-containing protein 1 OS=Homo sapiens GN=EHD1 PE=1 SV=2 - [EHD1_HUMAN]	5.17712	-	-	5.17712
Electron transfer flavoprotein subunit alpha, mitochondrial OS=Homo sapiens GN=ETFA PE=1 SV=1 - [ETFA_HUMAN]	1.29861	-	-	1.29861
Elongation factor 1-alpha 1 OS=Homo sapiens GN=EEF1A1 PE=1 SV=1 - [EF1A1_HUMAN]	1.54767	1.35011	1.28191	1.39323
Elongation factor 1-beta OS=Homo sapiens GN=EEF1B2 PE=1 SV=3 - [EF1B_HUMAN]	2.27085	1.4366	1.76132	1.82292
Elongation factor 1-delta OS=Homo sapiens GN=EEF1D PE=1 SV=5 - [EF1D_HUMAN]	0.690625	1.10879	0.893469	0.897628
Elongation factor 1-gamma OS=Homo sapiens GN=EEF1G PE=1 SV=3 - [EF1G_HUMAN]	0.972989	0.999797	0.870141	0.947642
Elongation factor 2 OS=Homo sapiens GN=EEF2 PE=1 SV=4 - [EF2_HUMAN]	0.924939	1.02674	0.967634	0.973105
Elongation factor Tu GTP-binding domain-containing protein 1 OS=Homo sapiens GN=EFTUD1 PE=1 SV=2 - [ETUD1_HUMAN]	0.233918	-	-	0.233918
Elongation factor Tu, mitochondrial OS=Homo sapiens GN=TUFM PE=1 SV=2 - [EFTU_HUMAN]	0.83089	0.801012	-	0.815951
Endoplasmic reticulum aminopeptidase 1 OS=Homo sapiens GN=ERAP1 PE=1 SV=3 - [ERAP1_HUMAN]	2.48304	1.65341	1.92598	2.02081
Endoplasmic reticulum mannosyl-oligosaccharide 1,2-alpha-mannosidase OS=Homo sapiens GN=MAN1B1 PE=1 SV=2 - [MA1B1_HUMAN]	0.533017	1.80299	-	1.168
Endoplasmin OS=Homo sapiens GN=HSP90B1 PE=1 SV=1 - [ENPL_HUMAN]	0.920044	0.974819	0.901167	0.93201
Endothelin-converting enzyme 1 OS=Homo sapiens GN=ECE1 PE=1 SV=2 - [ECE1_HUMAN]	1.54811	0.951652	1.03279	1.17752
Enhancer of mRNA-decapping protein 4 OS=Homo sapiens GN=EDC4 PE=1 SV=1 - [EDC4_HUMAN]	1.3617	0.304662	0.775716	0.814027
Enoyl-CoA hydratase, mitochondrial OS=Homo sapiens GN=ECHS1 PE=1 SV=4 - [ECHM_HUMAN]	-	1.46262	1.39905	1.43083
Ephrin type-A receptor 2 OS=Homo sapiens GN=EPHA2 PE=1 SV=2 - [EPHA2_HUMAN]	1.01504	0.86655	0.727316	0.869637
Epidermal growth factor receptor OS=Homo sapiens GN=EGFR PE=1 SV=2 - [EGFR_HUMAN]	1.05151	0.697924	0.632134	0.793857
ER lumen protein retaining receptor 2 OS=Homo sapiens GN=KDELR2 PE=1 SV=1 - [ERD22_HUMAN]	-	0.674327	-	0.674327
Erlin-2 OS=Homo sapiens GN=ERLIN2 PE=1 SV=1 - [ERLN2_HUMAN]	-	1.25918	1.45205	1.35561
ERO1-like protein alpha OS=Homo sapiens GN=ERO1L PE=1 SV=2 - [ERO1A_HUMAN]	1.83838	1.20412	0.964552	1.33569
Estradiol 17-beta-dehydrogenase 12 OS=Homo sapiens GN=HSD17B12 PE=1 SV=2 - [DHB12_HUMAN]	2.05544	-	2.61196	2.3337
Eukaryotic initiation factor 4A-I OS=Homo sapiens GN=EIF4A1 PE=1 SV=1 - [IF4A1_HUMAN]	0.768488	0.850944	0.944425	0.854619
Eukaryotic peptide chain release factor GTP-binding subunit ERF3A OS=Homo sapiens GN=GSPT1 PE=1 SV=1 - [ERF3A_HUMAN]	0.564234	0.5787	0.532528	0.558487
Eukaryotic translation initiation factor 2 subunit 1 OS=Homo sapiens GN=EIF2S1 PE=1 SV=3 - [IF2A_HUMAN]	-	2.27063	2.07436	2.1725
Eukaryotic translation initiation factor 2 subunit 3 OS=Homo sapiens GN=EIF2S3 PE=1 SV=3 - [IF2G_HUMAN]	3.20264	3.00035	1.13854	2.44718
Eukaryotic translation initiation factor 3 subunit A OS=Homo sapiens GN=EIF3A PE=1 SV=1 - [EIF3A_HUMAN]	0.869558	0.849648	0.81768	0.845628
Eukaryotic translation initiation factor 3 subunit B OS=Homo sapiens GN=EIF3B PE=1 SV=3 - [EIF3B_HUMAN]	0.846809	0.864514	0.499348	0.73689
Eukaryotic translation initiation factor 3 subunit C OS=Homo sapiens GN=EIF3C PE=1 SV=1 - [EIF3C_HUMAN]	0.897707	1.06916	0.822288	0.929718
Eukaryotic translation initiation factor 3 subunit D OS=Homo sapiens GN=EIF3D PE=1 SV=1 - [EIF3D_HUMAN]	-	0.254705	-	0.254705
Eukaryotic translation initiation factor 3 subunit F OS=Homo sapiens GN=EIF3F PE=1 SV=1 - [EIF3F_HUMAN]	-	0.809515	1.02669	0.918102
Eukaryotic translation initiation factor 3 subunit L OS=Homo sapiens GN=EIF3L PE=1 SV=1 - [EIF3L_HUMAN]	1.20101	1.11355	-	1.15728
Eukaryotic translation initiation factor 4 gamma 1 OS=Homo sapiens GN=EIF4G1 PE=1 SV=4 - [IF4G1_HUMAN]	1.25486	0.93079	1.10745	1.0977
Eukaryotic translation initiation factor 4 gamma 2 OS=Homo sapiens GN=EIF4G2 PE=1 SV=1 - [IF4G2_HUMAN]	0.414859	0.50821	0.319784	0.414284
Eukaryotic translation initiation factor 4B OS=Homo sapiens GN=EIF4B PE=1 SV=2 - [IF4B_HUMAN]	0.9925	-	-	0.9925
Eukaryotic translation initiation factor 5A-1 OS=Homo sapiens GN=EIF5A PE=1 SV=2 - [IF5A1_HUMAN]	0.832079	0.70201	0.892982	0.809023
Eukaryotic translation initiation factor 5B OS=Homo sapiens GN=EIF5B PE=1 SV=4 - [IF2P_HUMAN]	1.07823	0.983245	1.0235	1.02832
Exocyst complex component 1 OS=Homo sapiens GN=EXOC1 PE=1 SV=4 - [EXOC1_HUMAN]	1.2641	-	-	1.2641
Exocyst complex component 2 OS=Homo sapiens GN=EXOC2 PE=1 SV=1 - [EXOC2_HUMAN]	3.23816	-	-	3.23816
Exocyst complex component 4 OS=Homo sapiens GN=EXOC4 PE=1 SV=1 - [EXOC4_HUMAN]	1.11955	-	-	1.11955
Exportin-1 OS=Homo sapiens GN=XPO1 PE=1 SV=1 - [XPO1_HUMAN]	0.620218	0.727484	0.692729	0.680144
Exportin-2 OS=Homo sapiens GN=CSE1L PE=1 SV=3 - [XPO2_HUMAN]	0.821175	0.732453	0.737564	0.763731
Extended synaptotagmin-1 OS=Homo sapiens GN=ESYT1 PE=1 SV=1 - [ESYT1_HUMAN]	1.6946	1.44223	1.75193	1.62959
Extended synaptotagmin-2 OS=Homo sapiens GN=ESYT2 PE=1 SV=1 - [ESYT2_HUMAN]	-	0.895529	-	0.895529
Ezrin OS=Homo sapiens GN=EZR PE=1 SV=4 - [EZRI_HUMAN]	0.86213	0.813095	0.814277	0.829834
FACT complex subunit SPT16 OS=Homo sapiens GN=SUPT16H PE=1 SV=1 - [SP16H_HUMAN]	0.464967	0.928249	-	0.696608
F-actin-capping protein subunit alpha-1 OS=Homo sapiens GN=CAPZA1 PE=1 SV=3 - [CAZA1_HUMAN]	0.971307	1.15737	0.755316	0.96133
F-actin-capping protein subunit beta OS=Homo sapiens GN=CAPZB PE=1 SV=4 - [CAPZB_HUMAN]	5.44388	1.61281	-	3.52834
Far upstream element-binding protein 2 OS=Homo sapiens GN=KHSRP PE=1 SV=4 - [FUBP2_HUMAN]	1.13571	1.078	1.03097	1.08156
Farnesyl pyrophosphate synthase OS=Homo sapiens GN=FDPS PE=1 SV=4 - [FPPS_HUMAN]	0.933287	-	-	0.933287
Fascin OS=Homo sapiens GN=FSCN1 PE=1 SV=3 - [FSCN1_HUMAN]	0.769042	0.807291	0.771193	0.782509
Fatty acid synthase OS=Homo sapiens GN=FASN PE=1 SV=3 - [FAS_HUMAN]	0.99942	1.04742	1.00769	1.01818
Fermitin family homolog 2 OS=Homo sapiens GN=FERMT2 PE=1 SV=1 - [FERM2_HUMAN]	0.898263	0.812096	0.951472	0.887277
Ferritin heavy chain OS=Homo sapiens GN=FTH1 PE=1 SV=2 - [FRIH_HUMAN]	1.14955	1.25624	1.18609	1.1973
Ferritin light chain OS=Homo sapiens GN=FTL PE=1 SV=2 - [FRIL_HUMAN]	1.53268	0.875288	1.68233	1.36343
Fibronectin OS=Homo sapiens GN=FN1 PE=1 SV=4 - [FINC_HUMAN]	1.20973	1.04961	0.98158	1.08031
Filamin-A OS=Homo sapiens GN=FLNA PE=1 SV=4 - [FLNA_HUMAN]	1.21047	1.21849	1.20839	1.21245
Filamin-B OS=Homo sapiens GN=FLNB PE=1 SV=2 - [FLNB_HUMAN]	1.03565	1.18369	1.02996	1.0831
Filamin-C OS=Homo sapiens GN=FLNC PE=1 SV=3 - [FLNC_HUMAN]	1.21879	1.24925	1.22255	1.2302
Flotillin-1 OS=Homo sapiens GN=FLOT1 PE=1 SV=3 - [FLOT1_HUMAN]	0.794817	0.764867	0.937003	0.832229
Fragile X mental retardation syndrome-related protein 1 OS=Homo sapiens GN=FXR1 PE=1 SV=3 - [FXR1_HUMAN]	-	-	0.630283	0.630283
Fructose-bisphosphate aldolase A OS=Homo sapiens GN=ALDOA PE=1 SV=2 - [ALDOA_HUMAN]	0.959295	0.796681	0.800383	0.85212
Fructose-bisphosphate aldolase C OS=Homo sapiens GN=ALDOC PE=1 SV=2 - [ALDOC_HUMAN]	1.3054	1.22839	1.78615	1.43998
Galectin-1 OS=Homo sapiens GN=LGALS1 PE=1 SV=2 - [LEG1_HUMAN]	0.848693	0.877751	1.17913	0.968525
Gamma-interferon-inducible protein 16 OS=Homo sapiens GN=IFI16 PE=1 SV=3 - [IF16_HUMAN]	1.24497	-	-	1.24497
Gap junction alpha-1 protein OS=Homo sapiens GN=GJA1 PE=1 SV=2 - [CXA1_HUMAN]	-	0.697006	-	0.697006
Gelsolin OS=Homo sapiens GN=GSN PE=1 SV=1 - [GELS_HUMAN]	1.27205	1.64675	1.02538	1.31473
General vesicular transport factor p115 OS=Homo sapiens GN=USO1 PE=1 SV=2 - [USO1_HUMAN]	0.886826	0.909853	0.934923	0.910534
Glucose-6-phosphate 1-dehydrogenase OS=Homo sapiens GN=G6PD PE=1 SV=4 - [G6PD_HUMAN]	1.10935	1.41232	0.96432	1.162
Glucose-6-phosphate isomerase OS=Homo sapiens GN=GPI PE=1 SV=4 - [G6PI_HUMAN]	0.88852	1.02276	0.910357	0.940545
Glucosidase 2 subunit beta OS=Homo sapiens GN=PRKCSH PE=1 SV=2 - [GLU2B_HUMAN]	0.889062	0.990165	0.823995	0.901074
Glucosylceramidase OS=Homo sapiens GN=GBA PE=1 SV=3 - [GLCM_HUMAN]	1.37597	0.919592	-	1.14778
Glutamate dehydrogenase 1, mitochondrial OS=Homo sapiens GN=GLUD1 PE=1 SV=2 - [DHE3_HUMAN]	0.926136	1.55221	1.46691	1.31509
Glutaminase kidney isoform, mitochondrial OS=Homo sapiens GN=GLS PE=1 SV=1 - [GLSK_HUMAN]	1.1665	0.762548	0.682746	0.870599
Glutamine--fructose-6-phosphate aminotransferase [isomerizing] 1 OS=Homo sapiens GN=GFPT1 PE=1 SV=3 - [GFPT1_HUMAN]	0.536042	0.59515	1.23884	0.79001
Glutamine--tRNA ligase OS=Homo sapiens GN=QARS PE=1 SV=1 - [SYQ_HUMAN]	2.22109	1.45367	1.52907	1.73461
Glutathione S-transferase omega-1 OS=Homo sapiens GN=GSTO1 PE=1 SV=2 - [GSTO1_HUMAN]	0.964661	1.23988	0.83362	1.01272
Glutathione S-transferase P OS=Homo sapiens GN=GSTP1 PE=1 SV=2 - [GSTP1_HUMAN]	1.1408	1.4039	1.2481	1.26426
Glyceraldehyde-3-phosphate dehydrogenase OS=Homo sapiens GN=GAPDH PE=1 SV=3 - [G3P_HUMAN]	0.918878	1.08472	0.933371	0.978989
Glycine--tRNA ligase OS=Homo sapiens GN=GARS PE=1 SV=3 - [SYG_HUMAN]	0.771858	0.75625	0.938453	0.822187
Glycogen phosphorylase, brain form OS=Homo sapiens GN=PYGB PE=1 SV=5 - [PYGB_HUMAN]	1.23968	0.991253	1.00646	1.07913
Glycogen phosphorylase, liver form OS=Homo sapiens GN=PYGL PE=1 SV=4 - [PYGL_HUMAN]	1.60404	1.28307	2.60332	1.83014
Golgi apparatus protein 1 OS=Homo sapiens GN=GLG1 PE=1 SV=2 - [GSLG1_HUMAN]	1.03002	0.882632	0.975246	0.962634
Golgi reassembly-stacking protein 2 OS=Homo sapiens GN=GORASP2 PE=1 SV=3 - [GORS2_HUMAN]	1.12471	-	-	1.12471
Golgi resident protein GCP60 OS=Homo sapiens GN=ACBD3 PE=1 SV=4 - [GCP60_HUMAN]	2.00293	1.12385	0.836183	1.32099
Golgin subfamily A member 2 OS=Homo sapiens GN=GOLGA2 PE=1 SV=3 - [GOGA2_HUMAN]	0.497685	0.448621	-	0.473153
Golgi-specific brefeldin A-resistance guanine nucleotide exchange factor 1 OS=Homo sapiens GN=GBF1 PE=1 SV=2 - [GBF1_HUMAN]	1.06234	0.960296	0.938827	0.987154
Growth arrest-specific protein 6 OS=Homo sapiens GN=GAS6 PE=1 SV=2 - [GAS6_HUMAN]	1.09223	0.887881	-	0.990055
GTP-binding nuclear protein Ran OS=Homo sapiens GN=RAN PE=1 SV=3 - [RAN_HUMAN]	1.12424	0.781269	1.0744	0.993306
GTP-binding protein SAR1a OS=Homo sapiens GN=SAR1A PE=1 SV=1 - [SAR1A_HUMAN]	-	-	0.63931	0.63931
Guanine nucleotide-binding protein G(i) subunit alpha-2 OS=Homo sapiens GN=GNAI2 PE=1 SV=3 - [GNAI2_HUMAN]	-	1.07544	0.566624	0.821035
Guanine nucleotide-binding protein G(I)/G(S)/G(T) subunit beta-1 OS=Homo sapiens GN=GNB1 PE=1 SV=3 - [GBB1_HUMAN]	-	1.31088	-	1.31088
Guanine nucleotide-binding protein G(I)/G(S)/G(T) subunit beta-2 OS=Homo sapiens GN=GNB2 PE=1 SV=3 - [GBB2_HUMAN]	0.788758	-	0.377148	0.582953
Guanine nucleotide-binding protein subunit beta-2-like 1 OS=Homo sapiens GN=GNB2L1 PE=1 SV=3 - [GBLP_HUMAN]	0.842557	0.767493	1.072	0.894016
Heat shock 70 kDa protein 1A/1B OS=Homo sapiens GN=HSPA1A PE=1 SV=5 - [HSP71_HUMAN]	1.92083	0.931813	1.6052	1.48595
Heat shock 70 kDa protein 4 OS=Homo sapiens GN=HSPA4 PE=1 SV=4 - [HSP74_HUMAN]	0.989616	1.28159	1.04093	1.10404
Heat shock 70 kDa protein 4L OS=Homo sapiens GN=HSPA4L PE=1 SV=3 - [HS74L_HUMAN]	6.78651	-	-	6.78651
Heat shock cognate 71 kDa protein OS=Homo sapiens GN=HSPA8 PE=1 SV=1 - [HSP7C_HUMAN]	0.717622	0.741568	0.717066	0.725418
Heat shock protein 105 kDa OS=Homo sapiens GN=HSPH1 PE=1 SV=1 - [HS105_HUMAN]	0.682954	0.718396	0.70163	0.700993
Heat shock protein beta-1 OS=Homo sapiens GN=HSPB1 PE=1 SV=2 - [HSPB1_HUMAN]	1.56593	0.824482	1.30447	1.23163
Heat shock protein HSP 90-alpha OS=Homo sapiens GN=HSP90AA1 PE=1 SV=5 - [HS90A_HUMAN]	0.909689	0.828721	0.934433	0.890948
Heat shock protein HSP 90-beta OS=Homo sapiens GN=HSP90AB1 PE=1 SV=4 - [HS90B_HUMAN]	0.922292	0.805187	0.899	0.875493
Hepatocyte growth factor-regulated tyrosine kinase substrate OS=Homo sapiens GN=HGS PE=1 SV=1 - [HGS_HUMAN]	0.986831	1.00605	-	0.996441
Hepatoma-derived growth factor-related protein 2 OS=Homo sapiens GN=HDGFRP2 PE=1 SV=1 - [HDGR2_HUMAN]	-	-	1.20759	1.20759
Heterochromatin protein 1-binding protein 3 OS=Homo sapiens GN=HP1BP3 PE=1 SV=1 - [HP1B3_HUMAN]	0.731278	-	-	0.731278
Heterogeneous nuclear ribonucleoprotein A/B OS=Homo sapiens GN=HNRNPAB PE=1 SV=2 - [ROAA_HUMAN]	0.74604	0.883115	1.09426	0.907805
Heterogeneous nuclear ribonucleoprotein A1 OS=Homo sapiens GN=HNRNPA1 PE=1 SV=5 - [ROA1_HUMAN]	0.642169	0.67209	0.803569	0.705943
Heterogeneous nuclear ribonucleoprotein A3 OS=Homo sapiens GN=HNRNPA3 PE=1 SV=2 - [ROA3_HUMAN]	0.902988	1.06789	0.972166	0.981016
Heterogeneous nuclear ribonucleoprotein D0 OS=Homo sapiens GN=HNRNPD PE=1 SV=1 - [HNRPD_HUMAN]	0.568813	0.760799	0.717859	0.68249
Heterogeneous nuclear ribonucleoprotein H OS=Homo sapiens GN=HNRNPH1 PE=1 SV=4 - [HNRH1_HUMAN]	0.967742	1.56074	1.51539	1.34796
Heterogeneous nuclear ribonucleoprotein K OS=Homo sapiens GN=HNRNPK PE=1 SV=1 - [HNRPK_HUMAN]	0.828831	0.87736	0.829743	0.845312
Heterogeneous nuclear ribonucleoprotein L OS=Homo sapiens GN=HNRNPL PE=1 SV=2 - [HNRPL_HUMAN]	0.722933	0.636833	0.595317	0.651694
Heterogeneous nuclear ribonucleoprotein M OS=Homo sapiens GN=HNRNPM PE=1 SV=3 - [HNRPM_HUMAN]	1.10327	1.14298	0.857581	1.03461
Heterogeneous nuclear ribonucleoprotein Q OS=Homo sapiens GN=SYNCRIP PE=1 SV=2 - [HNRPQ_HUMAN]	0.752149	0.764668	0.69787	0.738229
Heterogeneous nuclear ribonucleoprotein U OS=Homo sapiens GN=HNRNPU PE=1 SV=6 - [HNRPU_HUMAN]	0.70549	0.832775	0.775335	0.7712
Heterogeneous nuclear ribonucleoprotein U-like protein 1 OS=Homo sapiens GN=HNRNPUL1 PE=1 SV=2 - [HNRL1_HUMAN]	-	-	1.35931	1.35931
Heterogeneous nuclear ribonucleoprotein U-like protein 2 OS=Homo sapiens GN=HNRNPUL2 PE=1 SV=1 - [HNRL2_HUMAN]	0.518293	-	0.682769	0.600531
Heterogeneous nuclear ribonucleoproteins A2/B1 OS=Homo sapiens GN=HNRNPA2B1 PE=1 SV=2 - [ROA2_HUMAN]	0.921364	0.843106	0.880574	0.881681
Heterogeneous nuclear ribonucleoproteins C1/C2 OS=Homo sapiens GN=HNRNPC PE=1 SV=4 - [HNRPC_HUMAN]	0.698937	0.712243	0.754952	0.722044
Hexokinase-1 OS=Homo sapiens GN=HK1 PE=1 SV=3 - [HXK1_HUMAN]	0.822909	0.867849	0.794551	0.828436
Hexokinase-2 OS=Homo sapiens GN=HK2 PE=1 SV=2 - [HXK2_HUMAN]	0.520565	0.572094	1.28287	0.791845
Histone H1.2 OS=Homo sapiens GN=HIST1H1C PE=1 SV=2 - [H12_HUMAN]	0.268152	0.876406	0.839316	0.661291
Histone H2A type 1-H OS=Homo sapiens GN=HIST1H2AH PE=1 SV=3 - [H2A1H_HUMAN]	0.851919	0.874704	0.863853	0.863492
Histone H2B type 1-J OS=Homo sapiens GN=HIST1H2BJ PE=1 SV=3 - [H2B1J_HUMAN]	0.90068	-	-	0.90068
Histone H2B type 1-K OS=Homo sapiens GN=HIST1H2BK PE=1 SV=3 - [H2B1K_HUMAN]	0.653756	0.641615	0.587186	0.627519
Histone H3.1 OS=Homo sapiens GN=HIST1H3A PE=1 SV=2 - [H31_HUMAN]	-	0.691109	-	0.691109
Histone H3.2 OS=Homo sapiens GN=HIST2H3A PE=1 SV=3 - [H32_HUMAN]	0.82188	-	0.83594	0.82891
Histone H3.3 OS=Homo sapiens GN=H3F3A PE=1 SV=2 - [H33_HUMAN]	0.676453	-	-	0.676453
Histone H4 OS=Homo sapiens GN=HIST1H4A PE=1 SV=2 - [H4_HUMAN]	0.727711	0.787742	0.623073	0.712842
HLA class I histocompatibility antigen, A-2 alpha chain OS=Homo sapiens GN=HLA-A PE=1 SV=1 - [1A02_HUMAN]	1.20278	1.09659	0.975063	1.09148
Hydroxymethylglutaryl-CoA synthase, cytoplasmic OS=Homo sapiens GN=HMGCS1 PE=1 SV=2 - [HMCS1_HUMAN]	1.11132	-	0.820121	0.965719
Hypoxia up-regulated protein 1 OS=Homo sapiens GN=HYOU1 PE=1 SV=1 - [HYOU1_HUMAN]	1.07004	1.12374	1.24656	1.14678
Importin subunit alpha-3 OS=Homo sapiens GN=KPNA4 PE=1 SV=1 - [IMA3_HUMAN]	0.596792	-	-	0.596792
Importin subunit alpha-4 OS=Homo sapiens GN=KPNA3 PE=1 SV=2 - [IMA4_HUMAN]	1.58318	-	-	1.58318
Importin subunit beta-1 OS=Homo sapiens GN=KPNB1 PE=1 SV=2 - [IMB1_HUMAN]	0.929498	0.988253	0.865998	0.927917
Importin-11 OS=Homo sapiens GN=IPO11 PE=1 SV=1 - [IPO11_HUMAN]	0.889438	-	-	0.889438
Importin-4 OS=Homo sapiens GN=IPO4 PE=1 SV=2 - [IPO4_HUMAN]	1.69621	1.49984	1.43609	1.54404
Importin-5 OS=Homo sapiens GN=IPO5 PE=1 SV=4 - [IPO5_HUMAN]	0.913592	0.906771	0.826711	0.882358
Importin-7 OS=Homo sapiens GN=IPO7 PE=1 SV=1 - [IPO7_HUMAN]	0.691615	0.753151	0.803879	0.749548
Importin-9 OS=Homo sapiens GN=IPO9 PE=1 SV=3 - [IPO9_HUMAN]	1.71704	1.31238	1.42967	1.48636
Inhibitor of nuclear factor kappa-B kinase subunit beta OS=Homo sapiens GN=IKBKB PE=1 SV=1 - [IKKB_HUMAN]	0.306634	-	-	0.306634
Inorganic pyrophosphatase OS=Homo sapiens GN=PPA1 PE=1 SV=2 - [IPYR_HUMAN]	1.00932	2.06426	1.73403	1.60254
Inosine-5'-monophosphate dehydrogenase 2 OS=Homo sapiens GN=IMPDH2 PE=1 SV=2 - [IMDH2_HUMAN]	0.404037	-	-	0.404037
Insulin-like growth factor-binding protein 7 OS=Homo sapiens GN=IGFBP7 PE=1 SV=1 - [IBP7_HUMAN]	0.970845	-	-	0.970845
Integral membrane protein 2B OS=Homo sapiens GN=ITM2B PE=1 SV=1 - [ITM2B_HUMAN]	0.672196	-	-	0.672196
Integrin alpha-2 OS=Homo sapiens GN=ITGA2 PE=1 SV=1 - [ITA2_HUMAN]	0.762771	1.65247	0.91813	1.11113
Integrin alpha-3 OS=Homo sapiens GN=ITGA3 PE=1 SV=5 - [ITA3_HUMAN]	1.01288	1.17784	1.08879	1.09317
Integrin alpha-5 OS=Homo sapiens GN=ITGA5 PE=1 SV=2 - [ITA5_HUMAN]	0.993544	1.03869	1.13402	1.05542
Integrin alpha-V OS=Homo sapiens GN=ITGAV PE=1 SV=2 - [ITAV_HUMAN]	1.07946	0.762555	1.04757	0.963193
Integrin beta-1 OS=Homo sapiens GN=ITGB1 PE=1 SV=2 - [ITB1_HUMAN]	0.880796	0.884742	0.891344	0.885627
Integrin beta-5 OS=Homo sapiens GN=ITGB5 PE=1 SV=1 - [ITB5_HUMAN]	0.98122	1.16255	1.01243	1.05207
Interleukin enhancer-binding factor 2 OS=Homo sapiens GN=ILF2 PE=1 SV=2 - [ILF2_HUMAN]	-	2.40275	-	2.40275
Interleukin enhancer-binding factor 3 OS=Homo sapiens GN=ILF3 PE=1 SV=3 - [ILF3_HUMAN]	0.924204	0.966627	0.933581	0.941471
Inverted formin-2 OS=Homo sapiens GN=INF2 PE=1 SV=2 - [INF2_HUMAN]	1.29256	1.26015	1.77173	1.44148
Isocitrate dehydrogenase [NADP] cytoplasmic OS=Homo sapiens GN=IDH1 PE=1 SV=2 - [IDHC_HUMAN]	1.84358	1.30427	1.45206	1.5333
Isoleucine--tRNA ligase, cytoplasmic OS=Homo sapiens GN=IARS PE=1 SV=2 - [SYIC_HUMAN]	1.12134	1.1541	1.04549	1.10698
Isoleucine--tRNA ligase, mitochondrial OS=Homo sapiens GN=IARS2 PE=1 SV=2 - [SYIM_HUMAN]	2.03732	1.31779	1.88209	1.74573
Junction plakoglobin OS=Homo sapiens GN=JUP PE=1 SV=3 - [PLAK_HUMAN]	1.02423	1.21191	1.19414	1.14343
Keratin, type I cytoskeletal 18 OS=Homo sapiens GN=KRT18 PE=1 SV=2 - [K1C18_HUMAN]	1.01522	1.17287	1.21908	1.13572
Keratin, type II cytoskeletal 8 OS=Homo sapiens GN=KRT8 PE=1 SV=7 - [K2C8_HUMAN]	1.14661	1.07157	1.1901	1.1361
KH domain-containing, RNA-binding, signal transduction-associated protein 1 OS=Homo sapiens GN=KHDRBS1 PE=1 SV=1 - [KHDR1_HUMAN]	-	-	0.777324	0.777324
Kinectin OS=Homo sapiens GN=KTN1 PE=1 SV=1 - [KTN1_HUMAN]	0.770986	0.909144	0.714061	0.798064
Kinesin-1 heavy chain OS=Homo sapiens GN=KIF5B PE=1 SV=1 - [KINH_HUMAN]	0.84536	0.872503	0.862501	0.860121
Lactoylglutathione lyase OS=Homo sapiens GN=GLO1 PE=1 SV=4 - [LGUL_HUMAN]	-	0.830727	-	0.830727
Lamin-B1 OS=Homo sapiens GN=LMNB1 PE=1 SV=2 - [LMNB1_HUMAN]	0.658559	0.636532	0.862472	0.719187
Lamin-B2 OS=Homo sapiens GN=LMNB2 PE=1 SV=3 - [LMNB2_HUMAN]	1.09058	-	-	1.09058
Laminin subunit beta-1 OS=Homo sapiens GN=LAMB1 PE=1 SV=2 - [LAMB1_HUMAN]	0.964239	0.891258	1.52789	1.1278
Laminin subunit gamma-1 OS=Homo sapiens GN=LAMC1 PE=1 SV=3 - [LAMC1_HUMAN]	1.58756	1.05714	1.12911	1.25793
Lanosterol synthase OS=Homo sapiens GN=LSS PE=1 SV=1 - [ERG7_HUMAN]	1.75529	1.28885	1.14334	1.39583
La-related protein 1 OS=Homo sapiens GN=LARP1 PE=1 SV=2 - [LARP1_HUMAN]	0.704912	0.60169	-	0.653301
Large neutral amino acids transporter small subunit 1 OS=Homo sapiens GN=SLC7A5 PE=1 SV=2 - [LAT1_HUMAN]	-	-	1.05614	1.05614
Large proline-rich protein BAG6 OS=Homo sapiens GN=BAG6 PE=1 SV=2 - [BAG6_HUMAN]	1.57217	5.64685	2.23332	3.15078
Leptin receptor gene-related protein OS=Homo sapiens GN=LEPROT PE=2 SV=1 - [OBRG_HUMAN]	0.96133	1.05431	0.943938	0.986526
Leucine-rich PPR motif-containing protein, mitochondrial OS=Homo sapiens GN=LRPPRC PE=1 SV=3 - [LPPRC_HUMAN]	0.934816	1.08721	1.12048	1.0475
Leucine-rich repeat flightless-interacting protein 1 OS=Homo sapiens GN=LRRFIP1 PE=1 SV=2 - [LRRF1_HUMAN]	1.20281	0.831167	0.895051	0.976343
Leucine-rich repeat-containing protein 47 OS=Homo sapiens GN=LRRC47 PE=1 SV=1 - [LRC47_HUMAN]	2.42641	-	-	2.42641
Leucine-rich repeat-containing protein 59 OS=Homo sapiens GN=LRRC59 PE=1 SV=1 - [LRC59_HUMAN]	0.974696	-	-	0.974696
Leucine--tRNA ligase, cytoplasmic OS=Homo sapiens GN=LARS PE=1 SV=2 - [SYLC_HUMAN]	0.674107	0.985015	1.01463	0.891249
Leucyl-cystinyl aminopeptidase OS=Homo sapiens GN=LNPEP PE=1 SV=3 - [LCAP_HUMAN]	0.977405	-	-	0.977405
Leukotriene A-4 hydrolase OS=Homo sapiens GN=LTA4H PE=1 SV=2 - [LKHA4_HUMAN]	0.937473	2.22126	1.25166	1.47013
LIM and SH3 domain protein 1 OS=Homo sapiens GN=LASP1 PE=1 SV=2 - [LASP1_HUMAN]	1.04514	1.00364	-	1.02439
LIM domain and actin-binding protein 1 OS=Homo sapiens GN=LIMA1 PE=1 SV=1 - [LIMA1_HUMAN]	1.29118	1.16586	1.33187	1.26297
LIM domain only protein 7 OS=Homo sapiens GN=LMO7 PE=1 SV=3 - [LMO7_HUMAN]	0.886802	0.876992	0.942777	0.90219
Lipoma-preferred partner OS=Homo sapiens GN=LPP PE=1 SV=1 - [LPP_HUMAN]	2.30643	-	1.81609	2.06126
LisH domain-containing protein ARMC9 OS=Homo sapiens GN=ARMC9 PE=1 SV=2 - [ARMC9_HUMAN]	1.29883	1.70833	-	1.50358
L-lactate dehydrogenase A chain OS=Homo sapiens GN=LDHA PE=1 SV=2 - [LDHA_HUMAN]	0.9248	0.952066	0.916971	0.931279
L-lactate dehydrogenase B chain OS=Homo sapiens GN=LDHB PE=1 SV=2 - [LDHB_HUMAN]	0.929023	0.93157	0.923439	0.928011
Lon protease homolog, mitochondrial OS=Homo sapiens GN=LONP1 PE=1 SV=2 - [LONM_HUMAN]	0.849814	0.917678	1.01616	0.927883
Long-chain-fatty-acid--CoA ligase 4 OS=Homo sapiens GN=ACSL4 PE=1 SV=2 - [ACSL4_HUMAN]	0.42654	1.35869	-	0.892617
Low-density lipoprotein receptor OS=Homo sapiens GN=LDLR PE=1 SV=1 - [LDLR_HUMAN]	1.04949	0.704815	1.33059	1.0283
Low-density lipoprotein receptor-related protein 10 OS=Homo sapiens GN=LRP10 PE=1 SV=2 - [LRP10_HUMAN]	1.10441	1.45951	3.60684	2.05692
Low-density lipoprotein receptor-related protein 12 OS=Homo sapiens GN=LRP12 PE=1 SV=1 - [LRP12_HUMAN]	1.3707	1.34946	-	1.36008
Lupus La protein OS=Homo sapiens GN=SSB PE=1 SV=2 - [LA_HUMAN]	-	1.35847	-	1.35847
Lysine--tRNA ligase OS=Homo sapiens GN=KARS PE=1 SV=3 - [SYK_HUMAN]	1.30372	1.16541	1.18277	1.2173
Lysophospholipid acyltransferase 7 OS=Homo sapiens GN=MBOAT7 PE=1 SV=2 - [MBOA7_HUMAN]	-	21.9831	-	21.9831
Lysosomal acid lipase/cholesteryl ester hydrolase OS=Homo sapiens GN=LIPA PE=1 SV=2 - [LICH_HUMAN]	2.31807	-	-	2.31807
Lysosome membrane protein 2 OS=Homo sapiens GN=SCARB2 PE=1 SV=2 - [SCRB2_HUMAN]	0.923196	0.919742	1.20336	1.01543
Lysosome-associated membrane glycoprotein 1 OS=Homo sapiens GN=LAMP1 PE=1 SV=3 - [LAMP1_HUMAN]	0.999901	0.939471	0.963313	0.967561
Lysosome-associated membrane glycoprotein 2 OS=Homo sapiens GN=LAMP2 PE=1 SV=2 - [LAMP2_HUMAN]	0.832418	0.896364	0.855739	0.861507
Lysyl oxidase homolog 2 OS=Homo sapiens GN=LOXL2 PE=1 SV=1 - [LOXL2_HUMAN]	1.61996	1.19717	1.17481	1.33065
Macrophage migration inhibitory factor OS=Homo sapiens GN=MIF PE=1 SV=4 - [MIF_HUMAN]	1.02431	1.1635	1.00308	1.06363
Macrosialin OS=Homo sapiens GN=CD68 PE=1 SV=2 - [CD68_HUMAN]	-	-	0.732441	0.732441
Major vault protein OS=Homo sapiens GN=MVP PE=1 SV=4 - [MVP_HUMAN]	1.09148	1.13399	1.10753	1.111
Malate dehydrogenase, cytoplasmic OS=Homo sapiens GN=MDH1 PE=1 SV=4 - [MDHC_HUMAN]	1.14434	1.00712	1.10847	1.08664
Malate dehydrogenase, mitochondrial OS=Homo sapiens GN=MDH2 PE=1 SV=3 - [MDHM_HUMAN]	1.60792	1.80875	1.40743	1.60803
Mannosyl-oligosaccharide glucosidase OS=Homo sapiens GN=MOGS PE=1 SV=5 - [MOGS_HUMAN]	1.33916	1.2515	1.10184	1.23083
Matrin-3 OS=Homo sapiens GN=MATR3 PE=1 SV=2 - [MATR3_HUMAN]	0.687843	0.784704	0.823985	0.765511
Matrix metalloproteinase-14 OS=Homo sapiens GN=MMP14 PE=1 SV=3 - [MMP14_HUMAN]	1.04446	2.64884	0.690875	1.46139
Melanoma-associated antigen D2 OS=Homo sapiens GN=MAGED2 PE=1 SV=2 - [MAGD2_HUMAN]	-	3.27776	-	3.27776
Membrane cofactor protein OS=Homo sapiens GN=CD46 PE=1 SV=3 - [MCP_HUMAN]	4.4474	-	-	4.4474
Metalloproteinase inhibitor 2 OS=Homo sapiens GN=TIMP2 PE=1 SV=2 - [TIMP2_HUMAN]	-	1.18261	-	1.18261
Metalloreductase STEAP3 OS=Homo sapiens GN=STEAP3 PE=1 SV=2 - [STEA3_HUMAN]	0.77727	-	1.23107	1.00417
Metallothionein-2 OS=Homo sapiens GN=MT2A PE=1 SV=1 - [MT2_HUMAN]	0.898971	1.08882	0.839123	0.942305
Methionine--tRNA ligase, cytoplasmic OS=Homo sapiens GN=MARS PE=1 SV=2 - [SYMC_HUMAN]	0.98812	1.47747	1.2325	1.2327
Methylsterol monooxygenase 1 OS=Homo sapiens GN=MSMO1 PE=1 SV=1 - [MSMO1_HUMAN]	1.39186	2.666	0.912432	1.65676
Microsomal glutathione S-transferase 3 OS=Homo sapiens GN=MGST3 PE=1 SV=1 - [MGST3_HUMAN]	0.814803	0.91035	-	0.862576
Microtubule-actin cross-linking factor 1, isoforms 1/2/3/5 OS=Homo sapiens GN=MACF1 PE=1 SV=4 - [MACF1_HUMAN]	1.1749	0.838651	0.970826	0.994792
Microtubule-associated protein 1A OS=Homo sapiens GN=MAP1A PE=1 SV=6 - [MAP1A_HUMAN]	1.61259	-	1.39848	1.50553
Microtubule-associated protein 1B OS=Homo sapiens GN=MAP1B PE=1 SV=2 - [MAP1B_HUMAN]	0.677599	0.676958	0.70423	0.686262
Microtubule-associated protein 1S OS=Homo sapiens GN=MAP1S PE=1 SV=2 - [MAP1S_HUMAN]	-	0.557616	-	0.557616
Microtubule-associated protein 4 OS=Homo sapiens GN=MAP4 PE=1 SV=3 - [MAP4_HUMAN]	1.21639	1.41261	1.10039	1.24313
Microtubule-associated proteins 1A/1B light chain 3 beta 2 OS=Homo sapiens GN=MAP1LC3B2 PE=2 SV=1 - [MP3B2_HUMAN]	-	-	1.18219	1.18219
Minor histocompatibility antigen H13 OS=Homo sapiens GN=HM13 PE=1 SV=1 - [HM13_HUMAN]	-	-	2.32778	2.32778
Mitochondrial antiviral-signaling protein OS=Homo sapiens GN=MAVS PE=1 SV=2 - [MAVS_HUMAN]	2.67767	1.5914	-	2.13453
Mitochondrial import receptor subunit TOM70 OS=Homo sapiens GN=TOMM70A PE=1 SV=1 - [TOM70_HUMAN]	-	0.986423	1.38631	1.18637
Mitochondrial inner membrane protein OS=Homo sapiens GN=IMMT PE=1 SV=1 - [IMMT_HUMAN]	0.595146	1.03951	1.29226	0.975637
MMS19 nucleotide excision repair protein homolog OS=Homo sapiens GN=MMS19 PE=1 SV=2 - [MMS19_HUMAN]	1.07622	1.04679	0.994212	1.03908
Moesin OS=Homo sapiens GN=MSN PE=1 SV=3 - [MOES_HUMAN]	0.817788	0.826882	0.805316	0.816662
Monocarboxylate transporter 4 OS=Homo sapiens GN=SLC16A3 PE=1 SV=1 - [MOT4_HUMAN]	0.831052	1.00141	0.969271	0.93391
Mucolipin-1 OS=Homo sapiens GN=MCOLN1 PE=1 SV=1 - [MCLN1_HUMAN]	-	-	3.11906	3.11906
Multifunctional protein ADE2 OS=Homo sapiens GN=PAICS PE=1 SV=3 - [PUR6_HUMAN]	0.698348	-	1.49514	1.09674
Myb-binding protein 1A OS=Homo sapiens GN=MYBBP1A PE=1 SV=2 - [MBB1A_HUMAN]	1.64457	1.27589	2.11565	1.6787
Myeloid-associated differentiation marker OS=Homo sapiens GN=MYADM PE=1 SV=2 - [MYADM_HUMAN]	1.61119	1.32642	-	1.46881
Myoferlin OS=Homo sapiens GN=MYOF PE=1 SV=1 - [MYOF_HUMAN]	1.11667	1.13099	1.0772	1.10829
Myosin light chain kinase, smooth muscle OS=Homo sapiens GN=MYLK PE=1 SV=4 - [MYLK_HUMAN]	-	0.609876	1.20972	0.9098
Myosin light polypeptide 6 OS=Homo sapiens GN=MYL6 PE=1 SV=2 - [MYL6_HUMAN]	0.938947	1.10593	0.882032	0.975635
Myosin regulatory light chain 12A OS=Homo sapiens GN=MYL12A PE=1 SV=2 - [ML12A_HUMAN]	1.02925	0.964051	-	0.996651
Myosin-10 OS=Homo sapiens GN=MYH10 PE=1 SV=3 - [MYH10_HUMAN]	1.18541	1.20913	0.952553	1.1157
Myosin-9 OS=Homo sapiens GN=MYH9 PE=1 SV=4 - [MYH9_HUMAN]	1.03059	1.00961	1	1.0134
Myristoylated alanine-rich C-kinase substrate OS=Homo sapiens GN=MARCKS PE=1 SV=4 - [MARCS_HUMAN]	1.58393	2.01406	2.08422	1.89407
Na(+)/H(+) exchange regulatory cofactor NHE-RF1 OS=Homo sapiens GN=SLC9A3R1 PE=1 SV=4 - [NHRF1_HUMAN]	2.30251	-	-	2.30251
N-acetylglucosamine-6-sulfatase OS=Homo sapiens GN=GNS PE=1 SV=3 - [GNS_HUMAN]	1.85563	0.819927	2.99295	1.8895
N-acetyltransferase 10 OS=Homo sapiens GN=NAT10 PE=1 SV=2 - [NAT10_HUMAN]	1.25316	-	2.12129	1.68722
NAD(P) transhydrogenase, mitochondrial OS=Homo sapiens GN=NNT PE=1 SV=3 - [NNTM_HUMAN]	1.6404	1.16837	1.22964	1.34613
NAD(P)H dehydrogenase [quinone] 1 OS=Homo sapiens GN=NQO1 PE=1 SV=1 - [NQO1_HUMAN]	1.69757	2.22294	1.26037	1.72696
NADH-cytochrome b5 reductase 3 OS=Homo sapiens GN=CYB5R3 PE=1 SV=3 - [NB5R3_HUMAN]	1.21663	1.02149	1.16406	1.13406
NADPH--cytochrome P450 reductase OS=Homo sapiens GN=POR PE=1 SV=2 - [NCPR_HUMAN]	-	0.550187	0.602082	0.576134
N-alpha-acetyltransferase 15, NatA auxiliary subunit OS=Homo sapiens GN=NAA15 PE=1 SV=1 - [NAA15_HUMAN]	0.355234	0.967659	0.970173	0.764356
Nardilysin OS=Homo sapiens GN=NRD1 PE=1 SV=2 - [NRDC_HUMAN]	-	1.53314	0.172733	0.852935
Nascent polypeptide-associated complex subunit alpha, muscle-specific form OS=Homo sapiens GN=NACA PE=1 SV=1 - [NACAM_HUMAN]	0.731671	0.933645	0.865909	0.843742
Nck-associated protein 1 OS=Homo sapiens GN=NCKAP1 PE=1 SV=1 - [NCKP1_HUMAN]	1.04723	1.48403	0.607983	1.04641
NEDD4 family-interacting protein 2 OS=Homo sapiens GN=NDFIP2 PE=1 SV=2 - [NFIP2_HUMAN]	-	-	1.4113	1.4113
Neprilysin OS=Homo sapiens GN=MME PE=1 SV=2 - [NEP_HUMAN]	0.853489	0.693376	0.882954	0.80994
Neuroblast differentiation-associated protein AHNAK OS=Homo sapiens GN=AHNAK PE=1 SV=2 - [AHNK_HUMAN]	1.07781	1.0587	1.04937	1.06196
Neurogenic locus notch homolog protein 2 OS=Homo sapiens GN=NOTCH2 PE=1 SV=3 - [NOTC2_HUMAN]	1.58701	1.45165	1.56542	1.5347
Neuropathy target esterase OS=Homo sapiens GN=PNPLA6 PE=1 SV=2 - [PLPL6_HUMAN]	1.40612	-	-	1.40612
Neuropilin-1 OS=Homo sapiens GN=NRP1 PE=1 SV=3 - [NRP1_HUMAN]	0.583196	0.728548	0.668439	0.660061
Neuroplastin OS=Homo sapiens GN=NPTN PE=1 SV=2 - [NPTN_HUMAN]	0.905903	1.03262	0.963344	0.967288
Neutral alpha-glucosidase AB OS=Homo sapiens GN=GANAB PE=1 SV=3 - [GANAB_HUMAN]	1.04068	1.2457	1.14011	1.14216
Neutral amino acid transporter B(0) OS=Homo sapiens GN=SLC1A5 PE=1 SV=2 - [AAAT_HUMAN]	1.13777	0.715862	0.807762	0.887132
Neutral cholesterol ester hydrolase 1 OS=Homo sapiens GN=NCEH1 PE=1 SV=3 - [NCEH1_HUMAN]	-	0.874319	0.773714	0.824017
Nexilin OS=Homo sapiens GN=NEXN PE=1 SV=1 - [NEXN_HUMAN]	0.238531	-	-	0.238531
Niban-like protein 1 OS=Homo sapiens GN=FAM129B PE=1 SV=3 - [NIBL1_HUMAN]	0.93281	0.987892	0.901219	0.94064
Nicastrin OS=Homo sapiens GN=NCSTN PE=1 SV=2 - [NICA_HUMAN]	0.986865	1.1096	0.784452	0.960304
Niemann-Pick C1 protein OS=Homo sapiens GN=NPC1 PE=1 SV=2 - [NPC1_HUMAN]	1.05591	2.4161	0.916191	1.46273
Nodal modulator 3 OS=Homo sapiens GN=NOMO3 PE=2 SV=2 - [NOMO3_HUMAN]	0.751052	0.63969	1.04472	0.811822
Non-POU domain-containing octamer-binding protein OS=Homo sapiens GN=NONO PE=1 SV=4 - [NONO_HUMAN]	0.904534	0.858691	1.35711	1.04011
Nuclear factor of activated T-cells, cytoplasmic 1 OS=Homo sapiens GN=NFATC1 PE=1 SV=3 - [NFAC1_HUMAN]	-	-	2.42865	2.42865
Nuclear migration protein nudC OS=Homo sapiens GN=NUDC PE=1 SV=1 - [NUDC_HUMAN]	1.02621	0.790209	0.372751	0.729725
Nuclear mitotic apparatus protein 1 OS=Homo sapiens GN=NUMA1 PE=1 SV=2 - [NUMA1_HUMAN]	3.33859	-	-	3.33859
Nuclear pore complex protein Nup155 OS=Homo sapiens GN=NUP155 PE=1 SV=1 - [NU155_HUMAN]	-	1.59201	-	1.59201
Nuclear pore complex protein Nup205 OS=Homo sapiens GN=NUP205 PE=1 SV=3 - [NU205_HUMAN]	1.31684	-	-	1.31684
Nuclear pore complex protein Nup88 OS=Homo sapiens GN=NUP88 PE=1 SV=2 - [NUP88_HUMAN]	1.38553	-	-	1.38553
Nuclear pore complex protein Nup93 OS=Homo sapiens GN=NUP93 PE=1 SV=2 - [NUP93_HUMAN]	-	0.831958	-	0.831958
Nuclear protein localization protein 4 homolog OS=Homo sapiens GN=NPLOC4 PE=1 SV=3 - [NPL4_HUMAN]	1.32853	-	-	1.32853
Nuclear receptor coactivator 4 OS=Homo sapiens GN=NCOA4 PE=1 SV=1 - [NCOA4_HUMAN]	1.38363	-	0.692095	1.03786
Nuclease-sensitive element-binding protein 1 OS=Homo sapiens GN=YBX1 PE=1 SV=3 - [YBOX1_HUMAN]	2.20772	1.25012	1.84568	1.76784
Nucleolar complex protein 2 homolog OS=Homo sapiens GN=NOC2L PE=1 SV=4 - [NOC2L_HUMAN]	1.10991	-	-	1.10991
Nucleolar protein 56 OS=Homo sapiens GN=NOP56 PE=1 SV=4 - [NOP56_HUMAN]	-	-	0.32047	0.32047
Nucleolar RNA helicase 2 OS=Homo sapiens GN=DDX21 PE=1 SV=5 - [DDX21_HUMAN]	0.528369	0.730782	0.359918	0.53969
Nucleolin OS=Homo sapiens GN=NCL PE=1 SV=3 - [NUCL_HUMAN]	0.681026	0.611813	0.674516	0.655785
Nucleophosmin OS=Homo sapiens GN=NPM1 PE=1 SV=2 - [NPM_HUMAN]	0.917955	1.13541	1.07527	1.04288
Nucleoprotein TPR OS=Homo sapiens GN=TPR PE=1 SV=3 - [TPR_HUMAN]	0.713685	1.1569	0.816336	0.89564
Nucleoside diphosphate kinase A OS=Homo sapiens GN=NME1 PE=1 SV=1 - [NDKA_HUMAN]	-	-	2.31984	2.31984
Nucleoside diphosphate kinase B OS=Homo sapiens GN=NME2 PE=1 SV=1 - [NDKB_HUMAN]	1.50523	1.90815	-	1.70669
Nucleosome assembly protein 1-like 1 OS=Homo sapiens GN=NAP1L1 PE=1 SV=1 - [NP1L1_HUMAN]	1.04845	0.951374	1.00554	1.00179
Nucleosome assembly protein 1-like 4 OS=Homo sapiens GN=NAP1L4 PE=1 SV=1 - [NP1L4_HUMAN]	-	2.64191	2.48485	2.56338
Obg-like ATPase 1 OS=Homo sapiens GN=OLA1 PE=1 SV=2 - [OLA1_HUMAN]	0.925987	0.960298	1.03322	0.973168
Ornithine aminotransferase, mitochondrial OS=Homo sapiens GN=OAT PE=1 SV=1 - [OAT_HUMAN]	1.28084	0.599602	0.572302	0.817581
Oxysterol-binding protein 1 OS=Homo sapiens GN=OSBP PE=1 SV=1 - [OSBP1_HUMAN]	2.23367	1.97576	-	2.10472
Palladin OS=Homo sapiens GN=PALLD PE=1 SV=3 - [PALLD_HUMAN]	1.4755	2.55191	2.11325	2.04689
Paraspeckle component 1 OS=Homo sapiens GN=PSPC1 PE=1 SV=1 - [PSPC1_HUMAN]	2.81971	-	-	2.81971
PDZ and LIM domain protein 5 OS=Homo sapiens GN=PDLIM5 PE=1 SV=5 - [PDLI5_HUMAN]	1.21912	1.18114	0.84969	1.08332
PDZ and LIM domain protein 7 OS=Homo sapiens GN=PDLIM7 PE=1 SV=1 - [PDLI7_HUMAN]	-	0.538139	-	0.538139
Peptidyl-prolyl cis-trans isomerase A OS=Homo sapiens GN=PPIA PE=1 SV=2 - [PPIA_HUMAN]	0.917492	0.8964	0.827994	0.880628
Peptidyl-prolyl cis-trans isomerase B OS=Homo sapiens GN=PPIB PE=1 SV=2 - [PPIB_HUMAN]	1.2106	1.07147	0.914747	1.06561
Peptidyl-prolyl cis-trans isomerase FKBP10 OS=Homo sapiens GN=FKBP10 PE=1 SV=1 - [FKB10_HUMAN]	1.78758	1.5155	1.78913	1.69741
Peptidyl-prolyl cis-trans isomerase FKBP1A OS=Homo sapiens GN=FKBP1A PE=1 SV=2 - [FKB1A_HUMAN]	0.687733	0.525452	0.630135	0.61444
Perilipin-3 OS=Homo sapiens GN=PLIN3 PE=1 SV=3 - [PLIN3_HUMAN]	1.33656	6.18387	-	3.76022
Peroxidasin homolog OS=Homo sapiens GN=PXDN PE=1 SV=2 - [PXDN_HUMAN]	0.7313	-	-	0.7313
Peroxiredoxin-1 OS=Homo sapiens GN=PRDX1 PE=1 SV=1 - [PRDX1_HUMAN]	0.915815	0.866555	0.751851	0.84474
Peroxiredoxin-2 OS=Homo sapiens GN=PRDX2 PE=1 SV=5 - [PRDX2_HUMAN]	0.752144	0.834203	0.957267	0.847872
Peroxiredoxin-6 OS=Homo sapiens GN=PRDX6 PE=1 SV=3 - [PRDX6_HUMAN]	1.28406	2.69982	1.70761	1.89716
Peroxisomal multifunctional enzyme type 2 OS=Homo sapiens GN=HSD17B4 PE=1 SV=3 - [DHB4_HUMAN]	0.749139	0.839177	0.941227	0.843181
PERQ amino acid-rich with GYF domain-containing protein 2 OS=Homo sapiens GN=GIGYF2 PE=1 SV=1 - [PERQ2_HUMAN]	1.31959	-	0.566277	0.942934
Phosphate carrier protein, mitochondrial OS=Homo sapiens GN=SLC25A3 PE=1 SV=2 - [MPCP_HUMAN]	1.06955	1.11901	0.92012	1.03623
Phosphatidate phosphatase LPIN1 OS=Homo sapiens GN=LPIN1 PE=1 SV=2 - [LPIN1_HUMAN]	1.14109	-	-	1.14109
Phosphatidylethanolamine-binding protein 1 OS=Homo sapiens GN=PEBP1 PE=1 SV=3 - [PEBP1_HUMAN]	-	1.0002	-	1.0002
Phosphatidylinositol 4-kinase type 2-alpha OS=Homo sapiens GN=PI4K2A PE=1 SV=1 - [P4K2A_HUMAN]	1.48894	-	-	1.48894
Phosphatidylinositol-binding clathrin assembly protein OS=Homo sapiens GN=PICALM PE=1 SV=2 - [PICAL_HUMAN]	1.4012	1.2393	0.924093	1.1882
Phosphoglucomutase-1 OS=Homo sapiens GN=PGM1 PE=1 SV=3 - [PGM1_HUMAN]	-	3.8304	-	3.8304
Phosphoglucomutase-2 OS=Homo sapiens GN=PGM2 PE=1 SV=4 - [PGM2_HUMAN]	2.59946	-	-	2.59946
Phosphoglycerate kinase 1 OS=Homo sapiens GN=PGK1 PE=1 SV=3 - [PGK1_HUMAN]	1.17433	1.13139	1.22148	1.17573
Phosphoglycerate mutase 1 OS=Homo sapiens GN=PGAM1 PE=1 SV=2 - [PGAM1_HUMAN]	1.03132	1.15348	1.24266	1.14249
Phospholipase A-2-activating protein OS=Homo sapiens GN=PLAA PE=1 SV=2 - [PLAP_HUMAN]	-	0.465099	-	0.465099
Phospholipase D3 OS=Homo sapiens GN=PLD3 PE=1 SV=1 - [PLD3_HUMAN]	2.04177	2.2332	4.97497	3.08331
Phostensin OS=Homo sapiens GN=PPP1R18 PE=1 SV=1 - [PPR18_HUMAN]	1.31919	1.88295	-	1.60107
Plasma membrane calcium-transporting ATPase 1 OS=Homo sapiens GN=ATP2B1 PE=1 SV=3 - [AT2B1_HUMAN]	0.729248	-	0.777928	0.753588
Plasma membrane calcium-transporting ATPase 4 OS=Homo sapiens GN=ATP2B4 PE=1 SV=2 - [AT2B4_HUMAN]	0.924021	1.2786	1.70046	1.30103
Plasminogen activator inhibitor 1 OS=Homo sapiens GN=SERPINE1 PE=1 SV=1 - [PAI1_HUMAN]	0.802888	0.773564	0.845763	0.807405
Plasminogen activator inhibitor 1 RNA-binding protein OS=Homo sapiens GN=SERBP1 PE=1 SV=2 - [PAIRB_HUMAN]	-	1.05403	-	1.05403
Plastin-3 OS=Homo sapiens GN=PLS3 PE=1 SV=4 - [PLST_HUMAN]	1.22447	1.61839	1.38585	1.40957
Plectin OS=Homo sapiens GN=PLEC PE=1 SV=3 - [PLEC_HUMAN]	1.07878	1.1407	1.0329	1.08413
Plexin-B2 OS=Homo sapiens GN=PLXNB2 PE=1 SV=3 - [PLXB2_HUMAN]	-	1.06607	0.87871	0.972392
Poly [ADP-ribose] polymerase 1 OS=Homo sapiens GN=PARP1 PE=1 SV=4 - [PARP1_HUMAN]	0.227552	1.02632	-	0.626936
Poly [ADP-ribose] polymerase 4 OS=Homo sapiens GN=PARP4 PE=1 SV=3 - [PARP4_HUMAN]	0.971281	1.30315	1.25027	1.1749
Poly(rC)-binding protein 1 OS=Homo sapiens GN=PCBP1 PE=1 SV=2 - [PCBP1_HUMAN]	0.773496	0.855406	0.812737	0.81388
Poly(rC)-binding protein 2 OS=Homo sapiens GN=PCBP2 PE=1 SV=1 - [PCBP2_HUMAN]	-	-	1.56205	1.56205
Polyadenylate-binding protein 1 OS=Homo sapiens GN=PABPC1 PE=1 SV=2 - [PABP1_HUMAN]	0.693758	0.623997	0.730112	0.682623
Polymerase I and transcript release factor OS=Homo sapiens GN=PTRF PE=1 SV=1 - [PTRF_HUMAN]	-	-	1.2022	1.2022
Polypeptide N-acetylgalactosaminyltransferase 2 OS=Homo sapiens GN=GALNT2 PE=1 SV=1 - [GALT2_HUMAN]	0.931504	1.14106	1.33542	1.13599
Polypyrimidine tract-binding protein 1 OS=Homo sapiens GN=PTBP1 PE=1 SV=1 - [PTBP1_HUMAN]	1.08679	0.952112	1.21285	1.08392
Polyubiquitin-C OS=Homo sapiens GN=UBC PE=1 SV=3 - [UBC_HUMAN]	0.926807	0.908216	1.09573	0.976917
POTE ankyrin domain family member E OS=Homo sapiens GN=POTEE PE=1 SV=3 - [POTEE_HUMAN]	1.168	-	1.44609	1.30704
PRA1 family protein 3 OS=Homo sapiens GN=ARL6IP5 PE=1 SV=1 - [PRAF3_HUMAN]	1.56419	1.27846	-	1.42132
Pre-B-cell leukemia transcription factor-interacting protein 1 OS=Homo sapiens GN=PBXIP1 PE=1 SV=1 - [PBIP1_HUMAN]	-	-	1.42857	1.42857
Prelamin-A/C OS=Homo sapiens GN=LMNA PE=1 SV=1 - [LMNA_HUMAN]	0.862654	0.895122	0.870659	0.876145
Pre-mRNA-processing-splicing factor 8 OS=Homo sapiens GN=PRPF8 PE=1 SV=2 - [PRP8_HUMAN]	0.801932	0.616457	-	0.709195
Presequence protease, mitochondrial OS=Homo sapiens GN=PITRM1 PE=1 SV=3 - [PREP_HUMAN]	1.35817	2.18413	2.56558	2.03596
PRKC apoptosis WT1 regulator protein OS=Homo sapiens GN=PAWR PE=1 SV=1 - [PAWR_HUMAN]	0.895251	1.41451	-	1.15488
Probable ATP-dependent RNA helicase DDX17 OS=Homo sapiens GN=DDX17 PE=1 SV=2 - [DDX17_HUMAN]	1.90765	1.13153	1.00912	1.34943
Probable ATP-dependent RNA helicase DDX46 OS=Homo sapiens GN=DDX46 PE=1 SV=2 - [DDX46_HUMAN]	2.93004	0.671488	-	1.80077
Probable ATP-dependent RNA helicase DDX5 OS=Homo sapiens GN=DDX5 PE=1 SV=1 - [DDX5_HUMAN]	0.133244	0.736982	0.493681	0.454636
Probable ATP-dependent RNA helicase DDX58 OS=Homo sapiens GN=DDX58 PE=1 SV=2 - [DDX58_HUMAN]	-	1.13223	-	1.13223
Probable ATP-dependent RNA helicase DHX36 OS=Homo sapiens GN=DHX36 PE=1 SV=2 - [DHX36_HUMAN]	1.08098	-	-	1.08098
Probable cation-transporting ATPase 13A1 OS=Homo sapiens GN=ATP13A1 PE=1 SV=2 - [AT131_HUMAN]	-	0.742916	-	0.742916
Probable E3 ubiquitin-protein ligase HERC4 OS=Homo sapiens GN=HERC4 PE=1 SV=1 - [HERC4_HUMAN]	0.88846	1.94331	1.34307	1.39161
Probable fructose-2,6-bisphosphatase TIGAR OS=Homo sapiens GN=TIGAR PE=1 SV=1 - [TIGAR_HUMAN]	1.49004	-	-	1.49004
Probable phospholipid-transporting ATPase IC OS=Homo sapiens GN=ATP8B1 PE=1 SV=3 - [AT8B1_HUMAN]	-	1.22582	1.45284	1.33933
Probable ubiquitin carboxyl-terminal hydrolase FAF-X OS=Homo sapiens GN=USP9X PE=1 SV=3 - [USP9X_HUMAN]	0.838549	0.894458	0.91833	0.883779
Procollagen galactosyltransferase 1 OS=Homo sapiens GN=COLGALT1 PE=1 SV=1 - [GT251_HUMAN]	-	-	1.14698	1.14698
Procollagen-lysine,2-oxoglutarate 5-dioxygenase 1 OS=Homo sapiens GN=PLOD1 PE=1 SV=2 - [PLOD1_HUMAN]	1.08966	0.931366	1.54141	1.18748
Procollagen-lysine,2-oxoglutarate 5-dioxygenase 2 OS=Homo sapiens GN=PLOD2 PE=1 SV=2 - [PLOD2_HUMAN]	0.681113	0.650111	0.836142	0.722456
Procollagen-lysine,2-oxoglutarate 5-dioxygenase 3 OS=Homo sapiens GN=PLOD3 PE=1 SV=1 - [PLOD3_HUMAN]	-	0.5397	0.842084	0.690892
Profilin-1 OS=Homo sapiens GN=PFN1 PE=1 SV=2 - [PROF1_HUMAN]	0.830267	0.877684	0.874139	0.860696
Profilin-2 OS=Homo sapiens GN=PFN2 PE=1 SV=3 - [PROF2_HUMAN]	1.70318	-	-	1.70318
Programmed cell death 6-interacting protein OS=Homo sapiens GN=PDCD6IP PE=1 SV=1 - [PDC6I_HUMAN]	0.666635	0.708762	0.641409	0.672269
Prohibitin-2 OS=Homo sapiens GN=PHB2 PE=1 SV=2 - [PHB2_HUMAN]	-	0.416795	-	0.416795
Proliferating cell nuclear antigen OS=Homo sapiens GN=PCNA PE=1 SV=1 - [PCNA_HUMAN]	0.51685	0.663496	0.603148	0.594498
Proliferation-associated protein 2G4 OS=Homo sapiens GN=PA2G4 PE=1 SV=3 - [PA2G4_HUMAN]	0.970157	0.894006	1.02986	0.964673
Prolow-density lipoprotein receptor-related protein 1 OS=Homo sapiens GN=LRP1 PE=1 SV=2 - [LRP1_HUMAN]	1.06761	0.881691	0.940491	0.963263
Prolyl 3-hydroxylase 1 OS=Homo sapiens GN=LEPRE1 PE=1 SV=2 - [P3H1_HUMAN]	0.869381	0.81208	1.68464	1.12203
Prolyl 3-hydroxylase 3 OS=Homo sapiens GN=LEPREL2 PE=1 SV=1 - [P3H3_HUMAN]	0.785185	1.81173	-	1.29846
Prosaposin OS=Homo sapiens GN=PSAP PE=1 SV=2 - [SAP_HUMAN]	0.993736	1.11139	1.09579	1.06697
Proteasome activator complex subunit 2 OS=Homo sapiens GN=PSME2 PE=1 SV=4 - [PSME2_HUMAN]	0.966513	1.89351	-	1.43001
Proteasome subunit alpha type-2 OS=Homo sapiens GN=PSMA2 PE=1 SV=2 - [PSA2_HUMAN]	0.683591	-	1.21228	0.947934
Proteasome subunit alpha type-3 OS=Homo sapiens GN=PSMA3 PE=1 SV=2 - [PSA3_HUMAN]	-	-	1.68509	1.68509
Proteasome subunit alpha type-4 OS=Homo sapiens GN=PSMA4 PE=1 SV=1 - [PSA4_HUMAN]	-	1.72344	-	1.72344
Proteasome subunit alpha type-5 OS=Homo sapiens GN=PSMA5 PE=1 SV=3 - [PSA5_HUMAN]	-	-	1.78167	1.78167
Proteasome subunit alpha type-6 OS=Homo sapiens GN=PSMA6 PE=1 SV=1 - [PSA6_HUMAN]	1.2797	-	1.34686	1.31328
Proteasome subunit beta type-2 OS=Homo sapiens GN=PSMB2 PE=1 SV=1 - [PSB2_HUMAN]	1.68615	2.25876	1.68842	1.87778
Proteasome subunit beta type-4 OS=Homo sapiens GN=PSMB4 PE=1 SV=4 - [PSB4_HUMAN]	-	1.47256	-	1.47256
Proteasome-associated protein ECM29 homolog OS=Homo sapiens GN=ECM29 PE=1 SV=2 - [ECM29_HUMAN]	1.58797	1.16842	0.690401	1.14893
Protein AHNAK2 OS=Homo sapiens GN=AHNAK2 PE=1 SV=2 - [AHNK2_HUMAN]	1.27915	1.19648	1.26272	1.24612
Protein CutA OS=Homo sapiens GN=CUTA PE=1 SV=2 - [CUTA_HUMAN]	-	1.87599	1.63428	1.75513
Protein CYR61 OS=Homo sapiens GN=CYR61 PE=1 SV=1 - [CYR61_HUMAN]	0.801993	0.915055	0.711462	0.809503
Protein DEK OS=Homo sapiens GN=DEK PE=1 SV=1 - [DEK_HUMAN]	-	0.746507	-	0.746507
Protein diaphanous homolog 1 OS=Homo sapiens GN=DIAPH1 PE=1 SV=2 - [DIAP1_HUMAN]	-	1.13426	-	1.13426
Protein disulfide-isomerase A3 OS=Homo sapiens GN=PDIA3 PE=1 SV=4 - [PDIA3_HUMAN]	0.995363	1.04085	0.921785	0.986
Protein disulfide-isomerase A4 OS=Homo sapiens GN=PDIA4 PE=1 SV=2 - [PDIA4_HUMAN]	0.873414	0.99929	0.866583	0.913096
Protein disulfide-isomerase A6 OS=Homo sapiens GN=PDIA6 PE=1 SV=1 - [PDIA6_HUMAN]	1.52879	1.4155	1.07011	1.33813
Protein disulfide-isomerase OS=Homo sapiens GN=P4HB PE=1 SV=3 - [PDIA1_HUMAN]	0.923511	0.966887	1.03981	0.976737
Protein DJ-1 OS=Homo sapiens GN=PARK7 PE=1 SV=2 - [PARK7_HUMAN]	1.72503	-	-	1.72503
Protein enabled homolog OS=Homo sapiens GN=ENAH PE=1 SV=2 - [ENAH_HUMAN]	-	-	4.67245	4.67245
Protein flightless-1 homolog OS=Homo sapiens GN=FLII PE=1 SV=2 - [FLII_HUMAN]	1.14348	1.23972	0.8724	1.0852
Protein NOXP20 OS=Homo sapiens GN=FAM114A1 PE=1 SV=2 - [NXP20_HUMAN]	0.672559	0.694496	0.684864	0.683973
Protein phosphatase 1 regulatory subunit 12A OS=Homo sapiens GN=PPP1R12A PE=1 SV=1 - [MYPT1_HUMAN]	0.69529	0.62358	0.746017	0.688295
Protein S100-A11 OS=Homo sapiens GN=S100A11 PE=1 SV=2 - [S10AB_HUMAN]	1.86907	0.577974	3.43412	1.96039
Protein S100-A6 OS=Homo sapiens GN=S100A6 PE=1 SV=1 - [S10A6_HUMAN]	0.715797	0.821087	0.839304	0.792063
Protein SET OS=Homo sapiens GN=SET PE=1 SV=3 - [SET_HUMAN]	-	1.76296	0.768995	1.26598
Protein transport protein Sec16A OS=Homo sapiens GN=SEC16A PE=1 SV=3 - [SC16A_HUMAN]	-	-	5.35327	5.35327
Protein transport protein Sec23A OS=Homo sapiens GN=SEC23A PE=1 SV=2 - [SC23A_HUMAN]	0.701023	0.963049	0.185967	0.61668
Protein transport protein Sec23B OS=Homo sapiens GN=SEC23B PE=1 SV=2 - [SC23B_HUMAN]	3.08551	-	2.58774	2.83662
Protein transport protein Sec24B OS=Homo sapiens GN=SEC24B PE=1 SV=2 - [SC24B_HUMAN]	0.862048	-	-	0.862048
Protein transport protein Sec24C OS=Homo sapiens GN=SEC24C PE=1 SV=3 - [SC24C_HUMAN]	1.61649	2.38646	1.3753	1.79275
Protein transport protein Sec31A OS=Homo sapiens GN=SEC31A PE=1 SV=3 - [SC31A_HUMAN]	0.936389	0.903992	0.841918	0.8941
Protein transport protein Sec61 subunit alpha isoform 1 OS=Homo sapiens GN=SEC61A1 PE=1 SV=2 - [S61A1_HUMAN]	2.21671	1.50577	2.06604	1.92951
Protein unc-45 homolog A OS=Homo sapiens GN=UNC45A PE=1 SV=1 - [UN45A_HUMAN]	2.05375	0.804596	-	1.42917
Protein VAC14 homolog OS=Homo sapiens GN=VAC14 PE=1 SV=1 - [VAC14_HUMAN]	0.747064	1.37037	1.37798	1.16514
Protein-glutamine gamma-glutamyltransferase 2 OS=Homo sapiens GN=TGM2 PE=1 SV=2 - [TGM2_HUMAN]	1.24559	1.20488	1.24901	1.23316
Prothrombin OS=Homo sapiens GN=F2 PE=1 SV=2 - [THRB_HUMAN]	3.36016	-	-	3.36016
Purine nucleoside phosphorylase OS=Homo sapiens GN=PNP PE=1 SV=2 - [PNPH_HUMAN]	0.904622	-	-	0.904622
Puromycin-sensitive aminopeptidase OS=Homo sapiens GN=NPEPPS PE=1 SV=2 - [PSA_HUMAN]	0.910507	0.974725	0.984427	0.956553
Putative ATP-dependent RNA helicase DHX30 OS=Homo sapiens GN=DHX30 PE=1 SV=1 - [DHX30_HUMAN]	-	1.36581	-	1.36581
Putative heat shock protein HSP 90-beta 4 OS=Homo sapiens GN=HSP90AB4P PE=5 SV=1 - [H90B4_HUMAN]	0.727469	-	0.537531	0.6325
Putative pre-mRNA-splicing factor ATP-dependent RNA helicase DHX15 OS=Homo sapiens GN=DHX15 PE=1 SV=2 - [DHX15_HUMAN]	0.523749	0.354428	0.53115	0.469776
Putative protein FAM10A4 OS=Homo sapiens GN=ST13P4 PE=5 SV=1 - [ST134_HUMAN]	-	2.16419	1.62513	1.89466
Putative ribosomal RNA methyltransferase NOP2 OS=Homo sapiens GN=NOP2 PE=1 SV=2 - [NOP2_HUMAN]	1.16448	-	-	1.16448
Pyridoxal kinase OS=Homo sapiens GN=PDXK PE=1 SV=1 - [PDXK_HUMAN]	-	-	5.8004	5.8004
Pyruvate kinase PKM OS=Homo sapiens GN=PKM PE=1 SV=4 - [KPYM_HUMAN]	0.88351	0.993375	1.02165	0.96618
Rab GDP dissociation inhibitor alpha OS=Homo sapiens GN=GDI1 PE=1 SV=2 - [GDIA_HUMAN]	-	-	1.64369	1.64369
Rab GDP dissociation inhibitor beta OS=Homo sapiens GN=GDI2 PE=1 SV=2 - [GDIB_HUMAN]	0.842983	1.31878	1.12647	1.09608
Rab3 GTPase-activating protein catalytic subunit OS=Homo sapiens GN=RAB3GAP1 PE=1 SV=3 - [RB3GP_HUMAN]	-	1.34562	-	1.34562
Rab3 GTPase-activating protein non-catalytic subunit OS=Homo sapiens GN=RAB3GAP2 PE=1 SV=1 - [RBGPR_HUMAN]	-	-	1.22682	1.22682
Radixin OS=Homo sapiens GN=RDX PE=1 SV=1 - [RADI_HUMAN]	-	1.4474	2.10046	1.77393
Raftlin OS=Homo sapiens GN=RFTN1 PE=1 SV=4 - [RFTN1_HUMAN]	-	4.50027	-	4.50027
Ran GTPase-activating protein 1 OS=Homo sapiens GN=RANGAP1 PE=1 SV=1 - [RAGP1_HUMAN]	1.82368	0.884102	0.562728	1.09017
Rap1 GTPase-GDP dissociation stimulator 1 OS=Homo sapiens GN=RAP1GDS1 PE=1 SV=3 - [GDS1_HUMAN]	-	0.84012	0.72593	0.783025
Ras GTPase-activating protein-binding protein 1 OS=Homo sapiens GN=G3BP1 PE=1 SV=1 - [G3BP1_HUMAN]	1.56477	0.940411	1.1596	1.22159
Ras GTPase-activating-like protein IQGAP1 OS=Homo sapiens GN=IQGAP1 PE=1 SV=1 - [IQGA1_HUMAN]	0.905431	0.940085	0.926485	0.924
Ras-related protein Rab-10 OS=Homo sapiens GN=RAB10 PE=1 SV=1 - [RAB10_HUMAN]	0.434645	0.706335	-	0.57049
Ras-related protein Rab-11A OS=Homo sapiens GN=RAB11A PE=1 SV=3 - [RB11A_HUMAN]	1.15048	1.19445	0.959316	1.10142
Ras-related protein Rab-14 OS=Homo sapiens GN=RAB14 PE=1 SV=4 - [RAB14_HUMAN]	0.528013	-	-	0.528013
Ras-related protein Rab-1B OS=Homo sapiens GN=RAB1B PE=1 SV=1 - [RAB1B_HUMAN]	2.23266	-	-	2.23266
Ras-related protein Rab-5C OS=Homo sapiens GN=RAB5C PE=1 SV=2 - [RAB5C_HUMAN]	1.48276	0.935417	1.1492	1.18913
Ras-related protein Rab-7a OS=Homo sapiens GN=RAB7A PE=1 SV=1 - [RAB7A_HUMAN]	1.10224	1.33425	0.823169	1.08655
Ras-related protein Rap-1b-like protein OS=Homo sapiens PE=2 SV=1 - [RP1BL_HUMAN]	1.67976	-	1.44292	1.56134
Ras-related protein R-Ras2 OS=Homo sapiens GN=RRAS2 PE=1 SV=1 - [RRAS2_HUMAN]	1.40446	2.72747	0.838631	1.65685
Regulator of nonsense transcripts 1 OS=Homo sapiens GN=UPF1 PE=1 SV=2 - [RENT1_HUMAN]	1.3904	1.55984	1.22135	1.39053
Reticulocalbin-1 OS=Homo sapiens GN=RCN1 PE=1 SV=1 - [RCN1_HUMAN]	-	0.820829	-	0.820829
Reticulon-4 OS=Homo sapiens GN=RTN4 PE=1 SV=2 - [RTN4_HUMAN]	0.903424	0.704798	0.700556	0.769593
Rho GDP-dissociation inhibitor 1 OS=Homo sapiens GN=ARHGDIA PE=1 SV=3 - [GDIR1_HUMAN]	9.46453	2.35301	1.95887	4.59214
Rho GTPase-activating protein 18 OS=Homo sapiens GN=ARHGAP18 PE=1 SV=3 - [RHG18_HUMAN]	1.1878	1.11862	0.846569	1.05099
Rho-related GTP-binding protein RhoC OS=Homo sapiens GN=RHOC PE=1 SV=1 - [RHOC_HUMAN]	-	2.5502	-	2.5502
Ribonuclease inhibitor OS=Homo sapiens GN=RNH1 PE=1 SV=2 - [RINI_HUMAN]	1.02414	1.25578	1.09519	1.12504
Ribonucleoside-diphosphate reductase large subunit OS=Homo sapiens GN=RRM1 PE=1 SV=1 - [RIR1_HUMAN]	0.427844	1.02674	-	0.727291
Ribose-phosphate pyrophosphokinase 1 OS=Homo sapiens GN=PRPS1 PE=1 SV=2 - [PRPS1_HUMAN]	0.476991	-	0.589128	0.533059
Ribosomal L1 domain-containing protein 1 OS=Homo sapiens GN=RSL1D1 PE=1 SV=3 - [RL1D1_HUMAN]	-	-	0.604559	0.604559
Ribosome biogenesis protein BOP1 OS=Homo sapiens GN=BOP1 PE=1 SV=2 - [BOP1_HUMAN]	1.99644	3.55612	-	2.77628
Ribosome-binding protein 1 OS=Homo sapiens GN=RRBP1 PE=1 SV=4 - [RRBP1_HUMAN]	1.01407	1.02977	0.925993	0.989944
RNA binding motif protein, X-linked-like-1 OS=Homo sapiens GN=RBMXL1 PE=1 SV=1 - [RMXL1_HUMAN]	-	0.699894	-	0.699894
RNA-binding protein 14 OS=Homo sapiens GN=RBM14 PE=1 SV=2 - [RBM14_HUMAN]	1.44089	1.65575	1.52758	1.54141
RNA-binding protein EWS OS=Homo sapiens GN=EWSR1 PE=1 SV=1 - [EWS_HUMAN]	1.19546	0.922736	1.14487	1.08769
RNA-binding protein FUS OS=Homo sapiens GN=FUS PE=1 SV=1 - [FUS_HUMAN]	-	1.75537	1.53364	1.6445
RRP12-like protein OS=Homo sapiens GN=RRP12 PE=1 SV=2 - [RRP12_HUMAN]	1.28343	1.0623	1.15939	1.16837
RuvB-like 1 OS=Homo sapiens GN=RUVBL1 PE=1 SV=1 - [RUVB1_HUMAN]	-	-	0.760947	0.760947
Sarcoplasmic/endoplasmic reticulum calcium ATPase 2 OS=Homo sapiens GN=ATP2A2 PE=1 SV=1 - [AT2A2_HUMAN]	0.789765	0.860186	0.936115	0.862022
Scaffold attachment factor B1 OS=Homo sapiens GN=SAFB PE=1 SV=4 - [SAFB1_HUMAN]	0.28464	0.567704	1.37788	0.743407
Scavenger receptor class B member 1 OS=Homo sapiens GN=SCARB1 PE=1 SV=1 - [SCRB1_HUMAN]	-	0.848314	-	0.848314
SEC23-interacting protein OS=Homo sapiens GN=SEC23IP PE=1 SV=1 - [S23IP_HUMAN]	0.874357	0.934451	0.624692	0.811167
Secernin-1 OS=Homo sapiens GN=SCRN1 PE=1 SV=2 - [SCRN1_HUMAN]	1.32064	-	5.18349	3.25207
Secreted frizzled-related protein 1 OS=Homo sapiens GN=SFRP1 PE=1 SV=1 - [SFRP1_HUMAN]	-	1.01498	-	1.01498
Secretory carrier-associated membrane protein 3 OS=Homo sapiens GN=SCAMP3 PE=1 SV=3 - [SCAM3_HUMAN]	1.23563	-	-	1.23563
Secretory carrier-associated membrane protein 4 OS=Homo sapiens GN=SCAMP4 PE=2 SV=1 - [SCAM4_HUMAN]	-	1.01882	0.82823	0.923524
Semaphorin-3C OS=Homo sapiens GN=SEMA3C PE=1 SV=2 - [SEM3C_HUMAN]	-	0.445531	-	0.445531
Semaphorin-7A OS=Homo sapiens GN=SEMA7A PE=1 SV=1 - [SEM7A_HUMAN]	4.05976	0.717236	0.513395	1.76346
Seprase OS=Homo sapiens GN=FAP PE=1 SV=5 - [SEPR_HUMAN]	-	1.33233	1.06133	1.19683
Septin-11 OS=Homo sapiens GN=SEPT11 PE=1 SV=3 - [SEP11_HUMAN]	-	1.79502	-	1.79502
Septin-2 OS=Homo sapiens GN=SEPT2 PE=1 SV=1 - [SEPT2_HUMAN]	1.50628	-	-	1.50628
Septin-9 OS=Homo sapiens GN=SEPT9 PE=1 SV=2 - [SEPT9_HUMAN]	1.17445	1.17312	1.2031	1.18356
Sequestosome-1 OS=Homo sapiens GN=SQSTM1 PE=1 SV=1 - [SQSTM_HUMAN]	0.925561	0.985274	1.3189	1.07658
Serglycin OS=Homo sapiens GN=SRGN PE=1 SV=3 - [SRGN_HUMAN]	0.826783	0.872426	-	0.849605
Serine beta-lactamase-like protein LACTB, mitochondrial OS=Homo sapiens GN=LACTB PE=1 SV=2 - [LACTB_HUMAN]	0.513277	0.635948	0.675482	0.608236
Serine hydroxymethyltransferase, mitochondrial OS=Homo sapiens GN=SHMT2 PE=1 SV=3 - [GLYM_HUMAN]	-	0.39977	0.384821	0.392296
Serine incorporator 1 OS=Homo sapiens GN=SERINC1 PE=1 SV=1 - [SERC1_HUMAN]	-	0.824746	0.593015	0.708881
Serine/threonine-protein phosphatase 2A 55 kDa regulatory subunit B alpha isoform OS=Homo sapiens GN=PPP2R2A PE=1 SV=1 - [2ABA_HUMAN]	0.82034	0.606598	-	0.713469
Serine/threonine-protein phosphatase 2A 65 kDa regulatory subunit A alpha isoform OS=Homo sapiens GN=PPP2R1A PE=1 SV=4 - [2AAA_HUMAN]	1.05589	0.959285	1.17547	1.06355
Serine/threonine-protein phosphatase PP1-gamma catalytic subunit OS=Homo sapiens GN=PPP1CC PE=1 SV=1 - [PP1G_HUMAN]	-	1.51808	-	1.51808
Serine-threonine kinase receptor-associated protein OS=Homo sapiens GN=STRAP PE=1 SV=1 - [STRAP_HUMAN]	-	-	1.48141	1.48141
Serine--tRNA ligase, cytoplasmic OS=Homo sapiens GN=SARS PE=1 SV=3 - [SYSC_HUMAN]	0.881363	1.2189	0.989837	1.03003
Serpin H1 OS=Homo sapiens GN=SERPINH1 PE=1 SV=2 - [SERPH_HUMAN]	1.19555	1.05103	1.0137	1.08676
Serrate RNA effector molecule homolog OS=Homo sapiens GN=SRRT PE=1 SV=1 - [SRRT_HUMAN]	0.830157	0.816961	-	0.823559
S-formylglutathione hydrolase OS=Homo sapiens GN=ESD PE=1 SV=2 - [ESTD_HUMAN]	-	1.67951	-	1.67951
SH3 domain-binding glutamic acid-rich-like protein 3 OS=Homo sapiens GN=SH3BGRL3 PE=1 SV=1 - [SH3L3_HUMAN]	-	0.239619	-	0.239619
Signal recognition particle 14 kDa protein OS=Homo sapiens GN=SRP14 PE=1 SV=2 - [SRP14_HUMAN]	1.41444	0.819981	1.31776	1.18406
Signal recognition particle subunit SRP72 OS=Homo sapiens GN=SRP72 PE=1 SV=3 - [SRP72_HUMAN]	1.12806	1.13431	-	1.13118
Signal transducer and activator of transcription 1-alpha/beta OS=Homo sapiens GN=STAT1 PE=1 SV=2 - [STAT1_HUMAN]	0.702191	1.06707	1.05668	0.941978
Signal transducer and activator of transcription 2 OS=Homo sapiens GN=STAT2 PE=1 SV=1 - [STAT2_HUMAN]	-	1.45251	-	1.45251
Signal transducer and activator of transcription 3 OS=Homo sapiens GN=STAT3 PE=1 SV=2 - [STAT3_HUMAN]	1.63422	0.537734	-	1.08598
Signal transducer and activator of transcription 6 OS=Homo sapiens GN=STAT6 PE=1 SV=1 - [STAT6_HUMAN]	1.42468	-	-	1.42468
Signal-induced proliferation-associated protein 1 OS=Homo sapiens GN=SIPA1 PE=1 SV=1 - [SIPA1_HUMAN]	-	0.880896	-	0.880896
SLIT-ROBO Rho GTPase-activating protein 1 OS=Homo sapiens GN=SRGAP1 PE=1 SV=1 - [SRGP1_HUMAN]	1.06067	1.69272	1.75228	1.50189
Small ubiquitin-related modifier 2 OS=Homo sapiens GN=SUMO2 PE=1 SV=3 - [SUMO2_HUMAN]	0.65964	-	0.577086	0.618363
Sodium bicarbonate cotransporter 3 OS=Homo sapiens GN=SLC4A7 PE=1 SV=2 - [S4A7_HUMAN]	-	1.23805	-	1.23805
Sodium/potassium-transporting ATPase subunit alpha-1 OS=Homo sapiens GN=ATP1A1 PE=1 SV=1 - [AT1A1_HUMAN]	0.879009	0.874383	0.879344	0.877579
Sodium/potassium-transporting ATPase subunit beta-3 OS=Homo sapiens GN=ATP1B3 PE=1 SV=1 - [AT1B3_HUMAN]	-	1.54367	-	1.54367
Sodium-coupled neutral amino acid transporter 2 OS=Homo sapiens GN=SLC38A2 PE=1 SV=2 - [S38A2_HUMAN]	1.02697	0.763596	0.942936	0.911168
Sodium-dependent phosphate transporter 1 OS=Homo sapiens GN=SLC20A1 PE=1 SV=1 - [S20A1_HUMAN]	0.654153	0.575466	0.693973	0.641198
Solute carrier family 2, facilitated glucose transporter member 1 OS=Homo sapiens GN=SLC2A1 PE=1 SV=2 - [GTR1_HUMAN]	1.29871	1.11468	1.01387	1.14242
Sortilin OS=Homo sapiens GN=SORT1 PE=1 SV=3 - [SORT_HUMAN]	1.14437	3.23303	1.40993	1.92911
Sorting nexin-1 OS=Homo sapiens GN=SNX1 PE=1 SV=3 - [SNX1_HUMAN]	0.946625	0.501133	0.600712	0.682823
Spartin OS=Homo sapiens GN=SPG20 PE=1 SV=1 - [SPG20_HUMAN]	1.32325	0.796028	1.24312	1.1208
Spectrin alpha chain, non-erythrocytic 1 OS=Homo sapiens GN=SPTAN1 PE=1 SV=3 - [SPTN1_HUMAN]	0.825854	0.815965	0.844565	0.828794
Spectrin beta chain, non-erythrocytic 1 OS=Homo sapiens GN=SPTBN1 PE=1 SV=2 - [SPTB2_HUMAN]	0.84625	0.806598	0.822386	0.825078
Spliceosome RNA helicase DDX39B OS=Homo sapiens GN=DDX39B PE=1 SV=1 - [DX39B_HUMAN]	1.79922	0.345225	1.31413	1.15286
Splicing factor 1 OS=Homo sapiens GN=SF1 PE=1 SV=4 - [SF01_HUMAN]	-	0.471419	-	0.471419
Splicing factor 3B subunit 1 OS=Homo sapiens GN=SF3B1 PE=1 SV=3 - [SF3B1_HUMAN]	0.989792	0.865897	0.894725	0.916805
Splicing factor 3B subunit 2 OS=Homo sapiens GN=SF3B2 PE=1 SV=2 - [SF3B2_HUMAN]	1.23319	1.30281	-	1.268
Splicing factor 3B subunit 3 OS=Homo sapiens GN=SF3B3 PE=1 SV=4 - [SF3B3_HUMAN]	0.613034	0.824301	0.624879	0.687405
Splicing factor, proline- and glutamine-rich OS=Homo sapiens GN=SFPQ PE=1 SV=2 - [SFPQ_HUMAN]	1.2332	0.915431	1.2014	1.11668
Squalene synthase OS=Homo sapiens GN=FDFT1 PE=1 SV=1 - [FDFT_HUMAN]	-	0.212154	-	0.212154
Src substrate cortactin OS=Homo sapiens GN=CTTN PE=1 SV=2 - [SRC8_HUMAN]	0.794577	0.856796	0.769231	0.806868
Staphylococcal nuclease domain-containing protein 1 OS=Homo sapiens GN=SND1 PE=1 SV=1 - [SND1_HUMAN]	1.09681	1.02741	0.848451	0.990891
Stathmin OS=Homo sapiens GN=STMN1 PE=1 SV=3 - [STMN1_HUMAN]	-	0.399063	-	0.399063
Stress-70 protein, mitochondrial OS=Homo sapiens GN=HSPA9 PE=1 SV=2 - [GRP75_HUMAN]	0.880624	0.908058	0.880378	0.889687
Stress-induced-phosphoprotein 1 OS=Homo sapiens GN=STIP1 PE=1 SV=1 - [STIP1_HUMAN]	0.759776	0.947927	0.585732	0.764478
Structural maintenance of chromosomes protein 3 OS=Homo sapiens GN=SMC3 PE=1 SV=2 - [SMC3_HUMAN]	0.444121	0.526109	-	0.485115
Sulfhydryl oxidase 1 OS=Homo sapiens GN=QSOX1 PE=1 SV=3 - [QSOX1_HUMAN]	1.0007	-	-	1.0007
Superoxide dismutase [Mn], mitochondrial OS=Homo sapiens GN=SOD2 PE=1 SV=2 - [SODM_HUMAN]	1.58829	1.32104	1.11875	1.3427
Surfeit locus protein 4 OS=Homo sapiens GN=SURF4 PE=1 SV=3 - [SURF4_HUMAN]	0.76536	0.803524	0.885594	0.818159
SURP and G-patch domain-containing protein 2 OS=Homo sapiens GN=SUGP2 PE=1 SV=2 - [SUGP2_HUMAN]	0.715577	0.600951	-	0.658264
Synaptic vesicle membrane protein VAT-1 homolog OS=Homo sapiens GN=VAT1 PE=1 SV=2 - [VAT1_HUMAN]	1.19095	2.4947	1.38941	1.69169
Syndecan-1 OS=Homo sapiens GN=SDC1 PE=1 SV=3 - [SDC1_HUMAN]	0.803713	1.07009	0.826602	0.900135
Talin-1 OS=Homo sapiens GN=TLN1 PE=1 SV=3 - [TLN1_HUMAN]	0.945966	0.949111	0.938799	0.944625
Target of Myb protein 1 OS=Homo sapiens GN=TOM1 PE=1 SV=2 - [TOM1_HUMAN]	1.30288	1.54154	0.999538	1.28132
T-box brain protein 1 OS=Homo sapiens GN=TBR1 PE=1 SV=1 - [TBR1_HUMAN]	0.398308	-	0.727249	0.562779
T-complex protein 1 subunit alpha OS=Homo sapiens GN=TCP1 PE=1 SV=1 - [TCPA_HUMAN]	1.05161	1.18356	1.01489	1.08336
T-complex protein 1 subunit beta OS=Homo sapiens GN=CCT2 PE=1 SV=4 - [TCPB_HUMAN]	0.922674	0.781074	0.767829	0.823859
T-complex protein 1 subunit delta OS=Homo sapiens GN=CCT4 PE=1 SV=4 - [TCPD_HUMAN]	0.993352	0.846084	0.748561	0.862665
T-complex protein 1 subunit epsilon OS=Homo sapiens GN=CCT5 PE=1 SV=1 - [TCPE_HUMAN]	0.688697	0.69356	1.15017	0.844141
T-complex protein 1 subunit eta OS=Homo sapiens GN=CCT7 PE=1 SV=2 - [TCPH_HUMAN]	1.04909	1.25837	1.07329	1.12692
T-complex protein 1 subunit gamma OS=Homo sapiens GN=CCT3 PE=1 SV=4 - [TCPG_HUMAN]	1.19854	0.909992	1.06454	1.05769
T-complex protein 1 subunit theta OS=Homo sapiens GN=CCT8 PE=1 SV=4 - [TCPQ_HUMAN]	0.931668	0.93855	1.10955	0.993256
T-complex protein 1 subunit zeta OS=Homo sapiens GN=CCT6A PE=1 SV=3 - [TCPZ_HUMAN]	1.19809	0.955977	0.774559	0.97621
Tensin-3 OS=Homo sapiens GN=TNS3 PE=1 SV=2 - [TENS3_HUMAN]	0.819084	0.964584	1.41437	1.06601
Tetraspanin-3 OS=Homo sapiens GN=TSPAN3 PE=2 SV=1 - [TSN3_HUMAN]	0.559416	0.883099	1.41423	0.95225
Thioredoxin domain-containing protein 5 OS=Homo sapiens GN=TXNDC5 PE=1 SV=2 - [TXND5_HUMAN]	1.04586	1.06435	1.09415	1.06812
Thioredoxin reductase 1, cytoplasmic OS=Homo sapiens GN=TXNRD1 PE=1 SV=3 - [TRXR1_HUMAN]	1.80425	1.37617	1.56644	1.58228
Threonine--tRNA ligase, cytoplasmic OS=Homo sapiens GN=TARS PE=1 SV=3 - [SYTC_HUMAN]	0.862494	0.913348	0.819044	0.864962
Thrombospondin-1 OS=Homo sapiens GN=THBS1 PE=1 SV=2 - [TSP1_HUMAN]	0.810109	0.862817	0.856377	0.843101
Thy-1 membrane glycoprotein OS=Homo sapiens GN=THY1 PE=1 SV=2 - [THY1_HUMAN]	1.01924	0.75645	0.749104	0.841598
Thyroid adenoma-associated protein OS=Homo sapiens GN=THADA PE=1 SV=1 - [THADA_HUMAN]	-	-	0.522583	0.522583
Thyroid hormone receptor-associated protein 3 OS=Homo sapiens GN=THRAP3 PE=1 SV=2 - [TR150_HUMAN]	0.676429	1.07701	-	0.87672
Thyroid receptor-interacting protein 6 OS=Homo sapiens GN=TRIP6 PE=1 SV=3 - [TRIP6_HUMAN]	2.37771	-	-	2.37771
Tissue factor OS=Homo sapiens GN=F3 PE=1 SV=1 - [TF_HUMAN]	1.07091	0.893514	1.22804	1.06415
Transaldolase OS=Homo sapiens GN=TALDO1 PE=1 SV=2 - [TALDO_HUMAN]	1.00189	0.956829	0.903552	0.954091
Transcription intermediary factor 1-beta OS=Homo sapiens GN=TRIM28 PE=1 SV=5 - [TIF1B_HUMAN]	0.455983	0.684465	0.389035	0.509827
Transferrin receptor protein 1 OS=Homo sapiens GN=TFRC PE=1 SV=2 - [TFR1_HUMAN]	0.6386	0.680968	0.675874	0.665147
Transgelin OS=Homo sapiens GN=TAGLN PE=1 SV=4 - [TAGL_HUMAN]	1.2865	0.772083	0.711846	0.923476
Transgelin-2 OS=Homo sapiens GN=TAGLN2 PE=1 SV=3 - [TAGL2_HUMAN]	1.08207	0.997841	1.30597	1.12863
Transitional endoplasmic reticulum ATPase OS=Homo sapiens GN=VCP PE=1 SV=4 - [TERA_HUMAN]	1.18792	1.14559	1.03806	1.12386
Transketolase OS=Homo sapiens GN=TKT PE=1 SV=3 - [TKT_HUMAN]	1.07341	0.994315	1.06109	1.04294
Translational activator GCN1 OS=Homo sapiens GN=GCN1L1 PE=1 SV=6 - [GCN1L_HUMAN]	1.48669	1.35047	1.40805	1.41507
Translocon-associated protein subunit alpha OS=Homo sapiens GN=SSR1 PE=1 SV=3 - [SSRA_HUMAN]	-	1.6033	-	1.6033
Transmembrane 9 superfamily member 3 OS=Homo sapiens GN=TM9SF3 PE=1 SV=2 - [TM9S3_HUMAN]	1.51976	1.23356	1.37076	1.3747
Transmembrane emp24 domain-containing protein 10 OS=Homo sapiens GN=TMED10 PE=1 SV=2 - [TMEDA_HUMAN]	0.765695	0.884326	0.785472	0.811831
Transmembrane glycoprotein NMB OS=Homo sapiens GN=GPNMB PE=1 SV=2 - [GPNMB_HUMAN]	0.841089	0.884513	0.812634	0.846079
Transmembrane protein 106B OS=Homo sapiens GN=TMEM106B PE=1 SV=2 - [T106B_HUMAN]	1.23024	1.26363	1.10713	1.20034
Transmembrane protein 165 OS=Homo sapiens GN=TMEM165 PE=1 SV=1 - [TM165_HUMAN]	-	1.11814	0.888112	1.00312
Transportin-1 OS=Homo sapiens GN=TNPO1 PE=1 SV=2 - [TNPO1_HUMAN]	0.866885	0.747642	0.878198	0.830909
Transportin-3 OS=Homo sapiens GN=TNPO3 PE=1 SV=3 - [TNPO3_HUMAN]	1.23348	-	-	1.23348
Trifunctional enzyme subunit alpha, mitochondrial OS=Homo sapiens GN=HADHA PE=1 SV=2 - [ECHA_HUMAN]	0.854411	1.19705	0.951371	1.00094
Trifunctional enzyme subunit beta, mitochondrial OS=Homo sapiens GN=HADHB PE=1 SV=3 - [ECHB_HUMAN]	1.32022	0.924113	0.810806	1.01838
Trifunctional purine biosynthetic protein adenosine-3 OS=Homo sapiens GN=GART PE=1 SV=1 - [PUR2_HUMAN]	1.33696	1.07402	1.43398	1.28165
Triosephosphate isomerase OS=Homo sapiens GN=TPI1 PE=1 SV=3 - [TPIS_HUMAN]	0.816946	1.01203	0.968184	0.932386
Tripeptidyl-peptidase 2 OS=Homo sapiens GN=TPP2 PE=1 SV=4 - [TPP2_HUMAN]	0.703551	0.568875	0.650585	0.641003
Tropomyosin alpha-4 chain OS=Homo sapiens GN=TPM4 PE=1 SV=3 - [TPM4_HUMAN]	1.0683	1.1665	1.2712	1.16867
Tryptophan--tRNA ligase, cytoplasmic OS=Homo sapiens GN=WARS PE=1 SV=2 - [SYWC_HUMAN]	-	2.20498	-	2.20498
Tubulin alpha-1A chain OS=Homo sapiens GN=TUBA1A PE=1 SV=1 - [TBA1A_HUMAN]	0.616627	0.640938	0.727395	0.661653
Tubulin alpha-1B chain OS=Homo sapiens GN=TUBA1B PE=1 SV=1 - [TBA1B_HUMAN]	1.05777	0.99215	1.02247	1.02413
Tubulin alpha-1C chain OS=Homo sapiens GN=TUBA1C PE=1 SV=1 - [TBA1C_HUMAN]	1.57484	1.10924	1.08172	1.25527
Tubulin alpha-8 chain OS=Homo sapiens GN=TUBA8 PE=1 SV=1 - [TBA8_HUMAN]	-	1.69171	-	1.69171
Tubulin beta chain OS=Homo sapiens GN=TUBB PE=1 SV=2 - [TBB5_HUMAN]	0.704058	0.621617	0.634919	0.653532
Tubulin beta-2A chain OS=Homo sapiens GN=TUBB2A PE=1 SV=1 - [TBB2A_HUMAN]	2.27269	0.835399	-	1.55404
Tubulin beta-3 chain OS=Homo sapiens GN=TUBB3 PE=1 SV=2 - [TBB3_HUMAN]	0.95878	0.436287	1.54748	0.980849
Tubulin beta-4A chain OS=Homo sapiens GN=TUBB4A PE=1 SV=2 - [TBB4A_HUMAN]	0.493723	-	0.536658	0.51519
Tubulin beta-4B chain OS=Homo sapiens GN=TUBB4B PE=1 SV=1 - [TBB4B_HUMAN]	0.562254	0.589906	0.568759	0.57364
Tubulin beta-6 chain OS=Homo sapiens GN=TUBB6 PE=1 SV=1 - [TBB6_HUMAN]	1.2142	0.901162	1.31495	1.14344
Tumor necrosis factor receptor superfamily member 10B OS=Homo sapiens GN=TNFRSF10B PE=1 SV=2 - [TR10B_HUMAN]	0.767809	-	-	0.767809
Tumor necrosis factor receptor superfamily member 10D OS=Homo sapiens GN=TNFRSF10D PE=1 SV=1 - [TR10D_HUMAN]	-	3.0289	-	3.0289
Tyrosine-protein kinase receptor UFO OS=Homo sapiens GN=AXL PE=1 SV=3 - [UFO_HUMAN]	1.14753	0.818649	0.843268	0.936483
Tyrosine--tRNA ligase, cytoplasmic OS=Homo sapiens GN=YARS PE=1 SV=4 - [SYYC_HUMAN]	2.11706	-	-	2.11706
U5 small nuclear ribonucleoprotein 200 kDa helicase OS=Homo sapiens GN=SNRNP200 PE=1 SV=2 - [U520_HUMAN]	0.747065	0.917382	0.752836	0.805761
Ubiquitin carboxyl-terminal hydrolase 14 OS=Homo sapiens GN=USP14 PE=1 SV=3 - [UBP14_HUMAN]	1.47636	1.01826	1.60867	1.36776
Ubiquitin carboxyl-terminal hydrolase 5 OS=Homo sapiens GN=USP5 PE=1 SV=2 - [UBP5_HUMAN]	1.17072	1.30437	1.53669	1.33726
Ubiquitin carboxyl-terminal hydrolase isozyme L1 OS=Homo sapiens GN=UCHL1 PE=1 SV=2 - [UCHL1_HUMAN]	1.09837	0.953402	0.892466	0.981413
Ubiquitin-associated protein 2-like OS=Homo sapiens GN=UBAP2L PE=1 SV=2 - [UBP2L_HUMAN]	1.2888	0.742569	-	1.01569
Ubiquitin-conjugating enzyme E2 variant 2 OS=Homo sapiens GN=UBE2V2 PE=1 SV=4 - [UB2V2_HUMAN]	0.92792	1.05992	-	0.993918
Ubiquitin-like modifier-activating enzyme 1 OS=Homo sapiens GN=UBA1 PE=1 SV=3 - [UBA1_HUMAN]	1.09036	1.10475	1.18195	1.12569
UDP-glucose 6-dehydrogenase OS=Homo sapiens GN=UGDH PE=1 SV=1 - [UGDH_HUMAN]	0.626094	1.33205	0.91851	0.958885
UDP-glucose:glycoprotein glucosyltransferase 1 OS=Homo sapiens GN=UGGT1 PE=1 SV=3 - [UGGG1_HUMAN]	1.03608	1.01301	1.05329	1.03413
UDP-N-acetylhexosamine pyrophosphorylase OS=Homo sapiens GN=UAP1 PE=1 SV=3 - [UAP1_HUMAN]	-	0.490121	0.326727	0.408424
Uncharacterized protein KIAA0090 OS=Homo sapiens GN=KIAA0090 PE=1 SV=1 - [K0090_HUMAN]	0.734937	1.1447	2.13158	1.33707
Unconventional myosin-Ic OS=Homo sapiens GN=MYO1C PE=1 SV=4 - [MYO1C_HUMAN]	1.14259	1.27906	0.93029	1.11731
Unconventional myosin-Ie OS=Homo sapiens GN=MYO1E PE=1 SV=2 - [MYO1E_HUMAN]	-	0.463614	1.23238	0.847996
Unconventional myosin-VI OS=Homo sapiens GN=MYO6 PE=1 SV=4 - [MYO6_HUMAN]	2.04313	1.27647	0.996548	1.43871
Unconventional myosin-XVIIIa OS=Homo sapiens GN=MYO18A PE=1 SV=3 - [MY18A_HUMAN]	1.93044	-	-	1.93044
UPF0505 protein C16orf62 OS=Homo sapiens GN=C16orf62 PE=1 SV=2 - [CP062_HUMAN]	0.645273	-	-	0.645273
UV excision repair protein RAD23 homolog B OS=Homo sapiens GN=RAD23B PE=1 SV=1 - [RD23B_HUMAN]	1.29184	1.7115	1.03191	1.34508
Vacuolar protein sorting-associated protein 13C OS=Homo sapiens GN=VPS13C PE=1 SV=1 - [VP13C_HUMAN]	-	3.70622	-	3.70622
Vacuolar protein sorting-associated protein 35 OS=Homo sapiens GN=VPS35 PE=1 SV=2 - [VPS35_HUMAN]	1.13646	0.971179	0.954534	1.02072
Vacuolar protein sorting-associated protein 52 homolog OS=Homo sapiens GN=VPS52 PE=1 SV=1 - [VPS52_HUMAN]	5.5272	-	-	5.5272
Valine--tRNA ligase OS=Homo sapiens GN=VARS PE=1 SV=4 - [SYVC_HUMAN]	1.46809	1.6664	1.66917	1.60122
Very long-chain specific acyl-CoA dehydrogenase, mitochondrial OS=Homo sapiens GN=ACADVL PE=1 SV=1 - [ACADV_HUMAN]	1.07022	1.80529	1.33447	1.40332
Very-long-chain (3R)-3-hydroxyacyl-[acyl-carrier protein] dehydratase 3 OS=Homo sapiens GN=PTPLAD1 PE=1 SV=2 - [HACD3_HUMAN]	-	2.35061	0.730509	1.54056
Very-long-chain enoyl-CoA reductase OS=Homo sapiens GN=TECR PE=1 SV=1 - [TECR_HUMAN]	0.751895	-	0.665515	0.708705
Vesicle transport protein GOT1B OS=Homo sapiens GN=GOLT1B PE=1 SV=1 - [GOT1B_HUMAN]	3.1805	-	1.79773	2.48911
Vesicle-trafficking protein SEC22b OS=Homo sapiens GN=SEC22B PE=1 SV=4 - [SC22B_HUMAN]	1.03865	1.00715	1.04872	1.03151
Vigilin OS=Homo sapiens GN=HDLBP PE=1 SV=2 - [VIGLN_HUMAN]	0.915187	0.957209	0.766149	0.879515
Vimentin OS=Homo sapiens GN=VIM PE=1 SV=4 - [VIME_HUMAN]	0.839141	0.879455	0.817601	0.845399
Vinculin OS=Homo sapiens GN=VCL PE=1 SV=4 - [VINC_HUMAN]	0.809802	0.837479	0.777922	0.808401
Vitamin K epoxide reductase complex subunit 1 OS=Homo sapiens GN=VKORC1 PE=1 SV=1 - [VKOR1_HUMAN]	0.753381	0.750719	-	0.75205
Voltage-dependent anion-selective channel protein 1 OS=Homo sapiens GN=VDAC1 PE=1 SV=2 - [VDAC1_HUMAN]	1.00976	1.12904	1.15623	1.09834
Voltage-dependent anion-selective channel protein 2 OS=Homo sapiens GN=VDAC2 PE=1 SV=2 - [VDAC2_HUMAN]	0.753365	1.4992	1.00755	1.0867
V-type proton ATPase 116 kDa subunit a isoform 1 OS=Homo sapiens GN=ATP6V0A1 PE=2 SV=3 - [VPP1_HUMAN]	-	2.31778	-	2.31778
V-type proton ATPase catalytic subunit A OS=Homo sapiens GN=ATP6V1A PE=1 SV=2 - [VATA_HUMAN]	0.763712	0.786513	0.811493	0.787239
V-type proton ATPase subunit B, brain isoform OS=Homo sapiens GN=ATP6V1B2 PE=1 SV=3 - [VATB2_HUMAN]	0.773465	0.448223	1.92108	1.04759
WASH complex subunit 7 OS=Homo sapiens GN=KIAA1033 PE=1 SV=2 - [WASH7_HUMAN]	0.577828	1.08367	-	0.830747
WASH complex subunit FAM21C OS=Homo sapiens GN=FAM21C PE=1 SV=3 - [FA21C_HUMAN]	-	0.894426	-	0.894426
WD repeat-containing protein 1 OS=Homo sapiens GN=WDR1 PE=1 SV=4 - [WDR1_HUMAN]	1.02982	1.02859	1.03901	1.03248
Wolframin OS=Homo sapiens GN=WFS1 PE=1 SV=2 - [WFS1_HUMAN]	2.085	0.55139	1.18812	1.27484
Xaa-Pro aminopeptidase 1 OS=Homo sapiens GN=XPNPEP1 PE=1 SV=3 - [XPP1_HUMAN]	-	0.826639	1.40424	1.11544
X-ray repair cross-complementing protein 5 OS=Homo sapiens GN=XRCC5 PE=1 SV=3 - [XRCC5_HUMAN]	0.860277	0.826041	0.865541	0.85062
X-ray repair cross-complementing protein 6 OS=Homo sapiens GN=XRCC6 PE=1 SV=2 - [XRCC6_HUMAN]	1.1532	1.04421	0.954521	1.05064
YLP motif-containing protein 1 OS=Homo sapiens GN=YLPM1 PE=1 SV=3 - [YLPM1_HUMAN]	1.24773	-	-	1.24773
Zyxin OS=Homo sapiens GN=ZYX PE=1 SV=1 - [ZYX_HUMAN]	1.6216	1.54299	1.2127	1.4591

## Sheet: Table S5B
Table S5B: SILAC on IGR-CaP1-Dtx-R cells.
Full name	Light/Heavy Ratio 1	Light/Heavy Ratio 2	Light/Heavy Ratio 3	Average
10 kDa heat shock protein, mitochondrial OS=Homo sapiens GN=HSPE1 PE=1 SV=2 - [CH10_HUMAN]	1.02643	0.963546	0.967304	0.985759
116 kDa U5 small nuclear ribonucleoprotein component OS=Homo sapiens GN=EFTUD2 PE=1 SV=1 - [U5S1_HUMAN]	0.995359	1.04083	1.11954	1.05191
14 kDa phosphohistidine phosphatase OS=Homo sapiens GN=PHPT1 PE=1 SV=1 - [PHP14_HUMAN]	0.840045	0.932248	0.922924	0.898406
14-3-3 protein beta/alpha OS=Homo sapiens GN=YWHAB PE=1 SV=3 - [1433B_HUMAN]	0.919154	1.05766	1.00021	0.992341
14-3-3 protein epsilon OS=Homo sapiens GN=YWHAE PE=1 SV=1 - [1433E_HUMAN]	0.941774	1.04417	1.05073	1.01223
14-3-3 protein eta OS=Homo sapiens GN=YWHAH PE=1 SV=4 - [1433F_HUMAN]	1.15085	1.21425	1.06218	1.14243
14-3-3 protein gamma OS=Homo sapiens GN=YWHAG PE=1 SV=2 - [1433G_HUMAN]	1.10309	1.11283	1.28855	1.16816
14-3-3 protein sigma OS=Homo sapiens GN=SFN PE=1 SV=1 - [1433S_HUMAN]	1.16043	0.94163	1.12487	1.07564
14-3-3 protein theta OS=Homo sapiens GN=YWHAQ PE=1 SV=1 - [1433T_HUMAN]	1.07436	1.42525	1.42021	1.30661
14-3-3 protein zeta/delta OS=Homo sapiens GN=YWHAZ PE=1 SV=1 - [1433Z_HUMAN]	0.968552	0.93255	0.930187	0.943763
182 kDa tankyrase-1-binding protein OS=Homo sapiens GN=TNKS1BP1 PE=1 SV=4 - [TB182_HUMAN]	1.49077	1.07856	1.11986	1.22973
26S protease regulatory subunit 10B OS=Homo sapiens GN=PSMC6 PE=1 SV=1 - [PRS10_HUMAN]	0.604875	-	0.890072	0.747473
[truncated: 1,211 more rows]
